# Supplementary material for: Gene-expression patterns in peripheral blood classify familial breast cancer susceptibility
Source: PubMed Central journal article supplement (PMC4634735; doi:10.1186/s12920-015-0145-6), 2015-11-04
Supplement: 12920_2015_145_MOESM2_ESM.pdf [file 12920_2015_145_MOESM2_ESM.pdf]

| Health Survey Variable | Min | Max | Average | Counts                           |
|------------------------|-----|-----|---------|----------------------------------|
| Age                    | 35  | 76  | 56.65   |                                  |
| Edu                    |     |     |         | 2=2; 3=14; 4=4; 5=20; 6=18; 7=5  |
| Marital                |     |     |         | 1=1; 2=53; 3=0; 4=5; 5=4         |
| RelPref                |     |     |         | 1=6; 5=4; 6=2; 34=1; 37=49; 70=1 |
| Health                 |     |     |         | 1=15; 2=25; 3=19; 4=3; 5=1       |
| Physical               |     |     |         | 1=3; 2=38; 3=14; 4=6; 5=2        |
| MenstrAge              | 9   | 16  | 12.67   |                                  |
| Contr                  |     |     |         | 1=45; 2=18                       |
| ContrAge1st            | 17  | 48  | 24.38   |                                  |
| Pregnant               |     |     |         | 1=62; 2=1                        |
| PregnantNo             | 1   | 10  | 4.44    |                                  |
| TtlLiveBirth           | 0   | 7   | 3.73    |                                  |
| FirstBirthAge          | 18  | 35  | 23.33   |                                  |
| LastBirthAge           | 18  | 40  | 31.61   |                                  |
| BrFeed                 |     |     |         | 1=43; 2=18                       |
| UnableChild            |     |     |         | 1=44; 2=18; 9=1                  |
| Period                 |     |     |         | 1=7; 2=3; 3=1; 4=52              |
| PeriodStop             |     |     |         | 1=48; 2=15                       |
| PeriodAge              | 29  | 58  | 45.25   |                                  |
| Tamoxifen              |     |     |         | 1=11; 2=52                       |
| Alcohol                |     |     |         | 1=13; 2=50                       |
| CigSmoke               |     |     |         | 1=9; 2=54                        |
| Employment             |     |     |         | 1=18; 2=14; 3=31                 |
| Polyps                 |     |     |         | 1=10; 2=23                       |
| ImmunoDisorder         |     |     |         | 1=25; 2=38                       |
| Hypertension           |     |     |         | 1=16; 2=47                       |
| AntiInfDrug            |     |     |         | 1=24; 2=39                       |

This table summarizes health-survey responses that were provided by research participants from the Utah cohort. The first column indicates the data points that were collected. The Min and Max columns indicate the minimum and maximum values across all participants. The Average column indicates the average value across all responses. For discrete variables, the Counts column indicates the number of people who provided each response. Descriptions of these variables are provided in Additional file 3.
