# Supplementary material for: Gene-expression patterns in peripheral blood classify familial breast cancer susceptibility
Source: PubMed Central journal article supplement (PMC4634735; doi:10.1186/s12920-015-0145-6), 2015-11-04
Supplement: 12920_2015_145_MOESM3_ESM.pdf [file 12920_2015_145_MOESM3_ESM.pdf]

| Patient   | Age | Edu | Marital | RelPref | Health | Physical | MenstrAge | Contr | ContraAge | 1st Pregnant | PregnantNo | TtlLiveBirth | FirstBirthAge | LastBirthAge | BrFeed | UnableChild | Period | PeriodStop | PeriodAge | Tamoxifen | Alcohol | CigSmoke | Employment | Polyps | ImmunoDisorder | Hypertension | AntinfDrug |
|-----------|-----|-----|---------|---------|--------|----------|-----------|-------|-----------|--------------|------------|--------------|---------------|--------------|--------|-------------|--------|------------|-----------|-----------|---------|----------|------------|--------|----------------|--------------|------------|
| Utah_C06  | 50  | 5   | 2       | 37      | 2      | 4        | 13        | 1     | 25        | 1            | 7          | 7            | 20            | 34           | 1      | 1           | 4      | 1          | 48        | 1         | 2       | 2        | 2          | 2      | 2              | 2            | 2          |
| Utah_I06  | 55  | 6   | 2       | 34      | 1      | 5        | 14        | 1     | 22        | 1            | 1          | 1            | 27            | 27           | 2      | 2           | 4      | 1          | 45        | 2         | 2       | 1        | 1          | NA     | 2              | 2            | 2          |
| Utah_G12* | 47  | 6   | 4       | 37      | 2      | 2        | 12        | 2     | NA        | 1            | 1          | 0            | NA            | NA           | NA     | 1           | 4      | 1          | 41        | 2         | 2       | 2        | 2          | 1      | NA             | 1            | 1          |
| Utah_H08  | 67  | 6   | 2       | 37      | 3      | 3        | 12        | 1     | 34        | 1            | 2          | 2            | 34            | 36           | 2      | 2           | 4      | 1          | 58        | 2         | 2       | 2        | 2          | 3      | NA             | 1            | 2          |
| Utah_D12  | 49  | 3   | 2       | 37      | 3      | 3        | 14        | 1     | 19        | 1            | 6          | 6            | 20            | 34           | 1      | 1           | 4      | 1          | 47        | 2         | 2       | 2        | 2          | 2      | NA             | 2            | 2          |
| Utah_D08  | 76  | 4   | 2       | 37      | 4      | 3        | 15        | 2     | NA        | 1            | 4          | 4            | 21            | 31           | 2      | 2           | 4      | 1          | 32        | 2         | 2       | 2        | 1          | 2      | 1              | 1            | 1          |
| Utah_E11  | 54  | 5   | 2       | 37      | 3      | 2        | 9         | 1     | 21        | 1            | 10         | 5            | 18            | 28           | 1      | 1           | 4      | 1          | 29        | 2         | 1       | 1        | 3          | 2      | 1              | 1            | 1          |
| Utah_H05  | 45  | 5   | 2       | 37      | 2      | 1        | 13        | 1     | 18        | 1            | 3          | 2            | 31            | 35           | 1      | 1           | 1      | 2          | NA        | 2         | 2       | 2        | 2          | 3      | NA             | 2            | 2          |
| Utah_C07  | 52  | 6   | 2       | 37      | 3      | 3        | 11        | 1     | 23        | 1            | 6          | 5            | 26            | 39           | 1      | 1           | 4      | 1          | 51        | 2         | 2       | 2        | 2          | 3      | NA             | 1            | 2          |
| Utah_K02  | 53  | 5   | 2       | 5       | 3      | 3        | 14        | 1     | 21        | 1            | 3          | 2            | 35            | 38           | 2      | 1           | 2      | 2          | NA        | 2         | 2       | 2        | 2          | 3      | 2              | 2            | 2          |
| Utah_E08  | 64  | 5   | 2       | 1       | 1      | 2        | 12        | 1     | 30        | 1            | 4          | 3            | 19            | 29           | 2      | 1           | 4      | 1          | 55        | 2         | 1       | 1        | 3          | NA     | 1              | 1            | 1          |
| Utah_E02  | 46  | 7   | 4       | 37      | 2      | 2        | 14        | 1     | 22        | 1            | 4          | 4            | 24            | 38           | 1      | 1           | 3      | 1          | 45        | 2         | 2       | 2        | 2          | 2      | NA             | 2            | 1          |
| Utah_H10  | 56  | 7   | 2       | 1       | 2      | 2        | 11        | 1     | 21        | 1            | 3          | 2            | 24            | 27           | 2      | 1           | 4      | 1          | 52        | 1         | 2       | 2        | 2          | 1      | NA             | 2            | 2          |
| Utah_D10  | 55  | 3   | 2       | 37      | 2      | 2        | 12        | 1     | 20        | 1            | 3          | 3            | 19            | 26           | 2      | 1           | 4      | 1          | 46        | 2         | 2       | 2        | 2          | 2      | NA             | 2            | 2          |
| Utah_D11  | 59  | 7   | 4       | 37      | 2      | 5        | 12        | 1     | 23        | 1            | 3          | 3            | 24            | 29           | 1      | 2           | 4      | 2          | NA        | 2         | 1       | 2        | 3          | NA     | 2              | 2            | 2          |
| Utah_I05  | 62  | 5   | 2       | 37      | 2      | 2        | 14        | 2     | NA        | 1            | 5          | 5            | 21            | 36           | 1      | 1           | 4      | 1          | 54        | 2         | 2       | 2        | 3          | 2      | 1              | 1            | 2          |
| Utah_I07  | 51  | 3   | 2       | 37      | 3      | 2        | 13        | 1     | 17        | 1            | 6          | 5            | 20            | 28           | 1      | 2           | 1      | 2          | NA        | 2         | 2       | 2        | 1          | 2      | 1              | 1            | 2          |
| Utah_I08  | 51  | 5   | 2       | 37      | 1      | 2        | 13        | 1     | 20        | 1            | 6          | 6            | 19            | 29           | 1      | 1           | 4      | 1          | 43        | 2         | 2       | 2        | 1          | NA     | 2              | 2            | 2          |
| Utah_B01  | 56  | 5   | 2       | 6       | 1      | 2        | 14        | 1     | 22        | 1            | 3          | 2            | 29            | 31           | 1      | 1           | 4      | 1          | 37        | 2         | 1       | 1        | 3          | 2      | 2              | 2            | 2          |
| Utah_I10  | 67  | 4   | 5       | 37      | 2      | 4        | 13        | 2     | NA        | 1            | 5          | 5            | 18            | 32           | 1      | 1           | 4      | 1          | 33        | 2         | 2       | 2        | 1          | 1      | 1              | 1            | 1          |
| Utah_C09  | 54  | 5   | 2       | 37      | 3      | 2        | 12        | 2     | NA        | 1            | 3          | 1            | 18            | 18           | 1      | 2           | 4      | 1          | 48        | 2         | 2       | 2        | 2          | 1      | NA             | 2            | 1          |
| Utah_H01  | 55  | 3   | 2       | 5       | 3      | 4        | 10        | 1     | 19        | 1            | 3          | 1            | 28            | 29           | 1      | 2           | 4      | 1          | 46        | 2         | 2       | 2        | 2          | 2      | NA             | 1            | 2          |
| Utah_B04  | 50  | 3   | 2       | 37      | 2      | 2        | 12        | 1     | 19        | 1            | 4          | 4            | 21            | 29           | 1      | 1           | 4      | 1          | 37        | 1         | 2       | 2        | 2          | 2      | NA             | 2            | 2          |
| Utah_G11  | 53  | 6   | 2       | 37      | 4      | 2        | 12        | 2     | NA        | 1            | 4          | 4            | 24            | 35           | 2      | 1           | 4      | 1          | 51        | 1         | 2       | 2        | 3          | 1      | 2              | 2            | 1          |
| Utah_E12  | 63  | 5   | 2       | 37      | 2      | 1        | 13        | 1     | 30        | 1            | 3          | 3            | 25            | 28           | 2      | 1           | 4      | 1          | 54        | 1         | 1       | 2        | 3          | 2      | 1              | 1            | 1          |
| Utah_C08  | 56  | 7   | 4       | 1       | 1      | 3        | 12        | 1     | 24        | 1            | 2          | 2            | 31            | 33           | 1      | 1           | 4      | 1          | 41        | 2         | 1       | 1        | 1          | 2      | 2              | 2            | 2          |
| Utah_C03  | 72  | 2   | 2       | 37      | 1      | 3        | 15        | 2     | NA        | 1            | 4          | 4            | 27            | 37           | 1      | 2           | 4      | 1          | 54        | 1         | 2       | 2        | 3          | 2      | 1              | 2            | 2          |
| Utah_I12  | 54  | 6   | 2       | 37      | 1      | 2        | 13        | 1     | 48        | 1            | 7          | 7            | 25            | 39           | 1      | 2           | 4      | 1          | 49        | 2         | 2       | 2        | 3          | NA     | 1              | 2            | 1          |
| Utah_C02  | 51  | 5   | 2       | 37      | 1      | 2        | 13        | 1     | 31        | 1            | 5          | 5            | 20            | 31           | 1      | 1           | 1      | 2          | NA        | 2         | 2       | 2        | 1          | NA     | 2              | 2            | 2          |
| Utah_E06  | 57  | 3   | 2       | 37      | 3      | 2        | 15        | 2     | NA        | 1            | 4          | 4            | 20            | 31           | 1      | 2           | 4      | 1          | 36        | 2         | 2       | 2        | 3          | 2      | 1              | 2            | 2          |
| Utah_H02  | 54  | 3   | 2       | 37      | 5      | 2        | 14        | 1     | 25        | 1            | 3          | 3            | 20            | 27           | 1      | 2           | 4      | 1          | 30        | 2         | 1       | 2        | 2          | 1      | 1              | 1            | 2          |
| Utah_E05  | 58  | 3   | 2       | 37      | 2      | 4        | 12        | 1     | 19        | 1            | 6          | 4            | 22            | 28           | 1      | 1           | 4      | 1          | 45        | 2         | 2       | 2        | 2          | 2      | 2              | 1            | 2          |
| Utah_E10  | 75  | 3   | 2       | 37      | 2      | 2        | 13        | 1     | 35        | 1            | 6          | 6            | 20            | 29           | 2      | 2           | 4      | 1          | 52        | 2         | 2       | 2        | 3          | 1      | 1              | 1            | 2          |
| Utah_E01  | 58  | 6   | 2       | 37      | 3      | 3        | 12        | 2     | NA        | 1            | 7          | 4            | 23            | 34           | 1      | 2           | 4      | 1          | 48        | 2         | 2       | 2        | 3          | 2      | 2              | 2            | 2          |
| Utah_G08  | 57  | 5   | 2       | 37      | 1      | 2        | 12        | 1     | 21        | 1            | 4          | 4            | 23            | 29           | 1      | 1           | 4      | 1          | 38        | 2         | 2       | 2        | 2          | 2      | 2              | 2            | 2          |
| Utah_E07  | 62  | 5   | 2       | 37      | 3      | 2        | 13        | 1     | 32        | 1            | 3          | 4            | 31            | 38           | 2      | 1           | 4      | 2          | NA        | 1         | 2       | 2        | 3          | 2      | 2              | 2            | 2          |
| Utah_G07  | 56  | 6   | 2       | 1       | 2      | 2        | 16        | 1     | 21        | 1            | 5          | 3            | 28            | 37           | 1      | 1           | 4      | 2          | NA        | 2         | 2       | 2        | 1          | 2      | 2              | 2            | 1          |
| Utah_I11  | 65  | 5   | 5       | 37      | 3      | 3        | 14        | 1     | 20        | 1            | 4          | 4            | 20            | 36           | 2      | 1           | 4      | 1          | 50        | 2         | 2       | 2        | 3          | 2      | 2              | 1            | 1          |
| Utah_K03  | 50  | 4   | 2       | 37      | 2      | 4        | 12        | 1     | 21        | 1            | 5          | 4            | 23            | 29           | 1      | 1           | 4      | 1          | 43        | 2         | 2       | 2        | 2          | 2      | 2              | 2            | 2          |
| Utah_K04  | 76  | 3   | 5       | 37      | 3      | 3        | 11        | 1     | 32        | 1            | 4          | 4            | 19            | 35           | 2      | 2           | 4      | 2          | NA        | 2         | 2       | 2        | 3          | NA     | 1              | 1            | 1          |
| Utah_K05  | 56  | 5   | 5       | 37      | 3      | 2        | 12        | 1     | 24        | 1            | 4          | 3            | 25            | 32           | 1      | 1           | 4      | 1          | 38        | 2         | 2       | 2        | 1          | 1      | 1              | 2            | 1          |
| Utah_C05  | 65  | 6   | 2       | 70      | 1      | 2        | 12        | 1     | 40        | 1            | 3          | 3            | 23            | 30           | 1      | 1           | 4      | 1          | 55        | 1         | 1       | 1        | 3          | 1      | 2              | 1            | 2          |
| Utah_G06  | 69  | 4   | 2       | 37      | 2      | 2        | 14        | 2     | NA        | 1            | 4          | 4            | 21            | 30           | 1      | 2           | 4      | 1          | 55        | 2         | 2       | 2        | 3          | 2      | 1              | 2            | 1          |
| Utah_E04  | 53  | 6   | 4       | 37      | 3      | 2        | 15        | 1     | 23        | 1            | 3          | 3            | 24            | 31           | 2      | 9           | 4      | 1          | 50        | 2         | 2       | 2        | 1          | NA     | 2              | 2            | 2          |
| Utah_G02  | 53  | 7   | 2       | 5       | 1      | 2        | 12        | 2     | NA        | 1            | 3          | 3            | 28            | 36           | 1      | 1           | 1      | 2          | NA        | 2         | 1       | 2        | 1          | NA     | 2              | 2            | 2          |
| Utah_K01  | 35  | 5   | 2       | 37      | 3      | 3        | 10        | 1     | 19        | 1            | 5          | 4            | 20            | 27           | 1      | 1           | 1      | 2          | NA        | 2         | 2       | 2        | 3          | NA     | 2              | 2            | 2          |
| Utah_E09  | 43  | 6   | 2       | 37      | 2      | 2        | 13        | 1     | 27        | 1            | 2          | 2            | 32            | 35           | 1      | 1           | 1      | 2          | NA        | 2         | 2       | 2        | 2          | NA     | 2              | 2            | 1          |
| Utah_D07  | 68  | 3   | 2       | 37      | 3      | 3        | 15        | 2     | NA        | 1            | 3          | 3            | 18            | 30           | 2      | 1           | 4      | 2          | NA        | 2         | 2       | 2        | 3          | 1      | 2              | 2            | 1          |
| Utah_H03  | 51  | 3   | 2       | 37      | 3      | 2        | 13        | 1     | 20        | 1            | 7          | 3            | 19            | 30           | 1      | 1           | 4      | 1          | 29        | 2         | 1       | 1        | 1          | 1      | 1              | 1            | 1          |
| Utah_G10  | 64  | 2   | 2       | 37      | 2      | 4        | 11        | 2     | NA        | 1            | 6          | 6            | 18            | 25           | 1      | 1           | 2      | 1          | 40        | 1         | 2       | 2        | 3          | 2      | 1              | 2            | 1          |
| Utah_B08  | 57  | 6   | 2       | 6       | 1      | 2        | 11        | 1     | 23        | 1            | 4          | 2            | 27            | 28           | 1      | 1           | 4      | 1          | 51        | 2         | 2       | 2        | 2          | 2      | NA             | 1            | 2          |
| Utah_H11  | 69  | 6   | 2       | 37      | 2      | 2        | 14        | 2     | NA        | 1            | 5          | 4            | 28            | 35           | 1      | 2           | 4      | 1          | 54        | 1         | 2       | 2        | 3          | 2      | 2              | 2            | 2          |
| Utah_G03  | 58  | 6   | 2       | 5       | 2      | 2        | 13        | 1     | 32        | 1            | 3          | 3            | 24            | 27           | 1      | 1           | 4      | 2          | NA        | 2         | 1       | 1        | 3          | NA     | 2              | 2            | 2          |
| Utah_C10* | 51  | 5   | 1       | 1       | 2      | 3        | 11        | 1     | 18        | 2            | NA         | NA           | NA            | NA           | NA     | 2           | 4      | 1          | 45        | 2         | 1       | 1        | 1          | 2      | 2              | 2            | 1          |
| Utah_B07  | 65  | 3   | 2       | 37      | 4      | 2        | 11        | 2     | NA        | 1            | 9          | 7            | 18            | 40           | 1      | 1           | 4      | 1          | 50        | 2         | 2       | 2        | 3          | 2      | 1              | 2            | 1          |
| Utah_B06  | 47  | 5   | 2       | 37      | 2      | 2        | 12        | 1     | 19        | 1            | 4          | 4            | 22            | 28           | 1      | 1           | 2      | 2          | NA        | 2         | 2       | 2        | 2          | NA     | 2              | 2            | 2          |
| Utah_I09  | 48  | 6   | 2       | 37      | 3      | 2        | 12        | 2     | NA        | 1            | 7          | 6            | 25            | 36           | 1      | 1           | 4      | 1          | 37        | 2         | 2       | 2        | 3          | 1      | 1              | 1            | 1          |
| Utah_G09  | 47  | 6   | 2       | 37      | 1      | 2        | 13        | 1     | 22        | 1            | 9          | 5            | 24            | 36           | 1      | 1           | 4      | 1          | 44        | 2         | 2       | 2        | 2          | 2      | NA             | 2            | 1          |
| Utah_B05  | 50  | 3   | 2       | 1       | 1      | 2        | 13        | 1     | 20        | 1            | 2          | 2            | 21            | 25           | 2      | 1           | 4      | 1          | 42        | 2         | 1       | 2        | 2          | 1      | NA             | 2            | 2          |
| Utah_C11  | 51  | 6   | 2       | 37      | 1      | 2        | 13        | 1     | 19        | 1            | 4          | 4            | 20            | 30           | 2      | 1           | 4      | 1          | 45        | 2         | 2       | 2        | 2          | 1      | NA             | 2            | 2          |
| Utah_F03  | 66  | 5   | 2       | 37      | 2      | 2        | 11        | 1     | 36        | 1            | 3          | 3            | 20            | 28           | 1      | 1           | 4      | 1          | 51        | 1         | 2       | 2        | 3          | 1      | 1              | 2            | 2          |
| Utah_G05  | 65  | 5   | 2       | 37      | 2      | 3        | 13        | 2     | NA        | 1            | 7          | 5            | 22            | 31           | 2      | 1           | 4      | 1          | 48        | 2         | 2       | 2        | 3          | 2      | 2              | 2            | 2          |
| Utah_C01  | 47  | 6   | 2       | 37      | 2      | 1        | 13        | 2     | NA        | 1            | 7          | 5            | 27            | 39           | 1      | 2           | 1      | 2          | NA        | 2         | 2       | 2        | 3          | NA     | 2              | 2            | 2          |

This table contains health-survey responses that were provided by research participants from the Utah cohort. Descriptions of the variables are provided in Additional file 3.
