# Supplementary material for: Gene-expression patterns in peripheral blood classify familial breast cancer susceptibility
Source: PubMed Central journal article supplement (PMC4634735; doi:10.1186/s12920-015-0145-6), 2015-11-04
Supplement: 12920_2015_145_MOESM7_ESM.pdf [file 12920_2015_145_MOESM7_ESM.pdf]

| Entrez Gene ID | Gene Symbol  | Gene Name                                                                        |
|----------------|--------------|----------------------------------------------------------------------------------|
| 87688          | RPL7AP50     | ribosomal protein L7a pseudogene 50                                              |
| 391106         | VDAC1P9      | voltage-dependent anion channel 1 pseudogene 9                                   |
| 100128709      | [No Symbol]  | [No Name]                                                                        |
| 646272         | LOC646272    | cytochrome b-c1 complex subunit 8-like                                           |
| 100128700      | [No Symbol]  | [No Name]                                                                        |
| 286495         | TTC3P1       | tetratricopeptide repeat domain 3 pseudogene 1                                   |
| 392282         | RPS5P6       | ribosomal protein S5 pseudogene 6                                                |
| 541468         | C1orf190     | chromosome 1 open reading frame 190                                              |
| 83604          | TMEM47       | transmembrane protein 47                                                         |
| 400954         | EML6         | echinoderm microtubule associated protein like 6                                 |
| 647298         | HSPD1P8      | heat shock 60kDa protein 1 (chaperonin) pseudogene 8                             |
| 100132626      | LOC100132626 | protein FAM103A1-like                                                            |
| 440278         | CATSPER2P1   | cation channel, sperm associated 2 pseudogene 1                                  |
| 100128493      | LOC100128493 | ubiquitin-conjugating enzyme E2 variant 2 pseudogene                             |
| 390155         | OR5T1        | olfactory receptor, family 5, subfamily T, member 1                              |
| 128774         | MRPS11P1     | mitochondrial ribosomal protein S11 pseudogene 1                                 |
| 641518         | LOC641518    | hypothetical LOC641518                                                           |
| 149157         | [No Symbol]  | [No Name]                                                                        |
| 7473           | WNT3         | wingless-type MMTV integration site family, member 3                             |
| 54436          | SH3TC1       | SH3 domain and tetratricopeptide repeats 1                                       |
| 5999           | RGS4         | regulator of G-protein signaling 4                                               |
| 28869          | IGKV6D-41    | immunoglobulin kappa variable 6D-41 (non-functional)                             |
| 55604          | LRRC16A      | leucine rich repeat containing 16A                                               |
| 449518         | LOC449518    | purinergic receptor P2Y, G-protein coupled, 10 pseudogene                        |
| 79825          | CCDC48       | coiled-coil domain containing 48                                                 |
| 3809           | KIR2DS4      | killer cell immunoglobulin-like receptor, two domains, short cytoplasmic tail, 4 |
| 442673         | TUBG1P       | tubulin, gamma 1 pseudogene                                                      |
| 51266          | CLEC1B       | C-type lectin domain family 1, member B                                          |
| 100129822      | [No Symbol]  | [No Name]                                                                        |
| 100131609      | HNRNPA1P2    | heterogeneous nuclear ribonucleoprotein A1 pseudogene 2                          |
| 389428         | RPL5P18      | ribosomal protein L5 pseudogene 18                                               |
| 100128386      | LOC100128386 | hypothetical LOC100128386                                                        |

|           |              |                                                                                                                   |
|-----------|--------------|-------------------------------------------------------------------------------------------------------------------|
| 55270     | NUDT15       | nudix (nucleoside diphosphate linked moiety X)-type motif 15                                                      |
| 649489    | LOC649489    | protein phosphatase 1, regulatory (inhibitor) subunit 2 pseudogene                                                |
| 643586    | LOC643586    | pyruvate kinase, muscle pseudogene                                                                                |
| 339778    | C2orf70      | chromosome 2 open reading frame 70                                                                                |
| 348825    | TPRXL        | tetra-peptide repeat homeobox-like                                                                                |
| 221016    | CCDC7        | coiled-coil domain containing 7                                                                                   |
| 647034    | RPS14P10     | ribosomal protein S14 pseudogene 10                                                                               |
| 3805      | KIR2DL4      | killer cell immunoglobulin-like receptor, two domains, long cytoplasmic tail, 4                                   |
| 283314    | MATL2963     | hypothetical LOC283314                                                                                            |
| 7380      | UPK3A        | uroplakin 3A                                                                                                      |
| 408029    | C2orf27B     | chromosome 2 open reading frame 27B                                                                               |
| 10461     | MERTK        | c-mer proto-oncogene tyrosine kinase                                                                              |
| 642677    | LOC642677    | family with sequence similarity 154, member B pseudogene                                                          |
| 10877     | CFHR4        | complement factor H-related 4                                                                                     |
| 283571    | PROX2        | prospero homeobox 2                                                                                               |
| 340547    | VSIG1        | V-set and immunoglobulin domain containing 1                                                                      |
| 100129915 | [No Symbol]  | [No Name]                                                                                                         |
| 3426      | CFI          | complement factor I                                                                                               |
| 51499     | TRIAP1       | TP53 regulated inhibitor of apoptosis 1                                                                           |
| 780813    | PAICSP4      | phosphoribosylaminoimidazole carboxylase, phosphoribosylaminoimidazole succinocarboxamide synthetase pseudogene 4 |
| 728707    | [No Symbol]  | [No Name]                                                                                                         |
| 130813    | C2orf50      | chromosome 2 open reading frame 50                                                                                |
| 100132310 | LOC100132310 | FCF1 small subunit (SSU) processome component homolog ( <i>S. cerevisiae</i> ) pseudogene                         |
| 729486    | IL9RP3       | interleukin 9 receptor pseudogene 3                                                                               |
| 401433    | LOC401433    | hypothetical LOC401433                                                                                            |
| 286122    | C8orf31      | chromosome 8 open reading frame 31                                                                                |
| 219902    | TMEM136      | transmembrane protein 136                                                                                         |
| 199713    | NLRP7        | NLR family, pyrin domain containing 7                                                                             |
| 390282    | LOC390282    | eukaryotic translation initiation factor 3, subunit F pseudogene                                                  |
| 1769      | DNAH8        | dynein, axonemal, heavy chain 8                                                                                   |
| 100130249 | PP2672       | hypothetical LOC100130249                                                                                         |
| 163778    | SPRR4        | small proline-rich protein 4                                                                                      |
| 148641    | SLC35F3      | solute carrier family 35, member F3                                                                               |

|           |              |                                                                                               |
|-----------|--------------|-----------------------------------------------------------------------------------------------|
| 400347    | LOC400347    | REX4, RNA exonuclease 4 homolog ( <i>S. cerevisiae</i> ) pseudogene                           |
| 347333    | KRT8P14      | keratin 8 pseudogene 14                                                                       |
| 100128646 | RPL10AP7     | ribosomal protein L10a pseudogene 7                                                           |
| 54035     | PSMD4P1      | proteasome (prosome, macropain) 26S subunit, non-ATPase, 4 pseudogene 1                       |
| 8228      | PNPLA4       | patatin-like phospholipase domain containing 4                                                |
| 9363      | RAB33A       | RAB33A, member RAS oncogene family                                                            |
| 344887    | LOC344887    | NmrA-like family domain containing 1 pseudogene                                               |
| 121270    | OR11M1P      | olfactory receptor, family 11, subfamily M, member 1 pseudogene                               |
| 339736    | AK2P2        | adenylate kinase 2 pseudogene 2                                                               |
| 6461      | SHB          | Src homology 2 domain containing adaptor protein B                                            |
| 4744      | NEFH         | neurofilament, heavy polypeptide                                                              |
| 90499     | LOC90499     | hypothetical protein LOC90499                                                                 |
| 729041    | LOC729041    | fatty-acid amide hydrolase 1-like                                                             |
| 2335      | FN1          | fibronectin 1                                                                                 |
| 79625     | C4orf31      | chromosome 4 open reading frame 31                                                            |
| 644915    | METTL15P2    | methyltransferase like 15 pseudogene 2                                                        |
| 100132086 | LOC100132086 | adenylate kinase isoenzyme 6-like                                                             |
| 2596      | GAP43        | growth associated protein 43                                                                  |
| 326617    | PSMA3P       | proteasome (prosome, macropain) subunit, alpha type, 3 pseudogene                             |
| 646576    | LOC646576    | hypothetical LOC646576                                                                        |
| 3812      | KIR3DL2      | killer cell immunoglobulin-like receptor, three domains, long cytoplasmic tail, 2             |
| 100129958 | KRT8P44      | keratin 8 pseudogene 44                                                                       |
| 644662    | LOC644662    | hypothetical protein LOC644662                                                                |
| 5054      | SERPINE1     | serpin peptidase inhibitor, clade E (nexin, plasminogen activator inhibitor type 1), member 1 |
| 339983    | NAT8L        | N-acetyltransferase 8-like (GCN5-related, putative)                                           |
| 100037267 | LOC100037267 | developmental pluripotency associated 4 pseudogene                                            |
| 130013    | ACMSD        | aminocarboxymuconate semialdehyde decarboxylase                                               |
| 219623    | TMEM26       | transmembrane protein 26                                                                      |
| 9241      | NOG          | noggin                                                                                        |
| 100128050 | LOC100128050 | WD repeat domain 77 pseudogene                                                                |
| 440603    | BCL2L15      | BCL2-like 15                                                                                  |
| 152078    | C3orf55      | chromosome 3 open reading frame 55                                                            |
| 201895    | C4orf34      | chromosome 4 open reading frame 34                                                            |

|           |              |                                                                            |
|-----------|--------------|----------------------------------------------------------------------------|
| 100127889 | C10orf131    | chromosome 10 open reading frame 131                                       |
| 221711    | SYCP2L       | synaptonemal complex protein 2-like                                        |
| 8829      | NRP1         | neuropilin 1                                                               |
| 1472      | CST4         | cystatin S                                                                 |
| 729451    | LOC729451    | hypothetical protein LOC729451                                             |
| 100128389 | [No Symbol]  | [No Name]                                                                  |
| 201798    | TIGD4        | tigger transposable element derived 4                                      |
| 118663    | BTBD16       | BTB (POZ) domain containing 16                                             |
| 6887      | TAL2         | T-cell acute lymphocytic leukemia 2                                        |
| 64410     | KLHL25       | kelch-like 25 (Drosophila)                                                 |
| 442524    | DPY19L2P3    | dpy-19-like 2 pseudogene 3 (C. elegans)                                    |
| 259286    | TAS2R40      | taste receptor, type 2, member 40                                          |
| 731039    | [No Symbol]  | [No Name]                                                                  |
| 50835     | TAS2R9       | taste receptor, type 2, member 9                                           |
| 4157      | MC1R         | melanocortin 1 receptor (alpha melanocyte stimulating hormone receptor)    |
| 401703    | LOC401703    | splicing factor U2AF 35 kDa subunit-like                                   |
| 785       | CACNB4       | calcium channel, voltage-dependent, beta 4 subunit                         |
| 100130268 | LOC100130268 | similar to hCG1648866                                                      |
| 100130859 | [No Symbol]  | [No Name]                                                                  |
| 100128457 | LOC100128457 | similar to hCG2026341                                                      |
| 100132214 | [No Symbol]  | [No Name]                                                                  |
| 26        | ABP1         | amiloride binding protein 1 (amine oxidase (copper-containing))            |
| 51676     | ASB2         | ankyrin repeat and SOCS box containing 2                                   |
| 27145     | FILIP1       | filamin A interacting protein 1                                            |
| 347051    | SLC10A5      | solute carrier family 10 (sodium/bile acid cotransporter family), member 5 |
| 100131819 | [No Symbol]  | [No Name]                                                                  |
| 728780    | ANKDD1B      | ankyrin repeat and death domain containing 1B                              |
