# Supplementary material for: Gene-expression patterns in peripheral blood classify familial breast cancer susceptibility
Source: PubMed Central journal article supplement (PMC4634735; doi:10.1186/s12920-015-0145-6), 2015-11-04
Supplement: 12920_2015_145_MOESM10_ESM.pdf [file 12920_2015_145_MOESM10_ESM.pdf]

| Entrez Gene ID | Gene Symbol   | Gene Name                                                              |
|----------------|---------------|------------------------------------------------------------------------|
| 4675           | NAP1L3        | nucleosome assembly protein 1-like 3                                   |
| 5769           | PTP4A2P2      | protein tyrosine phosphatase type IVA, member 2 pseudogene 2           |
| 390980         | ZNF805        | zinc finger protein 805                                                |
| 161291         | TMEM30B       | transmembrane protein 30B                                              |
| 400360         | C15orf54      | chromosome 15 open reading frame 54                                    |
| 959            | CD40LG        | CD40 ligand                                                            |
| 11123          | RCAN3         | RCAN family member 3                                                   |
| 56985          | C17orf48      | chromosome 17 open reading frame 48                                    |
| 9840           | KIAA0748      | KIAA0748                                                               |
| 6920           | TCEA3         | transcription elongation factor A (SII), 3                             |
| 258010         | SVIP          | small VCP/p97-interacting protein                                      |
| 158399         | ZNF483        | zinc finger protein 483                                                |
| 57191          | VN1R1         | vomeronasal 1 receptor 1                                               |
| 3957           | LGALS2        | lectin, galactoside-binding, soluble, 2                                |
| 643162         | DKFZP779L1853 | hypothetical LOC643162                                                 |
| 5920           | RARRES3       | retinoic acid receptor responder (tazarotene induced) 3                |
| 92106          | OXNAD1        | oxidoreductase NAD-binding domain containing 1                         |
| 51301          | GCNT4         | glucosaminyl (N-acetyl) transferase 4, core 2                          |
| 340554         | ZC3H12B       | zinc finger CCCH-type containing 12B                                   |
| 322            | APBB1         | amyloid beta (A4) precursor protein-binding, family B, member 1 (Fe65) |
| 100132760      | [No Symbol]   | [No Name]                                                              |
| 9241           | NOG           | noggin                                                                 |
| 1823           | DSC1          | desmocollin 1                                                          |
| 56271          | BEX4          | brain expressed, X-linked 4                                            |
| 552            | AVPR1A        | arginine vasopressin receptor 1A                                       |
| 439949         | LOC439949     | hypothetical LOC439949                                                 |
| 100131733      | LOC100131733  | hypothetical LOC100131733                                              |
| 147727         | LOC147727     | hypothetical LOC147727                                                 |
| 8797           | TNFRSF10A     | tumor necrosis factor receptor superfamily, member 10a                 |
| 91624          | NEXN          | nexilin (F actin binding protein)                                      |
| 54033          | RBM11         | RNA binding motif protein 11                                           |
| 7695           | ZNF136        | zinc finger protein 136                                                |
| 100101405      | LOC100101405  | chromosome 4 open reading frame 43 pseudogene                          |

|           |             |                                                                        |
|-----------|-------------|------------------------------------------------------------------------|
| 3399      | ID3         | inhibitor of DNA binding 3, dominant negative helix-loop-helix protein |
| 128553    | TSHZ2       | teashirt zinc finger homeobox 2                                        |
| 5140      | PDE3B       | phosphodiesterase 3B, cGMP-inhibited                                   |
| 10778     | ZNF271      | zinc finger protein 271                                                |
| 940       | CD28        | CD28 molecule                                                          |
| 11043     | MID2        | midline 2                                                              |
| 340547    | VSIG1       | V-set and immunoglobulin domain containing 1                           |
| 321       | APBA2       | amyloid beta (A4) precursor protein-binding, family A, member 2        |
| 2791      | GNG11       | guanine nucleotide binding protein (G protein), gamma 11               |
| 152217    | LOC152217   | hypothetical LOC152217                                                 |
| 32        | ACACB       | acetyl-CoA carboxylase beta                                            |
| 1408      | CRY2        | cryptochrome 2 (photolyase-like)                                       |
| 55664     | CDC37L1     | cell division cycle 37 homolog ( <i>S. cerevisiae</i> )-like 1         |
| 4050      | LTB         | lymphotoxin beta (TNF superfamily, member 3)                           |
| 26119     | LDLRAP1     | low density lipoprotein receptor adaptor protein 1                     |
| 130399    | ACVR1C      | activin A receptor, type IC                                            |
| 3480      | IGF1R       | insulin-like growth factor 1 receptor                                  |
| 51176     | LEF1        | lymphoid enhancer-binding factor 1                                     |
| 55837     | EAPP        | E2F-associated phosphoprotein                                          |
| 144363    | LYRM5       | LYR motif containing 5                                                 |
| 168537    | GIMAP7      | GTPase, IMAP family member 7                                           |
| 120224    | TMEM45B     | transmembrane protein 45B                                              |
| 100128616 | [No Symbol] | [No Name]                                                              |
| 3337      | DNAJB1      | DnaJ (Hsp40) homolog, subfamily B, member 1                            |
| 645958    | RPS18P9     | ribosomal protein S18 pseudogene 9                                     |
| 7294      | TXK         | TXK tyrosine kinase                                                    |
| 7754      | ZNF204P     | zinc finger protein 204, pseudogene                                    |
| 100132341 | KIAA0664L3  | KIAA0664-like 3                                                        |
| 54851     | ANKRD49     | ankyrin repeat domain 49                                               |
| 646895    | [No Symbol] | [No Name]                                                              |
| 10179     | RBM7        | RNA binding motif protein 7                                            |
| 3655      | ITGA6       | integrin, alpha 6                                                      |
| 4054      | LTBP3       | latent transforming growth factor beta binding protein 3               |
| 113791    | PIK3IP1     | phosphoinositide-3-kinase interacting protein 1                        |
| 641518    | LOC641518   | hypothetical LOC641518                                                 |

|           |             |                                                                 |
|-----------|-------------|-----------------------------------------------------------------|
| 7381      | UQCRB       | ubiquinol-cytochrome c reductase binding protein                |
| 30061     | SLC40A1     | solute carrier family 40 (iron-regulated transporter), member 1 |
| 259215    | LY6G6F      | lymphocyte antigen 6 complex, locus G6F                         |
| 360       | AQP3        | aquaporin 3 (Gill blood group)                                  |
| 84749     | USP30       | ubiquitin specific peptidase 30                                 |
| 100133168 | GPR183P1    | G protein-coupled receptor 183 pseudogene 1                     |
| 54494     | C11orf71    | chromosome 11 open reading frame 71                             |
| 401093    | LOC401093   | hypothetical LOC401093                                          |
| 168451    | THAP5       | THAP domain containing 5                                        |
| 282997    | LOC282997   | hypothetical LOC282997                                          |
| 122525    | C14orf28    | chromosome 14 open reading frame 28                             |
| 51266     | CLEC1B      | C-type lectin domain family 1, member B                         |
| 6304      | SATB1       | SATB homeobox 1                                                 |
| 80701     | AKR1D1P1    | aldo-keto reductase family 1, member D1 pseudogene 1            |
| 2815      | GP9         | glycoprotein IX (platelet)                                      |
| 80177     | MYCT1       | myc target 1                                                    |
| 2686      | GGT7        | gamma-glutamyltransferase 7                                     |
| 100129436 | [No Symbol] | [No Name]                                                       |
| 403313    | PPAPDC2     | phosphatidic acid phosphatase type 2 domain containing 2        |
| 9925      | ZBTB5       | zinc finger and BTB domain containing 5                         |
| 7644      | ZNF91       | zinc finger protein 91                                          |
| 122773    | KLHDC1      | kelch domain containing 1                                       |
| 91782     | CHMP7       | CHMP family, member 7                                           |
| 80321     | CEP70       | centrosomal protein 70kDa                                       |
| 5125      | PCSK5       | proprotein convertase subtilisin/kexin type 5                   |
| 283897    | C16orf54    | chromosome 16 open reading frame 54                             |
| 140606    | SELM        | selenoprotein M                                                 |
| 23548     | TTC33       | tetratricopeptide repeat domain 33                              |
| 288       | ANK3        | ankyrin 3, node of Ranvier (ankyrin G)                          |
| 239       | ALOX12      | arachidonate 12-lipoxygenase                                    |
| 120776    | OR2D2       | olfactory receptor, family 2, subfamily D, member 2             |
| 687       | KLF9        | Kruppel-like factor 9                                           |
| 163778    | SPRR4       | small proline-rich protein 4                                    |
| 3081      | HGD         | homogentisate 1,2-dioxygenase                                   |
| 79048     | SECISBP2    | SECIS binding protein 2                                         |

|           |              |                                                                     |
|-----------|--------------|---------------------------------------------------------------------|
| 2811      | GP1BA        | glycoprotein Ib (platelet), alpha polypeptide                       |
| 644693    | [No Symbol]  | [No Name]                                                           |
| 199746    | U2AF1L4      | U2 small nuclear RNA auxiliary factor 1-like 4                      |
| 100128457 | LOC100128457 | similar to hCG2026341                                               |
| 100129866 | LOC100129866 | etoposide induced 2.4 mRNA pseudogene                               |
| 1236      | CCR7         | chemokine (C-C motif) receptor 7                                    |
| 29851     | ICOS         | inducible T-cell co-stimulator                                      |
| 84850     | C9orf70      | chromosome 9 open reading frame 70                                  |
| 130500    | CISD1P1      | CDGSH iron sulfur domain 1 pseudogene 1                             |
| 5578      | PRKCA        | protein kinase C, alpha                                             |
| 284391    | ZNF844       | zinc finger protein 844                                             |
| 9126      | SMC3         | structural maintenance of chromosomes 3                             |
| 5463      | POU6F1       | POU class 6 homeobox 1                                              |
| 440603    | BCL2L15      | BCL2-like 15                                                        |
| 49854     | ZNF295       | zinc finger protein 295                                             |
| 10023     | FRAT1        | frequently rearranged in advanced T-cell lymphomas                  |
| 28984     | C13orf15     | chromosome 13 open reading frame 15                                 |
| 139302    | [No Symbol]  | [No Name]                                                           |
| 129293    | C2orf89      | chromosome 2 open reading frame 89                                  |
| 100132148 | [No Symbol]  | [No Name]                                                           |
| 27134     | TJP3         | tight junction protein 3 (zona occludens 3)                         |
| 84144     | SYDE2        | synapse defective 1, Rho GTPase, homolog 2 (C. elegans)             |
| 3738      | KCNA3        | potassium voltage-gated channel, shaker-related subfamily, member 3 |
| 643058    | LOC643058    | interferon induced transmembrane protein pseudogene                 |
| 57561     | ARRDC3       | arrestin domain containing 3                                        |
| 143686    | SESN3        | sestrin 3                                                           |
| 342426    | ZNF720P1     | zinc finger protein 720 pseudogene 1                                |
| 87        | ACTN1        | actinin, alpha 1                                                    |
| 400347    | LOC400347    | REX4, RNA exonuclease 4 homolog (S. cerevisiae) pseudogene          |
| 5440      | POLR2K       | polymerase (RNA) II (DNA directed) polypeptide K, 7.0kDa            |
| 401303    | ZNF815       | zinc finger protein 815                                             |
| 55831     | TMEM111      | transmembrane protein 111                                           |
| 643723    | LOC643723    | hypothetical LOC643723                                              |
| 80741     | LY6G5C       | lymphocyte antigen 6 complex, locus G5C                             |
| 113878    | DTX2         | deltex homolog 2 (Drosophila)                                       |

|           |              |                                                                                       |
|-----------|--------------|---------------------------------------------------------------------------------------|
| 64407     | RGS18        | regulator of G-protein signaling 18                                                   |
| 57605     | PITPNM2      | phosphatidylinositol transfer protein, membrane-associated 2                          |
| 23086     | EXPH5        | exophilin 5                                                                           |
| 9737      | GPRASP1      | G protein-coupled receptor associated sorting protein 1                               |
| 150864    | FAM117B      | family with sequence similarity 117, member B                                         |
| 23348     | DOCK9        | dedicator of cytokinesis 9                                                            |
| 58473     | PLEKHB1      | pleckstrin homology domain containing, family B (evectins) member 1                   |
| 3021      | H3F3B        | H3 histone, family 3B (H3.3B)                                                         |
| 260342    | BA345E19.2   | COPS8 pseudogene                                                                      |
| 100129842 | ZNF737       | zinc finger protein 737                                                               |
| 4240      | MFGE8        | milk fat globule-EGF factor 8 protein                                                 |
| 80764     | THAP7        | THAP domain containing 7                                                              |
| 7561      | ZNF14        | zinc finger protein 14                                                                |
| 256987    | SERINC5      | serine incorporator 5                                                                 |
| 23641     | LDOC1        | leucine zipper, down-regulated in cancer 1                                            |
| 91612     | CHURC1       | churchill domain containing 1                                                         |
| 3841      | KPNA5        | karyopherin alpha 5 (importin alpha 6)                                                |
| 442673    | TUBG1P       | tubulin, gamma 1 pseudogene                                                           |
| 3727      | JUND         | jun D proto-oncogene                                                                  |
| 100129196 | LOC100129196 | hypothetical LOC100129196                                                             |
| 51763     | INPP5K       | inositol polyphosphate-5-phosphatase K                                                |
| 8535      | CBX4         | chromobox homolog 4                                                                   |
| 51710     | ZNF44        | zinc finger protein 44                                                                |
| 123036    | TC2N         | tandem C2 domains, nuclear                                                            |
| 5742      | PTGS1        | prostaglandin-endoperoxide synthase 1 (prostaglandin G/H synthase and cyclooxygenase) |
| 6815      | STYX         | serine/threonine/tyrosine interacting protein                                         |
| 51460     | SFMBT1       | Scm-like with four mbt domains 1                                                      |
| 163859    | C1orf55      | chromosome 1 open reading frame 55                                                    |
| 900       | CCNG1        | cyclin G1                                                                             |
| 93624     | TADA2B       | transcriptional adaptor 2B                                                            |
| 1073      | CFL2         | cofilin 2 (muscle)                                                                    |
| 100128262 | LOC100128262 | hypothetical LOC100128262                                                             |
| 117283    | IP6K3        | inositol hexakisphosphate kinase 3                                                    |
| 126259    | TMIGD2       | transmembrane and immunoglobulin domain containing 2                                  |
| 401261    | FLJ38717     | FLJ38717 protein                                                                      |

|           |             |                                                                                         |
|-----------|-------------|-----------------------------------------------------------------------------------------|
| 9592      | IER2        | immediate early response 2                                                              |
| 83481     | EPPK1       | epiplakin 1                                                                             |
| 6932      | TCF7        | transcription factor 7 (T-cell specific, HMG-box)                                       |
| 91120     | ZNF682      | zinc finger protein 682                                                                 |
| 51272     | BET1L       | blocked early in transport 1 homolog ( <i>S. cerevisiae</i> )-like                      |
| 729184    | [No Symbol] | [No Name]                                                                               |
| 583       | BBS2        | Bardet-Biedl syndrome 2                                                                 |
| 9214      | FAIM3       | Fas apoptotic inhibitory molecule 3                                                     |
| 94039     | ZNF101      | zinc finger protein 101                                                                 |
| 649299    | RPL36AP51   | ribosomal protein L36a pseudogene 51                                                    |
| 64784     | CRTC3       | CREB regulated transcription coactivator 3                                              |
| 201626    | PDE12       | phosphodiesterase 12                                                                    |
| 100131944 | [No Symbol] | [No Name]                                                                               |
| 7067      | THRA        | thyroid hormone receptor, alpha                                                         |
| 25949     | SYF2        | SYF2 homolog, RNA splicing factor ( <i>S. cerevisiae</i> )                              |
| 22866     | CNKS2       | connector enhancer of kinase suppressor of Ras 2                                        |
| 7343      | UBTF        | upstream binding transcription factor, RNA polymerase I                                 |
| 90321     | ZNF766      | zinc finger protein 766                                                                 |
| 57692     | MAGEE1      | melanoma antigen family E, 1                                                            |
| 158293    | FAM120AOS   | family with sequence similarity 120A opposite strand                                    |
| 100131988 | [No Symbol] | [No Name]                                                                               |
| 93035     | PKHD1L1     | polycystic kidney and hepatic disease 1 (autosomal recessive)-like 1                    |
| 8445      | DYRK2       | dual-specificity tyrosine-(Y)-phosphorylation regulated kinase 2                        |
| 152007    | GLIPR2      | GLI pathogenesis-related 2                                                              |
| 7556      | ZNF10       | zinc finger protein 10                                                                  |
| 29083     | GTPBP8      | GTP-binding protein 8 (putative)                                                        |
| 80024     | SLC24A6     | solute carrier family 24 (sodium/potassium/calcium exchanger), member 6                 |
| 7533      | YWHAH       | tyrosine 3-monooxygenase/tryptophan 5-monooxygenase activation protein, eta polypeptide |
| 1316      | KLF6        | Kruppel-like factor 6                                                                   |
| 643689    | HNRNPA3P3   | heterogeneous nuclear ribonucleoprotein A3 pseudogene 3                                 |
| 27284     | SULT1B1     | sulfotransferase family, cytosolic, 1B, member 1                                        |
| 55073     | LRR37A4     | leucine rich repeat containing 37, member A4 (pseudogene)                               |
| 84281     | C2orf88     | chromosome 2 open reading frame 88                                                      |
| 79836     | LONRF3      | LON peptidase N-terminal domain and ring finger 3                                       |
| 4329      | ALDH6A1     | aldehyde dehydrogenase 6 family, member A1                                              |

|           |              |                                                                              |
|-----------|--------------|------------------------------------------------------------------------------|
| 78988     | MRP63        | mitochondrial ribosomal protein 63                                           |
| 5334      | PLCL1        | phospholipase C-like 1                                                       |
| 27040     | LAT          | linker for activation of T cells                                             |
| 157489    | SDAD1P1      | SDA1 domain containing 1 pseudogene 1                                        |
| 80762     | NDFIP1       | Nedd4 family interacting protein 1                                           |
| 219749    | ZNF25        | zinc finger protein 25                                                       |
| 10927     | SPIN1        | spindlin 1                                                                   |
| 5413      | 5-Sep        | septin 5                                                                     |
| 80213     | TM2D3        | TM2 domain containing 3                                                      |
| 50852     | TRAT1        | T cell receptor associated transmembrane adaptor 1                           |
| 90007     | MIDN         | midnolin                                                                     |
| 3458      | IFNG         | interferon, gamma                                                            |
| 146050    | ZSCAN29      | zinc finger and SCAN domain containing 29                                    |
| 10857     | PGRMC1       | progesterone receptor membrane component 1                                   |
| 254170    | FBXO33       | F-box protein 33                                                             |
| 55251     | PCMTD2       | protein-L-isoaspartate (D-aspartate) O-methyltransferase domain containing 2 |
| 57134     | MAN1C1       | mannosidase, alpha, class 1C, member 1                                       |
| 84872     | ZC3H10       | zinc finger CCCH-type containing 10                                          |
| 100128269 | [No Symbol]  | [No Name]                                                                    |
| 145173    | B3GALTL      | beta 1,3-galactosyltransferase-like                                          |
| 54543     | TOMM7        | translocase of outer mitochondrial membrane 7 homolog (yeast)                |
| 5816      | PVALB        | parvalbumin                                                                  |
| 55340     | GIMAP5       | GTPase, IMAP family member 5                                                 |
| 81606     | LBH          | limb bud and heart development homolog (mouse)                               |
| 6903      | TBCC         | tubulin folding cofactor C                                                   |
| 79956     | ERMP1        | endoplasmic reticulum metallopeptidase 1                                     |
| 100129956 | LOC100129956 | high mobility group nucleosomal binding domain 2 pseudogene                  |
| 449645    | SF3A3P2      | splicing factor 3a, subunit 3 pseudogene 2                                   |
| 11168     | PSIP1        | PC4 and SFRS1 interacting protein 1                                          |
| 8345      | HIST1H2BH    | histone cluster 1, H2bh                                                      |
| 22828     | SCAF8        | SR-related CTD-associated factor 8                                           |
| 440515    | ZNF506       | zinc finger protein 506                                                      |
| 57708     | MIER1        | mesoderm induction early response 1 homolog (Xenopus laevis)                 |
| 4118      | MAL          | mal, T-cell differentiation protein                                          |
| 283521    | NCRNA00282   | non-protein coding RNA 282                                                   |

|           |              |                                                                                |
|-----------|--------------|--------------------------------------------------------------------------------|
| 6232      | RPS27        | ribosomal protein S27                                                          |
| 819       | CAMLG        | calcium modulating ligand                                                      |
| 729627    | PRR23A       | proline rich 23A                                                               |
| 64805     | P2RY12       | purinergic receptor P2Y, G-protein coupled, 12                                 |
| 7035      | TFPI         | tissue factor pathway inhibitor (lipoprotein-associated coagulation inhibitor) |
| 58486     | ZBED5        | zinc finger, BED-type containing 5                                             |
| 5747      | PTK2         | PTK2 protein tyrosine kinase 2                                                 |
| 2332      | FMR1         | fragile X mental retardation 1                                                 |
| 55466     | DNAJA4       | DnaJ (Hsp40) homolog, subfamily A, member 4                                    |
| 26515     | FXC1         | fracture callus 1 homolog (rat)                                                |
| 100131308 | [No Symbol]  | [No Name]                                                                      |
| 4756      | NEO1         | neogenin 1                                                                     |
| 8365      | HIST1H4H     | histone cluster 1, H4h                                                         |
| 338390    | MRPS25P1     | mitochondrial ribosomal protein S25 pseudogene 1                               |
| 64393     | ZMAT3        | zinc finger, matrin-type 3                                                     |
| 161436    | EML5         | echinoderm microtubule associated protein like 5                               |
| 4674      | NAP1L2       | nucleosome assembly protein 1-like 2                                           |
| 1659      | DHX8         | DEAH (Asp-Glu-Ala-His) box polypeptide 8                                       |
| 145748    | LYSMD4       | LysM, putative peptidoglycan-binding, domain containing 4                      |
| 51729     | WBP11        | WW domain binding protein 11                                                   |
| 51132     | RLIM         | ring finger protein, LIM domain interacting                                    |
| 375287    | RBM43        | RNA binding motif protein 43                                                   |
| 26292     | MYCBP        | c-myc binding protein                                                          |
| 29080     | CCDC59       | coiled-coil domain containing 59                                               |
| 8988      | HSPB3        | heat shock 27kDa protein 3                                                     |
| 9976      | CLEC2B       | C-type lectin domain family 2, member B                                        |
| 5504      | PPP1R2       | protein phosphatase 1, regulatory (inhibitor) subunit 2                        |
| 5196      | PF4          | platelet factor 4                                                              |
| 100131492 | LOC100131492 | PP12901                                                                        |
| 376940    | ZC3H6        | zinc finger CCCH-type containing 6                                             |
| 51440     | HPCAL4       | hippocalcin like 4                                                             |
| 100132612 | LOC100132612 | hypothetical protein LOC100132612                                              |
| 5111      | PCNA         | proliferating cell nuclear antigen                                             |
| 441549    | CDNF         | cerebral dopamine neurotrophic factor                                          |
| 4040      | LRP6         | low density lipoprotein receptor-related protein 6                             |



|           |              |                                                                                         |
|-----------|--------------|-----------------------------------------------------------------------------------------|
| 170575    | GIMAP1       | GTPase, IMAP family member 1                                                            |
| 115024    | NT5C3L       | 5'-nucleotidase, cytosolic III-like                                                     |
| 23007     | PLCH1        | phospholipase C, eta 1                                                                  |
| 401718    | OR5BK1P      | olfactory receptor, family 5, subfamily BK, member 1 pseudogene                         |
| 84224     | NBPF3        | neuroblastoma breakpoint family, member 3                                               |
| 3300      | DNAJB2       | DnaJ (Hsp40) homolog, subfamily B, member 2                                             |
| 2053      | EPHX2        | epoxide hydrolase 2, cytoplasmic                                                        |
| 90121     | TSR2         | TSR2, 20S rRNA accumulation, homolog (S. cerevisiae)                                    |
| 5938      | RBMS1P1      | RNA binding motif, single stranded interacting protein 1 pseudogene 1                   |
| 100131366 | LOC100131366 | hypothetical LOC100131366                                                               |
| 84892     | C3orf39      | chromosome 3 open reading frame 39                                                      |
| 79088     | ZNF426       | zinc finger protein 426                                                                 |
| 81894     | SLC25A28     | solute carrier family 25, member 28                                                     |
| 1473      | CST5         | cystatin D                                                                              |
| 23507     | LRR8B        | leucine rich repeat containing 8 family, member B                                       |
| 8436      | SDPR         | serum deprivation response                                                              |
| 23484     | LEPROTL1     | leptin receptor overlapping transcript-like 1                                           |
| 643951    | [No Symbol]  | [No Name]                                                                               |
| 729687    | HMG2P25      | high mobility group nucleosomal binding domain 2 pseudogene 25                          |
| 84299     | C17orf37     | chromosome 17 open reading frame 37                                                     |
| 147837    | ZNF563       | zinc finger protein 563                                                                 |
| 79144     | PPDPF        | pancreatic progenitor cell differentiation and proliferation factor homolog (zebrafish) |
| 51237     | MZB1         | marginal zone B and B1 cell-specific protein                                            |
| 54557     | SGTB         | small glutamine-rich tetratricopeptide repeat (TPR)-containing, beta                    |
| 26092     | TOR1AIP1     | torsin A interacting protein 1                                                          |
| 100129973 | LOC100129973 | hypothetical LOC100129973                                                               |
| 374868    | ATP9B        | ATPase, class II, type 9B                                                               |
| 348158    | ACSM2B       | acyl-CoA synthetase medium-chain family member 2B                                       |
| 729076    | [No Symbol]  | [No Name]                                                                               |
| 6886      | TAL1         | T-cell acute lymphocytic leukemia 1                                                     |
| 728914    | LOC728914    | histone H3.3-like                                                                       |
| 8722      | CTSF         | cathepsin F                                                                             |
| 28429     | IGHV3-38     | immunoglobulin heavy variable 3-38 (non-functional)                                     |
| 4601      | MXI1         | MAX interactor 1                                                                        |
| 345456    | PFN3         | profilin 3                                                                              |

|           |              |                                                           |
|-----------|--------------|-----------------------------------------------------------|
| 22915     | MMRN1        | multimerin 1                                              |
| 440067    | LOC440067    | caspase-1-like                                            |
| 163259    | DENND2C      | DENN/MADD domain containing 2C                            |
| 54414     | SIAE         | sialic acid acetyltransferase                             |
| 145259    | RPSAP4       | ribosomal protein SA pseudogene 4                         |
| 100130880 | LOC100130880 | hypothetical protein LOC100130880                         |
| 55363     | HEMGN        | hemogen                                                   |
| 55070     | DET1         | de-etiolated homolog 1 (Arabidopsis)                      |
| 29058     | C20orf30     | chromosome 20 open reading frame 30                       |
| 26255     | PTTG3P       | pituitary tumor-transforming 3, pseudogene                |
| 54726     | OTUD4        | OTU domain containing 4                                   |
| 100129409 | LOC100129409 | hypothetical LOC100129409                                 |
| 1183      | CLCN4        | chloride channel 4                                        |
| 55623     | THUMPD1      | THUMP domain containing 1                                 |
| 91300     | C19orf22     | chromosome 19 open reading frame 22                       |
| 1950      | EGF          | epidermal growth factor                                   |
| 55007     | FAM118A      | family with sequence similarity 118, member A             |
| 195828    | ZNF367       | zinc finger protein 367                                   |
| 5139      | PDE3A        | phosphodiesterase 3A, cGMP-inhibited                      |
| 100132073 | LOC100132073 | cyclin B2 pseudogene                                      |
| 79842     | ZBTB3        | zinc finger and BTB domain containing 3                   |
| 100131950 | LOC100131950 | methyltransferase like 5 pseudogene                       |
| 117178    | SSX2IP       | synovial sarcoma, X breakpoint 2 interacting protein      |
| 219681    | ARMC3        | armadillo repeat containing 3                             |
| 10322     | SMYD5        | SMYD family member 5                                      |
| 83744     | ZNF484       | zinc finger protein 484                                   |
| 116068    | LYSMD3       | LysM, putative peptidoglycan-binding, domain containing 3 |
| 406891    | MIRLET7I     | microRNA let-7i                                           |
| 3384      | ICAM2        | intercellular adhesion molecule 2                         |
| 100130840 | [No Symbol]  | [No Name]                                                 |
| 390190    | OR5B2        | olfactory receptor, family 5, subfamily B, member 2       |
| 10693     | CCT6B        | chaperonin containing TCP1, subunit 6B (zeta 2)           |
| 55793     | FAM63A       | family with sequence similarity 63, member A              |
| 647115    | FLJ36848     | hypothetical LOC647115                                    |
| 121551    | BTBD11       | BTB (POZ) domain containing 11                            |

|           |              |                                                                |
|-----------|--------------|----------------------------------------------------------------|
| 442017    | LOC442017    | interferon induced transmembrane protein pseudogene            |
| 51142     | CHCHD2       | coiled-coil-helix-coiled-coil-helix domain containing 2        |
| 83695     | C12orf32     | chromosome 12 open reading frame 32                            |
| 9848      | MFAP3L       | microfibrillar-associated protein 3-like                       |
| 5469      | MED1         | mediator complex subunit 1                                     |
| 285331    | CCDC66       | coiled-coil domain containing 66                               |
| 100129472 | PTP4A1P6     | protein tyrosine phosphatase type IVA, member 1 pseudogene 6   |
| 440574    | C1orf151     | chromosome 1 open reading frame 151                            |
| 51759     | C9orf78      | chromosome 9 open reading frame 78                             |
| 93323     | HAUS8        | HAUS augmin-like complex, subunit 8                            |
| 84033     | OBSCN        | obscurin, cytoskeletal calmodulin and titin-interacting RhoGEF |
| 115752    | DIS3L        | DIS3 mitotic control homolog ( <i>S. cerevisiae</i> )-like     |
| 643       | CXCR5        | chemokine (C-X-C motif) receptor 5                             |
| 94121     | SYTL4        | synaptotagmin-like 4                                           |
| 23370     | ARHGEF18     | Rho/Rac guanine nucleotide exchange factor (GEF) 18            |
| 84779     | NAA11        | N(alpha)-acetyltransferase 11, NatA catalytic subunit          |
| 26258     | PLDN         | pallidin homolog (mouse)                                       |
| 11341     | SCRG1        | stimulator of chondrogenesis 1                                 |
| 83746     | L3MBTL2      | l(3)mbt-like 2 ( <i>Drosophila</i> )                           |
| 143888    | KDEL2        | KDEL (Lys-Asp-Glu-Leu) containing 2                            |
| 92595     | ZNF764       | zinc finger protein 764                                        |
| 8349      | HIST2H2BE    | histone cluster 2, H2be                                        |
| 84886     | C1orf198     | chromosome 1 open reading frame 198                            |
| 152006    | RNF38        | ring finger protein 38                                         |
| 254228    | FAM26E       | family with sequence similarity 26, member E                   |
| 2273      | FHL1         | four and a half LIM domains 1                                  |
| 112487    | C14orf126    | chromosome 14 open reading frame 126                           |
| 55151     | TMEM38B      | transmembrane protein 38B                                      |
| 79710     | MORC4        | MORC family CW-type zinc finger 4                              |
| 6224      | RPS20        | ribosomal protein S20                                          |
| 285636    | C5orf51      | chromosome 5 open reading frame 51                             |
| 10911     | UTS2         | urotensin 2                                                    |
| 100128469 | LOC100128469 | small nuclear ribonucleoprotein polypeptide C pseudogene       |
| 51206     | GP6          | glycoprotein VI (platelet)                                     |
| 340542    | BEX5         | brain expressed, X-linked 5                                    |

|           |              |                                                                        |
|-----------|--------------|------------------------------------------------------------------------|
| 5669      | PSG1         | pregnancy specific beta-1-glycoprotein 1                               |
| 649446    | FLJ35776     | hypothetical LOC649446                                                 |
| 8368      | HIST1H4L     | histone cluster 1, H4l                                                 |
| 254427    | C10orf47     | chromosome 10 open reading frame 47                                    |
| 26049     | FAM169A      | family with sequence similarity 169, member A                          |
| 2123      | EVI2A        | ecotropic viral integration site 2A                                    |
| 3017      | HIST1H2BD    | histone cluster 1, H2bd                                                |
| 126375    | ZNF792       | zinc finger protein 792                                                |
| 3945      | LDHB         | lactate dehydrogenase B                                                |
| 100131284 | LOC100131284 | proteasome (prosome, macropain) 26S subunit, non-ATPase, 14 pseudogene |
| 27244     | SESN1        | sestrin 1                                                              |
| 5252      | PHF1         | PHD finger protein 1                                                   |
| 4747      | NEFL         | neurofilament, light polypeptide                                       |
| 7166      | TPH1         | tryptophan hydroxylase 1                                               |
| 100130231 | LOC100130231 | similar to hCG1814455                                                  |
| 729013    | LOC729013    | hypothetical LOC729013                                                 |
| 497661    | C18orf32     | chromosome 18 open reading frame 32                                    |
| 100129502 | LOC100129502 | hypothetical protein LOC100129502                                      |
| 50486     | G0S2         | G0/G1switch 2                                                          |
| 1389      | CREBL2       | cAMP responsive element binding protein-like 2                         |
| 27316     | RBMX         | RNA binding motif protein, X-linked                                    |
| 100128339 | BCAS2P3      | breast carcinoma amplified sequence 2 pseudogene 3                     |
| 9743      | ARHGAP32     | Rho GTPase activating protein 32                                       |
| 54664     | TMEM106B     | transmembrane protein 106B                                             |
| 26995     | TRUB2        | TruB pseudouridine (psi) synthase homolog 2 (E. coli)                  |
| 23189     | KANK1        | KN motif and ankyrin repeat domains 1                                  |
| 100130218 | [No Symbol]  | [No Name]                                                              |
| 5619      | PRM1         | protamine 1                                                            |
| 8821      | INPP4B       | inositol polyphosphate-4-phosphatase, type II, 105kDa                  |
| 94274     | PPP1R14A     | protein phosphatase 1, regulatory (inhibitor) subunit 14A              |
| 84326     | C16orf13     | chromosome 16 open reading frame 13                                    |
| 728711    | [No Symbol]  | [No Name]                                                              |
| 253039    | LOC253039    | hypothetical LOC253039                                                 |
| 131118    | DNAJC19      | DnaJ (Hsp40) homolog, subfamily C, member 19                           |
| 647209    | [No Symbol]  | [No Name]                                                              |

|        |           |                                                                        |
|--------|-----------|------------------------------------------------------------------------|
| 84101  | USP44     | ubiquitin specific peptidase 44                                        |
| 29965  | C16orf5   | chromosome 16 open reading frame 5                                     |
| 163882 | CNST      | consortin, connexin sorting protein                                    |
| 9516   | LITAF     | lipopolysaccharide-induced TNF factor                                  |
| 1265   | CNN2      | calponin 2                                                             |
| 2781   | GNAZ      | guanine nucleotide binding protein (G protein), alpha z polypeptide    |
| 10235  | RASGRP2   | RAS guanyl releasing protein 2 (calcium and DAG-regulated)             |
| 11102  | RPP14     | ribonuclease P/MRP 14kDa subunit                                       |
| 2841   | GPR18     | G protein-coupled receptor 18                                          |
| 84707  | BEX2      | brain expressed X-linked 2                                             |
| 81788  | NUAK2     | NUAK family, SNF1-like kinase, 2                                       |
| 267012 | DAOA      | D-amino acid oxidase activator                                         |
| 4700   | NDUFA6    | NADH dehydrogenase (ubiquinone) 1 alpha subcomplex, 6, 14kDa           |
| 8577   | TMEFF1    | transmembrane protein with EGF-like and two follistatin-like domains 1 |
| 23221  | RHOBTB2   | Rho-related BTB domain containing 2                                    |
| 140775 | SMCR8     | Smith-Magenis syndrome chromosome region, candidate 8                  |
| 2959   | GTF2B     | general transcription factor IIB                                       |
| 10944  | C11orf58  | chromosome 11 open reading frame 58                                    |
| 10782  | ZNF274    | zinc finger protein 274                                                |
| 1816   | DRD5      | dopamine receptor D5                                                   |
| 2354   | FOSB      | FBJ murine osteosarcoma viral oncogene homolog B                       |
| 729451 | LOC729451 | hypothetical protein LOC729451                                         |
| 389023 | LOC389023 | hypothetical LOC389023                                                 |
| 1983   | EIF5      | eukaryotic translation initiation factor 5                             |
| 22877  | MLXIP     | MLX interacting protein                                                |
| 7572   | ZNF24     | zinc finger protein 24                                                 |
| 84987  | C12orf62  | chromosome 12 open reading frame 62                                    |
| 8405   | SPOP      | speckle-type POZ protein                                               |
| 642280 | ZNF876P   | zinc finger protein 876, pseudogene                                    |
| 646268 | LOC646268 | hCG1654703                                                             |
| 7048   | TGFBR2    | transforming growth factor, beta receptor II (70/80kDa)                |
| 51091  | SEPSECS   | Sep (O-phosphoserine) tRNA:Sec (selenocysteine) tRNA synthase          |
| 4956   | ODF1      | outer dense fiber of sperm tails 1                                     |
| 79758  | DHRS12    | dehydrogenase/reductase (SDR family) member 12                         |
| 9093   | DNAJA3    | DnaJ (Hsp40) homolog, subfamily A, member 3                            |

|           |              |                                                                     |
|-----------|--------------|---------------------------------------------------------------------|
| 8029      | CUBN         | cubilin (intrinsic factor-cobalamin receptor)                       |
| 93550     | ANUBL1       | AN1, ubiquitin-like, homolog (Xenopus laevis)                       |
| 10455     | ECI2         | enoyl-CoA delta isomerase 2                                         |
| 57091     | CASS4        | Cas scaffolding protein family member 4                             |
| 10472     | ZNF238       | zinc finger protein 238                                             |
| 441733    | PRKXP1       | protein kinase, X-linked, pseudogene 1                              |
| 51554     | CCRL1        | chemokine (C-C motif) receptor-like 1                               |
| 3575      | IL7R         | interleukin 7 receptor                                              |
| 100129412 | [No Symbol]  | [No Name]                                                           |
| 2882      | GPX7         | glutathione peroxidase 7                                            |
| 55766     | H2AFJ        | H2A histone family, member J                                        |
| 3009      | HIST1H1B     | histone cluster 1, H1b                                              |
| 84460     | ZMAT1        | zinc finger, matrin-type 1                                          |
| 100129969 | LOC100129969 | transmembrane protein C9orf144B pseudogene                          |
| 140735    | DYNLL2       | dynein, light chain, LC8-type 2                                     |
| 729314    | LOC729314    | putative POM121-like protein 1-like                                 |
| 121642    | ALKBH2       | alkB, alkylation repair homolog 2 (E. coli)                         |
| 168620    | BHLHA15      | basic helix-loop-helix family, member a15                           |
| 10038     | PARP2        | poly (ADP-ribose) polymerase 2                                      |
| 387990    | TOMM20L      | translocase of outer mitochondrial membrane 20 homolog (yeast)-like |
| 64282     | PAPD5        | PAP associated domain containing 5                                  |
| 100113384 | SNORD123     | small nucleolar RNA, C/D box 123                                    |
| 1397      | CRIP2        | cysteine-rich protein 2                                             |
| 199777    | ZNF626       | zinc finger protein 626                                             |
| 100129353 | [No Symbol]  | [No Name]                                                           |
| 10868     | USP20        | ubiquitin specific peptidase 20                                     |
| 6668      | SP2          | Sp2 transcription factor                                            |
| 731282    | LOC731282    | hypothetical protein LOC731282                                      |
| 8328      | GFI1B        | growth factor independent 1B transcription repressor                |
| 328       | APEX1        | APEX nuclease (multifunctional DNA repair enzyme) 1                 |
| 25801     | GCA          | granulysin, EF-hand calcium binding protein                         |
| 55297     | CCDC91       | coiled-coil domain containing 91                                    |
| 64410     | KLHL25       | kelch-like 25 (Drosophila)                                          |
| 10054     | UBA2         | ubiquitin-like modifier activating enzyme 2                         |
| 167       | CRISP1       | cysteine-rich secretory protein 1                                   |

|           |              |                                                                                             |
|-----------|--------------|---------------------------------------------------------------------------------------------|
| 389419    | [No Symbol]  | [No Name]                                                                                   |
| 407025    | MIR29B2      | microRNA 29b-2                                                                              |
| 100131662 | LOC100131662 | hypothetical LOC100131662                                                                   |
| 23085     | ERC1         | ELKS/RAB6-interacting/CAST family member 1                                                  |
| 29094     | HSPC159      | galectin-related protein                                                                    |
| 100131793 | [No Symbol]  | [No Name]                                                                                   |
| 135293    | PM20D2       | peptidase M20 domain containing 2                                                           |
| 374879    | ZNF699       | zinc finger protein 699                                                                     |
| 696       | BTN1A1       | butyrophilin, subfamily 1, member A1                                                        |
| 161502    | C15orf26     | chromosome 15 open reading frame 26                                                         |
| 79064     | TMEM223      | transmembrane protein 223                                                                   |
| 8347      | HIST1H2BC    | histone cluster 1, H2bc                                                                     |
| 1429      | CRYZ         | crystallin, zeta (quinone reductase)                                                        |
| 84541     | KBTBD8       | kelch repeat and BTB (POZ) domain containing 8                                              |
| 85443     | DCLK3        | doublecortin-like kinase 3                                                                  |
| 22876     | INPP5F       | inositol polyphosphate-5-phosphatase F                                                      |
| 57097     | PARP11       | poly (ADP-ribose) polymerase family, member 11                                              |
| 266812    | NAP1L5       | nucleosome assembly protein 1-like 5                                                        |
| 123       | PLIN2        | perilipin 2                                                                                 |
| 8330      | HIST1H2AK    | histone cluster 1, H2ak                                                                     |
| 23174     | ZCCHC14      | zinc finger, CCHC domain containing 14                                                      |
| 201229    | C17orf108    | chromosome 17 open reading frame 108                                                        |
| 6117      | RPA1         | replication protein A1, 70kDa                                                               |
| 730651    | LOC730651    | zinc finger protein 709-like                                                                |
| 100132345 | [No Symbol]  | [No Name]                                                                                   |
| 57820     | CCNB1IP1     | cyclin B1 interacting protein 1, E3 ubiquitin protein ligase                                |
| 10209     | EIF1         | eukaryotic translation initiation factor 1                                                  |
| 729992    | ST13P1       | suppression of tumorigenicity 13 (colon carcinoma) (Hsp70 interacting protein) pseudogene 1 |
| 84132     | USP42        | ubiquitin specific peptidase 42                                                             |
| 644459    | LOC644459    | BEN domain containing 3 pseudogene                                                          |
| 644397    | LOC644397    | leucine-rich repeat-containing protein 37A2-like                                            |
| 79752     | ZFAND1       | zinc finger, AN1-type domain 1                                                              |
| 729954    | [No Symbol]  | [No Name]                                                                                   |
| 225       | ABCD2        | ATP-binding cassette, sub-family D (ALD), member 2                                          |
| 93164     | HTR7P1       | 5-hydroxytryptamine (serotonin) receptor 7 pseudogene 1                                     |

|           |             |                                                                            |
|-----------|-------------|----------------------------------------------------------------------------|
| 643445    | LOC643445   | tripartite motif containing 43 pseudogene                                  |
| 4953      | ODC1        | ornithine decarboxylase 1                                                  |
| 403274    | OR5H15      | olfactory receptor, family 5, subfamily H, member 15                       |
| 22986     | SORCS3      | sortilin-related VPS10 domain containing receptor 3                        |
| 57396     | CLK4        | CDC-like kinase 4                                                          |
| 128312    | HIST3H2BB   | histone cluster 3, H2bb                                                    |
| 7693      | ZNF134      | zinc finger protein 134                                                    |
| 100131183 | HMGN2P30    | high mobility group nucleosomal binding domain 2 pseudogene 30             |
| 284546    | C1orf185    | chromosome 1 open reading frame 185                                        |
| 257160    | RNF214      | ring finger protein 214                                                    |
| 165545    | DQX1        | DEAQ box RNA-dependent ATPase 1                                            |
| 100129032 | GLYATL1P1   | glycine-N-acyltransferase-like 1 pseudogene 1                              |
| 353329    | PSIP1P1     | PC4 and SFRS1 interacting protein 1 pseudogene 1                           |
| 5892      | RAD51L3     | RAD51-like 3 ( <i>S. cerevisiae</i> )                                      |
| 401884    | MGC57346    | hypothetical LOC401884                                                     |
| 387535    | HCRP1       | hepatocellular carcinoma-related HCRP1                                     |
| 158905    | PHF10P1     | PHD finger protein 10 pseudogene 1                                         |
| 83699     | SH3BGRL2    | SH3 domain binding glutamic acid-rich protein like 2                       |
| 199834    | LCE4A       | late cornified envelope 4A                                                 |
| 79066     | METTL16     | methyltransferase like 16                                                  |
| 23111     | SPG20       | spastic paraplegia 20 (Troyer syndrome)                                    |
| 3301      | DNAJA1      | DnaJ (Hsp40) homolog, subfamily A, member 1                                |
| 55906     | ZC4H2       | zinc finger, C4H2 domain containing                                        |
| 7316      | UBC         | ubiquitin C                                                                |
| 387654    | [No Symbol] | [No Name]                                                                  |
| 646934    | LOC646934   | putative golgin subfamily A member 6D-like                                 |
| 22869     | ZNF510      | zinc finger protein 510                                                    |
| 4149      | MAX         | MYC associated factor X                                                    |
| 11080     | DNAJB4      | DnaJ (Hsp40) homolog, subfamily B, member 4                                |
| 55287     | TMEM40      | transmembrane protein 40                                                   |
| 55619     | DOCK10      | dedicator of cytokinesis 10                                                |
| 23588     | KLHDC2      | kelch domain containing 2                                                  |
| 894       | CCND2       | cyclin D2                                                                  |
| 58526     | MID1IP1     | MID1 interacting protein 1 (gastrulation specific G12 homolog (zebrafish)) |
| 9862      | MED24       | mediator complex subunit 24                                                |



|           |              |                                                                                                  |
|-----------|--------------|--------------------------------------------------------------------------------------------------|
| 79695     | GALNT12      | UDP-N-acetyl-alpha-D-galactosamine:polypeptide N-acetylgalactosaminyltransferase 12 (GalNAc-T12) |
| 267       | AMFR         | autocrine motility factor receptor                                                               |
| 9975      | NR1D2        | nuclear receptor subfamily 1, group D, member 2                                                  |
| 11128     | POLR3A       | polymerase (RNA) III (DNA directed) polypeptide A, 155kDa                                        |
| 472       | ATM          | ataxia telangiectasia mutated                                                                    |
| 81325     | OR4A18P      | olfactory receptor, family 4, subfamily A, member 18 pseudogene                                  |
| 1964      | EIF1AX       | eukaryotic translation initiation factor 1A, X-linked                                            |
| 140461    | ASB8         | ankyrin repeat and SOCS box containing 8                                                         |
| 22898     | DENND3       | DENN/MADD domain containing 3                                                                    |
| 4077      | NBR1         | neighbor of BRCA1 gene 1                                                                         |
| 58515     | SELK         | selenoprotein K                                                                                  |
| 100133015 | [No Symbol]  | [No Name]                                                                                        |
| 9360      | PPIG         | peptidylprolyl isomerase G (cyclophilin G)                                                       |
| 3434      | IFIT1        | interferon-induced protein with tetratricopeptide repeats 1                                      |
| 8336      | HIST1H2AM    | histone cluster 1, H2am                                                                          |
| 814       | CAMK4        | calcium/calmodulin-dependent protein kinase IV                                                   |
| 401152    | C4orf3       | chromosome 4 open reading frame 3                                                                |
| 25793     | FBXO7        | F-box protein 7                                                                                  |
| 55602     | CDKN2AIP     | CDKN2A interacting protein                                                                       |
| 64772     | ENGASE       | endo-beta-N-acetylglucosaminidase                                                                |
| 11320     | MGAT4A       | mannosyl (alpha-1,3-)-glycoprotein beta-1,4-N-acetylglucosaminyltransferase, isozyme A           |
| 402096    | LOC402096    | uncharacterized protein C6orf106-like                                                            |
| 27018     | NGFRAP1      | nerve growth factor receptor (TNFRSF16) associated protein 1                                     |
| 100130731 | LOC100130731 | proteasome (prosome, macropain) subunit, beta type, 1 pseudogene                                 |
| 10627     | MYL12A       | myosin, light chain 12A, regulatory, non-sarcomeric                                              |
| 1776      | DNASE1L3     | deoxyribonuclease I-like 3                                                                       |
| 728545    | [No Symbol]  | [No Name]                                                                                        |
| 54496     | PRMT7        | protein arginine methyltransferase 7                                                             |
| 728504    | [No Symbol]  | [No Name]                                                                                        |
| 9252      | RPS6KA5      | ribosomal protein S6 kinase, 90kDa, polypeptide 5                                                |
| 201931    | TMEM192      | transmembrane protein 192                                                                        |
| 84919     | PPP1R15B     | protein phosphatase 1, regulatory (inhibitor) subunit 15B                                        |
| 4013      | VWA5A        | von Willebrand factor A domain containing 5A                                                     |
| 55622     | TTC27        | tetratricopeptide repeat domain 27                                                               |
| 9572      | NR1D1        | nuclear receptor subfamily 1, group D, member 1                                                  |

|           |             |                                                                                                      |
|-----------|-------------|------------------------------------------------------------------------------------------------------|
| 5788      | PTPRC       | protein tyrosine phosphatase, receptor type, C                                                       |
| 283537    | SLC46A3     | solute carrier family 46, member 3                                                                   |
| 9342      | SNAP29      | synaptosomal-associated protein, 29kDa                                                               |
| 6124      | RPL4        | ribosomal protein L4                                                                                 |
| 151457    | LOC151457   | developmentally regulated GTP binding protein 1 pseudogene                                           |
| 646344    | LOC646344   | similar to hCG2042391                                                                                |
| 619450    | ATP6V1G1P2  | ATPase, H+ transporting, lysosomal 13kDa, V1 subunit G1 pseudogene 2                                 |
| 83640     | FAM103A1    | family with sequence similarity 103, member A1                                                       |
| 93556     | EGFEM1P     | EGF-like and EMI domain containing 1, pseudogene                                                     |
| 56919     | DHX33       | DEAH (Asp-Glu-Ala-His) box polypeptide 33                                                            |
| 100131049 | [No Symbol] | [No Name]                                                                                            |
| 26530     | OR12D1P     | olfactory receptor, family 12, subfamily D, member 1 pseudogene                                      |
| 8303      | SNN         | stannin                                                                                              |
| 51065     | RPS27L      | ribosomal protein S27-like                                                                           |
| 9468      | PCYT1B      | phosphate cytidylyltransferase 1, choline, beta                                                      |
| 9831      | ZNF623      | zinc finger protein 623                                                                              |
| 54386     | TERF2IP     | telomeric repeat binding factor 2, interacting protein                                               |
| 283876    | FLJ39639    | hypothetical protein FLJ39639                                                                        |
| 57622     | LRFN1       | leucine rich repeat and fibronectin type III domain containing 1                                     |
| 116444    | GRIN3B      | glutamate receptor, ionotropic, N-methyl-D-aspartate 3B                                              |
| 79269     | DCAF10      | DDB1 and CUL4 associated factor 10                                                                   |
| 219437    | OR5L1       | olfactory receptor, family 5, subfamily L, member 1                                                  |
| 148003    | LGALS16     | beta-galactoside-binding lectin                                                                      |
| 203286    | ANKS6       | ankyrin repeat and sterile alpha motif domain containing 6                                           |
| 100128537 | C1orf132    | chromosome 1 open reading frame 132                                                                  |
| 10606     | PAICS       | phosphoribosylaminoimidazole carboxylase, phosphoribosylaminoimidazole succinocarboxamide synthetase |
| 442215    | LOC442215   | eukaryotic translation elongation factor 1 alpha 2 pseudogene                                        |
| 58497     | PRUNE       | prune homolog (Drosophila)                                                                           |
| 59286     | UBL5        | ubiquitin-like 5                                                                                     |
| 154881    | KCTD7       | potassium channel tetramerisation domain containing 7                                                |
| 51535     | PPHLN1      | periphilin 1                                                                                         |
| 1742      | DLG4        | discs, large homolog 4 (Drosophila)                                                                  |
| 100128197 | [No Symbol] | [No Name]                                                                                            |
| 55690     | PACS1       | phosphofurin acidic cluster sorting protein 1                                                        |
| 57463     | AMIGO1      | adhesion molecule with Ig-like domain 1                                                              |

|           |              |                                                                              |
|-----------|--------------|------------------------------------------------------------------------------|
| 1123      | CHN1         | chimerin (chimaerin) 1                                                       |
| 81110     | OR11J2P      | olfactory receptor, family 11, subfamily J, member 2 pseudogene              |
| 134510    | UBLCP1       | ubiquitin-like domain containing CTD phosphatase 1                           |
| 646555    | LOC646555    | AT rich interactive domain 3B pseudogene                                     |
| 6990      | DYNLT3       | dynein, light chain, Tctex-type 3                                            |
| 7388      | UQCRH        | ubiquinol-cytochrome c reductase hinge protein                               |
| 441666    | LOC441666    | zinc finger protein 91 pseudogene                                            |
| 644303    | LOC644303    | ATP-dependent RNA helicase DDX24-like                                        |
| 2113      | ETS1         | v-ets erythroblastosis virus E26 oncogene homolog 1 (avian)                  |
| 26289     | AK5          | adenylate kinase 5                                                           |
| 54970     | TTC12        | tetratricopeptide repeat domain 12                                           |
| 7259      | TSPYL1       | TSPY-like 1                                                                  |
| 8575      | PRKRA        | protein kinase, interferon-inducible double stranded RNA dependent activator |
| 93621     | MRFAP1       | Morf4 family associated protein 1                                            |
| 10206     | TRIM13       | tripartite motif containing 13                                               |
| 79811     | SLTM         | SAFB-like, transcription modulator                                           |
| 10162     | LPCAT3       | lysophosphatidylcholine acyltransferase 3                                    |
| 284358    | MAMSTR       | MEF2 activating motif and SAP domain containing transcriptional regulator    |
| 54816     | ZNF280D      | zinc finger protein 280D                                                     |
| 9751      | SNPH         | syntaphilin                                                                  |
| 648665    | LOC648665    | hypothetical LOC648665                                                       |
| 80047     | [No Symbol]  | [No Name]                                                                    |
| 11059     | WWP1         | WW domain containing E3 ubiquitin protein ligase 1                           |
| 10329     | TMEM5        | transmembrane protein 5                                                      |
| 153364    | MBLAC2       | metallo-beta-lactamase domain containing 2                                   |
| 2947      | GSTM3        | glutathione S-transferase mu 3 (brain)                                       |
| 22984     | PDCD11       | programmed cell death 11                                                     |
| 155370    | SBDSP1       | Shwachman-Bodian-Diamond syndrome pseudogene 1                               |
| 100129482 | ZNF37BP      | zinc finger protein 37B, pseudogene                                          |
| 152118    | C3orf79      | chromosome 3 open reading frame 79                                           |
| 4064      | CD180        | CD180 molecule                                                               |
| 51669     | TMEM66       | transmembrane protein 66                                                     |
| 100132815 | LOC100132815 | hypothetical LOC100132815                                                    |
| 23157     | 6-Sep        | septin 6                                                                     |
| 6039      | RNASE6       | ribonuclease, RNase A family, k6                                             |

|           |              |                                                                     |
|-----------|--------------|---------------------------------------------------------------------|
| 373       | TRIM23       | tripartite motif containing 23                                      |
| 842       | CASP9        | caspase 9, apoptosis-related cysteine peptidase                     |
| 3007      | HIST1H1D     | histone cluster 1, H1d                                              |
| 23002     | DAAM1        | dishevelled associated activator of morphogenesis 1                 |
| 1848      | DUSP6        | dual specificity phosphatase 6                                      |
| 92806     | CENPBD1      | CENPB DNA-binding domains containing 1                              |
| 5603      | MAPK13       | mitogen-activated protein kinase 13                                 |
| 654369    | RPL37P5      | ribosomal protein L37 pseudogene 5                                  |
| 100126487 | TRNAV-UAC    | transfer RNA valine (anticodon UAC)                                 |
| 731223    | LOC731223    | hypothetical LOC731223                                              |
| 648154    | [No Symbol]  | [No Name]                                                           |
| 2814      | GP5          | glycoprotein V (platelet)                                           |
| 79640     | C22orf46     | chromosome 22 open reading frame 46                                 |
| 1880      | GPR183       | G protein-coupled receptor 183                                      |
| 729678    | LOC729678    | hypothetical LOC729678                                              |
| 51411     | BIN2         | bridging integrator 2                                               |
| 135250    | RAET1E       | retinoic acid early transcript 1E                                   |
| 9550      | ATP6V1G1     | ATPase, H <sup>+</sup> transporting, lysosomal 13kDa, V1 subunit G1 |
| 729614    | FLJ37453     | hypothetical LOC729614                                              |
| 8366      | HIST1H4B     | histone cluster 1, H4b                                              |
| 728279    | KRTAP2-2     | keratin associated protein 2-2                                      |
| 3303      | HSPA1A       | heat shock 70kDa protein 1A                                         |
| 100129203 | LOC100129203 | hypothetical LOC100129203                                           |
| 4673      | NAP1L1       | nucleosome assembly protein 1-like 1                                |
| 259173    | ALS2CL       | ALS2 C-terminal like                                                |
| 342898    | SYCN         | syncollin                                                           |
| 9221      | NOLC1        | nucleolar and coiled-body phosphoprotein 1                          |
| 54737     | MPHOSPH8     | M-phase phosphoprotein 8                                            |
| 9046      | DOK2         | docking protein 2, 56kDa                                            |
| 280658    | SSX7         | synovial sarcoma, X breakpoint 7                                    |
| 199964    | TMEM61       | transmembrane protein 61                                            |
| 25865     | PRKD2        | protein kinase D2                                                   |
| 51258     | MRPL51       | mitochondrial ribosomal protein L51                                 |
| 642852    | LOC642852    | hypothetical LOC642852                                              |
| 124274    | GPR139       | G protein-coupled receptor 139                                      |

|           |               |                                                                            |
|-----------|---------------|----------------------------------------------------------------------------|
| 85013     | TMEM128       | transmembrane protein 128                                                  |
| 286336    | FAM78A        | family with sequence similarity 78, member A                               |
| 11236     | RNF139        | ring finger protein 139                                                    |
| 84146     | ZNF644        | zinc finger protein 644                                                    |
| 9836      | LCMT2         | leucine carboxyl methyltransferase 2                                       |
| 85329     | LGALS12       | lectin, galactoside-binding, soluble, 12                                   |
| 6229      | RPS24         | ribosomal protein S24                                                      |
| 100131041 | LOC100131041  | FK506 binding protein pseudogene                                           |
| 91603     | ZNF830        | zinc finger protein 830                                                    |
| 4130      | MAP1A         | microtubule-associated protein 1A                                          |
| 79672     | FN3KRP        | fructosamine 3 kinase related protein                                      |
| 23658     | LSM5          | LSM5 homolog, U6 small nuclear RNA associated ( <i>S. cerevisiae</i> )     |
| 8681      | JMJD7-PLA2G4B | JMJD7-PLA2G4B readthrough                                                  |
| 285704    | RGMB          | RGM domain family, member B                                                |
| 100129562 | [No Symbol]   | [No Name]                                                                  |
| 359804    | MRPS29P1      | mitochondrial ribosomal protein S29 pseudogene 1                           |
| 2193      | FARSA         | phenylalanyl-tRNA synthetase, alpha subunit                                |
| 9063      | PIAS2         | protein inhibitor of activated STAT, 2                                     |
| 391119    | OR10J7P       | olfactory receptor, family 10, subfamily J, member 7 pseudogene            |
| 283507    | SUGT1P3       | suppressor of G2 allele of SKP1 ( <i>S. cerevisiae</i> ) pseudogene 3      |
| 1486      | CTBS          | chitinase, di-N-acetyl-                                                    |
| 405754    | ERVFRD-1      | endogenous retrovirus group FRD, member 1                                  |
| 10210     | TOPORS        | topoisomerase I binding, arginine/serine-rich, E3 ubiquitin protein ligase |
| 64773     | FAM113A       | family with sequence similarity 113, member A                              |
| 400652    | RPS3AP49      | ribosomal protein S3a pseudogene 49                                        |
| 4306      | NR3C2         | nuclear receptor subfamily 3, group C, member 2                            |
| 136895    | C7orf31       | chromosome 7 open reading frame 31                                         |
| 85865     | GTPBP10       | GTP-binding protein 10 (putative)                                          |
| 59348     | ZNF350        | zinc finger protein 350                                                    |
| 11319     | ECD           | ecdysoneless homolog ( <i>Drosophila</i> )                                 |
| 3111      | HLA-DOA       | major histocompatibility complex, class II, DO alpha                       |
| 57447     | NDRG2         | NDRG family member 2                                                       |
| 387647    | LOC387647     | patched domain containing 3 pseudogene                                     |
| 81794     | ADAMTS10      | ADAM metalloproteinase with thrombospondin type 1 motif, 10                |
| 79979     | TRMT2B        | TRM2 tRNA methyltransferase 2 homolog B ( <i>S. cerevisiae</i> )           |

|           |              |                                                                    |
|-----------|--------------|--------------------------------------------------------------------|
| 7090      | TLE3         | transducin-like enhancer of split 3 (E(sp1) homolog, Drosophila)   |
| 10365     | KLF2         | Kruppel-like factor 2 (lung)                                       |
| 26273     | FBXO3        | F-box protein 3                                                    |
| 643067    | LOC643067    | HORMA domain containing 1 pseudogene                               |
| 283953    | TMEM114      | transmembrane protein 114                                          |
| 8892      | EIF2B2       | eukaryotic translation initiation factor 2B, subunit 2 beta, 39kDa |
| 100132049 | RPS19P4      | ribosomal protein S19 pseudogene 4                                 |
| 8313      | AXIN2        | axin 2                                                             |
| 57587     | KIAA1430     | KIAA1430                                                           |
| 585       | BBS4         | Bardet-Biedl syndrome 4                                            |
| 727789    | RWDD1P3      | RWD domain containing 1 pseudogene 3                               |
| 84837     | C14orf128    | chromosome 14 open reading frame 128                               |
| 5924      | RASGRF2      | Ras protein-specific guanine nucleotide-releasing factor 2         |
| 645446    | LOC645446    | hypothetical LOC645446                                             |
| 100130249 | PP2672       | hypothetical LOC100130249                                          |
| 2532      | DARC         | Duffy blood group, chemokine receptor                              |
| 100133139 | RPL12P41     | ribosomal protein L12 pseudogene 41                                |
| 10534     | SSSCA1       | Sjogren syndrome/scleroderma autoantigen 1                         |
| 158983    | H2BFWT       | H2B histone family, member W, testis-specific                      |
| 100129204 | LOC100129204 | hypothetical protein LOC100129204                                  |
| 8335      | HIST1H2AB    | histone cluster 1, H2ab                                            |
| 8434      | RECK         | reversion-inducing-cysteine-rich protein with kazal motifs         |
| 85444     | LRRCC1       | leucine rich repeat and coiled-coil domain containing 1            |
| 54942     | C9orf6       | chromosome 9 open reading frame 6                                  |
| 25845     | PP7080       | hypothetical LOC25845                                              |
| 84318     | CCDC77       | coiled-coil domain containing 77                                   |
| 56257     | MEPCE        | methylphosphate capping enzyme                                     |
| 117289    | TAGAP        | T-cell activation RhoGTPase activating protein                     |
| 7536      | SF1          | splicing factor 1                                                  |
| 11345     | GABARAPL2    | GABA(A) receptor-associated protein-like 2                         |
| 54900     | LAX1         | lymphocyte transmembrane adaptor 1                                 |
| 51735     | RAPGEF6      | Rap guanine nucleotide exchange factor (GEF) 6                     |
| 29079     | MED4         | mediator complex subunit 4                                         |
| 64167     | ERAP2        | endoplasmic reticulum aminopeptidase 2                             |
| 284365    | MGC45922     | hypothetical LOC284365                                             |

|           |              |                                                                                               |
|-----------|--------------|-----------------------------------------------------------------------------------------------|
| 55860     | ACTR10       | actin-related protein 10 homolog ( <i>S. cerevisiae</i> )                                     |
| 23468     | CBX5         | chromobox homolog 5                                                                           |
| 84313     | VPS25        | vacuolar protein sorting 25 homolog ( <i>S. cerevisiae</i> )                                  |
| 221830    | TWISTNB      | TWIST neighbor                                                                                |
| 729011    | [No Symbol]  | [No Name]                                                                                     |
| 81440     | OR6R1P       | olfactory receptor, family 6, subfamily R, member 1 pseudogene                                |
| 2483      | FRG1         | FSDH region gene 1                                                                            |
| 8678      | BECN1        | beclin 1, autophagy related                                                                   |
| 100130872 | LOC100130872 | hypothetical LOC100130872                                                                     |
| 22864     | R3HDM2       | R3H domain containing 2                                                                       |
| 116984    | ARAP2        | ArfGAP with RhoGAP domain, ankyrin repeat and PH domain 2                                     |
| 400539    | FLJ27243     | FLJ27243 protein                                                                              |
| 3953      | LEPR         | leptin receptor                                                                               |
| 100132010 | [No Symbol]  | [No Name]                                                                                     |
| 158714    | [No Symbol]  | [No Name]                                                                                     |
| 6750      | SST          | somatostatin                                                                                  |
| 28976     | ACAD9        | acyl-CoA dehydrogenase family, member 9                                                       |
| 7376      | NR1H2        | nuclear receptor subfamily 1, group H, member 2                                               |
| 23168     | RTF1         | Rtf1, Paf1/RNA polymerase II complex component, homolog ( <i>S. cerevisiae</i> )              |
| 90673     | PPP1R3E      | protein phosphatase 1, regulatory (inhibitor) subunit 3E                                      |
| 8698      | S1PR4        | sphingosine-1-phosphate receptor 4                                                            |
| 84692     | CCDC54       | coiled-coil domain containing 54                                                              |
| 28951     | TRIB2        | tribbles homolog 2 ( <i>Drosophila</i> )                                                      |
| 231       | AKR1B1       | aldo-keto reductase family 1, member B1 (aldose reductase)                                    |
| 8302      | KLRC4        | killer cell lectin-like receptor subfamily C, member 4                                        |
| 5728      | PTEN         | phosphatase and tensin homolog                                                                |
| 51103     | NDUFAF1      | NADH dehydrogenase (ubiquinone) 1 alpha subcomplex, assembly factor 1                         |
| 29107     | NXT1         | NTF2-like export factor 1                                                                     |
| 387590    | psiTPTE22    | TPTE pseudogene                                                                               |
| 401251    | C6orf26      | chromosome 6 open reading frame 26                                                            |
| 50964     | SOST         | sclerostin                                                                                    |
| 8794      | TNFRSF10C    | tumor necrosis factor receptor superfamily, member 10c, decoy without an intracellular domain |
| 100129854 | LOC100129854 | arginase, type II pseudogene                                                                  |
| 7336      | UBE2V2       | ubiquitin-conjugating enzyme E2 variant 2                                                     |
| 55509     | BATF3        | basic leucine zipper transcription factor, ATF-like 3                                         |

|        |               |                                                                        |
|--------|---------------|------------------------------------------------------------------------|
| 145781 | GCOM1         | GRINL1A complex locus                                                  |
| 643072 | LOC643072     | hypothetical LOC643072                                                 |
| 90139  | TSPAN18       | tetraspanin 18                                                         |
| 643977 | FLJ32255      | hypothetical LOC643977                                                 |
| 391121 | OR10J4        | olfactory receptor, family 10, subfamily J, member 4 (gene/pseudogene) |
| 5154   | PDGFA         | platelet-derived growth factor alpha polypeptide                       |
| 391465 | LOC391465     | STIP1 homology and U-box containing protein 1 pseudogene               |
| 79614  | [No Symbol]   | [No Name]                                                              |
| 121054 | KRT18P20      | keratin 18 pseudogene 20                                               |
| 339983 | NAT8L         | N-acetyltransferase 8-like (GCN5-related, putative)                    |
| 27340  | UTP20         | UTP20, small subunit (SSU) processome component, homolog (yeast)       |
| 9792   | SERTAD2       | SERTA domain containing 2                                              |
| 126767 | AADACL3       | arylacetamide deacetylase-like 3                                       |
| 643008 | C17orf109     | chromosome 17 open reading frame 109                                   |
| 441046 | GYPELOC441046 | glucuronidase, beta pseudogene                                         |
| 3796   | KIF2A         | kinesin heavy chain member 2A                                          |
| 642635 | LOC642635     | tubulin, alpha 4a pseudogene                                           |
| 637    | BID           | BH3 interacting domain death agonist                                   |
| 6609   | SMPD1         | sphingomyelin phosphodiesterase 1, acid lysosomal                      |
| 171568 | POLR3H        | polymerase (RNA) III (DNA directed) polypeptide H (22.9kD)             |
| 284    | ANGPT1        | angiopoietin 1                                                         |
| 83719  | YPEL3         | yippee-like 3 (Drosophila)                                             |
| 1787   | TRDMT1        | tRNA aspartic acid methyltransferase 1                                 |
| 51526  | C20orf111     | chromosome 20 open reading frame 111                                   |
| 29078  | NDUFAF4       | NADH dehydrogenase (ubiquinone) 1 alpha subcomplex, assembly factor 4  |
| 339290 | LOC339290     | hypothetical LOC339290                                                 |
| 641638 | SNHG6         | small nucleolar RNA host gene 6 (non-protein coding)                   |
| 6588   | SLN           | sarcolipin                                                             |
| 730079 | [No Symbol]   | [No Name]                                                              |
| 729560 | [No Symbol]   | [No Name]                                                              |
| 196415 | C12orf77      | chromosome 12 open reading frame 77                                    |
| 255231 | MCOLN2        | mucolipin 2                                                            |
| 57599  | WDR48         | WD repeat domain 48                                                    |
| 82500  | PKP2P1        | plakophilin 2 pseudogene 1                                             |
| 197370 | NSMCE1        | non-SMC element 1 homolog ( <i>S. cerevisiae</i> )                     |



|           |             |                                                          |
|-----------|-------------|----------------------------------------------------------|
| 9610      | RIN1        | Ras and Rab interactor 1                                 |
| 301       | ANXA1       | annexin A1                                               |
| 1493      | CTLA4       | cytotoxic T-lymphocyte-associated protein 4              |
| 79888     | LPCAT1      | lysophosphatidylcholine acyltransferase 1                |
| 55108     | BSDC1       | BSD domain containing 1                                  |
| 374443    | LOC374443   | CLR pseudogene                                           |
| 4656      | MYOG        | myogenin (myogenic factor 4)                             |
| 23014     | FBXO21      | F-box protein 21                                         |
| 6289      | SAA2        | serum amyloid A2                                         |
| 503569    | FLJ35946    | hypothetical protein FLJ35946                            |
| 3298      | HSF2        | heat shock transcription factor 2                        |
| 84826     | SFT2D3      | SFT2 domain containing 3                                 |
| 91039     | DPP9        | dipeptidyl-peptidase 9                                   |
| 23131     | GPATCH8     | G patch domain containing 8                              |
| 147912    | SIX5        | SIX homeobox 5                                           |
| 729141    | LOC729141   | chromosome 18 open reading frame 25 pseudogene           |
| 127018    | LYPLAL1     | lysophospholipase-like 1                                 |
| 139818    | DOCK11      | dedicator of cytokinesis 11                              |
| 221178    | SPATA13     | spermatogenesis associated 13                            |
| 8856      | NR1I2       | nuclear receptor subfamily 1, group I, member 2          |
| 4067      | LYN         | v-yes-1 Yamaguchi sarcoma viral related oncogene homolog |
| 100131851 | [No Symbol] | [No Name]                                                |
| 8732      | RNGTT       | RNA guanylyltransferase and 5'-phosphatase               |
| 57562     | KIAA1377    | KIAA1377                                                 |
| 1203      | CLN5        | ceroid-lipofuscinosis, neuronal 5                        |
| 10600     | USP16       | ubiquitin specific peptidase 16                          |
| 2353      | FOS         | FBJ murine osteosarcoma viral oncogene homolog           |
| 57690     | TNRC6C      | trinucleotide repeat containing 6C                       |
| 1939      | EIF2D       | eukaryotic translation initiation factor 2D              |
| 26205     | GMEB2       | glucocorticoid modulatory element binding protein 2      |
| 392371    | KRT18P13    | keratin 18 pseudogene 13                                 |
| 91574     | C12orf65    | chromosome 12 open reading frame 65                      |
| 79857     | FLJ13224    | hypothetical LOC79857                                    |
| 7353      | UFD1L       | ubiquitin fusion degradation 1 like (yeast)              |
| 1107      | CHD3        | chromodomain helicase DNA binding protein 3              |

|           |              |                                                                                                                 |
|-----------|--------------|-----------------------------------------------------------------------------------------------------------------|
| 162993    | ZNF846       | zinc finger protein 846                                                                                         |
| 27031     | NPHP3        | nephronophthisis 3 (adolescent)                                                                                 |
| 51650     | MRPS33       | mitochondrial ribosomal protein S33                                                                             |
| 145389    | SLC38A6      | solute carrier family 38, member 6                                                                              |
| 394       | ARHGAP5      | Rho GTPase activating protein 5                                                                                 |
| 100131135 | LOC100131135 | methylenetetrahydrofolate dehydrogenase (NADP+ dependent) 2, methenyltetrahydrofolate cyclohydrolase pseudogene |
| 7507      | XPA          | xeroderma pigmentosum, complementation group A                                                                  |
| 7534      | YWHAZ        | tyrosine 3-monooxygenase/tryptophan 5-monooxygenase activation protein, zeta polypeptide                        |
| 286042    | FLJ10661     | family with sequence similarity 86, member A pseudogene                                                         |
| 100130240 | RPS5P2       | ribosomal protein S5 pseudogene 2                                                                               |
| 100131279 | LOC100131279 | chromosome 2 open reading frame 69 pseudogene                                                                   |
| 919       | CD247        | CD247 molecule                                                                                                  |
| 158866    | ZDHC15       | zinc finger, DHHC-type containing 15                                                                            |
| 401207    | C5orf63      | chromosome 5 open reading frame 63                                                                              |
| 340481    | ZDHC21       | zinc finger, DHHC-type containing 21                                                                            |
| 8021      | NUP214       | nucleoporin 214kDa                                                                                              |
| 400359    | C15orf53     | chromosome 15 open reading frame 53                                                                             |
| 100130912 | [No Symbol]  | [No Name]                                                                                                       |
| 25901     | CCDC28A      | coiled-coil domain containing 28A                                                                               |
| 79037     | PVRIG        | poliovirus receptor related immunoglobulin domain containing                                                    |
| 84647     | PLA2G12B     | phospholipase A2, group XIIB                                                                                    |
| 150771    | ITPRIPL1     | inositol 1,4,5-trisphosphate receptor interacting protein-like 1                                                |
| 138649    | ANKRD19P     | ankyrin repeat domain 19, pseudogene                                                                            |
| 9472      | AKAP6        | A kinase (PRKA) anchor protein 6                                                                                |
| 100128465 | IFIT6P       | interferon-induced protein with tetratricopeptide repeats 6, pseudogene                                         |
| 1032      | CDKN2D       | cyclin-dependent kinase inhibitor 2D (p19, inhibits CDK4)                                                       |
| 520       | ATP5G2P1     | ATP synthase, H+ transporting, mitochondrial Fo complex, subunit C2 (subunit 9) pseudogene 1                    |
| 57125     | PLXDC1       | plexin domain containing 1                                                                                      |
| 79314     | OR4K6P       | olfactory receptor, family 4, subfamily K, member 6 pseudogene                                                  |
| 10794     | ZNF460       | zinc finger protein 460                                                                                         |
| 539       | ATP5O        | ATP synthase, H+ transporting, mitochondrial F1 complex, O subunit                                              |
| 286101    | ZNF252       | zinc finger protein 252                                                                                         |
| 4295      | MLN          | motilin                                                                                                         |
| 619208    | C6orf225     | chromosome 6 open reading frame 225                                                                             |
| 484       | ATP1B3P1     | ATPase, Na+/K+ transporting, beta 3 pseudogene                                                                  |

|           |              |                                                                       |
|-----------|--------------|-----------------------------------------------------------------------|
| 283431    | GAS2L3       | growth arrest-specific 2 like 3                                       |
| 3162      | HMOX1        | heme oxygenase (decycling) 1                                          |
| 56616     | DIABLO       | diablo, IAP-binding mitochondrial protein                             |
| 50616     | IL22         | interleukin 22                                                        |
| 10223     | GPA33        | glycoprotein A33 (transmembrane)                                      |
| 3687      | ITGAX        | integrin, alpha X (complement component 3 receptor 4 subunit)         |
| 57111     | RAB25        | RAB25, member RAS oncogene family                                     |
| 5557      | PRIM1        | primase, DNA, polypeptide 1 (49kDa)                                   |
| 1855      | DVL1         | dishevelled, dsh homolog 1 (Drosophila)                               |
| 25915     | NDUFAF3      | NADH dehydrogenase (ubiquinone) 1 alpha subcomplex, assembly factor 3 |
| 286828    | CSN1S2AP     | casein alpha s2-like A, pseudogene                                    |
| 6647      | SOD1         | superoxide dismutase 1, soluble                                       |
| 28960     | DCPS         | decapping enzyme, scavenger                                           |
| 133619    | PRRC1        | proline-rich coiled-coil 1                                            |
| 51310     | SLC22A17     | solute carrier family 22, member 17                                   |
| 7023      | TFAP4        | transcription factor AP-4 (activating enhancer binding protein 4)     |
| 80095     | ZNF606       | zinc finger protein 606                                               |
| 6844      | VAMP2        | vesicle-associated membrane protein 2 (synaptobrevin 2)               |
| 57104     | PNPLA2       | patatin-like phospholipase domain containing 2                        |
| 442210    | LOC442210    | tubulin beta chain-like                                               |
| 6596      | HLTF         | helicase-like transcription factor                                    |
| 51361     | HOOK1        | hook homolog 1 (Drosophila)                                           |
| 6424      | SFRP4        | secreted frizzled-related protein 4                                   |
| 56648     | EIF5A2       | eukaryotic translation initiation factor 5A2                          |
| 440491    | [No Symbol]  | [No Name]                                                             |
| 151313    | FAHD2B       | fumarylacetoacetate hydrolase domain containing 2B                    |
| 392435    | LOC392435    | melanoma antigen family B, 3 pseudogene                               |
| 9587      | MAD2L1BP     | MAD2L1 binding protein                                                |
| 100127967 | LOC100127967 | hypothetical LOC100127967                                             |
| 160857    | CCDC122      | coiled-coil domain containing 122                                     |
| 7597      | ZBTB25       | zinc finger and BTB domain containing 25                              |
| 100132239 | LOC100132239 | calcium activated nucleotidase 1 pseudogene                           |
| 401537    | RPSAP49      | ribosomal protein SA pseudogene 49                                    |
| 81565     | NDEL1        | nudE nuclear distribution gene E homolog (A. nidulans)-like 1         |
| 51430     | C1orf9       | chromosome 1 open reading frame 9                                     |

|           |             |                                                                                             |
|-----------|-------------|---------------------------------------------------------------------------------------------|
| 402220    | YTHDF1P1    | YTH domain family, member 1 pseudogene 1                                                    |
| 5150      | PDE7A       | phosphodiesterase 7A                                                                        |
| 149076    | ZNF362      | zinc finger protein 362                                                                     |
| 79134     | TMEM185B    | transmembrane protein 185B                                                                  |
| 8969      | HIST1H2AG   | histone cluster 1, H2ag                                                                     |
| 84456     | L3MBTL3     | l(3)mbt-like 3 (Drosophila)                                                                 |
| 23552     | CDK20       | cyclin-dependent kinase 20                                                                  |
| 7745      | ZNF192      | zinc finger protein 192                                                                     |
| 116337    | PANX3       | pannexin 3                                                                                  |
| 646324    | LOC646324   | hypothetical LOC646324                                                                      |
| 5591      | PRKDC       | protein kinase, DNA-activated, catalytic polypeptide                                        |
| 9020      | MAP3K14     | mitogen-activated protein kinase kinase kinase 14                                           |
| 219402    | MTIF3       | mitochondrial translational initiation factor 3                                             |
| 7485      | WRB         | tryptophan rich basic protein                                                               |
| 343930    | MSGN1       | mesogenin 1                                                                                 |
| 114836    | SLAMF6      | SLAM family member 6                                                                        |
| 9993      | DGCR2       | DiGeorge syndrome critical region gene 2                                                    |
| 10992     | SF3B2       | splicing factor 3b, subunit 2, 145kDa                                                       |
| 730217    | [No Symbol] | [No Name]                                                                                   |
| 516       | ATP5G1      | ATP synthase, H <sup>+</sup> transporting, mitochondrial Fo complex, subunit C1 (subunit 9) |
| 92960     | PEX11G      | peroxisomal biogenesis factor 11 gamma                                                      |
| 7314      | UBB         | ubiquitin B                                                                                 |
| 28989     | METTL11A    | methyltransferase like 11A                                                                  |
| 80700     | UBXN6       | UBX domain protein 6                                                                        |
| 196463    | PLBD2       | phospholipase B domain containing 2                                                         |
| 146723    | C17orf77    | chromosome 17 open reading frame 77                                                         |
| 51471     | NAT8B       | N-acetyltransferase 8B (GCN5-related, putative, gene/pseudogene)                            |
| 4973      | OLR1        | oxidized low density lipoprotein (lectin-like) receptor 1                                   |
| 100128899 | RPL7L1P9    | ribosomal protein L7-like 1 pseudogene 9                                                    |
| 10913     | EDAR        | ectodysplasin A receptor                                                                    |
| 80222     | TARS2       | threonyl-tRNA synthetase 2, mitochondrial (putative)                                        |
| 57594     | HOMEZ       | homeobox and leucine zipper encoding                                                        |
| 55791     | LRIF1       | ligand dependent nuclear receptor interacting factor 1                                      |
| 440051    | KRTAP5-11   | keratin associated protein 5-11                                                             |
| 54877     | ZCCHC2      | zinc finger, CCHC domain containing 2                                                       |

|           |              |                                                                             |
|-----------|--------------|-----------------------------------------------------------------------------|
| 124961    | ZFP3         | zinc finger protein 3 homolog (mouse)                                       |
| 51427     | ZNF107       | zinc finger protein 107                                                     |
| 158219    | TTC39B       | tetratricopeptide repeat domain 39B                                         |
| 8813      | DPM1         | dolichyl-phosphate mannosyltransferase polypeptide 1, catalytic subunit     |
| 100128050 | LOC100128050 | WD repeat domain 77 pseudogene                                              |
| 64976     | MRPL40       | mitochondrial ribosomal protein L40                                         |
| 3049      | HBQ1         | hemoglobin, theta 1                                                         |
| 5253      | PHF2         | PHD finger protein 2                                                        |
| 221262    | CCDC162P     | coiled-coil domain containing 162, pseudogene                               |
| 54570     | UGT2B26P     | UDP glucuronosyltransferase 2 family, polypeptide B26 pseudogene            |
| 7486      | WRN          | Werner syndrome, RecQ helicase-like                                         |
| 390933    | LOC390933    | protein associated with topoisomerase II homolog 1 (yeast) pseudogene       |
| 140576    | S100A16      | S100 calcium binding protein A16                                            |
| 2994      | GYPB         | glycophorin B (MNS blood group)                                             |
| 7174      | TPP2         | tripeptidyl peptidase II                                                    |
| 403302    | OR8A3P       | olfactory receptor, family 8, subfamily A, member 3 pseudogene              |
| 81697     | OR2B2        | olfactory receptor, family 2, subfamily B, member 2                         |
| 55128     | TRIM68       | tripartite motif containing 68                                              |
| 3573      | IL6STP1      | interleukin 6 signal transducer (gp130, oncostatin M receptor) pseudogene 1 |
| 220112    | CTAGE3P      | CTAGE family, member 3, pseudogene                                          |
| 387723    | LOC387723    | hypothetical LOC387723                                                      |
| 11171     | STRAP        | serine/threonine kinase receptor associated protein                         |
| 9935      | MAFB         | v-maf musculoaponeurotic fibrosarcoma oncogene homolog B (avian)            |
| 7874      | USP7         | ubiquitin specific peptidase 7 (herpes virus-associated)                    |
| 3396      | ICT1         | immature colon carcinoma transcript 1                                       |
| 80223     | RAB11FIP1    | RAB11 family interacting protein 1 (class I)                                |
| 284532    | OR14A16      | olfactory receptor, family 14, subfamily A, member 16                       |
| 140738    | TMEM37       | transmembrane protein 37                                                    |
| 79654     | HECTD3       | HECT domain containing 3                                                    |
| 91947     | ARRDC4       | arrestin domain containing 4                                                |
| 6234      | RPS28        | ribosomal protein S28                                                       |
| 2012      | EMP1         | epithelial membrane protein 1                                               |
| 3087      | HHEX         | hematopoietically expressed homeobox                                        |
| 79652     | TMEM204      | transmembrane protein 204                                                   |
| 401981    | FDPSP8       | farnesyl diphosphate synthase pseudogene 8                                  |

|           |              |                                                                                            |
|-----------|--------------|--------------------------------------------------------------------------------------------|
| 5414      | 4-Sep        | septin 4                                                                                   |
| 127124    | ATP6V1G3     | ATPase, H <sup>+</sup> transporting, lysosomal 13kDa, V1 subunit G3                        |
| 10172     | ZNF256       | zinc finger protein 256                                                                    |
| 29949     | IL19         | interleukin 19                                                                             |
| 130733    | TMEM178      | transmembrane protein 178                                                                  |
| 100128135 | GVINP2       | GTPase, very large interferon inducible pseudogene 2                                       |
| 100132354 | LOC100132354 | hypothetical LOC100132354                                                                  |
| 90826     | PRMT10       | protein arginine methyltransferase 10 (putative)                                           |
| 727780    | [No Symbol]  | [No Name]                                                                                  |
| 200035    | NUDT17       | nudix (nucleoside diphosphate linked moiety X)-type motif 17                               |
| 100132060 | [No Symbol]  | [No Name]                                                                                  |
| 124512    | METTL23      | methyltransferase like 23                                                                  |
| 55364     | IMPACT       | Impact homolog (mouse)                                                                     |
| 100130079 | LOC100130079 | ret finger protein-like 4A pseudogene                                                      |
| 79723     | SUV39H2      | suppressor of variegation 3-9 homolog 2 (Drosophila)                                       |
| 23473     | CAPN7        | calpain 7                                                                                  |
| 440026    | TMEM41B      | transmembrane protein 41B                                                                  |
| 100129060 | LOC100129060 | hypothetical LOC100129060                                                                  |
| 114907    | FBXO32       | F-box protein 32                                                                           |
| 100128104 | [No Symbol]  | [No Name]                                                                                  |
| 54532     | USP53        | ubiquitin specific peptidase 53                                                            |
| 2029      | ENSA         | endosulfine alpha                                                                          |
| 5734      | PTGER4       | prostaglandin E receptor 4 (subtype EP4)                                                   |
| 54764     | ZRANB1       | zinc finger, RAN-binding domain containing 1                                               |
| 1896      | EDA          | ectodysplasin A                                                                            |
| 10169     | SERF2        | small EDRK-rich factor 2                                                                   |
| 158674    | RPSAP3       | ribosomal protein SA pseudogene 3                                                          |
| 285550    | FAM200B      | family with sequence similarity 200, member B                                              |
| 346517    | OR6V1        | olfactory receptor, family 6, subfamily V, member 1                                        |
| 644159    | LOC644159    | solute carrier family 25 (mitochondrial carrier; citrate transporter), member 1 pseudogene |
| 392132    | OR2R1P       | olfactory receptor, family 2, subfamily R, member 1, pseudogene                            |
| 399       | RHOH         | ras homolog gene family, member H                                                          |
| 51057     | WDPCP        | WD repeat containing planar cell polarity effector                                         |
| 6751      | SSTR1        | somatostatin receptor 1                                                                    |
| 10813     | UTP14A       | UTP14, U3 small nucleolar ribonucleoprotein, homolog A (yeast)                             |

|           |              |                                                                                                    |
|-----------|--------------|----------------------------------------------------------------------------------------------------|
| 2530      | FUT8         | fucosyltransferase 8 (alpha (1,6) fucosyltransferase)                                              |
| 7168      | TPM1         | tropomyosin 1 (alpha)                                                                              |
| 286550    | CYCSP46      | cytochrome c, somatic pseudogene 46                                                                |
| 81164     | OR8L1P       | olfactory receptor, family 8, subfamily L, member 1 pseudogene                                     |
| 100128709 | [No Symbol]  | [No Name]                                                                                          |
| 7678      | ZNF124       | zinc finger protein 124                                                                            |
| 55000     | TUG1         | taurine upregulated 1 (non-protein coding)                                                         |
| 23335     | WDR7         | WD repeat domain 7                                                                                 |
| 388561    | ZNF761       | zinc finger protein 761                                                                            |
| 23218     | NBEAL2       | neurobeachin-like 2                                                                                |
| 51637     | C14orf166    | chromosome 14 open reading frame 166                                                               |
| 130560    | SPATA3       | spermatogenesis associated 3                                                                       |
| 121504    | HIST4H4      | histone cluster 4, H4                                                                              |
| 23078     | KIAA0564     | KIAA0564                                                                                           |
| 11108     | PRDM4        | PR domain containing 4                                                                             |
| 4111      | MAGEA12      | melanoma antigen family A, 12                                                                      |
| 116843    | C6orf192     | chromosome 6 open reading frame 192                                                                |
| 143879    | KBTBD3       | kelch repeat and BTB (POZ) domain containing 3                                                     |
| 5264      | PHYH         | phytanoyl-CoA 2-hydroxylase                                                                        |
| 79087     | ALG12        | asparagine-linked glycosylation 12, alpha-1,6-mannosyltransferase homolog ( <i>S. cerevisiae</i> ) |
| 85453     | TSPYL5       | TSPY-like 5                                                                                        |
| 8526      | DGKE         | diacylglycerol kinase, epsilon 64kDa                                                               |
| 401337    | FLJ45974     | hypothetical LOC401337                                                                             |
| 343069    | HNRNPCL1     | heterogeneous nuclear ribonucleoprotein C-like 1                                                   |
| 9218      | VAPA         | VAMP (vesicle-associated membrane protein)-associated protein A, 33kDa                             |
| 401959    | LOC401959    | voltage-dependent anion channel 2 pseudogene                                                       |
| 730091    | LOC730091    | hypothetical LOC730091                                                                             |
| 64777     | RMND5B       | required for meiotic nuclear division 5 homolog B ( <i>S. cerevisiae</i> )                         |
| 113402    | SFT2D1       | SFT2 domain containing 1                                                                           |
| 123103    | KLHL33       | kelch-like 33 ( <i>Drosophila</i> )                                                                |
| 84527     | ZNF559       | zinc finger protein 559                                                                            |
| 170959    | ZNF431       | zinc finger protein 431                                                                            |
| 100128172 | LOC100128172 | hypothetical protein LOC100128172                                                                  |
| 643637    | GLYATL1P4    | glycine-N-acyltransferase-like 1 pseudogene 4                                                      |
| 407008    | MIR223       | microRNA 223                                                                                       |

|           |              |                                                                                   |
|-----------|--------------|-----------------------------------------------------------------------------------|
| 3996      | LLGL1        | lethal giant larvae homolog 1 (Drosophila)                                        |
| 5537      | PPP6C        | protein phosphatase 6, catalytic subunit                                          |
| 25775     | C22orf24     | chromosome 22 open reading frame 24                                               |
| 23324     | MAN2B2       | mannosidase, alpha, class 2B, member 2                                            |
| 1669      | DEFA4        | defensin, alpha 4, corticostatin                                                  |
| 100129320 | HMGB3P10     | high mobility group box 3 pseudogene 10                                           |
| 6871      | TADA2A       | transcriptional adaptor 2A                                                        |
| 7334      | UBE2N        | ubiquitin-conjugating enzyme E2N                                                  |
| 3422      | IDI1         | isopentenyl-diphosphate delta isomerase 1                                         |
| 170958    | ZNF525       | zinc finger protein 525                                                           |
| 553115    | PEF1         | penta-EF-hand domain containing 1                                                 |
| 100129292 | LOC100129292 | hypothetical protein LOC100129292                                                 |
| 139596    | UPRT         | uracil phosphoribosyltransferase (FUR1) homolog (S. cerevisiae)                   |
| 390099    | LOC390099    | MAS-related GPR, member X3 pseudogene                                             |
| 1439      | CSF2RB       | colony stimulating factor 2 receptor, beta, low-affinity (granulocyte-macrophage) |
| 140612    | ZFP28        | zinc finger protein 28 homolog (mouse)                                            |
| 1191      | CLU          | clusterin                                                                         |
| 83694     | RPS6KL1      | ribosomal protein S6 kinase-like 1                                                |
| 3070      | HELLS        | helicase, lymphoid-specific                                                       |
| 55790     | CSGALNACT1   | chondroitin sulfate N-acetylgalactosaminyltransferase 1                           |
| 153684    | LOC153684    | hypothetical LOC153684                                                            |
| 5316      | PKNOX1       | PBX/knotted 1 homeobox 1                                                          |
| 54458     | PRR13        | proline rich 13                                                                   |
| 51256     | TBC1D7       | TBC1 domain family, member 7                                                      |
| 121274    | ZNF641       | zinc finger protein 641                                                           |
| 83700     | JAM3         | junctional adhesion molecule 3                                                    |
| 153527    | ZMAT2        | zinc finger, matrin-type 2                                                        |
| 54529     | ASNSD1       | asparagine synthetase domain containing 1                                         |
| 8669      | EIF3J        | eukaryotic translation initiation factor 3, subunit J                             |
| 81230     | OR5AK1P      | olfactory receptor, family 5, subfamily AK, member 1 pseudogene                   |
| 6868      | ADAM17       | ADAM metallopeptidase domain 17                                                   |
| 26148     | C10orf12     | chromosome 10 open reading frame 12                                               |
| 5318      | PKP2         | plakophilin 2                                                                     |
| 338094    | FAM151A      | family with sequence similarity 151, member A                                     |
| 647259    | [No Symbol]  | [No Name]                                                                         |



|           |              |                                                                             |
|-----------|--------------|-----------------------------------------------------------------------------|
| 25981     | DNAH1        | dynein, axonemal, heavy chain 1                                             |
| 6617      | SNAPC1       | small nuclear RNA activating complex, polypeptide 1, 43kDa                  |
| 100129175 | LOC100129175 | hypothetical protein LOC100129175                                           |
| 346085    | GAPDHP72     | glyceraldehyde-3-phosphate dehydrogenase pseudogene 72                      |
| 8896      | BUD31        | BUD31 homolog ( <i>S. cerevisiae</i> )                                      |
| 10174     | SORBS3       | sorbin and SH3 domain containing 3                                          |
| 152101    | VENTXP4      | VENT homeobox pseudogene 4                                                  |
| 55520     | ELAC1        | elaC homolog 1 ( <i>E. coli</i> )                                           |
| 92304     | SCGB3A1      | secretoglobin, family 3A, member 1                                          |
| 84961     | FBXL20       | F-box and leucine-rich repeat protein 20                                    |
| 340146    | SLC35D3      | solute carrier family 35, member D3                                         |
| 4772      | NFATC1       | nuclear factor of activated T-cells, cytoplasmic, calcineurin-dependent 1   |
| 6771      | STARP1       | steroidogenic acute regulatory protein pseudogene 1                         |
| 6532      | SLC6A4       | solute carrier family 6 (neurotransmitter transporter, serotonin), member 4 |
| 9825      | SPATA2       | spermatogenesis associated 2                                                |
| 9849      | ZNF518A      | zinc finger protein 518A                                                    |
| 2504      | FTH1P12      | ferritin, heavy polypeptide 1 pseudogene 12                                 |
| 1728      | NQO1         | NAD(P)H dehydrogenase, quinone 1                                            |
| 10847     | SRCAP        | Snf2-related CREBBP activator protein                                       |
| 118670    | FAM24A       | family with sequence similarity 24, member A                                |
| 645218    | [No Symbol]  | [No Name]                                                                   |
| 727923    | [No Symbol]  | [No Name]                                                                   |
| 400064    | RPS4XP1      | ribosomal protein S4X pseudogene 1                                          |
| 90956     | ADCK2        | aarF domain containing kinase 2                                             |
| 152559    | PAQR3        | progesterin and adipoQ receptor family member III                           |
| 644022    | RPL22P19     | ribosomal protein L22 pseudogene 19                                         |
| 83480     | PUS3         | pseudouridylate synthase 3                                                  |
| 211       | ALAS1        | aminolevulinate, delta-, synthase 1                                         |
| 51706     | CYB5R1       | cytochrome b5 reductase 1                                                   |
| 80895     | ILKAP        | integrin-linked kinase-associated serine/threonine phosphatase              |
| 441108    | C5orf56      | chromosome 5 open reading frame 56                                          |
| 3312      | HSPA8        | heat shock 70kDa protein 8                                                  |
| 80757     | TMEM121      | transmembrane protein 121                                                   |
| 57542     | KLHDC5       | kelch domain containing 5                                                   |
| 162967    | ZNF320       | zinc finger protein 320                                                     |

|           |             |                                                                       |
|-----------|-------------|-----------------------------------------------------------------------|
| 347549    | LOC347549   | centromere protein V pseudogene                                       |
| 57232     | ZNF630      | zinc finger protein 630                                               |
| 8780      | RIOK3       | RIO kinase 3 (yeast)                                                  |
| 55303     | GIMAP4      | GTPase, IMAP family member 4                                          |
| 81689     | ISCA1       | iron-sulfur cluster assembly 1 homolog ( <i>S. cerevisiae</i> )       |
| 9465      | AKAP7       | A kinase (PRKA) anchor protein 7                                      |
| 55286     | C4orf19     | chromosome 4 open reading frame 19                                    |
| 221120    | ALKBH3      | alkB, alkylation repair homolog 3 ( <i>E. coli</i> )                  |
| 729665    | C14orf38    | chromosome 14 open reading frame 38                                   |
| 10294     | DNAJA2      | DnaJ (Hsp40) homolog, subfamily A, member 2                           |
| 402716    | RPL32P17    | ribosomal protein L32 pseudogene 17                                   |
| 6515      | SLC2A3      | solute carrier family 2 (facilitated glucose transporter), member 3   |
| 23556     | PIGN        | phosphatidylinositol glycan anchor biosynthesis, class N              |
| 57194     | ATP10A      | ATPase, class V, type 10A                                             |
| 6192      | RPS4Y1      | ribosomal protein S4, Y-linked 1                                      |
| 51621     | KLF13       | Kruppel-like factor 13                                                |
| 51524     | TMEM138     | transmembrane protein 138                                             |
| 7627      | ZNF75A      | zinc finger protein 75a                                               |
| 85441     | PRIC285     | peroxisomal proliferator-activated receptor A interacting complex 285 |
| 54800     | KLHL24      | kelch-like 24 ( <i>Drosophila</i> )                                   |
| 57653     | BDAG1       | LOC100499484-C9orf174 readthrough                                     |
| 6280      | S100A9      | S100 calcium binding protein A9                                       |
| 727941    | LOC727941   | similar to RIKEN cDNA 4930443G12                                      |
| 100128810 | [No Symbol] | [No Name]                                                             |
| 220213    | OTUD1       | OTU domain containing 1                                               |
| 84553     | C6orf168    | chromosome 6 open reading frame 168                                   |
| 6282      | S100A11     | S100 calcium binding protein A11                                      |
| 5885      | RAD21       | RAD21 homolog ( <i>S. pombe</i> )                                     |
| 132       | ADK         | adenosine kinase                                                      |
| 100128731 | OST4        | oligosaccharyltransferase 4 homolog ( <i>S. cerevisiae</i> )          |
| 84124     | ZNF394      | zinc finger protein 394                                               |
| 114904    | C1QTNF6     | C1q and tumor necrosis factor related protein 6                       |
| 442252    | KRT18P22    | keratin 18 pseudogene 22                                              |
| 388907    | RPL5P34     | ribosomal protein L5 pseudogene 34                                    |
| 8339      | HIST1H2BG   | histone cluster 1, H2bg                                               |

|           |              |                                                                        |
|-----------|--------------|------------------------------------------------------------------------|
| 4338      | MOCS2        | molybdenum cofactor synthesis 2                                        |
| 55081     | IFT57        | intraflagellar transport 57 homolog (Chlamydomonas)                    |
| 100130779 | [No Symbol]  | [No Name]                                                              |
| 100130579 | LOC100130579 | hypothetical LOC100130579                                              |
| 136051    | ZNF786       | zinc finger protein 786                                                |
| 221718    | C6orf218     | chromosome 6 open reading frame 218                                    |
| 55223     | TRIM62       | tripartite motif containing 62                                         |
| 63874     | ABHD4        | abhydrolase domain containing 4                                        |
| 93654     | ST7-AS2      | ST7 antisense RNA 2 (non-protein coding)                               |
| 79719     | AAGAB        | alpha- and gamma-adaptin binding protein                               |
| 55776     | C6orf64      | chromosome 6 open reading frame 64                                     |
| 134505    | LOC134505    | eukaryotic translation initiation factor 3 subunit K pseudogene        |
| 56300     | IL36G        | interleukin 36, gamma                                                  |
| 57120     | GOPC         | golgi-associated PDZ and coiled-coil motif containing                  |
| 64283     | RGNEF        | 190 kDa guanine nucleotide exchange factor                             |
| 8736      | MYOM1        | myomesin 1, 185kDa                                                     |
| 143098    | MPP7         | membrane protein, palmitoylated 7 (MAGUK p55 subfamily member 7)       |
| 28383     | IGHV7-27     | immunoglobulin heavy variable 7-27 (pseudogene)                        |
| 9419      | CRIPT        | cysteine-rich PDZ-binding protein                                      |
| 56683     | C21orf59     | chromosome 21 open reading frame 59                                    |
| 5576      | PRKAR2A      | protein kinase, cAMP-dependent, regulatory, type II, alpha             |
| 341333    | LOC341333    | heterogeneous nuclear ribonucleoprotein A1 pseudogene                  |
| 1446      | CSN1S1       | casein alpha s1                                                        |
| 9194      | SLC16A7      | solute carrier family 16, member 7 (monocarboxylic acid transporter 2) |
| 282808    | RAB40AL      | RAB40A, member RAS oncogene family-like                                |
| 5430      | POLR2A       | polymerase (RNA) II (DNA directed) polypeptide A, 220kDa               |
| 10933     | MORF4L1      | mortality factor 4 like 1                                              |
| 7429      | VIL1         | villin 1                                                               |
| 145567    | TTC7B        | tetratricopeptide repeat domain 7B                                     |
| 25851     | TECPR1       | tectonin beta-propeller repeat containing 1                            |
| 65010     | SLC26A6      | solute carrier family 26, member 6                                     |
| 55843     | ARHGAP15     | Rho GTPase activating protein 15                                       |
| 100129026 | [No Symbol]  | [No Name]                                                              |
| 3978      | LIG1         | ligase I, DNA, ATP-dependent                                           |
| 55088     | C10orf118    | chromosome 10 open reading frame 118                                   |

|           |             |                                                                                   |
|-----------|-------------|-----------------------------------------------------------------------------------|
| 81887     | LAS1L       | LAS1-like ( <i>S. cerevisiae</i> )                                                |
| 162137    | MGC34800    | hypothetical protein MGC34800                                                     |
| 196264    | MPZL3       | myelin protein zero-like 3                                                        |
| 1398      | CRK         | v-crk sarcoma virus CT10 oncogene homolog (avian)                                 |
| 729376    | [No Symbol] | [No Name]                                                                         |
| 29117     | BRD7        | bromodomain containing 7                                                          |
| 3937      | LCP2        | lymphocyte cytosolic protein 2 (SH2 domain containing leukocyte protein of 76kDa) |
| 10207     | INADL       | InaD-like ( <i>Drosophila</i> )                                                   |
| 58533     | SNX6        | sorting nexin 6                                                                   |
| 146542    | ZNF688      | zinc finger protein 688                                                           |
| 4598      | MVK         | mevalonate kinase                                                                 |
| 200186    | CRTC2       | CREB regulated transcription coactivator 2                                        |
| 100127897 | [No Symbol] | [No Name]                                                                         |
| 5193      | PEX12       | peroxisomal biogenesis factor 12                                                  |
| 130502    | TTC32       | tetratricopeptide repeat domain 32                                                |
| 85460     | ZNF518B     | zinc finger protein 518B                                                          |
| 285605    | DTWD2       | DTW domain containing 2                                                           |
| 253482    | [No Symbol] | [No Name]                                                                         |
| 80230     | RUFY1       | RUN and FYVE domain containing 1                                                  |
| 80264     | ZNF430      | zinc finger protein 430                                                           |
| 374491    | LOC374491   | TPTE and PTEN homologous inositol lipid phosphatase pseudogene                    |
| 6840      | SVIL        | supervillin                                                                       |
| 285025    | CCDC141     | coiled-coil domain containing 141                                                 |
| 4900      | NRGN        | neurogranin (protein kinase C substrate, RC3)                                     |
| 10131     | TRAP1       | TNF receptor-associated protein 1                                                 |
| 56987     | BBX         | bobby sox homolog ( <i>Drosophila</i> )                                           |
| 4798      | NFRKB       | nuclear factor related to kappaB binding protein                                  |
| 10982     | MAPRE2      | microtubule-associated protein, RP/EB family, member 2                            |
| 3146      | HMGB1       | high mobility group box 1                                                         |
| 5682      | PSMA1       | proteasome (prosome, macropain) subunit, alpha type, 1                            |
| 161145    | TMEM229B    | transmembrane protein 229B                                                        |
| 9677      | PPIP5K1     | diphosphoinositol pentakisphosphate kinase 1                                      |
| 170690    | ADAMTS16    | ADAM metalloproteinase with thrombospondin type 1 motif, 16                       |
| 57128     | LYRM4       | LYR motif containing 4                                                            |
| 5010      | CLDN11      | claudin 11                                                                        |

|           |              |                                                                                                   |
|-----------|--------------|---------------------------------------------------------------------------------------------------|
| 7157      | TP53         | tumor protein p53                                                                                 |
| 2794      | GNL1         | guanine nucleotide binding protein-like 1                                                         |
| 23642     | SNHG1        | small nucleolar RNA host gene 1 (non-protein coding)                                              |
| 51056     | LAP3         | leucine aminopeptidase 3                                                                          |
| 158584    | FAAH2        | fatty acid amide hydrolase 2                                                                      |
| 8467      | SMARCA5      | SWI/SNF related, matrix associated, actin dependent regulator of chromatin, subfamily a, member 5 |
| 25948     | KBTBD2       | kelch repeat and BTB (POZ) domain containing 2                                                    |
| 100130274 | LOC100130274 | coiled-coil domain containing 121-like                                                            |
| 85313     | PPIL4        | peptidylprolyl isomerase (cyclophilin)-like 4                                                     |
| 29103     | DNAJC15      | DnaJ (Hsp40) homolog, subfamily C, member 15                                                      |
| 23232     | TBC1D12      | TBC1 domain family, member 12                                                                     |
| 90273     | CEACAM21     | carcinoembryonic antigen-related cell adhesion molecule 21                                        |
| 9045      | RPL14        | ribosomal protein L14                                                                             |
| 51227     | PIGP         | phosphatidylinositol glycan anchor biosynthesis, class P                                          |
| 132719    | LOC132719    | tubulin, beta 8 pseudogene                                                                        |
| 11147     | HHLA3        | HERV-H LTR-associating 3                                                                          |
| 261729    | STEAP2       | six transmembrane epithelial antigen of the prostate 2                                            |
| 10284     | SAP18        | Sin3A-associated protein, 18kDa                                                                   |
| 1997      | ELF1         | E74-like factor 1 (ets domain transcription factor)                                               |
| 219       | ALDH1B1      | aldehyde dehydrogenase 1 family, member B1                                                        |
| 3781      | KCNN2        | potassium intermediate/small conductance calcium-activated channel, subfamily N, member 2         |
| 388818    | KRTAP26-1    | keratin associated protein 26-1                                                                   |
| 29798     | C2orf27A     | chromosome 2 open reading frame 27A                                                               |
| 390431    | OR4K2        | olfactory receptor, family 4, subfamily K, member 2                                               |
| 439954    | RPL7P37      | ribosomal protein L7 pseudogene 37                                                                |
| 5577      | PRKAR2B      | protein kinase, cAMP-dependent, regulatory, type II, beta                                         |
| 1723      | DHODH        | dihydroorotate dehydrogenase                                                                      |
| 54014     | BRWD1        | bromodomain and WD repeat domain containing 1                                                     |
| 100128127 | LOC100128127 | hypothetical LOC100128127                                                                         |
| 29068     | ZBTB44       | zinc finger and BTB domain containing 44                                                          |
| 54516     | MTRF1L       | mitochondrial translational release factor 1-like                                                 |
| 391647    | KRT18P25     | keratin 18 pseudogene 25                                                                          |
| 79346     | OR4C5        | olfactory receptor, family 4, subfamily C, member 5                                               |
| 10128     | LRPPRC       | leucine-rich PPR-motif containing                                                                 |
| 85397     | RGS8         | regulator of G-protein signaling 8                                                                |

|           |              |                                                                                              |
|-----------|--------------|----------------------------------------------------------------------------------------------|
| 654342    | LOC654342    | lymphocyte-specific protein 1 pseudogene                                                     |
| 55038     | CDCA4        | cell division cycle associated 4                                                             |
| 100128328 | [No Symbol]  | [No Name]                                                                                    |
| 643613    | [No Symbol]  | [No Name]                                                                                    |
| 8452      | CUL3         | cullin 3                                                                                     |
| 5836      | PYGL         | phosphorylase, glycogen, liver                                                               |
| 2802      | GOLGA3       | golgin A3                                                                                    |
| 64101     | LRRC4        | leucine rich repeat containing 4                                                             |
| 969       | CD69         | CD69 molecule                                                                                |
| 402415    | XKRX         | XK, Kell blood group complex subunit-related, X-linked                                       |
| 256006    | ANKRD31      | ankyrin repeat domain 31                                                                     |
| 6934      | TCF7L2       | transcription factor 7-like 2 (T-cell specific, HMG-box)                                     |
| 100131457 | LOC100131457 | solute carrier family 25 (mitochondrial carrier; citrate transporter), member 1 pseudogene   |
| 26984     | SEC22A       | SEC22 vesicle trafficking protein homolog A ( <i>S. cerevisiae</i> )                         |
| 10920     | COPS8        | COP9 constitutive photomorphogenic homolog subunit 8 ( <i>Arabidopsis</i> )                  |
| 283011    | FLJ37201     | tigger transposable element derived 2 pseudogene                                             |
| 282967    | MAPK6PS6     | mitogen-activated protein kinase 6 pseudogene 6                                              |
| 644941    | [No Symbol]  | [No Name]                                                                                    |
| 7252      | TSHB         | thyroid stimulating hormone, beta                                                            |
| 100129727 | TMED10P2     | transmembrane emp24-like trafficking protein 10 (yeast) pseudogene 2                         |
| 6006      | RHCE         | Rh blood group, CcEe antigens                                                                |
| 81027     | TUBB1        | tubulin, beta 1                                                                              |
| 389322    | LOC389322    | heterogeneous nuclear ribonucleoprotein K pseudogene                                         |
| 643641    | ZNF862       | zinc finger protein 862                                                                      |
| 100131977 | LOC100131977 | prickle homolog 1 ( <i>Drosophila</i> ) pseudogene                                           |
| 374500    | THSD1P1      | thrombospondin, type I, domain containing 1 pseudogene 1                                     |
| 100130396 | ATP5LP4      | ATP synthase, H <sup>+</sup> transporting, mitochondrial Fo complex, subunit g, pseudogene 4 |
| 7846      | TUBA1A       | tubulin, alpha 1a                                                                            |
| 23338     | PHF15        | PHD finger protein 15                                                                        |
| 79786     | KLHL36       | kelch-like 36 ( <i>Drosophila</i> )                                                          |
| 6157      | RPL27A       | ribosomal protein L27a                                                                       |
| 79098     | C1orf116     | chromosome 1 open reading frame 116                                                          |
| 55017     | C14orf119    | chromosome 14 open reading frame 119                                                         |
| 118672    | PSTK         | phosphoseryl-tRNA kinase                                                                     |
| 7541      | ZFP161       | zinc finger protein 161 homolog (mouse)                                                      |

|           |           |                                                                                  |
|-----------|-----------|----------------------------------------------------------------------------------|
| 1418      | CRYGA     | crystallin, gamma A                                                              |
| 64327     | LMBR1     | limb region 1 homolog (mouse)                                                    |
| 25992     | SNED1     | sushi, nidogen and EGF-like domains 1                                            |
| 2944      | GSTM1     | glutathione S-transferase mu 1                                                   |
| 79893     | GGNBP2    | gametogenetin binding protein 2                                                  |
| 4515      | MTCP1     | mature T-cell proliferation 1                                                    |
| 100133321 | KLF17P1   | Kruppel-like factor 17 pseudogene 1                                              |
| 79363     | RSG1      | REM2 and RAB-like small GTPase 1                                                 |
| 80201     | HKDC1     | hexokinase domain containing 1                                                   |
| 7789      | ZXDA      | zinc finger, X-linked, duplicated A                                              |
| 131149    | OTOL1     | otolin 1                                                                         |
| 6884      | TAF13     | TAF13 RNA polymerase II, TATA box binding protein (TBP)-associated factor, 18kDa |
| 57002     | C7orf36   | chromosome 7 open reading frame 36                                               |
| 5191      | PEX7      | peroxisomal biogenesis factor 7                                                  |
| 84515     | MCM8      | minichromosome maintenance complex component 8                                   |
| 643836    | ZFP62     | zinc finger protein 62 homolog (mouse)                                           |
| 55170     | PRMT6     | protein arginine methyltransferase 6                                             |
| 57835     | SLC4A5    | solute carrier family 4, sodium bicarbonate cotransporter, member 5              |
| 56172     | ANKH      | ankylosis, progressive homolog (mouse)                                           |
| 51341     | ZBTB7A    | zinc finger and BTB domain containing 7A                                         |
| 9725      | TMEM63A   | transmembrane protein 63A                                                        |
| 283130    | SLC25A45  | solute carrier family 25, member 45                                              |
| 23526     | HMHA1     | histocompatibility (minor) HA-1                                                  |
| 10124     | ARL4A     | ADP-ribosylation factor-like 4A                                                  |
| 55614     | KIF16B    | kinesin family member 16B                                                        |
| 100093630 | SNHG8     | small nucleolar RNA host gene 8 (non-protein coding)                             |
| 645668    | TUFMP1    | Tu translation elongation factor, mitochondrial pseudogene 1                     |
| 51054     | PLEKHA8P1 | pleckstrin homology domain containing, family A member 8 pseudogene 1            |
| 389120    | LOC389120 | actin, beta pseudogene                                                           |
| 1200      | TPP1      | tripeptidyl peptidase I                                                          |
| 3500      | IGHG1     | immunoglobulin heavy constant gamma 1 (G1m marker)                               |
| 7416      | VDAC1     | voltage-dependent anion channel 1                                                |
| 9804      | TOMM20    | translocase of outer mitochondrial membrane 20 homolog (yeast)                   |
| 221468    | TMEM217   | transmembrane protein 217                                                        |
| 55588     | MED29     | mediator complex subunit 29                                                      |

|           |              |                                                                                 |
|-----------|--------------|---------------------------------------------------------------------------------|
| 54820     | NDE1         | nudE nuclear distribution gene E homolog 1 (A. nidulans)                        |
| 26251     | KCNG2        | potassium voltage-gated channel, subfamily G, member 2                          |
| 79831     | JMJD5        | jumonji domain containing 5                                                     |
| 9         | NAT1         | N-acetyltransferase 1 (arylamine N-acetyltransferase)                           |
| 3726      | JUNB         | jun B proto-oncogene                                                            |
| 91975     | ZNF300       | zinc finger protein 300                                                         |
| 6880      | TAF9         | TAF9 RNA polymerase II, TATA box binding protein (TBP)-associated factor, 32kDa |
| 399512    | SLC25A35     | solute carrier family 25, member 35                                             |
| 8853      | ASAP2        | ArfGAP with SH3 domain, ankyrin repeat and PH domain 2                          |
| 27036     | SIGLEC7      | sialic acid binding Ig-like lectin 7                                            |
| 25984     | KRT23        | keratin 23 (histone deacetylase inducible)                                      |
| 114798    | SLITRK1      | SLIT and NTRK-like family, member 1                                             |
| 3916      | LAMP1        | lysosomal-associated membrane protein 1                                         |
| 8649      | LAMTOR3      | late endosomal/lysosomal adaptor, MAPK and MTOR activator 3                     |
| 6948      | TCN2         | transcobalamin II                                                               |
| 55701     | ARHGEF40     | Rho guanine nucleotide exchange factor (GEF) 40                                 |
| 8863      | PER3         | period homolog 3 (Drosophila)                                                   |
| 2180      | ACSL1        | acyl-CoA synthetase long-chain family member 1                                  |
| 143503    | OR51E1       | olfactory receptor, family 51, subfamily E, member 1                            |
| 115416    | C7orf30      | chromosome 7 open reading frame 30                                              |
| 283948    | NHLRC4       | NHL repeat containing 4                                                         |
| 5795      | PTPRJ        | protein tyrosine phosphatase, receptor type, J                                  |
| 6428      | SRSF3        | serine/arginine-rich splicing factor 3                                          |
| 442260    | RPL23AP46    | ribosomal protein L23a pseudogene 46                                            |
| 222894    | FERD3L       | Fer3-like (Drosophila)                                                          |
| 100132857 | LOC100132857 | heat shock protein 90kDa alpha (cytosolic), class B member 1 pseudogene         |
| 6812      | STXBP1       | syntaxin binding protein 1                                                      |
| 100129009 | LOC100129009 | WD repeats and SOF1 domain containing pseudogene                                |
| 100131572 | RPS27P9      | ribosomal protein S27 pseudogene 9                                              |
| 100131593 | LOC100131593 | cytokine induced protein 29 kDa pseudogene                                      |
| 22859     | LPHN1        | latrophilin 1                                                                   |
| 6628      | SNRPB        | small nuclear ribonucleoprotein polypeptides B and B1                           |
| 100129310 | RPL31P14     | ribosomal protein L31 pseudogene 14                                             |
| 166968    | MIER3        | mesoderm induction early response 1, family member 3                            |
| 151556    | GPR155       | G protein-coupled receptor 155                                                  |



|           |             |                                                                                    |
|-----------|-------------|------------------------------------------------------------------------------------|
| 255330    | C3orf46     | nucleoporin 210kDa pseudogene                                                      |
| 10544     | PROCR       | protein C receptor, endothelial                                                    |
| 55802     | DCP1A       | DCP1 decapping enzyme homolog A ( <i>S. cerevisiae</i> )                           |
| 23503     | ZFYVE26     | zinc finger, FYVE domain containing 26                                             |
| 195827    | C9orf21     | chromosome 9 open reading frame 21                                                 |
| 5837      | PYGM        | phosphorylase, glycogen, muscle                                                    |
| 142683    | ITLN2       | intelectin 2                                                                       |
| 55734     | ZFP64       | zinc finger protein 64 homolog (mouse)                                             |
| 4089      | SMAD4       | SMAD family member 4                                                               |
| 100131311 | [No Symbol] | [No Name]                                                                          |
| 10686     | CLDN16      | claudin 16                                                                         |
| 1649      | DDIT3       | DNA-damage-inducible transcript 3                                                  |
| 54549     | SDK2        | sidekick homolog 2 (chicken)                                                       |
| 285533    | RNF175      | ring finger protein 175                                                            |
| 9021      | SOCS3       | suppressor of cytokine signaling 3                                                 |
| 4599      | MX1         | myxovirus (influenza virus) resistance 1, interferon-inducible protein p78 (mouse) |
| 729251    | [No Symbol] | [No Name]                                                                          |
| 8582      | OR8B1P      | olfactory receptor, family 8, subfamily B, member 1 pseudogene                     |
| 646672    | RPL15P20    | ribosomal protein L15 pseudogene 20                                                |
| 221833    | SP8         | Sp8 transcription factor                                                           |
| 9683      | N4BP1       | NEDD4 binding protein 1                                                            |
| 8971      | H1FX        | H1 histone family, member X                                                        |
| 11264     | PXMP4       | peroxisomal membrane protein 4, 24kDa                                              |
| 441172    | FLJ46906    | hypothetical LOC441172                                                             |
| 8718      | TNFRSF25    | tumor necrosis factor receptor superfamily, member 25                              |
| 84843     | MGC15705    | hypothetical protein MGC15705                                                      |
| 84064     | HDHD2       | haloacid dehalogenase-like hydrolase domain containing 2                           |
| 6813      | STXBP2      | syntaxin binding protein 2                                                         |
| 55454     | CSGALNACT2  | chondroitin sulfate N-acetylgalactosaminyltransferase 2                            |
| 153241    | CEP120      | centrosomal protein 120kDa                                                         |
| 389257    | LRRC14B     | leucine rich repeat containing 14B                                                 |
| 10949     | HNRNPA0     | heterogeneous nuclear ribonucleoprotein A0                                         |
| 8778      | SIGLEC5     | sialic acid binding Ig-like lectin 5                                               |
| 30836     | DNTTIP2     | deoxynucleotidyltransferase, terminal, interacting protein 2                       |
| 55365     | TMEM176A    | transmembrane protein 176A                                                         |

|           |             |                                                                                              |
|-----------|-------------|----------------------------------------------------------------------------------------------|
| 139201    | LOC139201   | mitogen-activated protein kinase kinase 4 pseudogene                                         |
| 168741    | PER4        | period homolog 3 (Drosophila) pseudogene                                                     |
| 342926    | ZNF677      | zinc finger protein 677                                                                      |
| 56675     | NRIP3       | nuclear receptor interacting protein 3                                                       |
| 56474     | CTPS2       | CTP synthase II                                                                              |
| 442142    | SOX30P1     | SRY (sex determining region Y)-box 30 pseudogene 1                                           |
| 2854      | GPR32       | G protein-coupled receptor 32                                                                |
| 1198      | CLK3        | CDC-like kinase 3                                                                            |
| 345462    | ZNF879      | zinc finger protein 879                                                                      |
| 199713    | NLRP7       | NLR family, pyrin domain containing 7                                                        |
| 10717     | AP4B1       | adaptor-related protein complex 4, beta 1 subunit                                            |
| 7220      | TRPC1       | transient receptor potential cation channel, subfamily C, member 1                           |
| 26168     | SENP3       | SUMO1/sentrin/SMT3 specific peptidase 3                                                      |
| 90594     | ZNF439      | zinc finger protein 439                                                                      |
| 7132      | TNFRSF1A    | tumor necrosis factor receptor superfamily, member 1A                                        |
| 6936      | C2orf3      | chromosome 2 open reading frame 3                                                            |
| 80342     | TRAF3IP3    | TRAF3 interacting protein 3                                                                  |
| 379025    | FLJ31306    | hypothetical LOC379025                                                                       |
| 18        | ABAT        | 4-aminobutyrate aminotransferase                                                             |
| 11060     | WWP2        | WW domain containing E3 ubiquitin protein ligase 2                                           |
| 54462     | FAM190B     | family with sequence similarity 190, member B                                                |
| 79818     | ZNF552      | zinc finger protein 552                                                                      |
| 2615      | LRRC32      | leucine rich repeat containing 32                                                            |
| 100130847 | [No Symbol] | [No Name]                                                                                    |
| 7757      | ZNF208      | zinc finger protein 208                                                                      |
| 79016     | DDA1        | DET1 and DDB1 associated 1                                                                   |
| 100133044 | BCRP8       | breakpoint cluster region pseudogene 8                                                       |
| 1327      | COX4I1      | cytochrome c oxidase subunit IV isoform 1                                                    |
| 100127911 | ST13P12     | suppression of tumorigenicity 13 (colon carcinoma) (Hsp70 interacting protein) pseudogene 12 |
| 5813      | PURA        | purine-rich element binding protein A                                                        |
| 647038    | [No Symbol] | [No Name]                                                                                    |
| 6433      | SFSWAP      | splicing factor, suppressor of white-apricot homolog (Drosophila)                            |
| 54891     | INO80D      | INO80 complex subunit D                                                                      |
| 27253     | PCDH17      | protocadherin 17                                                                             |
| 220906    | LOC220906   | hypothetical LOC220906                                                                       |

|           |              |                                                                                                           |
|-----------|--------------|-----------------------------------------------------------------------------------------------------------|
| 8500      | PPFIA1       | protein tyrosine phosphatase, receptor type, f polypeptide (PTPRF), interacting protein (liprin), alpha 1 |
| 79809     | TTC21B       | tetratricopeptide repeat domain 21B                                                                       |
| 64921     | CASD1        | CAS1 domain containing 1                                                                                  |
| 6208      | RPS14        | ribosomal protein S14                                                                                     |
| 1870      | E2F2         | E2F transcription factor 2                                                                                |
| 9437      | NCR1         | natural cytotoxicity triggering receptor 1                                                                |
| 3091      | HIF1A        | hypoxia inducible factor 1, alpha subunit (basic helix-loop-helix transcription factor)                   |
| 55237     | VRTN         | vertebrae development homolog (pig)                                                                       |
| 11085     | ADAM30       | ADAM metallopeptidase domain 30                                                                           |
| 389634    | LOC389634    | hypothetical LOC389634                                                                                    |
| 100133123 | LOC100133123 | similar to hCG1809003                                                                                     |
| 541468    | C1orf190     | chromosome 1 open reading frame 190                                                                       |
| 22919     | MAPRE1       | microtubule-associated protein, RP/EB family, member 1                                                    |
| 441058    | MGC39584     | hypothetical LOC441058                                                                                    |
| 92346     | C1orf105     | chromosome 1 open reading frame 105                                                                       |
| 448834    | KPRP         | keratinocyte proline-rich protein                                                                         |
| 10370     | CITED2       | Cbp/p300-interacting transactivator, with Glu/Asp-rich carboxy-terminal domain, 2                         |
| 79894     | ZNF672       | zinc finger protein 672                                                                                   |
| 51531     | C9orf156     | chromosome 9 open reading frame 156                                                                       |
| 6142      | RPL18A       | ribosomal protein L18a                                                                                    |
| 23613     | ZMYND8       | zinc finger, MYND-type containing 8                                                                       |
| 81115     | OR7E106P     | olfactory receptor, family 7, subfamily E, member 106 pseudogene                                          |
| 79574     | EPS8L3       | EPS8-like 3                                                                                               |
| 359763    | MRPS18BP2    | mitochondrial ribosomal protein S18B pseudogene 2                                                         |
| 55274     | PHF10        | PHD finger protein 10                                                                                     |
| 646216    | LOC646216    | ribosomal protein S3a pseudogene                                                                          |
| 308       | ANXA5        | annexin A5                                                                                                |
| 390082    | OR52E5       | olfactory receptor, family 52, subfamily E, member 5                                                      |
| 10952     | SEC61B       | Sec61 beta subunit                                                                                        |
| 8772      | FADD         | Fas (TNFRSF6)-associated via death domain                                                                 |
| 5476      | CTSA         | cathepsin A                                                                                               |
| 26279     | PLA2G2D      | phospholipase A2, group IID                                                                               |
| 100132916 | FAM159B      | family with sequence similarity 159, member B                                                             |
| 340527    | NHSL2        | NHS-like 2                                                                                                |
| 114826    | SMYD4        | SET and MYND domain containing 4                                                                          |

|           |              |                                                                             |
|-----------|--------------|-----------------------------------------------------------------------------|
| 158787    | RIBC1        | RIB43A domain with coiled-coils 1                                           |
| 389435    | RPL27AP6     | ribosomal protein L27a pseudogene 6                                         |
| 50802     | IGK@         | immunoglobulin kappa locus                                                  |
| 54708     | 5-Mar        | membrane-associated ring finger (C3HC4) 5                                   |
| 646719    | LOC646719    | hypothetical LOC646719                                                      |
| 145482    | PTGR2        | prostaglandin reductase 2                                                   |
| 9263      | STK17A       | serine/threonine kinase 17a                                                 |
| 284467    | FAM19A3      | family with sequence similarity 19 (chemokine (C-C motif)-like), member A3  |
| 7364      | UGT2B7       | UDP glucuronosyltransferase 2 family, polypeptide B7                        |
| 94241     | TP53INP1     | tumor protein p53 inducible nuclear protein 1                               |
| 728509    | RPS19P7      | ribosomal protein S19 pseudogene 7                                          |
| 23271     | CAMSAP1L1    | calmodulin regulated spectrin-associated protein 1-like 1                   |
| 650157    | LOC650157    | peptidyl-prolyl cis-trans isomerase A-like                                  |
| 51290     | ERGIC2       | ERGIC and golgi 2                                                           |
| 103911    | RPS27AP1     | ribosomal protein S27a pseudogene 1                                         |
| 84287     | ZDHC16       | zinc finger, DHHC-type containing 16                                        |
| 100127886 | LOC100127886 | hypothetical LOC100127886                                                   |
| 23612     | PHLDA3       | pleckstrin homology-like domain, family A, member 3                         |
| 2289      | FKBP5        | FK506 binding protein 5                                                     |
| 100128327 | BET3L        | BET3 like ( <i>S. cerevisiae</i> )                                          |
| 84830     | C6orf105     | chromosome 6 open reading frame 105                                         |
| 79324     | OR51G1       | olfactory receptor, family 51, subfamily G, member 1                        |
| 100131789 | VN1R46P      | vomer nasal 1 receptor 46 pseudogene                                        |
| 10569     | SLU7         | SLU7 splicing factor homolog ( <i>S. cerevisiae</i> )                       |
| 119687    | OR51A7       | olfactory receptor, family 51, subfamily A, member 7                        |
| 645397    | LOC645397    | methylenetetrahydrofolate dehydrogenase (NADP+ dependent) 1-like pseudogene |
| 497049    | FLJ25758     | hypothetical locus FLJ25758                                                 |
| 145853    | C15orf61     | chromosome 15 open reading frame 61                                         |
| 391106    | VDAC1P9      | voltage-dependent anion channel 1 pseudogene 9                              |
| 1135      | CHRNA2       | cholinergic receptor, nicotinic, alpha 2 (neuronal)                         |
| 391239    | LOC391239    | V-set domain containing T cell activation inhibitor 1 pseudogene            |
| 7634      | ZNF80        | zinc finger protein 80                                                      |
| 85440     | DOCK7        | dedicator of cytokinesis 7                                                  |
| 53371     | NUP54        | nucleoporin 54kDa                                                           |
| 4809      | NHP2L1       | NHP2 non-histone chromosome protein 2-like 1 ( <i>S. cerevisiae</i> )       |

|           |              |                                                                                                      |
|-----------|--------------|------------------------------------------------------------------------------------------------------|
| 391211    | OR2G6        | olfactory receptor, family 2, subfamily G, member 6                                                  |
| 100129046 | LOC100129046 | hypothetical LOC100129046                                                                            |
| 3281      | HSBP1        | heat shock factor binding protein 1                                                                  |
| 10245     | TIMM17B      | translocase of inner mitochondrial membrane 17 homolog B (yeast)                                     |
| 26015     | RPAP1        | RNA polymerase II associated protein 1                                                               |
| 146540    | ZNF785       | zinc finger protein 785                                                                              |
| 51659     | GINS2        | GINS complex subunit 2 (Psf2 homolog)                                                                |
| 51696     | HECA         | headcase homolog (Drosophila)                                                                        |
| 57551     | TAOK1        | TAO kinase 1                                                                                         |
| 10380     | BPNT1        | 3'(2'), 5'-bisphosphate nucleotidase 1                                                               |
| 3308      | HSPA4        | heat shock 70kDa protein 4                                                                           |
| 351       | APP          | amyloid beta (A4) precursor protein                                                                  |
| 22871     | NLGN1        | neuroligin 1                                                                                         |
| 128977    | C22orf39     | chromosome 22 open reading frame 39                                                                  |
| 203259    | C9orf25      | chromosome 9 open reading frame 25                                                                   |
| 55775     | TDP1         | tyrosyl-DNA phosphodiesterase 1                                                                      |
| 2895      | GRID2        | glutamate receptor, ionotropic, delta 2                                                              |
| 84630     | TTBK1        | tau tubulin kinase 1                                                                                 |
| 83464     | APH1B        | anterior pharynx defective 1 homolog B (C. elegans)                                                  |
| 6727      | SRP14        | signal recognition particle 14kDa (homologous Alu RNA binding protein)                               |
| 100130321 | LOC100130321 | DNA fragmentation factor, 45kDa, alpha polypeptide pseudogene                                        |
| 729397    | [No Symbol]  | [No Name]                                                                                            |
| 292       | SLC25A5      | solute carrier family 25 (mitochondrial carrier; adenine nucleotide translocator), member 5          |
| 79722     | ANKRD55      | ankyrin repeat domain 55                                                                             |
| 643605    | LOC643605    | CTD (carboxy-terminal domain, RNA polymerase II, polypeptide A) small phosphatase like 2 pseudogene  |
| 3437      | IFIT3        | interferon-induced protein with tetratricopeptide repeats 3                                          |
| 9147      | NEMF         | nuclear export mediator factor                                                                       |
| 4318      | MMP9         | matrix metalloproteinase 9 (gelatinase B, 92kDa gelatinase, 92kDa type IV collagenase)               |
| 9365      | KL           | klotho                                                                                               |
| 51209     | RAB9B        | RAB9B, member RAS oncogene family                                                                    |
| 10797     | MTHFD2       | methylenetetrahydrofolate dehydrogenase (NADP+ dependent) 2, methenyltetrahydrofolate cyclohydrolase |
| 55628     | ZNF407       | zinc finger protein 407                                                                              |
| 23398     | PPWD1        | peptidylprolyl isomerase domain and WD repeat containing 1                                           |
| 646913    | SEPT7P3      | septin 7 pseudogene 3                                                                                |
| 91056     | DKFZp761E198 | DKFZp761E198 protein                                                                                 |

|           |              |                                                                                                        |
|-----------|--------------|--------------------------------------------------------------------------------------------------------|
| 11282     | MGAT4B       | mannosyl (alpha-1,3-)-glycoprotein beta-1,4-N-acetylglucosaminyltransferase, isozyme B                 |
| 55613     | MTMR8        | myotubularin related protein 8                                                                         |
| 2850      | GPR27        | G protein-coupled receptor 27                                                                          |
| 4691      | NCL          | nucleolin                                                                                              |
| 359764    | MRPS18CP3    | mitochondrial ribosomal protein S18C pseudogene 3                                                      |
| 847       | CAT          | catalase                                                                                               |
| 100129761 | LOC100129761 | adenosylmethionine decarboxylase 1 pseudogene                                                          |
| 10120     | ACTR1B       | ARP1 actin-related protein 1 homolog B, cetractin beta (yeast)                                         |
| 9597      | SMAD5-AS1    | SMAD5 antisense RNA 1 (non-protein coding)                                                             |
| 51027     | BOLA1        | bolA homolog 1 (E. coli)                                                                               |
| 337972    | KRTAP19-5    | keratin associated protein 19-5                                                                        |
| 5054      | SERPINE1     | serpin peptidase inhibitor, clade E (nexin, plasminogen activator inhibitor type 1), member 1          |
| 283600    | SLC25A47     | solute carrier family 25, member 47                                                                    |
| 79441     | HAUS3        | HAUS augmin-like complex, subunit 3                                                                    |
| 916       | CD3E         | CD3e molecule, epsilon (CD3-TCR complex)                                                               |
| 440104    | LOC440104    | 1110012D08Rik pseudogene                                                                               |
| 253959    | RALGAPA1     | Ral GTPase activating protein, alpha subunit 1 (catalytic)                                             |
| 393046    | OR2A5        | olfactory receptor, family 2, subfamily A, member 5                                                    |
| 644186    | C22orf41     | chromosome 22 open reading frame 41                                                                    |
| 80067     | DCAF17       | DDB1 and CUL4 associated factor 17                                                                     |
| 7786      | MAP3K12      | mitogen-activated protein kinase kinase kinase 12                                                      |
| 747       | DAGLA        | diacylglycerol lipase, alpha                                                                           |
| 3988      | LIPA         | lipase A, lysosomal acid, cholesterol esterase                                                         |
| 2592      | GALT         | galactose-1-phosphate uridylyltransferase                                                              |
| 56884     | FSTL5        | follistatin-like 5                                                                                     |
| 100128310 | LOC100128310 | hypothetical LOC100128310                                                                              |
| 391205    | [No Symbol]  | [No Name]                                                                                              |
| 55998     | NXF5         | nuclear RNA export factor 5                                                                            |
| 5834      | PYGB         | phosphorylase, glycogen; brain                                                                         |
| 4352      | MPL          | myeloproliferative leukemia virus oncogene                                                             |
| 654480    | LOC654480    | ATP synthase, H <sup>+</sup> transporting, mitochondrial F0 complex, subunit C2 (subunit 9) pseudogene |
| 27314     | RAB30        | RAB30, member RAS oncogene family                                                                      |
| 100132214 | [No Symbol]  | [No Name]                                                                                              |
| 6018      | RLF          | rearranged L-myc fusion                                                                                |
| 59343     | SEN2         | SUMO1/sentrin/SMT3 specific peptidase 2                                                                |

|           |              |                                                                |
|-----------|--------------|----------------------------------------------------------------|
| 80833     | APOL3        | apolipoprotein L, 3                                            |
| 170514    | FTLP1        | ferritin, light polypeptide pseudogene 1                       |
| 3632      | INPP5A       | inositol polyphosphate-5-phosphatase, 40kDa                    |
| 10227     | MFSD10       | major facilitator superfamily domain containing 10             |
| 440695    | ETV3L        | ets variant 3-like                                             |
| 65944     | OR2B8P       | olfactory receptor, family 2, subfamily B, member 8 pseudogene |
| 359803    | MRPS17P1     | mitochondrial ribosomal protein S17 pseudogene 1               |
| 643353    | LOC643353    | C9orf140 pseudogene                                            |
| 100131213 | NCRNA00245   | non-protein coding RNA 245                                     |
| 441592    | LOC441592    | mas-related G-protein coupled receptor member X1-like          |
| 8490      | RGSS         | regulator of G-protein signaling 5                             |
| 8737      | RIPK1        | receptor (TNFRSF)-interacting serine-threonine kinase 1        |
| 84699     | CREB3L3      | cAMP responsive element binding protein 3-like 3               |
| 222658    | KCTD20       | potassium channel tetramerisation domain containing 20         |
| 123862    | LOC123862    | interferon induced transmembrane protein pseudogene            |
| 23177     | CEP68        | centrosomal protein 68kDa                                      |
| 407044    | MIR7-2       | microRNA 7-2                                                   |
| 100129476 | LOC100129476 | hypothetical protein LOC100129476                              |
| 400223    | [No Symbol]  | [No Name]                                                      |
| 148709    | LOC148709    | actin pseudogene                                               |
| 10085     | EDIL3        | EGF-like repeats and discoidin I-like domains 3                |
| 347404    | LANCL3       | LanC lantibiotic synthetase component C-like 3 (bacterial)     |
| 648927    | LOC648927    | histone acetyltransferase MYST2-like                           |
| 254268    | AKNAD1       | AKNA domain containing 1                                       |
| 10347     | ABCA7        | ATP-binding cassette, sub-family A (ABC1), member 7            |
| 60558     | GUF1         | GUF1 GTPase homolog ( <i>S. cerevisiae</i> )                   |
| 11149     | BVES         | blood vessel epicardial substance                              |
| 845       | CASQ2        | calsequestrin 2 (cardiac muscle)                               |
| 92797     | HELB         | helicase (DNA) B                                               |
| 116534    | MARGPRE      | MAS-related GPR, member E                                      |
| 347734    | SLC35B2      | solute carrier family 35, member B2                            |
| 717       | C2           | complement component 2                                         |
| 122942    | FRDAP        | Friedreich ataxia pseudogene                                   |
| 56911     | C21orf7      | chromosome 21 open reading frame 7                             |
| 7581      | ZNF33A       | zinc finger protein 33A                                        |

|           |              |                                                                                  |
|-----------|--------------|----------------------------------------------------------------------------------|
| 672       | BRCA1        | breast cancer 1, early onset                                                     |
| 5166      | PDK4         | pyruvate dehydrogenase kinase, isozyme 4                                         |
| 54981     | C9orf95      | chromosome 9 open reading frame 95                                               |
| 100131853 | [No Symbol]  | [No Name]                                                                        |
| 1838      | DTNB         | dystrobrevin, beta                                                               |
| 727999    | [No Symbol]  | [No Name]                                                                        |
| 4694      | NDUFA1       | NADH dehydrogenase (ubiquinone) 1 alpha subcomplex, 1, 7.5kDa                    |
| 359821    | MRPL42P5     | mitochondrial ribosomal protein L42 pseudogene 5                                 |
| 65117     | RSRC2        | arginine/serine-rich coiled-coil 2                                               |
| 100129588 | [No Symbol]  | [No Name]                                                                        |
| 55846     | ITFG2        | integrin alpha FG-GAP repeat containing 2                                        |
| 54921     | CTF8         | CTF8, chromosome transmission fidelity factor 8 homolog ( <i>S. cerevisiae</i> ) |
| 1606      | DGKA         | diacylglycerol kinase, alpha 80kDa                                               |
| 57062     | DDX24        | DEAD (Asp-Glu-Ala-Asp) box polypeptide 24                                        |
| 27086     | FOXP1        | forkhead box P1                                                                  |
| 25909     | AHCTF1       | AT hook containing transcription factor 1                                        |
| 100130298 | LOC100130298 | hCG1816373-like                                                                  |
| 9924      | PAN2         | PAN2 poly(A) specific ribonuclease subunit homolog ( <i>S. cerevisiae</i> )      |
| 4296      | MAP3K11      | mitogen-activated protein kinase kinase kinase 11                                |
| 944       | TNFSF8       | tumor necrosis factor (ligand) superfamily, member 8                             |
| 257103    | NCRNA00205   | non-protein coding RNA 205                                                       |
| 114793    | FMNL2        | formin-like 2                                                                    |
| 166379    | BBS12        | Bardet-Biedl syndrome 12                                                         |
| 285154    | CYP1B1-AS1   | CYP1B1 antisense RNA 1 (non-protein coding)                                      |
| 7326      | UBE2G1       | ubiquitin-conjugating enzyme E2G 1                                               |
| 81930     | KIF18A       | kinesin family member 18A                                                        |
| 79970     | ZNF767       | zinc finger family member 767                                                    |
| 8411      | EEA1         | early endosome antigen 1                                                         |
| 201232    | SLC16A13     | solute carrier family 16, member 13 (monocarboxylic acid transporter 13)         |
| 100126518 | TRNAE-CUC    | transfer RNA glutamic acid (anticodon CUC)                                       |
| 114899    | C1QTNF3      | C1q and tumor necrosis factor related protein 3                                  |
| 92285     | ZNF585B      | zinc finger protein 585B                                                         |
| 337882    | KRTAP19-1    | keratin associated protein 19-1                                                  |
| 55603     | FAM46A       | family with sequence similarity 46, member A                                     |
| 100129572 | LOC100129572 | hypothetical protein LOC100129572                                                |



|           |              |                                                                                  |
|-----------|--------------|----------------------------------------------------------------------------------|
| 441862    | LOC441862    | DUT pseudogene                                                                   |
| 100131484 | [No Symbol]  | [No Name]                                                                        |
| 644517    | LOC644517    | family with sequence similarity 86, member A pseudogene                          |
| 29766     | TMOD3        | tropomodulin 3 (ubiquitous)                                                      |
| 79741     | C10orf68     | chromosome 10 open reading frame 68                                              |
| 64225     | ATL2         | atlastin GTPase 2                                                                |
| 7920      | ABHD16A      | abhydrolase domain containing 16A                                                |
| 402135    | OR5K2        | olfactory receptor, family 5, subfamily K, member 2                              |
| 83896     | KRTAP3-1     | keratin associated protein 3-1                                                   |
| 84660     | CCDC62       | coiled-coil domain containing 62                                                 |
| 79810     | PTCD2        | pentatricopeptide repeat domain 2                                                |
| 63027     | SLC22A23     | solute carrier family 22, member 23                                              |
| 83895     | KRTAP1-5     | keratin associated protein 1-5                                                   |
| 84752     | B3GNT9       | UDP-GlcNAc:betaGal beta-1,3-N-acetylglucosaminyltransferase 9                    |
| 100132735 | LOC100132735 | hypothetical protein LOC100132735                                                |
| 56547     | MMP26        | matrix metalloproteinase 26                                                      |
| 6881      | TAF10        | TAF10 RNA polymerase II, TATA box binding protein (TBP)-associated factor, 30kDa |
| 9128      | PRPF4        | PRP4 pre-mRNA processing factor 4 homolog (yeast)                                |
| 7277      | TUBA4A       | tubulin, alpha 4a                                                                |
| 440077    | ZNF705A      | zinc finger protein 705A                                                         |
| 348825    | TPRXL        | tetra-peptide repeat homeobox-like                                               |
| 4193      | MDM2         | Mdm2 p53 binding protein homolog (mouse)                                         |
| 54815     | GATAD2A      | GATA zinc finger domain containing 2A                                            |
| 27430     | MAT2B        | methionine adenosyltransferase II, beta                                          |
| 400836    | LOC400836    | SDA1 domain containing 1 pseudogene                                              |
| 6474      | SHOX2        | short stature homeobox 2                                                         |
| 353274    | ZNF445       | zinc finger protein 445                                                          |
| 128710    | C20orf94     | chromosome 20 open reading frame 94                                              |
| 6653      | SORL1        | sortilin-related receptor, L(DLR class) A repeats containing                     |
| 5283      | PIGH         | phosphatidylinositol glycan anchor biosynthesis, class H                         |
| 390054    | OR52A5       | olfactory receptor, family 52, subfamily A, member 5                             |
| 9890      | LPPR4        | lipid phosphate phosphatase-related protein type 4                               |
| 100128587 | [No Symbol]  | [No Name]                                                                        |
| 123688    | AGPHD1       | aminoglycoside phosphotransferase domain containing 1                            |
| 374618    | TEX9         | testis expressed 9                                                               |

|           |              |                                                                                   |
|-----------|--------------|-----------------------------------------------------------------------------------|
| 124801    | LSM12        | LSM12 homolog ( <i>S. cerevisiae</i> )                                            |
| 400798    | C1orf220     | chromosome 1 open reading frame 220                                               |
| 7454      | WAS          | Wiskott-Aldrich syndrome (eczema-thrombocytopenia)                                |
| 342776    | MRPS17P7     | mitochondrial ribosomal protein S17 pseudogene 7                                  |
| 120775    | OR2D3        | olfactory receptor, family 2, subfamily D, member 3                               |
| 8848      | TSC22D1      | TSC22 domain family, member 1                                                     |
| 11026     | LILRA3       | leukocyte immunoglobulin-like receptor, subfamily A (without TM domain), member 3 |
| 64840     | PORCN        | porcupine homolog ( <i>Drosophila</i> )                                           |
| 5046      | PCSK6        | proprotein convertase subtilisin/kexin type 6                                     |
| 51316     | PLAC8        | placenta-specific 8                                                               |
| 11197     | WIF1         | WNT inhibitory factor 1                                                           |
| 100131641 | LOC100131641 | RNA binding motif protein 22 pseudogene                                           |
| 55821     | ALLC         | allantoicase                                                                      |
| 81470     | OR2G2        | olfactory receptor, family 2, subfamily G, member 2                               |
| 730105    | [No Symbol]  | [No Name]                                                                         |
| 4477      | MSMB         | microseminoprotein, beta-                                                         |
| 648822    | HMG2P18      | high mobility group nucleosomal binding domain 2 pseudogene 18                    |
| 55013     | CCDC109B     | coiled-coil domain containing 109B                                                |
| 79145     | CHCHD7       | coiled-coil-helix-coiled-coil-helix domain containing 7                           |
| 79862     | ZNF669       | zinc finger protein 669                                                           |
| 170691    | ADAMTS17     | ADAM metalloproteinase with thrombospondin type 1 motif, 17                       |
| 55911     | APOBR        | apolipoprotein B receptor                                                         |
| 100130535 | LOC100130535 | vimentin pseudogene                                                               |
| 151888    | BTLA         | B and T lymphocyte associated                                                     |
| 11135     | CDC42EP1     | CDC42 effector protein (Rho GTPase binding) 1                                     |
| 83416     | FCRL5        | Fc receptor-like 5                                                                |
| 148213    | ZNF681       | zinc finger protein 681                                                           |
| 6869      | TACR1        | tachykinin receptor 1                                                             |
| 100130158 | LOC100130158 | chromosome 16 open reading frame 88 pseudogene                                    |
| 23536     | ADAT1        | adenosine deaminase, tRNA-specific 1                                              |
| 22938     | SNW1         | SNW domain containing 1                                                           |
| 100132636 | [No Symbol]  | [No Name]                                                                         |
| 56970     | ATXN7L3      | ataxin 7-like 3                                                                   |
| 6671      | SP4          | Sp4 transcription factor                                                          |
| 285116    | AHCTF1P1     | AT hook containing transcription factor 1 pseudogene 1                            |

|           |              |                                                             |
|-----------|--------------|-------------------------------------------------------------|
| 4161      | MC5R         | melanocortin 5 receptor                                     |
| 729291    | LOC729291    | hypothetical protein LOC729291                              |
| 283416    | C12orf61     | chromosome 12 open reading frame 61                         |
| 23518     | R3HDM1       | R3H domain containing 1                                     |
| 7473      | WNT3         | wingless-type MMTV integration site family, member 3        |
| 91151     | TIGD7        | tigger transposable element derived 7                       |
| 114195    | SIGLEC22P    | sialic acid binding Ig-like lectin 22, pseudogene           |
| 84858     | ZNF503       | zinc finger protein 503                                     |
| 142680    | SLC34A3      | solute carrier family 34 (sodium phosphate), member 3       |
| 119391    | GSTO2        | glutathione S-transferase omega 2                           |
| 100131796 | LOC100131796 | LP2570                                                      |
| 51631     | LUC7L2       | LUC7-like 2 ( <i>S. cerevisiae</i> )                        |
| 84926     | SPRYD3       | SPRY domain containing 3                                    |
| 178       | AGL          | amylase, alpha-1, 6-glucosidase, 4-alpha-glucanotransferase |
| 100129202 | LOC100129202 | arginine/serine-rich coiled-coil 1 pseudogene               |
| 100129119 | LOC100129119 | hypothetical LOC100129119                                   |
| 100130798 | LOC100130798 | hypothetical LOC100130798                                   |
| 401074    | LOC401074    | hypothetical LOC401074                                      |
| 23233     | EXOC6B       | exocyst complex component 6B                                |
| 255919    | TMEM188      | transmembrane protein 188                                   |
| 100129808 | RPL24P6      | ribosomal protein L24 pseudogene 6                          |
| 140597    | TCEAL2       | transcription elongation factor A (SII)-like 2              |
| 114659    | LRRC37B      | leucine rich repeat containing 37B                          |
| 29887     | SNX10        | sorting nexin 10                                            |
| 7580      | ZNF32        | zinc finger protein 32                                      |
| 441878    | RPS4XP4      | ribosomal protein S4X pseudogene 4                          |
| 4223      | MEOX2        | mesenchyme homeobox 2                                       |
| 11138     | TBC1D8       | TBC1 domain family, member 8 (with GRAM domain)             |
| 285386    | TPRG1        | tumor protein p63 regulated 1                               |
| 4715      | NDUFB9       | NADH dehydrogenase (ubiquinone) 1 beta subcomplex, 9, 22kDa |
| 283683    | LOC283683    | hypothetical LOC283683                                      |
| 5544      | PRB3         | proline-rich protein BstNI subfamily 3                      |
| 100130049 | LOC100130049 | ribosomal L1 domain-containing protein 1-like               |
| 10438     | C1D          | C1D nuclear receptor corepressor                            |
| 116832    | RPL39L       | ribosomal protein L39-like                                  |

|           |             |                                                                                   |
|-----------|-------------|-----------------------------------------------------------------------------------|
| 10242     | KCNMB2      | potassium large conductance calcium-activated channel, subfamily M, beta member 2 |
| 6188      | RPS3        | ribosomal protein S3                                                              |
| 391739    | CCT6P2      | chaperonin containing TCP1, subunit 6 (zeta) pseudogene 2                         |
| 81343     | OR10V2P     | olfactory receptor, family 10, subfamily V, member 2 pseudogene                   |
| 100126476 | TRNAL-CAA   | transfer RNA leucine (anticodon CAA)                                              |
| 6389      | SDHA        | succinate dehydrogenase complex, subunit A, flavoprotein (Fp)                     |
| 117247    | SLC16A10    | solute carrier family 16, member 10 (aromatic amino acid transporter)             |
| 2444      | FRK         | fyn-related kinase                                                                |
| 8314      | BAP1        | BRCA1 associated protein-1 (ubiquitin carboxy-terminal hydrolase)                 |
| 26524     | LATS2       | LATS, large tumor suppressor, homolog 2 (Drosophila)                              |
| 152789    | JAKMIP1     | janus kinase and microtubule interacting protein 1                                |
| 19        | ABCA1       | ATP-binding cassette, sub-family A (ABC1), member 1                               |
| 1050      | CEBPA       | CCAAT/enhancer binding protein (C/EBP), alpha                                     |
| 441548    | LOC441548   | BTB (POZ) domain containing 7 pseudogene                                          |
| 650560    | DDX3YP3     | DEAD (Asp-Glu-Ala-Asp) box polypeptide 3, Y-linked pseudogene 3                   |
| 8061      | FOSL1       | FOS-like antigen 1                                                                |
| 391       | RHOG        | ras homolog gene family, member G (rho G)                                         |
| 134957    | STXBP5      | syntaxin binding protein 5 (tomosyn)                                              |
| 55234     | SMU1        | smu-1 suppressor of mec-8 and unc-52 homolog (C. elegans)                         |
| 1043      | CD52        | CD52 molecule                                                                     |
| 100129750 | [No Symbol] | [No Name]                                                                         |
| 729633    | MRS2P2      | MRS2 magnesium homeostasis factor homolog (S. cerevisiae) pseudogene 2            |
| 7056      | THBD        | thrombomodulin                                                                    |
| 91754     | NEK9        | NIMA (never in mitosis gene a)- related kinase 9                                  |
| 55196     | C12orf35    | chromosome 12 open reading frame 35                                               |
| 3397      | ID1         | inhibitor of DNA binding 1, dominant negative helix-loop-helix protein            |
| 401675    | OR56B3P     | olfactory receptor, family 56, subfamily B, member 3 pseudogene                   |
| 84216     | TMEM117     | transmembrane protein 117                                                         |
| 387707    | CC2D2B      | coiled-coil and C2 domain containing 2B                                           |
| 3964      | LGALS8      | lectin, galactoside-binding, soluble, 8                                           |
| 54809     | SAMD9       | sterile alpha motif domain containing 9                                           |
| 9724      | UTP14C      | UTP14, U3 small nucleolar ribonucleoprotein, homolog C (yeast)                    |
| 7014      | TERF2       | telomeric repeat binding factor 2                                                 |
| 57489     | ODF2L       | outer dense fiber of sperm tails 2-like                                           |
| 340286    | FAM183B     | acyloxyacyl hydrolase (neutrophil)                                                |

|           |             |                                                                       |
|-----------|-------------|-----------------------------------------------------------------------|
| 6477      | SIAH1       | seven in absentia homolog 1 (Drosophila)                              |
| 6616      | SNAP25      | synaptosomal-associated protein, 25kDa                                |
| 100129442 | [No Symbol] | [No Name]                                                             |
| 1656      | DDX6        | DEAD (Asp-Glu-Ala-Asp) box polypeptide 6                              |
| 7594      | ZNF43       | zinc finger protein 43                                                |
| 442221    | LOC442221   | regulator of chromosome condensation 2 pseudogene                     |
| 112476    | PRRT2       | proline-rich transmembrane protein 2                                  |
| 327659    | HDHD1P2     | haloacid dehalogenase-like hydrolase domain containing 1 pseudogene 2 |
| 727916    | LOC727916   | hypothetical protein LOC727916                                        |
| 83866     | TTY11       | testis-specific transcript, Y-linked 11 (non-protein coding)          |
| 8208      | CHAF1B      | chromatin assembly factor 1, subunit B (p60)                          |
| 9882      | TBC1D4      | TBC1 domain family, member 4                                          |
| 29063     | ZCCHC4      | zinc finger, CCHC domain containing 4                                 |
| 340665    | CYP26C1     | cytochrome P450, family 26, subfamily C, polypeptide 1                |
| 643596    | RNF224      | ring finger protein 224                                               |
| 100129464 | CXorf28     | chromosome X open reading frame 28                                    |
| 8580      | OR8C1P      | olfactory receptor, family 8, subfamily C, member 1 pseudogene        |
| 50943     | FOXP3       | forkhead box P3                                                       |
| 642590    | LOC642590   | spermine synthase pseudogene                                          |
| 6453      | ITSN1       | intersectin 1 (SH3 domain protein)                                    |
| 594       | BCKDHB      | branched chain keto acid dehydrogenase E1, beta polypeptide           |
| 402214    | RPL13AP13   | ribosomal protein L13a pseudogene 13                                  |
| 7690      | ZNF131      | zinc finger protein 131                                               |
| 729259    | RPL17P43    | ribosomal protein L17 pseudogene 43                                   |
| 54472     | TOLLIP      | toll interacting protein                                              |
| 389768    | LOC389768   | potassium channel tetramerisation domain containing 1 pseudogene      |
| 3012      | HIST1H2AE   | histone cluster 1, H2ae                                               |
| 391189    | OR11L1      | olfactory receptor, family 11, subfamily L, member 1                  |
| 100132835 | [No Symbol] | [No Name]                                                             |
| 9790      | BMS1        | BMS1 homolog, ribosome assembly protein (yeast)                       |
| 928       | CD9         | CD9 molecule                                                          |
| 400165    | C13orf35    | chromosome 13 open reading frame 35                                   |
| 284086    | NEK8        | NIMA (never in mitosis gene a)- related kinase 8                      |
| 6625      | SNRNP70     | small nuclear ribonucleoprotein 70kDa (U1)                            |
| 100131731 | [No Symbol] | [No Name]                                                             |

|           |              |                                                                            |
|-----------|--------------|----------------------------------------------------------------------------|
| 7743      | ZNF189       | zinc finger protein 189                                                    |
| 2560      | GABRB1       | gamma-aminobutyric acid (GABA) A receptor, beta 1                          |
| 339456    | TMEM52       | transmembrane protein 52                                                   |
| 100130921 | LOC100130921 | hypothetical protein LOC100130921                                          |
| 5431      | POLR2B       | polymerase (RNA) II (DNA directed) polypeptide B, 140kDa                   |
| 29930     | PCDHB1       | protocadherin beta 1                                                       |
| 147711    | ZNF285B      | zinc finger protein 285B, pseudogene                                       |
| 386675    | KRTAP10-7    | keratin associated protein 10-7                                            |
| 761       | CA3          | carbonic anhydrase III, muscle specific                                    |
| 3423      | IDS          | iduronate 2-sulfatase                                                      |
| 1054      | CEBPG        | CCAAT/enhancer binding protein (C/EBP), gamma                              |
| 337879    | KRTAP8-1     | keratin associated protein 8-1                                             |
| 3394      | IRF8         | interferon regulatory factor 8                                             |
| 81224     | OR5AN2P      | olfactory receptor, family 5, subfamily AN, member 2 pseudogene            |
| 23558     | WBP2         | WW domain binding protein 2                                                |
| 161394    | SAMD15       | sterile alpha motif domain containing 15                                   |
| 27125     | AFF4         | AF4/FMR2 family, member 4                                                  |
| 9830      | TRIM14       | tripartite motif containing 14                                             |
| 79089     | TMUB2        | transmembrane and ubiquitin-like domain containing 2                       |
| 100132652 | [No Symbol]  | [No Name]                                                                  |
| 644790    | RPS15AP11    | ribosomal protein S15a pseudogene 11                                       |
| 27        | ABL2         | v-abl Abelson murine leukemia viral oncogene homolog 2                     |
| 84913     | ATOH8        | atonal homolog 8 (Drosophila)                                              |
| 5540      | PPYR1        | pancreatic polypeptide receptor 1                                          |
| 54682     | MANSC1       | MANSC domain containing 1                                                  |
| 574447    | MIR146B      | microRNA 146b                                                              |
| 117584    | RFFL         | ring finger and FYVE-like domain containing 1                              |
| 643167    | LOC643167    | RNA binding motif protein 39 pseudogene                                    |
| 400657    | LOC400657    | hypothetical LOC400657                                                     |
| 643866    | CBLN3        | cerebellin 3 precursor                                                     |
| 644335    | LOC644335    | Smg-5 homolog, nonsense mediated mRNA decay factor (C. elegans) pseudogene |
| 92370     | ACPL2        | acid phosphatase-like 2                                                    |
| 245937    | DEFB124      | defensin, beta 124                                                         |
| 80022     | MYO15B       | myosin XVb pseudogene                                                      |
| 646012    | LOC646012    | aurora kinase A interacting protein 1 pseudogene                           |

|           |              |                                                                          |
|-----------|--------------|--------------------------------------------------------------------------|
| 2231      | FDX1P1       | ferredoxin 1 pseudogene 1                                                |
| 23436     | CELA3B       | chymotrypsin-like elastase family, member 3B                             |
| 7976      | FZD3         | frizzled family receptor 3                                               |
| 100132765 | [No Symbol]  | [No Name]                                                                |
| 137       | ADORA2BP1    | adenosine A2b receptor pseudogene 1                                      |
| 594841    | WDR45P       | WDR45 pseudogene                                                         |
| 9704      | DHX34        | DEAH (Asp-Glu-Ala-His) box polypeptide 34                                |
| 441617    | LOC441617    | hypothetical LOC441617                                                   |
| 83932     | C1orf124     | chromosome 1 open reading frame 124                                      |
| 54487     | DGCR8        | DiGeorge syndrome critical region gene 8                                 |
| 55246     | CCDC25       | coiled-coil domain containing 25                                         |
| 64084     | CLSTN2       | calsyntenin 2                                                            |
| 11167     | FSTL1        | follistatin-like 1                                                       |
| 81282     | OR51G2       | olfactory receptor, family 51, subfamily G, member 2                     |
| 554206    | LOC554206    | hypothetical LOC554206                                                   |
| 391359    | LOC391359    | epithelial membrane protein 2 pseudogene                                 |
| 196074    | METTL15      | methyltransferase like 15                                                |
| 387869    | LOC387869    | microtubule-associated proteins 1A/1B light chain 3B-like                |
| 10681     | GNB5         | guanine nucleotide binding protein (G protein), beta 5                   |
| 11009     | IL24         | interleukin 24                                                           |
| 27145     | FILIP1       | filamin A interacting protein 1                                          |
| 51110     | LACTB2       | lactamase, beta 2                                                        |
| 100130729 | [No Symbol]  | [No Name]                                                                |
| 57101     | ANO2         | anoctamin 2                                                              |
| 27107     | ZBTB11       | zinc finger and BTB domain containing 11                                 |
| 81140     | OR9R1P       | olfactory receptor, family 9, subfamily R, member 1 pseudogene           |
| 10314     | LANCL1       | LanC lantibiotic synthetase component C-like 1 (bacterial)               |
| 151903    | CCDC12       | coiled-coil domain containing 12                                         |
| 54098     | C1QBPP       | complement component 1, q subcomponent binding protein, pseudogene       |
| 100127974 | LOC100127974 | hypothetical LOC100127974                                                |
| 24148     | PRPF6        | PRP6 pre-mRNA processing factor 6 homolog ( <i>S. cerevisiae</i> )       |
| 29101     | SSU72        | SSU72 RNA polymerase II CTD phosphatase homolog ( <i>S. cerevisiae</i> ) |
| 2971      | GTF3A        | general transcription factor IIIA                                        |
| 342531    | ALOX15P1     | arachidonate 15-lipoxygenase pseudogene 1                                |
| 9706      | ULK2         | unc-51-like kinase 2 ( <i>C. elegans</i> )                               |

|           |              |                                                                                                           |
|-----------|--------------|-----------------------------------------------------------------------------------------------------------|
| 100132006 | LOC100132006 | hypothetical protein LOC100132006                                                                         |
| 100130763 | [No Symbol]  | [No Name]                                                                                                 |
| 3925      | STMN1        | stathmin 1                                                                                                |
| 84992     | PIGY         | phosphatidylinositol glycan anchor biosynthesis, class Y                                                  |
| 390329    | OR6U2P       | olfactory receptor, family 6, subfamily U, member 2 pseudogene                                            |
| 100131885 | [No Symbol]  | [No Name]                                                                                                 |
| 4018      | LPA          | lipoprotein, Lp(a)                                                                                        |
| 266724    | HSPA9P1      | heat shock 70kDa protein 9 pseudogene 1                                                                   |
| 9388      | LIPG         | lipase, endothelial                                                                                       |
| 7700      | ZNF141       | zinc finger protein 141                                                                                   |
| 22969     | RPL41P3      | ribosomal protein L41 pseudogene 3                                                                        |
| 85451     | UNK          | unkempt homolog (Drosophila)                                                                              |
| 729708    | TPI1P1       | triosephosphate isomerase 1 pseudogene 1                                                                  |
| 9863      | MAGI2        | membrane associated guanylate kinase, WW and PDZ domain containing 2                                      |
| 9180      | OSMR         | oncostatin M receptor                                                                                     |
| 4210      | MEFV         | Mediterranean fever                                                                                       |
| 151477    | C2orf52      | chromosome 2 open reading frame 52                                                                        |
| 1039      | CDR2         | cerebellar degeneration-related protein 2, 62kDa                                                          |
| 26823     | RNU12-2P     | RNA, U12 small nuclear 2, pseudogene                                                                      |
| 401647    | GOLGA7B      | golgin A7 family, member B                                                                                |
| 65981     | CAPRIN2      | caprin family member 2                                                                                    |
| 384       | ARG2         | arginase, type II                                                                                         |
| 84861     | KLHL22       | kelch-like 22 (Drosophila)                                                                                |
| 8512      | MBL1P        | mannose-binding lectin (protein A) 1, pseudogene                                                          |
| 2972      | BRF1         | BRF1 homolog, subunit of RNA polymerase III transcription initiation factor IIIB ( <i>S. cerevisiae</i> ) |
| 129684    | CNTNAP5      | contactin associated protein-like 5                                                                       |
| 256227    | STEAP1B      | STEAP family member 1B                                                                                    |
| 9667      | SAFB2        | scaffold attachment factor B2                                                                             |
| 2196      | FAT2         | FAT tumor suppressor homolog 2 (Drosophila)                                                               |
| 728567    | RPL23AP48    | ribosomal protein L23a pseudogene 48                                                                      |
| 92736     | OTOP2        | otopetrin 2                                                                                               |
| 728097    | FAM8A2P      | family with sequence similarity 8, member A1 pseudogene                                                   |
| 4817      | NIT1         | nitrilase 1                                                                                               |
| 84440     | RAB11FIP4    | RAB11 family interacting protein 4 (class II)                                                             |
| 100129896 | [No Symbol]  | [No Name]                                                                                                 |



|           |              |                                                                                  |
|-----------|--------------|----------------------------------------------------------------------------------|
| 400506    | C16orf88     | chromosome 16 open reading frame 88                                              |
| 5525      | PPP2R5A      | protein phosphatase 2, regulatory subunit B', alpha                              |
| 729926    | [No Symbol]  | [No Name]                                                                        |
| 216       | ALDH1A1      | aldehyde dehydrogenase 1 family, member A1                                       |
| 26002     | MOXD1        | monooxygenase, DBH-like 1                                                        |
| 200504    | GKN2         | gastrokine 2                                                                     |
| 123720    | WHAMM        | WAS protein homolog associated with actin, golgi membranes and microtubules      |
| 66008     | TRAK2        | trafficking protein, kinesin binding 2                                           |
| 219982    | OR5A1        | olfactory receptor, family 5, subfamily A, member 1                              |
| 51703     | ACSL5        | acyl-CoA synthetase long-chain family member 5                                   |
| 166979    | CDC20B       | cell division cycle 20 homolog B ( <i>S. cerevisiae</i> )                        |
| 253152    | EPHX4        | epoxide hydrolase 4                                                              |
| 10285     | SMNDC1       | survival motor neuron domain containing 1                                        |
| 644915    | METTL15P2    | methyltransferase like 15 pseudogene 2                                           |
| 4909      | NTF4         | neurotrophin 4                                                                   |
| 30008     | EFEMP2       | EGF containing fibulin-like extracellular matrix protein 2                       |
| 29940     | DSE          | dermatan sulfate epimerase                                                       |
| 100130602 | LOC100130602 | regulation of nuclear pre-mRNA domain containing 1A pseudogene                   |
| 90352     | MAGOH3P      | mago-nashi homolog 2, proliferation-associated ( <i>Drosophila</i> ), pseudogene |
| 58476     | TP53INP2     | tumor protein p53 inducible nuclear protein 2                                    |
| 54902     | TTC19        | tetratricopeptide repeat domain 19                                               |
| 81532     | MOB2         | Mps one binder kinase activator-like 2                                           |
| 57657     | HCN3         | hyperpolarization activated cyclic nucleotide-gated potassium channel 3          |
| 84464     | SLX4         | SLX4 structure-specific endonuclease subunit homolog ( <i>S. cerevisiae</i> )    |
| 88455     | ANKRD13A     | ankyrin repeat domain 13A                                                        |
| 150946    | FAM59B       | family with sequence similarity 59, member B                                     |
| 100129458 | LOC100129458 | cell division control protein 42 homolog                                         |
| 9923      | ZBTB40       | zinc finger and BTB domain containing 40                                         |
| 9107      | MTMR6        | myotubularin related protein 6                                                   |
| 100133210 | COX6B1P7     | cytochrome c oxidase subunit VIb polypeptide 1 (ubiquitous) pseudogene 7         |
| 27255     | CNTN6        | contactin 6                                                                      |
| 138716    | C9orf23      | chromosome 9 open reading frame 23                                               |
| 284129    | SLC26A11     | solute carrier family 26, member 11                                              |
| 8639      | AOC3         | amine oxidase, copper containing 3 (vascular adhesion protein 1)                 |
| 9583      | ENTPD4       | ectonucleoside triphosphate diphosphohydrolase 4                                 |

|           |              |                                                                    |
|-----------|--------------|--------------------------------------------------------------------|
| 644669    | LOC644669    | ankyrin repeat domain 30B pseudogene                               |
| 360200    | TMPRSS9      | transmembrane protease, serine 9                                   |
| 100131211 | TMEM194B     | transmembrane protein 194B                                         |
| 83893     | SPATA16      | spermatogenesis associated 16                                      |
| 647034    | RPS14P10     | ribosomal protein S14 pseudogene 10                                |
| 23326     | USP22        | ubiquitin specific peptidase 22                                    |
| 5443      | POMC         | proopiomelanocortin                                                |
| 23264     | ZC3H7B       | zinc finger CCCH-type containing 7B                                |
| 10161     | LPAR6        | lysophosphatidic acid receptor 6                                   |
| 11052     | CPSF6        | cleavage and polyadenylation specific factor 6, 68kDa              |
| 163486    | DENND1B      | DENN/MADD domain containing 1B                                     |
| 1859      | DYRK1A       | dual-specificity tyrosine-(Y)-phosphorylation regulated kinase 1A  |
| 644943    | RASSF10      | Ras association (RalGDS/AF-6) domain family (N-terminal) member 10 |
| 7415      | VCP          | valosin containing protein                                         |
| 3178      | HNRNPA1      | heterogeneous nuclear ribonucleoprotein A1                         |
| 81352     | OR7M1P       | olfactory receptor, family 7, subfamily M, member 1 pseudogene     |
| 49861     | CLDN20       | claudin 20                                                         |
| 100128176 | LOC100128176 | hypothetical protein LOC100128176                                  |
| 729307    | LOC729307    | hypothetical protein LOC729307                                     |
| 79830     | ZMYM1        | zinc finger, MYM-type 1                                            |
| 221527    | ZBTB12       | zinc finger and BTB domain containing 12                           |
| 10748     | KLRAP1       | killer cell lectin-like receptor subfamily A pseudogene 1          |
| 344807    | CD200R1L     | CD200 receptor 1-like                                              |
| 79731     | NARS2        | asparaginyl-tRNA synthetase 2, mitochondrial (putative)            |
| 255798    | C3orf43      | chromosome 3 open reading frame 43                                 |
| 81566     | CSRNP2       | cysteine-serine-rich nuclear protein 2                             |
| 57472     | CNOT6        | CCR4-NOT transcription complex, subunit 6                          |
| 282618    | IL29         | interleukin 29 (interferon, lambda 1)                              |
| 28465     | IGHV1-46     | immunoglobulin heavy variable 1-46                                 |
| 965       | CD58         | CD58 molecule                                                      |
| 10904     | BLCAP        | bladder cancer associated protein                                  |
| 8289      | ARID1A       | AT rich interactive domain 1A (SWI-like)                           |
| 5930      | RBBP6        | retinoblastoma binding protein 6                                   |
| 3577      | CXCR1        | chemokine (C-X-C motif) receptor 1                                 |
| 162962    | ZNF836       | zinc finger protein 836                                            |

|           |              |                                                                  |
|-----------|--------------|------------------------------------------------------------------|
| 285706    | LOC285706    | cytokine receptor-like factor 3 pseudogene                       |
| 8841      | HDAC3        | histone deacetylase 3                                            |
| 100129083 | LOC100129083 | similar to hCG2045285                                            |
| 56006     | C19orf61     | chromosome 19 open reading frame 61                              |
| 27156     | RTDR1        | rhabdoid tumor deletion region gene 1                            |
| 84959     | UBASH3B      | ubiquitin associated and SH3 domain containing B                 |
| 51333     | ZNF771       | zinc finger protein 771                                          |
| 391632    | OR7E35P      | olfactory receptor, family 7, subfamily E, member 35 pseudogene  |
| 7879      | RAB7A        | RAB7A, member RAS oncogene family                                |
| 28999     | KLF15        | Kruppel-like factor 15                                           |
| 284697    | BTBD8        | BTB (POZ) domain containing 8                                    |
| 27154     | BRPF3        | bromodomain and PHD finger containing, 3                         |
| 80737     | C6orf27      | chromosome 6 open reading frame 27                               |
| 136541    | PRSS58       | protease, serine, 58                                             |
| 100130292 | [No Symbol]  | [No Name]                                                        |
| 55110     | MAGOHB       | mago-nashi homolog B (Drosophila)                                |
| 260332    | ECEL1P3      | endothelin converting enzyme-like 1, pseudogene 3                |
| 171019    | ADAMTS19     | ADAM metallopeptidase with thrombospondin type 1 motif, 19       |
| 100131717 | [No Symbol]  | [No Name]                                                        |
| 8503      | PIK3R3       | phosphoinositide-3-kinase, regulatory subunit 3 (gamma)          |
| 7762      | ZNF215       | zinc finger protein 215                                          |
| 3067      | HDC          | histidine decarboxylase                                          |
| 645685    | [No Symbol]  | [No Name]                                                        |
| 23550     | PSD4         | pleckstrin and Sec7 domain containing 4                          |
| 10444     | ZER1         | zer-1 homolog (C. elegans)                                       |
| 407033    | MIR30D       | microRNA 30d                                                     |
| 7150      | TOP1         | topoisomerase (DNA) I                                            |
| 3169      | FOXA1        | forkhead box A1                                                  |
| 54842     | MFSD6        | major facilitator superfamily domain containing 6                |
| 85302     | FBF1         | Fas (TNFRSF6) binding factor 1                                   |
| 79075     | DSCC1        | defective in sister chromatid cohesion 1 homolog (S. cerevisiae) |
| 122622    | ADSSL1       | adenylosuccinate synthase like 1                                 |
| 402394    | IMPDH1P2     | IMP (inosine monophosphate) dehydrogenase 1 pseudogene 2         |
| 221491    | C6orf1       | chromosome 6 open reading frame 1                                |
| 153129    | SLC38A9      | solute carrier family 38, member 9                               |

|           |             |                                                         |
|-----------|-------------|---------------------------------------------------------|
| 8812      | CCNK        | cyclin K                                                |
| 55028     | C17orf80    | chromosome 17 open reading frame 80                     |
| 375611    | SLC26A5     | solute carrier family 26, member 5 (prestin)            |
| 79339     | OR51B4      | olfactory receptor, family 51, subfamily B, member 4    |
| 6122      | RPL3        | ribosomal protein L3                                    |
| 23318     | ZCCHC11     | zinc finger, CCHC domain containing 11                  |
| 8908      | GYG2        | glycogenin 2                                            |
| 23112     | TNRC6B      | trinucleotide repeat containing 6B                      |
| 3606      | IL18        | interleukin 18 (interferon-gamma-inducing factor)       |
| 643954    | RPSAP43     | ribosomal protein SA pseudogene 43                      |
| 9654      | TTLL4       | tubulin tyrosine ligase-like family, member 4           |
| 2856      | GPR33       | G protein-coupled receptor 33 (gene/pseudogene)         |
| 64925     | CCDC71      | coiled-coil domain containing 71                        |
| 23269     | MGA         | MAX gene associated                                     |
| 389033    | LOC389033   | placenta-specific 9 pseudogene                          |
| 7428      | VHL         | von Hippel-Lindau tumor suppressor                      |
| 64764     | CREB3L2     | cAMP responsive element binding protein 3-like 2        |
| 219972    | MPEG1       | macrophage expressed 1                                  |
| 396       | ARHGDI1A    | Rho GDP dissociation inhibitor (GDI) alpha              |
| 23334     | KIAA0467    | KIAA0467                                                |
| 100130246 | [No Symbol] | [No Name]                                               |
| 402057    | RPS17P16    | ribosomal protein S17 pseudogene 16                     |
| 151354    | FAM84A      | family with sequence similarity 84, member A            |
| 100131544 | [No Symbol] | [No Name]                                               |
| 64834     | ELOVL1      | ELOVL fatty acid elongase 1                             |
| 57337     | SEN7        | SUMO1/sentrin specific peptidase 7                      |
| 60675     | PROK2       | prokineticin 2                                          |
| 29104     | N6AMT1      | N-6 adenine-specific DNA methyltransferase 1 (putative) |
| 9778      | KIAA0232    | KIAA0232                                                |
| 389207    | GRXCR1      | glutaredoxin, cysteine rich 1                           |
| 100129289 | [No Symbol] | [No Name]                                               |
| 7351      | UCP2        | uncoupling protein 2 (mitochondrial, proton carrier)    |
| 148641    | SLC35F3     | solute carrier family 35, member F3                     |
| 80273     | GRPEL1      | GrpE-like 1, mitochondrial (E. coli)                    |
| 345930    | ECT2L       | epithelial cell transforming sequence 2 oncogene-like   |

|           |              |                                                                                         |
|-----------|--------------|-----------------------------------------------------------------------------------------|
| 6423      | SFRP2        | secreted frizzled-related protein 2                                                     |
| 645317    | CHCHD2P6     | coiled-coil-helix-coiled-coil-helix domain containing 2 pseudogene 6                    |
| 729643    | [No Symbol]  | [No Name]                                                                               |
| 30834     | ZNRD1        | zinc ribbon domain containing 1                                                         |
| 2326      | FMO1         | flavin containing monooxygenase 1                                                       |
| 285349    | ZNF660       | zinc finger protein 660                                                                 |
| 170954    | KIAA1949     | KIAA1949                                                                                |
| 2122      | MECOM        | MDS1 and EVI1 complex locus                                                             |
| 285359    | LOC285359    | phosducin-like 3 pseudogene                                                             |
| 8193      | DPF1         | D4, zinc and double PHD fingers family 1                                                |
| 100130015 | LOC100130015 | 5-hydroxyisourate hydrolase pseudogene                                                  |
| 60468     | BACH2        | BTB and CNC homology 1, basic leucine zipper transcription factor 2                     |
| 6230      | RPS25        | ribosomal protein S25                                                                   |
| 326       | AIRE         | autoimmune regulator                                                                    |
| 80776     | B9D2         | B9 protein domain 2                                                                     |
| 644548    | LOC644548    | exocyst complex component 5 pseudogene                                                  |
| 51192     | CKLF         | chemokine-like factor                                                                   |
| 390472    | KRT8P2       | keratin 8 pseudogene 2                                                                  |
| 54742     | LY6K         | lymphocyte antigen 6 complex, locus K                                                   |
| 55198     | APPL2        | adaptor protein, phosphotyrosine interaction, PH domain and leucine zipper containing 2 |
| 4237      | MFAP2        | microfibrillar-associated protein 2                                                     |
| 646658    | TMEM90A      | transmembrane protein 90A                                                               |
| 10308     | ZNF267       | zinc finger protein 267                                                                 |
| 100130433 | LOC100130433 | hypothetical protein LOC100130433                                                       |
| 728339    | LOC728339    | hypothetical protein LOC728339                                                          |
| 53838     | C11orf24     | chromosome 11 open reading frame 24                                                     |
| 56160     | NDNL2        | necdin-like 2                                                                           |
| 7464      | CORO2A       | coronin, actin binding protein, 2A                                                      |
| 79991     | OBFC1        | oligonucleotide/oligosaccharide-binding fold containing 1                               |
| 339665    | SLC35E4      | solute carrier family 35, member E4                                                     |
| 84258     | SYT3         | synaptotagmin III                                                                       |
| 10893     | MMP24        | matrix metalloproteinase 24 (membrane-inserted)                                         |
| 3814      | KISS1        | KISS-1 metastasis-suppressor                                                            |
| 80781     | COL18A1      | collagen, type XVIII, alpha 1                                                           |
| 149371    | EXOC8        | exocyst complex component 8                                                             |

|           |              |                                                          |
|-----------|--------------|----------------------------------------------------------|
| 400765    | FLJ35409     | FLJ35409 protein                                         |
| 390203    | LOC390203    | probable polyprenol reductase-like                       |
| 114785    | MBD6         | methyl-CpG binding domain protein 6                      |
| 100131268 | TPT1P1       | tumor protein, translationally-controlled 1 pseudogene 1 |
| 3003      | GZMK         | granzyme K (granzyme 3; tryptase II)                     |
| 54554     | WDR5B        | WD repeat domain 5B                                      |
| 91614     | DEPDC7       | DEP domain containing 7                                  |
| 83598     | LUZP3P       | leucine zipper protein 3, pseudogene                     |
| 2132      | EXT2         | exostosin 2                                              |
| 3696      | ITGB8        | integrin, beta 8                                         |
| 26511     | CHIC2        | cysteine-rich hydrophobic domain 2                       |
| 390078    | OR52E6       | olfactory receptor, family 52, subfamily E, member 6     |
| 100131533 | LOC100131533 | dpy-19-like 4 (C. elegans) pseudogene                    |
| 136540    | TRY3         | trypsinogen-like pseudogene                              |
| 343052    | LOC343052    | similar to hCG1996527                                    |
| 4638      | MYLK         | myosin light chain kinase                                |
| 11184     | MAP4K1       | mitogen-activated protein kinase kinase kinase kinase 1  |
| 6155      | RPL27        | ribosomal protein L27                                    |
| 23331     | TTC28        | tetratricopeptide repeat domain 28                       |
| 100128932 | LOC100128932 | hypothetical LOC100128932                                |
| 51439     | FAM8A1       | family with sequence similarity 8, member A1             |
| 5277      | PIGA         | phosphatidylinositol glycan anchor biosynthesis, class A |
| 647163    | LOC647163    | hypothetical protein LOC647163                           |
| 100131604 | LOC100131604 | similar to hCG2045849                                    |
| 22865     | SLITRK3      | SLIT and NTRK-like family, member 3                      |
| 9658      | ZNF516       | zinc finger protein 516                                  |
| 55779     | WDR52        | WD repeat domain 52                                      |
| 51228     | GLTP         | glycolipid transfer protein                              |
| 142827    | C10orf129    | chromosome 10 open reading frame 129                     |
| 5704      | PSMC4        | proteasome (prosome, macropain) 26S subunit, ATPase, 4   |
| 9814      | SFI1         | Sfi1 homolog, spindle assembly associated (yeast)        |
| 57661     | PHRF1        | PHD and ring finger domains 1                            |
| 55841     | WWC3         | WWC family member 3                                      |
| 162466    | PHOSPHO1     | phosphatase, orphan 1                                    |
| 64081     | PBLD         | phenazine biosynthesis-like protein domain containing    |

|           |              |                                                                                         |
|-----------|--------------|-----------------------------------------------------------------------------------------|
| 57535     | KIAA1324     | KIAA1324                                                                                |
| 100130982 | [No Symbol]  | [No Name]                                                                               |
| 9236      | CCPG1        | cell cycle progression 1                                                                |
| 100131807 | [No Symbol]  | [No Name]                                                                               |
| 91252     | SLC39A13     | solute carrier family 39 (zinc transporter), member 13                                  |
| 728217    | [No Symbol]  | [No Name]                                                                               |
| 100131813 | [No Symbol]  | [No Name]                                                                               |
| 8463      | TEAD2        | TEA domain family member 2                                                              |
| 11120     | BTN2A1       | butyrophilin, subfamily 2, member A1                                                    |
| 51315     | KRCC1        | lysine-rich coiled-coil 1                                                               |
| 285175    | UNC80        | unc-80 homolog (C. elegans)                                                             |
| 100132061 | RPL9P14      | ribosomal protein L9 pseudogene 14                                                      |
| 57238     | [No Symbol]  | [No Name]                                                                               |
| 57862     | ZNF410       | zinc finger protein 410                                                                 |
| 5428      | POLG         | polymerase (DNA directed), gamma                                                        |
| 360160    | CYCSP8       | cytochrome c, somatic pseudogene 8                                                      |
| 100128944 | YWHAQP3      | YWHAQ pseudogene 3                                                                      |
| 57560     | IFT80        | intraflagellar transport 80 homolog (Chlamydomonas)                                     |
| 79993     | ELOVL7       | ELOVL fatty acid elongase 7                                                             |
| 442183    | OR2P1P       | olfactory receptor, family 2, subfamily P, member 1 pseudogene                          |
| 100129251 | FTLP4        | ferritin, light polypeptide pseudogene 4                                                |
| 8034      | SLC25A16     | solute carrier family 25 (mitochondrial carrier; Graves disease autoantigen), member 16 |
| 65084     | TMEM135      | transmembrane protein 135                                                               |
| 28907     | IGKV5-2      | immunoglobulin kappa variable 5-2                                                       |
| 128360    | OR10T2       | olfactory receptor, family 10, subfamily T, member 2                                    |
| 100129835 | [No Symbol]  | [No Name]                                                                               |
| 100132940 | LOC100132940 | protein slowmo homolog 2-like                                                           |
| 5360      | PLTP         | phospholipid transfer protein                                                           |
| 57048     | PLSCR3       | phospholipid scramblase 3                                                               |
| 3163      | HMOX2        | heme oxygenase (decycling) 2                                                            |
| 130355    | C2orf76      | chromosome 2 open reading frame 76                                                      |
| 54904     | WHSC1L1      | Wolf-Hirschhorn syndrome candidate 1-like 1                                             |
| 5567      | PRKACB       | protein kinase, cAMP-dependent, catalytic, beta                                         |
| 221294    | NT5DC1       | 5'-nucleotidase domain containing 1                                                     |
| 23197     | FAF2         | Fas associated factor family member 2                                                   |

|           |              |                                                                        |
|-----------|--------------|------------------------------------------------------------------------|
| 100128266 | RANP6        | RAN, member RAS oncogene family pseudogene 6                           |
| 112840    | WDR89        | WD repeat domain 89                                                    |
| 29927     | SEC61A1      | Sec61 alpha 1 subunit ( <i>S. cerevisiae</i> )                         |
| 146862    | UNC45B       | unc-45 homolog B ( <i>C. elegans</i> )                                 |
| 344758    | GPR149       | G protein-coupled receptor 149                                         |
| 79296     | OR52E1       | olfactory receptor, family 52, subfamily E, member 1 (gene/pseudogene) |
| 729138    | RPLP1P2      | ribosomal protein, large, P1 pseudogene 2                              |
| 100132993 | RPS21P3      | ribosomal protein S21 pseudogene 3                                     |
| 57105     | CYSLTR2      | cysteinyl leukotriene receptor 2                                       |
| 55700     | MAP7D1       | MAP7 domain containing 1                                               |
| 245972    | ATP6V0D2     | ATPase, H+ transporting, lysosomal 38kDa, V0 subunit d2                |
| 677824    | SNORA43      | small nucleolar RNA, H/ACA box 43                                      |
| 728655    | HULC         | highly up-regulated in liver cancer (non-protein coding)               |
| 151194    | METTL21A     | methyltransferase like 21A                                             |
| 645367    | GGT8P        | gamma-glutamyltransferase 8 pseudogene                                 |
| 5558      | PRIM2        | primase, DNA, polypeptide 2 (58kDa)                                    |
| 642702    | [No Symbol]  | [No Name]                                                              |
| 54344     | DPM3         | dolichyl-phosphate mannosyltransferase polypeptide 3                   |
| 100129536 | [No Symbol]  | [No Name]                                                              |
| 2308      | FOXO1        | forkhead box O1                                                        |
| 221016    | CCDC7        | coiled-coil domain containing 7                                        |
| 286076    | BREA2        | breast cancer estrogen-induced apoptosis 2                             |
| 8720      | MBTPS1       | membrane-bound transcription factor peptidase, site 1                  |
| 84154     | RPF2         | ribosome production factor 2 homolog ( <i>S. cerevisiae</i> )          |
| 80003     | PCNXL2       | pecanex-like 2 ( <i>Drosophila</i> )                                   |
| 388931    | MFSD2B       | major facilitator superfamily domain containing 2B                     |
| 54205     | CYCS         | cytochrome c, somatic                                                  |
| 114134    | SLC2A13      | solute carrier family 2 (facilitated glucose transporter), member 13   |
| 5931      | RBBP7        | retinoblastoma binding protein 7                                       |
| 9689      | BZW1         | basic leucine zipper and W2 domains 1                                  |
| 7535      | ZAP70        | zeta-chain (TCR) associated protein kinase 70kDa                       |
| 5623      | PSPN         | persephin                                                              |
| 100131890 | LOC100131890 | neugrin, neurite outgrowth associated pseudogene                       |
| 729808    | [No Symbol]  | [No Name]                                                              |
| 64866     | CDCP1        | CUB domain containing protein 1                                        |



|           |              |                                                                          |
|-----------|--------------|--------------------------------------------------------------------------|
| 10473     | HMGN4        | high mobility group nucleosomal binding domain 4                         |
| 128770    | EIF4E2P1     | eukaryotic translation initiation factor 4E family member 2 pseudogene 1 |
| 57205     | ATP10D       | ATPase, class V, type 10D                                                |
| 5306      | PITPNA       | phosphatidylinositol transfer protein, alpha                             |
| 126820    | WDR63        | WD repeat domain 63                                                      |
| 646600    | C3orf65      | chromosome 3 open reading frame 65                                       |
| 26100     | WIPI2        | WD repeat domain, phosphoinositide interacting 2                         |
| 5988      | RFPL1        | ret finger protein-like 1                                                |
| 100128021 | [No Symbol]  | [No Name]                                                                |
| 8871      | SYNJ2        | synaptojanin 2                                                           |
| 92815     | HIST3H2A     | histone cluster 3, H2a                                                   |
| 56521     | DNAJC12      | DnaJ (Hsp40) homolog, subfamily C, member 12                             |
| 80152     | CENPT        | centromere protein T                                                     |
| 26099     | C1orf144     | chromosome 1 open reading frame 144                                      |
| 56252     | YLPM1        | YLP motif containing 1                                                   |
| 23186     | RCOR1        | REST corepressor 1                                                       |
| 100128208 | [No Symbol]  | [No Name]                                                                |
| 114915    | NCRNA00219   | non-protein coding RNA 219                                               |
| 649489    | LOC649489    | protein phosphatase 1, regulatory (inhibitor) subunit 2 pseudogene       |
| 100132812 | LOC100132812 | nascent polypeptide-associated complex alpha subunit pseudogene          |
| 574452    | MIR494       | microRNA 494                                                             |
| 26505     | CNNM3        | cyclin M3                                                                |
| 132243    | H1FOO        | H1 histone family, member O, oocyte-specific                             |
| 9698      | PUM1         | pumilio homolog 1 (Drosophila)                                           |
| 2778      | GNAS         | GNAS complex locus                                                       |
| 6772      | STAT1        | signal transducer and activator of transcription 1, 91kDa                |
| 644638    | [No Symbol]  | [No Name]                                                                |
| 149111    | CNIH3        | cornichon homolog 3 (Drosophila)                                         |
| 2288      | FKBP4        | FK506 binding protein 4, 59kDa                                           |
| 643449    | [No Symbol]  | [No Name]                                                                |
| 100130564 | SEPT7P7      | septin 7 pseudogene 7                                                    |
| 7030      | TFE3         | transcription factor binding to IGHM enhancer 3                          |
| 399665    | FAM102A      | family with sequence similarity 102, member A                            |
| 442429    | EEF1DP2      | eukaryotic translation elongation factor 1 delta pseudogene 2            |
| 6249      | CLIP1        | CAP-GLY domain containing linker protein 1                               |

|           |              |                                                                               |
|-----------|--------------|-------------------------------------------------------------------------------|
| 100128604 | [No Symbol]  | [No Name]                                                                     |
| 342615    | [No Symbol]  | [No Name]                                                                     |
| 63827     | BCAN         | brevican                                                                      |
| 337876    | CHSY3        | chondroitin sulfate synthase 3                                                |
| 968       | CD68         | CD68 molecule                                                                 |
| 162972    | ZNF550       | zinc finger protein 550                                                       |
| 26093     | CCDC9        | coiled-coil domain containing 9                                               |
| 7266      | DNAJC7       | DnaJ (Hsp40) homolog, subfamily C, member 7                                   |
| 100129191 | [No Symbol]  | [No Name]                                                                     |
| 85486     | RPS19P1      | ribosomal protein S19 pseudogene 1                                            |
| 339843    | LOC339843    | WW domain containing E3 ubiquitin protein ligase 1 pseudogene                 |
| 645513    | LOC645513    | hypothetical LOC645513                                                        |
| 9013      | TAF1C        | TATA box binding protein (TBP)-associated factor, RNA polymerase I, C, 110kDa |
| 100130837 | [No Symbol]  | [No Name]                                                                     |
| 153218    | SPINK13      | serine peptidase inhibitor, Kazal type 13 (putative)                          |
| 256085    | LOC256085    | tryptophan rich basic protein pseudogene                                      |
| 6210      | RPS15A       | ribosomal protein S15a                                                        |
| 286472    | RAC1P4       | ras-related C3 botulinum toxin substrate 1 pseudogene 4                       |
| 5273      | SERPINB10    | serpin peptidase inhibitor, clade B (ovalbumin), member 10                    |
| 81194     | OR5F2P       | olfactory receptor, family 5, subfamily F, member 2 pseudogene                |
| 100129367 | LOC100129367 | nucleolar and coiled-body phosphoprotein 1 pseudogene                         |
| 402213    | LOC402213    | peptidyl-prolyl cis-trans isomerase A-like                                    |
| 100129683 | LOC100129683 | WEE1 homolog ( <i>S. pombe</i> ) pseudogene                                   |
| 6788      | STK3         | serine/threonine kinase 3                                                     |
| 149840    | C20orf196    | chromosome 20 open reading frame 196                                          |
| 8295      | TRRAP        | transformation/transcription domain-associated protein                        |
| 79663     | HSPBAP1      | HSPB (heat shock 27kDa) associated protein 1                                  |
| 360166    | CYCSP10      | cytochrome c, somatic pseudogene 10                                           |
| 10668     | CGRRF1       | cell growth regulator with ring finger domain 1                               |
| 115111    | SLC26A7      | solute carrier family 26, member 7                                            |
| 9249      | DHRS3        | dehydrogenase/reductase (SDR family) member 3                                 |
| 199692    | ZNF627       | zinc finger protein 627                                                       |
| 283588    | LOC283588    | hypothetical LOC283588                                                        |
| 6829      | SUPT5H       | suppressor of Ty 5 homolog ( <i>S. cerevisiae</i> )                           |
| 23609     | MKRN2        | makorin ring finger protein 2                                                 |

|           |             |                                                                                                   |
|-----------|-------------|---------------------------------------------------------------------------------------------------|
| 80345     | ZSCAN16     | zinc finger and SCAN domain containing 16                                                         |
| 1813      | DRD2        | dopamine receptor D2                                                                              |
| 100131338 | RPL15P13    | ribosomal protein L15 pseudogene 13                                                               |
| 27177     | IL36B       | interleukin 36, beta                                                                              |
| 3621      | ING1        | inhibitor of growth family, member 1                                                              |
| 80014     | WWC2        | WW and C2 domain containing 2                                                                     |
| 286676    | ILDR1       | immunoglobulin-like domain containing receptor 1                                                  |
| 100130512 | [No Symbol] | [No Name]                                                                                         |
| 81790     | RNF170      | ring finger protein 170                                                                           |
| 57185     | NIPAL3      | NIPA-like domain containing 3                                                                     |
| 100133205 | NCRNA00240  | non-protein coding RNA 240                                                                        |
| 27347     | STK39       | serine threonine kinase 39                                                                        |
| 55735     | DNAJC11     | DnaJ (Hsp40) homolog, subfamily C, member 11                                                      |
| 26039     | SS18L1      | synovial sarcoma translocation gene on chromosome 18-like 1                                       |
| 7781      | SLC30A3     | solute carrier family 30 (zinc transporter), member 3                                             |
| 10471     | PFDN6       | prefoldin subunit 6                                                                               |
| 11025     | LILRB3      | leukocyte immunoglobulin-like receptor, subfamily B (with TM and ITIM domains), member 3          |
| 169355    | IDO2        | indoleamine 2,3-dioxygenase 2                                                                     |
| 84267     | C9orf64     | chromosome 9 open reading frame 64                                                                |
| 494326    | MIR377      | microRNA 377                                                                                      |
| 728869    | [No Symbol] | [No Name]                                                                                         |
| 10651     | MTX2        | metaxin 2                                                                                         |
| 391707    | LOC391707   | chromatin accessibility complex protein 1-like                                                    |
| 7079      | TIMP4       | TIMP metalloproteinase inhibitor 4                                                                |
| 285095    | LOC285095   | hypothetical protein LOC285095                                                                    |
| 317705    | VN1R5       | vomer nasal 1 receptor 5 (gene/pseudogene)                                                        |
| 23619     | ZIM2        | zinc finger, imprinted 2                                                                          |
| 6922      | SKP1P1      | S-phase kinase-associated protein 1 pseudogene 1                                                  |
| 79071     | ELOVL6      | ELOVL fatty acid elongase 6                                                                       |
| 100128013 | [No Symbol] | [No Name]                                                                                         |
| 6605      | SMARCE1     | SWI/SNF related, matrix associated, actin dependent regulator of chromatin, subfamily e, member 1 |
| 11224     | RPL35       | ribosomal protein L35                                                                             |
| 286343    | C9orf150    | chromosome 9 open reading frame 150                                                               |
| 392529    | LOC392529   | cordon-bleu homolog (mouse) pseudogene                                                            |
| 23054     | NCOA6       | nuclear receptor coactivator 6                                                                    |

|           |              |                                                                          |
|-----------|--------------|--------------------------------------------------------------------------|
| 2057      | EPOR         | erythropoietin receptor                                                  |
| 27091     | CACNG5       | calcium channel, voltage-dependent, gamma subunit 5                      |
| 7620      | ZNF69        | zinc finger protein 69                                                   |
| 23208     | SYT11        | synaptotagmin XI                                                         |
| 51166     | AADAT        | aminoadipate aminotransferase                                            |
| 4627      | MYH9         | myosin, heavy chain 9, non-muscle                                        |
| 144811    | C13orf31     | chromosome 13 open reading frame 31                                      |
| 84632     | AFAP1L2      | actin filament associated protein 1-like 2                               |
| 7975      | MAFK         | v-maf musculoaponeurotic fibrosarcoma oncogene homolog K (avian)         |
| 391804    | RBMX2P5      | RNA binding motif protein, X-linked 2 pseudogene 5                       |
| 100131373 | LOC100131373 | hypothetical LOC100131373                                                |
| 10951     | CBX1         | chromobox homolog 1                                                      |
| 148766    | [No Symbol]  | [No Name]                                                                |
| 10388     | SYCP2        | synaptonemal complex protein 2                                           |
| 51278     | IER5         | immediate early response 5                                               |
| 81209     | OR5BB1P      | olfactory receptor, family 5, subfamily BB, member 1 pseudogene          |
| 55370     | PPP4R1L      | protein phosphatase 4, regulatory subunit 1-like                         |
| 902       | CCNH         | cyclin H                                                                 |
| 100131614 | RPS4XP22     | ribosomal protein S4X pseudogene 22                                      |
| 25929     | GEMIN5       | gem (nuclear organelle) associated protein 5                             |
| 55220     | KLHDC8A      | kelch domain containing 8A                                               |
| 340526    | RGAG4        | retrotransposon gag domain containing 4                                  |
| 80778     | ZNF34        | zinc finger protein 34                                                   |
| 51070     | NOSIP        | nitric oxide synthase interacting protein                                |
| 4738      | NEDD8        | neural precursor cell expressed, developmentally down-regulated 8        |
| 9878      | TOX4         | TOX high mobility group box family member 4                              |
| 7341      | SUMO1        | SMT3 suppressor of mif two 3 homolog 1 ( <i>S. cerevisiae</i> )          |
| 26291     | FGF21        | fibroblast growth factor 21                                              |
| 55506     | H2AFY2       | H2A histone family, member Y2                                            |
| 6529      | SLC6A1       | solute carrier family 6 (neurotransmitter transporter, GABA), member 1   |
| 5201      | PFDN1        | prefoldin subunit 1                                                      |
| 80263     | TRIM45       | tripartite motif containing 45                                           |
| 729124    | [No Symbol]  | [No Name]                                                                |
| 10089     | KCNK7        | potassium channel, subfamily K, member 7                                 |
| 482       | ATP1B2       | ATPase, Na <sup>+</sup> /K <sup>+</sup> transporting, beta 2 polypeptide |

|           |              |                                                                              |
|-----------|--------------|------------------------------------------------------------------------------|
| 55026     | FAM70A       | family with sequence similarity 70, member A                                 |
| 100130098 | [No Symbol]  | [No Name]                                                                    |
| 5329      | PLAUR        | plasminogen activator, urokinase receptor                                    |
| 79692     | ZNF322A      | zinc finger protein 322A                                                     |
| 83888     | FGFBP2       | fibroblast growth factor binding protein 2                                   |
| 118426    | LOH12CR1     | loss of heterozygosity, 12, chromosomal region 1                             |
| 151613    | TTC14        | tetratricopeptide repeat domain 14                                           |
| 56946     | C11orf30     | chromosome 11 open reading frame 30                                          |
| 3562      | IL3          | interleukin 3 (colony-stimulating factor, multiple)                          |
| 3690      | ITGB3        | integrin, beta 3 (platelet glycoprotein IIIa, antigen CD61)                  |
| 93517     | SDR42E1      | short chain dehydrogenase/reductase family 42E, member 1                     |
| 727727    | [No Symbol]  | [No Name]                                                                    |
| 63898     | SH2D4A       | SH2 domain containing 4A                                                     |
| 284443    | ZNF493       | zinc finger protein 493                                                      |
| 54106     | TLR9         | toll-like receptor 9                                                         |
| 23710     | GABARAPL1    | GABA(A) receptor-associated protein like 1                                   |
| 79973     | ZNF442       | zinc finger protein 442                                                      |
| 388962    | BOLA3        | bolA homolog 3 (E. coli)                                                     |
| 54807     | ZNF586       | zinc finger protein 586                                                      |
| 57677     | ZFP14        | zinc finger protein 14 homolog (mouse)                                       |
| 79777     | ACBD4        | acyl-CoA binding domain containing 4                                         |
| 63970     | TP53AIP1     | tumor protein p53 regulated apoptosis inducing protein 1                     |
| 6518      | SLC2A5       | solute carrier family 2 (facilitated glucose/fructose transporter), member 5 |
| 339318    | ZNF181       | zinc finger protein 181                                                      |
| 540       | ATP7B        | ATPase, Cu <sup>++</sup> transporting, beta polypeptide                      |
| 100128898 | LOC100128898 | latexin pseudogene                                                           |
| 55671     | SMEK1        | SMEK homolog 1, suppressor of mek1 (Dictyostelium)                           |
| 391257    | SUMO1P1      | SUMO1 pseudogene 1                                                           |
| 220359    | TIGD3        | tigger transposable element derived 3                                        |
| 729738    | [No Symbol]  | [No Name]                                                                    |
| 23401     | FRAT2        | frequently rearranged in advanced T-cell lymphomas 2                         |
| 391077    | GAPDHP58     | glyceraldehyde 3 phosphate dehydrogenase pseudogene 58                       |
| 57057     | TBX20        | T-box 20                                                                     |
| 643949    | RPLP2P3      | ribosomal protein, large, P2 pseudogene 3                                    |
| 100129847 | LOC100129847 | transforming protein RhoA-like                                               |

|           |             |                                                                                                                     |
|-----------|-------------|---------------------------------------------------------------------------------------------------------------------|
| 197322    | ACSF3       | acyl-CoA synthetase family member 3                                                                                 |
| 27136     | MORC1       | MORC family CW-type zinc finger 1                                                                                   |
| 391533    | LOC391533   | fms-related tyrosine kinase 1 (vascular endothelial growth factor/vascular permeability factor receptor) pseudogene |
| 9651      | PLCH2       | phospholipase C, eta 2                                                                                              |
| 5287      | PIK3C2B     | phosphoinositide-3-kinase, class 2, beta polypeptide                                                                |
| 120       | ADD3        | adducin 3 (gamma)                                                                                                   |
| 55270     | NUDT15      | nudix (nucleoside diphosphate linked moiety X)-type motif 15                                                        |
| 28462     | IGHV1-68    | immunoglobulin heavy variable 1-68 (pseudogene)                                                                     |
| 728152    | [No Symbol] | [No Name]                                                                                                           |
| 349136    | WDR86       | WD repeat domain 86                                                                                                 |
| 3320      | HSP90AA1    | heat shock protein 90kDa alpha (cytosolic), class A member 1                                                        |
| 8642      | DCHS1       | dachsous 1 (Drosophila)                                                                                             |
| 89781     | HPS4        | Hermansky-Pudlak syndrome 4                                                                                         |
| 10017     | BCL2L10     | BCL2-like 10 (apoptosis facilitator)                                                                                |
| 100128903 | NPM1P4      | nucleophosmin 1 (nucleolar phosphoprotein B23, numatrin) pseudogene 4                                               |
| 317701    | VN1R2       | vomeronasal 1 receptor 2                                                                                            |
| 100130511 | [No Symbol] | [No Name]                                                                                                           |
| 6406      | SEMG1       | semenogelin I                                                                                                       |
| 8631      | SKAP1       | src kinase associated phosphoprotein 1                                                                              |
| 2205      | FCER1A      | Fc fragment of IgE, high affinity I, receptor for; alpha polypeptide                                                |
| 3142      | HLX         | H2.0-like homeobox                                                                                                  |
| 64788     | LMF1        | lipase maturation factor 1                                                                                          |
| 375449    | MAST4       | microtubule associated serine/threonine kinase family member 4                                                      |
| 9097      | USP14       | ubiquitin specific peptidase 14 (tRNA-guanine transglycosylase)                                                     |
| 644906    | LOC644906   | malate dehydrogenase 1, NAD (soluble) pseudogene                                                                    |
| 83444     | INO80B      | INO80 complex subunit B                                                                                             |
| 51734     | SEPX1       | selenoprotein X, 1                                                                                                  |
| 100129525 | [No Symbol] | [No Name]                                                                                                           |
| 728724    | LOC728724   | hCG1814486                                                                                                          |
| 4725      | NDUFS5      | NADH dehydrogenase (ubiquinone) Fe-S protein 5, 15kDa (NADH-coenzyme Q reductase)                                   |
| 100130192 | RPS12P31    | ribosomal protein S12 pseudogene 31                                                                                 |
| 645120    | LOC645120   | apoptosis-inducing factor, mitochondrion-associated, 1 pseudogene                                                   |
| 85300     | ATCAY       | ataxia, cerebellar, Cayman type                                                                                     |
| 642460    | ANKRD30BP1  | ankyrin repeat domain 30B pseudogene 1                                                                              |
| 100128431 | GEMIN8P1    | gem (nuclear organelle) associated protein 8 pseudogene 1                                                           |

|        |             |                                                                                                |
|--------|-------------|------------------------------------------------------------------------------------------------|
| 7009   | TMBIM6      | transmembrane BAX inhibitor motif containing 6                                                 |
| 26045  | LRRTM2      | leucine rich repeat transmembrane neuronal 2                                                   |
| 81469  | OR2G3       | olfactory receptor, family 2, subfamily G, member 3                                            |
| 492307 | C8orf22     | chromosome 8 open reading frame 22                                                             |
| 29114  | TAGLN3      | transgelin 3                                                                                   |
| 57017  | COQ9        | coenzyme Q9 homolog ( <i>S. cerevisiae</i> )                                                   |
| 4885   | NPTX2       | neuronal pentraxin II                                                                          |
| 1371   | CPOX        | coproporphyrinogen oxidase                                                                     |
| 11227  | GALNT5      | UDP-N-acetyl-alpha-D-galactosamine:polypeptide N-acetylgalactosaminyltransferase 5 (GalNAc-T5) |
| 65005  | MRPL9       | mitochondrial ribosomal protein L9                                                             |
| 644076 | GLYCAM1     | glycosylation dependent cell adhesion molecule 1 (pseudogene)                                  |
| 23498  | HAAO        | 3-hydroxyanthranilate 3,4-dioxygenase                                                          |
| 57189  | KIAA1147    | KIAA1147                                                                                       |
| 642776 | LOC642776   | hypothetical LOC642776                                                                         |
| 221060 | C10orf111   | chromosome 10 open reading frame 111                                                           |
| 2637   | GBX2        | gastrulation brain homeobox 2                                                                  |
| 729740 | [No Symbol] | [No Name]                                                                                      |
| 10820  | OR7E13P     | olfactory receptor, family 7, subfamily E, member 13 pseudogene                                |
| 9717   | SEC14L5     | SEC14-like 5 ( <i>S. cerevisiae</i> )                                                          |
| 5593   | PRKG2       | protein kinase, cGMP-dependent, type II                                                        |
| 22989  | MYH15       | myosin, heavy chain 15                                                                         |
| 129790 | C7orf13     | chromosome 7 open reading frame 13                                                             |
| 6191   | RPS4X       | ribosomal protein S4, X-linked                                                                 |
| 6014   | RIT2        | Ras-like without CAAX 2                                                                        |
| 4166   | CHST6       | carbohydrate (N-acetylglucosamine 6-O) sulfotransferase 6                                      |
| 2497   | FTH1P2      | ferritin, heavy polypeptide 1 pseudogene 2                                                     |
| 2918   | GRM8        | glutamate receptor, metabotropic 8                                                             |
| 51678  | MPP6        | membrane protein, palmitoylated 6 (MAGUK p55 subfamily member 6)                               |
| 123606 | NIPA1       | non imprinted in Prader-Willi/Angelman syndrome 1                                              |
| 5621   | PRNP        | prion protein                                                                                  |
| 116228 | FAM36A      | family with sequence similarity 36, member A                                                   |
| 5020   | OXT         | oxytocin, prepropeptide                                                                        |
| 26065  | LSM14A      | LSM14A, SCD6 homolog A ( <i>S. cerevisiae</i> )                                                |
| 65989  | DLK2        | delta-like 2 homolog ( <i>Drosophila</i> )                                                     |
| 128997 | SLC9A3P2    | solute carrier family 9 (sodium/hydrogen exchanger), member 3 pseudogene 2                     |

|           |              |                                                                                |
|-----------|--------------|--------------------------------------------------------------------------------|
| 205564    | SENP5        | SUMO1/sentrin specific peptidase 5                                             |
| 353144    | LCE3C        | late cornified envelope 3C                                                     |
| 100131423 | [No Symbol]  | [No Name]                                                                      |
| 79140     | CCDC28B      | coiled-coil domain containing 28B                                              |
| 8676      | STX11        | syntaxin 11                                                                    |
| 2203      | FBP1         | fructose-1,6-bisphosphatase 1                                                  |
| 10040     | TOM1L1       | target of myb1 (chicken)-like 1                                                |
| 100129291 | LOC100129291 | uncharacterized protein CXorf49-like                                           |
| 112464    | PRKCDBP      | protein kinase C, delta binding protein                                        |
| 284390    | ZNF763       | zinc finger protein 763                                                        |
| 245806    | VGLL2        | vestigial like 2 (Drosophila)                                                  |
| 9445      | ITM2B        | integral membrane protein 2B                                                   |
| 6767      | ST13         | suppression of tumorigenicity 13 (colon carcinoma) (Hsp70 interacting protein) |
| 728142    | LOC728142    | hypothetical LOC728142                                                         |
| 149844    | LOC149844    | synaptotagmin binding, cytoplasmic RNA interacting protein pseudogene          |
| 649166    | LOC649166    | eukaryotic translation initiation factor 3, subunit J pseudogene               |
| 729257    | RPS24P4      | ribosomal protein S24 pseudogene 4                                             |
| 730021    | LOC730021    | eukaryotic translation initiation factor 3, subunit J pseudogene               |
| 51        | ACOX1        | acyl-CoA oxidase 1, palmitoyl                                                  |
| 554225    | STRCP1       | stereocilin pseudogene 1                                                       |
| 56681     | SAR1A        | SAR1 homolog A (S. cerevisiae)                                                 |
| 1471      | CST3         | cystatin C                                                                     |
| 392516    | KRT18P49     | keratin 18 pseudogene 49                                                       |
| 4683      | NBN          | nibrin                                                                         |
| 200373    | PCDP1        | primary ciliary dyskinesia protein 1                                           |
| 729142    | [No Symbol]  | [No Name]                                                                      |
| 100124402 | LOC100124402 | ubiquitin-fold modifier conjugating enzyme 1 pseudogene                        |
| 100131471 | LOC100131471 | presenilins-associated rhomboid-like protein, mitochondrial-like               |
| 100128826 | [No Symbol]  | [No Name]                                                                      |
| 2475      | MTOR         | mechanistic target of rapamycin (serine/threonine kinase)                      |
| 5467      | PPARD        | peroxisome proliferator-activated receptor delta                               |
| 374403    | TBC1D10C     | TBC1 domain family, member 10C                                                 |
| 54517     | PUS7         | pseudouridylate synthase 7 homolog (S. cerevisiae)                             |
| 25885     | POLR1A       | polymerase (RNA) I polypeptide A, 194kDa                                       |
| 1448      | CSN3         | casein kappa                                                                   |



|           |              |                                                                                  |
|-----------|--------------|----------------------------------------------------------------------------------|
| 11200     | CHEK2        | CHK2 checkpoint homolog ( <i>S. pombe</i> )                                      |
| 4693      | NDP          | Norrie disease (pseudoglioma)                                                    |
| 402374    | OR13D3P      | olfactory receptor, family 13, subfamily D, member 3 pseudogene                  |
| 221756    | MGC39372     | serpin peptidase inhibitor, clade B (ovalbumin), member 9 pseudogene             |
| 5726      | TAS2R38      | taste receptor, type 2, member 38                                                |
| 3305      | HSPA1L       | heat shock 70kDa protein 1-like                                                  |
| 790       | CAD          | carbamoyl-phosphate synthetase 2, aspartate transcarbamylase, and dihydroorotase |
| 100129103 | [No Symbol]  | [No Name]                                                                        |
| 8994      | LIMD1        | LIM domains containing 1                                                         |
| 6940      | ZNF354A      | zinc finger protein 354A                                                         |
| 5859      | QARS         | glutaminyl-tRNA synthetase                                                       |
| 2533      | FYB          | FYN binding protein                                                              |
| 92126     | DSEL         | dermatan sulfate epimerase-like                                                  |
| 644129    | LOC644129    | hypothetical protein LOC644129                                                   |
| 9853      | RUSC2        | RUN and SH3 domain containing 2                                                  |
| 804       | CALM1P2      | calmodulin 1 (phosphorylase kinase, delta) pseudogene 2                          |
| 100129362 | [No Symbol]  | [No Name]                                                                        |
| 56259     | CTNNB1       | catenin, beta like 1                                                             |
| 818       | CAMK2G       | calcium/calmodulin-dependent protein kinase II gamma                             |
| 8534      | CHST1        | carbohydrate (keratan sulfate Gal-6) sulfotransferase 1                          |
| 221504    | ZBTB9        | zinc finger and BTB domain containing 9                                          |
| 8618      | CADPS        | Ca <sup>++</sup> -dependent secretion activator                                  |
| 340602    | CXorf67      | chromosome X open reading frame 67                                               |
| 157956    | CDC20P1      | cell division cycle 20 homolog ( <i>S. cerevisiae</i> ) pseudogene 1             |
| 252839    | TMEM9        | transmembrane protein 9                                                          |
| 11098     | PRSS23       | protease, serine, 23                                                             |
| 100130147 | [No Symbol]  | [No Name]                                                                        |
| 58158     | NEUROD4      | neurogenic differentiation 4                                                     |
| 100128422 | [No Symbol]  | [No Name]                                                                        |
| 167359    | NIM1         | serine/threonine-protein kinase NIM1                                             |
| 3061      | HCRTR1       | hypocretin (orexin) receptor 1                                                   |
| 100130331 | LOC100130331 | actin, gamma-like                                                                |
| 6697      | SPR          | sepiapterin reductase (7,8-dihydrobiopterin:NADP <sup>+</sup> oxidoreductase)    |
| 3720      | JARID2       | jumonji, AT rich interactive domain 2                                            |
| 140469    | MYO3B        | myosin IIIB                                                                      |

|           |              |                                                                            |
|-----------|--------------|----------------------------------------------------------------------------|
| 7204      | TRIO         | triple functional domain (PTPRF interacting)                               |
| 57505     | AARS2        | alanyl-tRNA synthetase 2, mitochondrial (putative)                         |
| 100129427 | LOC100129427 | hypothetical LOC100129427                                                  |
| 5495      | PPM1B        | protein phosphatase, Mg <sup>2+</sup> /Mn <sup>2+</sup> dependent, 1B      |
| 994       | CDC25B       | cell division cycle 25 homolog B ( <i>S. pombe</i> )                       |
| 735301    | SNHG9        | small nucleolar RNA host gene 9 (non-protein coding)                       |
| 55280     | CWF19L1      | CWF19-like 1, cell cycle control ( <i>S. pombe</i> )                       |
| 1647      | GADD45A      | growth arrest and DNA-damage-inducible, alpha                              |
| 26225     | ARL5A        | ADP-ribosylation factor-like 5A                                            |
| 100129523 | [No Symbol]  | [No Name]                                                                  |
| 10772     | SRSF10       | serine/arginine-rich splicing factor 10                                    |
| 5256      | PHKA2        | phosphorylase kinase, alpha 2 (liver)                                      |
| 100130302 | FAM48B1      | family with sequence similarity 48, member B1                              |
| 26164     | GTPBP5       | GTP binding protein 5 (putative)                                           |
| 7165      | TPD52L2      | tumor protein D52-like 2                                                   |
| 390436    | OR4K17       | olfactory receptor, family 4, subfamily K, member 17                       |
| 100129960 | LOC100129960 | syntenin-1-like                                                            |
| 130540    | ALS2CR12     | amyotrophic lateral sclerosis 2 (juvenile) chromosome region, candidate 12 |
| 166929    | SGMS2        | sphingomyelin synthase 2                                                   |
| 2020      | EN2          | engrailed homeobox 2                                                       |
| 81407     | OR2W4P       | olfactory receptor, family 2, subfamily W, member 4 pseudogene             |
| 23603     | CORO1C       | coronin, actin binding protein, 1C                                         |
| 646255    | RPL19P16     | ribosomal protein L19 pseudogene 16                                        |
| 353174    | ZACN         | zinc activated ligand-gated ion channel                                    |
| 150       | ADRA2A       | adrenergic, alpha-2A-, receptor                                            |
| 5195      | PEX14        | peroxisomal biogenesis factor 14                                           |
| 215       | ABCD1        | ATP-binding cassette, sub-family D (ALD), member 1                         |
| 54530     | [No Symbol]  | [No Name]                                                                  |
| 90637     | ZFAND2A      | zinc finger, AN1-type domain 2A                                            |
| 100131726 | LOC100131726 | HCC-related HCC-C11_v3                                                     |
| 348980    | HCN1         | hyperpolarization activated cyclic nucleotide-gated potassium channel 1    |
| 4439      | MSH5         | mutS homolog 5 ( <i>E. coli</i> )                                          |
| 1007      | CDH9         | cadherin 9, type 2 (T1-cadherin)                                           |
| 100129061 | RPL7P25      | ribosomal protein L7 pseudogene 25                                         |
| 139163    | SALL1P1      | sal-like 1 ( <i>Drosophila</i> ) pseudogene 1                              |

|           |              |                                                                                                                |
|-----------|--------------|----------------------------------------------------------------------------------------------------------------|
| 2058      | EPRS         | glutamyl-prolyl-tRNA synthetase                                                                                |
| 645360    | HMGB3P5      | high mobility group box 3 pseudogene 5                                                                         |
| 100129658 | LOC100129658 | ubiquitin-conjugating enzyme E2 variant 1-like                                                                 |
| 9788      | MTSS1        | metastasis suppressor 1                                                                                        |
| 80318     | GKAP1        | G kinase anchoring protein 1                                                                                   |
| 65243     | ZNF643       | zinc finger protein 643                                                                                        |
| 54986     | ULK4         | unc-51-like kinase 4 (C. elegans)                                                                              |
| 54931     | RG9MTD1      | RNA (guanine-9-) methyltransferase domain containing 1                                                         |
| 344760    | VN2R1P       | vomeronasal 2 receptor 1 pseudogene                                                                            |
| 1522      | CTSZ         | cathepsin Z                                                                                                    |
| 5434      | POLR2E       | polymerase (RNA) II (DNA directed) polypeptide E, 25kDa                                                        |
| 400129    | SMARCE1P5    | SWI/SNF related, matrix associated, actin dependent regulator of chromatin, subfamily e, member 1 pseudogene 5 |
| 1690      | COCH         | coagulation factor C homolog, cochlin (Limulus polyphemus)                                                     |
| 6259      | RYK          | RYK receptor-like tyrosine kinase                                                                              |
| 54019     | SLC6A6P1     | solute carrier family 6, member 6 pseudogene 1                                                                 |
| 7918      | GPANK1       | G patch domain and ankyrin repeats 1                                                                           |
| 6854      | SYN2         | synapsin II                                                                                                    |
| 643875    | CNN3P1       | calponin 3, acidic pseudogene 1                                                                                |
| 442338    | IRS3P        | insulin receptor substrate 3, pseudogene                                                                       |
| 81619     | TSPAN14      | tetraspanin 14                                                                                                 |
| 286183    | NKAIN3       | Na <sup>+</sup> /K <sup>+</sup> transporting ATPase interacting 3                                              |
| 81856     | ZNF611       | zinc finger protein 611                                                                                        |
| 100132529 | LOC100132529 | hypothetical LOC100132529                                                                                      |
| 10560     | SLC19A2      | solute carrier family 19 (thiamine transporter), member 2                                                      |
| 3608      | ILF2         | interleukin enhancer binding factor 2, 45kDa                                                                   |
| 4045      | LSAMP        | limbic system-associated membrane protein                                                                      |
| 64403     | CDH24        | cadherin 24, type 2                                                                                            |
| 643582    | LOC643582    | aldo-keto reductase family 1, member B10 (aldose reductase) pseudogene                                         |
| 791120    | [No Symbol]  | [No Name]                                                                                                      |
| 574080    | LOC574080    | uncharacterized hematopoietic stem/progenitor cells protein MDS029 pseudogene 3                                |
| 23266     | LPHN2        | latrophilin 2                                                                                                  |
| 389203    | C4orf52      | chromosome 4 open reading frame 52                                                                             |
| 2145      | EZH1         | enhancer of zeste homolog 1 (Drosophila)                                                                       |
| 2590      | GALNT2       | UDP-N-acetyl-alpha-D-galactosamine:polypeptide N-acetylgalactosaminyltransferase 2 (GalNAc-T2)                 |
| 7318      | UBA7         | ubiquitin-like modifier activating enzyme 7                                                                    |

|           |             |                                                                                              |
|-----------|-------------|----------------------------------------------------------------------------------------------|
| 127428    | TCEANC2     | transcription elongation factor A (SII) N-terminal and central domain containing 2           |
| 23766     | GABARAPL3   | GABA(A) receptors associated protein like 3, pseudogene                                      |
| 392454    | LOC392454   | proliferating cell nuclear antigen pseudogene                                                |
| 643684    | [No Symbol] | [No Name]                                                                                    |
| 55410     | NCRNA00185  | non-protein coding RNA 185                                                                   |
| 643264    | RPL21P106   | ribosomal protein L21 pseudogene 106                                                         |
| 440031    | LOC440031   | hypothetical LOC440031                                                                       |
| 125875    | CLDND2      | claudin domain containing 2                                                                  |
| 58490     | RPRD1B      | regulation of nuclear pre-mRNA domain containing 1B                                          |
| 23248     | RPRD2       | regulation of nuclear pre-mRNA domain containing 2                                           |
| 51564     | HDAC7       | histone deacetylase 7                                                                        |
| 9994      | CASP8AP2    | caspase 8 associated protein 2                                                               |
| 100127206 | KIAA1024L   | KIAA1024-like                                                                                |
| 8857      | FCGBP       | Fc fragment of IgG binding protein                                                           |
| 10214     | SSX3        | synovial sarcoma, X breakpoint 3                                                             |
| 399979    | SNX19       | sorting nexin 19                                                                             |
| 22987     | SV2C        | synaptic vesicle glycoprotein 2C                                                             |
| 644780    | [No Symbol] | [No Name]                                                                                    |
| 55773     | TBC1D23     | TBC1 domain family, member 23                                                                |
| 729717    | [No Symbol] | [No Name]                                                                                    |
| 389458    | LOC389458   | hypothetical LOC389458                                                                       |
| 100133235 | RPL26P14    | ribosomal protein L26 pseudogene 14                                                          |
| 130813    | C2orf50     | chromosome 2 open reading frame 50                                                           |
| 399687    | MYO18A      | myosin XVIII A                                                                               |
| 79161     | C7orf23     | chromosome 7 open reading frame 23                                                           |
| 83551     | TAAR8       | trace amine associated receptor 8                                                            |
| 100132755 | [No Symbol] | [No Name]                                                                                    |
| 8578      | SCARF1      | scavenger receptor class F, member 1                                                         |
| 399950    | ST13P10     | suppression of tumorigenicity 13 (colon carcinoma) (Hsp70 interacting protein) pseudogene 10 |
| 91937     | TIMD4       | T-cell immunoglobulin and mucin domain containing 4                                          |
| 126626    | GABPB2      | GA binding protein transcription factor, beta subunit 2                                      |
| 2395      | FXN         | frataxin                                                                                     |
| 728665    | [No Symbol] | [No Name]                                                                                    |
| 728342    | LOC728342   | hypothetical protein LOC728342                                                               |
| 84217     | ZMYND12     | zinc finger, MYND-type containing 12                                                         |

|           |              |                                                                |
|-----------|--------------|----------------------------------------------------------------|
| 128218    | TMEM125      | transmembrane protein 125                                      |
| 100128999 | [No Symbol]  | [No Name]                                                      |
| 100131925 | [No Symbol]  | [No Name]                                                      |
| 374872    | C19orf35     | chromosome 19 open reading frame 35                            |
| 3208      | HPCA         | hippocalcin                                                    |
| 10804     | GJB6         | gap junction protein, beta 6, 30kDa                            |
| 128371    | OR6K6        | olfactory receptor, family 6, subfamily K, member 6            |
| 100128548 | LOC100128548 | 60S ribosomal protein L17-like                                 |
| 100131983 | HNRNPA1P25   | heterogeneous nuclear ribonucleoprotein A1 pseudogene 25       |
| 26872     | STEAP1       | six transmembrane epithelial antigen of the prostate 1         |
| 728777    | [No Symbol]  | [No Name]                                                      |
| 729537    | [No Symbol]  | [No Name]                                                      |
| 80352     | RNF39        | ring finger protein 39                                         |
| 730255    | RPL17P8      | ribosomal protein L17 pseudogene 8                             |
| 5488      | PPIAP16      | peptidylprolyl isomerase A (cyclophilin A) pseudogene 16       |
| 3096      | HIVEP1       | human immunodeficiency virus type I enhancer binding protein 1 |
| 100129388 | LOC100129388 | RWD domain-containing protein 1-like                           |
| 55339     | WDR33        | WD repeat domain 33                                            |
| 27294     | DHDH         | dihydrodiol dehydrogenase (dimeric)                            |
| 645996    | NAP1L6       | nucleosome assembly protein 1-like 6                           |
| 6141      | RPL18        | ribosomal protein L18                                          |
| 1361      | CPB2         | carboxypeptidase B2 (plasma)                                   |
| 2764      | GMFB         | glia maturation factor, beta                                   |
| 6862      | T            | T, brachyury homolog (mouse)                                   |
| 7592      | ZNF41        | zinc finger protein 41                                         |
| 5888      | RAD51        | RAD51 homolog ( <i>S. cerevisiae</i> )                         |
| 801       | CALM1        | calmodulin 1 (phosphorylase kinase, delta)                     |
| 728805    | LOC728805    | hypothetical protein LOC728805                                 |
| 147660    | ZNF578       | zinc finger protein 578                                        |
| 643246    | MAP1LC3B2    | microtubule-associated protein 1 light chain 3 beta 2          |
| 64324     | NSD1         | nuclear receptor binding SET domain protein 1                  |
| 3043      | HBB          | hemoglobin, beta                                               |
| 7504      | XK           | X-linked Kx blood group (McLeod syndrome)                      |
| 23270     | TSPYL4       | TSPY-like 4                                                    |
| 100130251 | LOC100130251 | hypothetical LOC100130251                                      |

|           |              |                                                                                                                |
|-----------|--------------|----------------------------------------------------------------------------------------------------------------|
| 90665     | TBL1Y        | transducin (beta)-like 1, Y-linked                                                                             |
| 23336     | SYNM         | synemin, intermediate filament protein                                                                         |
| 1087      | CEACAM7      | carcinoembryonic antigen-related cell adhesion molecule 7                                                      |
| 158833    | AWAT1        | acyl-CoA wax alcohol acyltransferase 1                                                                         |
| 54477     | PLEKHA5      | pleckstrin homology domain containing, family A member 5                                                       |
| 650172    | CCT4P1       | chaperonin containing TCP1, subunit 4 (delta) pseudogene 1                                                     |
| 3652      | IPP          | intracisternal A particle-promoted polypeptide                                                                 |
| 5007      | OSBP         | oxysterol binding protein                                                                                      |
| 5168      | ENPP2        | ectonucleotide pyrophosphatase/phosphodiesterase 2                                                             |
| 4313      | MMP2         | matrix metalloproteinase 2 (gelatinase A, 72kDa gelatinase, 72kDa type IV collagenase)                         |
| 55644     | OSGEP        | O-sialoglycoprotein endopeptidase                                                                              |
| 100128454 | LOC100128454 | 39S ribosomal protein L32, mitochondrial-like                                                                  |
| 646196    | SMARCE1P6    | SWI/SNF related, matrix associated, actin dependent regulator of chromatin, subfamily e, member 1 pseudogene 6 |
| 642791    | LOC642791    | elongation factor 1-alpha 2-like                                                                               |
| 6631      | SNRPC        | small nuclear ribonucleoprotein polypeptide C                                                                  |
| 6347      | CCL2         | chemokine (C-C motif) ligand 2                                                                                 |
| 442211    | ATP6V0CP3    | ATPase, H+ transporting, lysosomal 16kDa, V0 subunit c pseudogene 3                                            |
| 83714     | NRIP2        | nuclear receptor interacting protein 2                                                                         |
| 51164     | DCTN4        | dynactin 4 (p62)                                                                                               |
| 729009    | FTH1P20      | ferritin, heavy polypeptide 1 pseudogene 20                                                                    |
| 100132973 | LOC100132973 | transcription elongation factor B (SIII), polypeptide 1 (15kDa, elongin C) pseudogene                          |
| 147199    | SCGB1C1      | secretoglobin, family 1C, member 1                                                                             |
| 100129256 | LOC100129256 | nicotinamide nucleotide adenylyltransferase 1 pseudogene                                                       |
| 79869     | CPSF7        | cleavage and polyadenylation specific factor 7, 59kDa                                                          |
| 54885     | TBC1D8B      | TBC1 domain family, member 8B (with GRAM domain)                                                               |
| 22920     | KIFAP3       | kinesin-associated protein 3                                                                                   |
| 131578    | LRRC15       | leucine rich repeat containing 15                                                                              |
| 285908    | NCRNA00174   | non-protein coding RNA 174                                                                                     |
| 441938    | [No Symbol]  | [No Name]                                                                                                      |
| 255725    | OR52B2       | olfactory receptor, family 52, subfamily B, member 2                                                           |
| 100128420 | LOC100128420 | hypothetical protein LOC100128420                                                                              |
| 494197    | SPANX5       | SPANX family, member N5                                                                                        |
| 100129377 | RPL23P9      | ribosomal protein L23 pseudogene 9                                                                             |
| 10572     | SIVA1        | SIVA1, apoptosis-inducing factor                                                                               |
| 2101      | ESRRA        | estrogen-related receptor alpha                                                                                |

|           |              |                                                                    |
|-----------|--------------|--------------------------------------------------------------------|
| 4818      | NKG7         | natural killer cell group 7 sequence                               |
| 1968      | EIF2S3       | eukaryotic translation initiation factor 2, subunit 3 gamma, 52kDa |
| 222698    | NKAPL        | NFKB activating protein-like                                       |
| 27063     | ANKRD1       | ankyrin repeat domain 1 (cardiac muscle)                           |
| 7363      | UGT2B4       | UDP glucuronosyltransferase 2 family, polypeptide B4               |
| 9334      | B4GALT5      | UDP-Gal:betaGlcNAc beta 1,4- galactosyltransferase, polypeptide 5  |
| 732156    | LOC732156    | mucin-3A-like                                                      |
| 1164      | CKS2         | CDC28 protein kinase regulatory subunit 2                          |
| 4802      | NFYC         | nuclear transcription factor Y, gamma                              |
| 442213    | C6orf138     | chromosome 6 open reading frame 138                                |
| 57717     | PCDHB16      | protocadherin beta 16                                              |
| 81487     | OR10AA1P     | olfactory receptor, family 10, subfamily AA, member 1 pseudogene   |
| 100131051 | LOC100131051 | mediator complex subunit 28 pseudogene                             |
| 8567      | MADD         | MAP-kinase activating death domain                                 |
| 56288     | PARD3        | par-3 partitioning defective 3 homolog (C. elegans)                |
| 6898      | TAT          | tyrosine aminotransferase                                          |
| 85027     | C5orf62      | chromosome 5 open reading frame 62                                 |
| 6622      | SNCA         | synuclein, alpha (non A4 component of amyloid precursor)           |
| 100131935 | GAPDHP41     | glyceraldehyde 3 phosphate dehydrogenase pseudogene 41             |
| 27329     | ANGPTL3      | angiopoietin-like 3                                                |
| 25777     | SUN2         | Sad1 and UNC84 domain containing 2                                 |
| 79742     | CXorf36      | chromosome X open reading frame 36                                 |
| 339559    | ZNF642       | zinc finger protein 642                                            |
| 55140     | ELP3         | elongation protein 3 homolog (S. cerevisiae)                       |
| 29950     | SERTAD1      | SERTA domain containing 1                                          |
| 29980     | DONSON       | downstream neighbor of SON                                         |
| 5676      | PSG7         | pregnancy specific beta-1-glycoprotein 7 (gene/pseudogene)         |
| 29925     | GMPPB        | GDP-mannose pyrophosphorylase B                                    |
| 9699      | RIMS2        | regulating synaptic membrane exocytosis 2                          |
| 79613     | TMCO7        | transmembrane and coiled-coil domains 7                            |
| 645053    | [No Symbol]  | [No Name]                                                          |
| 348645    | C22orf34     | chromosome 22 open reading frame 34                                |
| 4584      | MUC3A        | mucin 3A, cell surface associated                                  |
| 8443      | GNPAT        | glyceronephosphate O-acyltransferase                               |
| 93611     | FBXO44       | F-box protein 44                                                   |

|           |              |                                                                                           |
|-----------|--------------|-------------------------------------------------------------------------------------------|
| 407037    | MIR320A      | microRNA 320a                                                                             |
| 646720    | [No Symbol]  | [No Name]                                                                                 |
| 729971    | [No Symbol]  | [No Name]                                                                                 |
| 729082    | LOC729082    | hypothetical LOC729082                                                                    |
| 388942    | LOC388942    | hypothetical LOC388942                                                                    |
| 2741      | GLRA1        | glycine receptor, alpha 1                                                                 |
| 23639     | LRR6         | leucine rich repeat containing 6                                                          |
| 54469     | ZFAND6       | zinc finger, AN1-type domain 6                                                            |
| 64321     | SOX17        | SRY (sex determining region Y)-box 17                                                     |
| 4215      | MAP3K3       | mitogen-activated protein kinase kinase kinase 3                                          |
| 100132310 | LOC100132310 | FCF1 small subunit (SSU) processome component homolog ( <i>S. cerevisiae</i> ) pseudogene |
| 2117      | ETV3         | ets variant 3                                                                             |
| 9674      | KIAA0040     | KIAA0040                                                                                  |
| 2502      | FTH1P10      | ferritin, heavy polypeptide 1 pseudogene 10                                               |
| 100132739 | [No Symbol]  | [No Name]                                                                                 |
| 390107    | RPS24P15     | ribosomal protein S24 pseudogene 15                                                       |
| 51135     | IRAK4        | interleukin-1 receptor-associated kinase 4                                                |
| 80097     | MZT2B        | mitotic spindle organizing protein 2B                                                     |
| 5875      | RABGGTA      | Rab geranylgeranyltransferase, alpha subunit                                              |
| 2059      | EPS8         | epidermal growth factor receptor pathway substrate 8                                      |
| 83696     | TRAPPC9      | trafficking protein particle complex 9                                                    |
| 2070      | EYA4         | eyes absent homolog 4 ( <i>Drosophila</i> )                                               |
| 11086     | ADAM29       | ADAM metallopeptidase domain 29                                                           |
| 403315    | FAM92A3      | family with sequence similarity 92, member A3                                             |
| 651250    | LOC651250    | leucine rich repeat containing 37, member A3 pseudogene                                   |
| 392133    | OR10AC1P     | olfactory receptor, family 10, subfamily AC, member 1 pseudogene                          |
| 57181     | SLC39A10     | solute carrier family 39 (zinc transporter), member 10                                    |
| 50650     | ARHGEF3      | Rho guanine nucleotide exchange factor (GEF) 3                                            |
| 51447     | IP6K2        | inositol hexakisphosphate kinase 2                                                        |
| 81617     | CAB39L       | calcium binding protein 39-like                                                           |
| 100129248 | LOC100129248 | polyprenyl pyrophosphate synthetase pseudogene                                            |
| 152405    | C3orf30      | chromosome 3 open reading frame 30                                                        |
| 100133108 | RPL13P10     | ribosomal protein L13 pseudogene 10                                                       |
| 131965    | METTL6       | methyltransferase like 6                                                                  |
| 56658     | TRIM39       | tripartite motif containing 39                                                            |



|           |              |                                                                                   |
|-----------|--------------|-----------------------------------------------------------------------------------|
| 10678     | B3GNT2       | UDP-GlcNAc:betaGal beta-1,3-N-acetylglucosaminyltransferase 2                     |
| 2246      | FGF1         | fibroblast growth factor 1 (acidic)                                               |
| 8338      | HIST2H2AC    | histone cluster 2, H2ac                                                           |
| 126826    | TGIF2P1      | TGFB-induced factor homeobox 2 pseudogene 1                                       |
| 92259     | MRPS36       | mitochondrial ribosomal protein S36                                               |
| 100101246 | LOC100101246 | interferon induced transmembrane protein pseudogene                               |
| 115653    | KIR3DL3      | killer cell immunoglobulin-like receptor, three domains, long cytoplasmic tail, 3 |
| 1831      | TSC22D3      | TSC22 domain family, member 3                                                     |
| 100129831 | LOC100129831 | EPWW6493                                                                          |
| 1263      | PLK3         | polo-like kinase 3                                                                |
| 10870     | HCST         | hematopoietic cell signal transducer                                              |
| 4200      | ME2          | malic enzyme 2, NAD(+)-dependent, mitochondrial                                   |
| 90634     | N4BP2L1      | NEDD4 binding protein 2-like 1                                                    |
| 646612    | EEF1A1P25    | eukaryotic translation elongation factor 1 alpha 1 pseudogene 25                  |
| 64478     | CSMD1        | CUB and Sushi multiple domains 1                                                  |
| 154860    | LOC154860    | hypothetical LOC154860                                                            |
| 645874    | [No Symbol]  | [No Name]                                                                         |
| 643916    | LOC643916    | RAB1A, member RAS oncogene family pseudogene                                      |
| 100131289 | LOC100131289 | similar to hCG1820927                                                             |
| 80212     | CCDC92       | coiled-coil domain containing 92                                                  |
| 5199      | CFP          | complement factor properdin                                                       |
| 339669    | C22orf33     | chromosome 22 open reading frame 33                                               |
| 92822     | ZNF276       | zinc finger protein 276                                                           |
| 23180     | RFTN1        | raftlin, lipid raft linker 1                                                      |
| 9921      | RNF10        | ring finger protein 10                                                            |
| 91408     | BTF3L4       | basic transcription factor 3-like 4                                               |
| 119765    | OR4B1        | olfactory receptor, family 4, subfamily B, member 1                               |
| 8470      | SORBS2       | sorbin and SH3 domain containing 2                                                |
| 100131568 | LOC100131568 | RNA binding motif protein 43 pseudogene                                           |
| 8209      | C21orf33     | chromosome 21 open reading frame 33                                               |
| 202122    | RPL27P10     | ribosomal protein L27 pseudogene 10                                               |
| 121727    | PEX12P1      | peroxisomal biogenesis factor 12 pseudogene 1                                     |
| 91526     | ANKRD44      | ankyrin repeat domain 44                                                          |
| 406911    | MIR125B1     | microRNA 125b-1                                                                   |
| 2315      | MLANA        | melan-A                                                                           |

|           |             |                                                                                                                        |
|-----------|-------------|------------------------------------------------------------------------------------------------------------------------|
| 79533     | OR52E3P     | olfactory receptor, family 52, subfamily E, member 3 pseudogene                                                        |
| 319144    | RPL21P13    | ribosomal protein L21 pseudogene 13                                                                                    |
| 57520     | HECW2       | HECT, C2 and WW domain containing E3 ubiquitin protein ligase 2                                                        |
| 5693      | PSMB5       | proteasome (prosome, macropain) subunit, beta type, 5                                                                  |
| 140831    | ZSWIM3      | zinc finger, SWIM-type containing 3                                                                                    |
| 55743     | CHFR        | checkpoint with forkhead and ring finger domains                                                                       |
| 64711     | HS3ST6      | heparan sulfate (glucosamine) 3-O-sulfotransferase 6                                                                   |
| 647633    | LOC647633   | hypothetical LOC647633                                                                                                 |
| 6007      | RHD         | Rh blood group, D antigen                                                                                              |
| 7564      | ZNF16       | zinc finger protein 16                                                                                                 |
| 5145      | PDE6A       | phosphodiesterase 6A, cGMP-specific, rod, alpha                                                                        |
| 1645      | AKR1C1      | aldo-keto reductase family 1, member C1 (dihydrodiol dehydrogenase 1; 20-alpha (3-alpha)-hydroxysteroid dehydrogenase) |
| 286148    | DPY19L4     | dpy-19-like 4 (C. elegans)                                                                                             |
| 128611    | ZNF831      | zinc finger protein 831                                                                                                |
| 6627      | SNRPA1      | small nuclear ribonucleoprotein polypeptide A'                                                                         |
| 122876    | GPHB5       | glycoprotein hormone beta 5                                                                                            |
| 2702      | GJA5        | gap junction protein, alpha 5, 40kDa                                                                                   |
| 9620      | CELSR1      | cadherin, EGF LAG seven-pass G-type receptor 1 (flamingo homolog, Drosophila)                                          |
| 9967      | THRAP3      | thyroid hormone receptor associated protein 3                                                                          |
| 83723     | FAM57B      | family with sequence similarity 57, member B                                                                           |
| 4051      | CYP4F3      | cytochrome P450, family 4, subfamily F, polypeptide 3                                                                  |
| 51702     | PADI3       | peptidyl arginine deiminase, type III                                                                                  |
| 160518    | DENND5B     | DENN/MADD domain containing 5B                                                                                         |
| 729486    | IL9RP3      | interleukin 9 receptor pseudogene 3                                                                                    |
| 27241     | BBS9        | Bardet-Biedl syndrome 9                                                                                                |
| 64943     | NT5DC2      | 5'-nucleotidase domain containing 2                                                                                    |
| 1946      | EFNA5       | ephrin-A5                                                                                                              |
| 387129    | NPSR1       | neuropeptide S receptor 1                                                                                              |
| 727969    | TSPY16P     | testis specific protein, Y-linked 16, pseudogene                                                                       |
| 50618     | ITSN2       | intersectin 2                                                                                                          |
| 100131476 | [No Symbol] | [No Name]                                                                                                              |
| 646908    | [No Symbol] | [No Name]                                                                                                              |
| 389432    | SAMD5       | sterile alpha motif domain containing 5                                                                                |
| 130026    | ICA1L       | islet cell autoantigen 1,69kDa-like                                                                                    |
| 23434     | C3orf27     | chromosome 3 open reading frame 27                                                                                     |

|           |             |                                                                              |
|-----------|-------------|------------------------------------------------------------------------------|
| 285647    | LOC285647   | suppressor of defective silencing 3 pseudogene                               |
| 84240     | ZCCHC9      | zinc finger, CCHC domain containing 9                                        |
| 128668    | RPL7AP12    | ribosomal protein L7a pseudogene 12                                          |
| 731741    | RPL32P12    | ribosomal protein L32 pseudogene 12                                          |
| 9421      | HAND1       | heart and neural crest derivatives expressed 1                               |
| 4151      | MB          | myoglobin                                                                    |
| 57165     | GJC2        | gap junction protein, gamma 2, 47kDa                                         |
| 644618    | [No Symbol] | [No Name]                                                                    |
| 1717      | DHCR7       | 7-dehydrocholesterol reductase                                               |
| 132864    | CPEB2       | cytoplasmic polyadenylation element binding protein 2                        |
| 3875      | KRT18       | keratin 18                                                                   |
| 148867    | SLC30A7     | solute carrier family 30 (zinc transporter), member 7                        |
| 285829    | SUMO2P1     | SMT3 suppressor of mif two 3 homolog 2 ( <i>S. cerevisiae</i> ) pseudogene 1 |
| 219790    | RTKN2       | rhotekin 2                                                                   |
| 109       | ADCY3       | adenylate cyclase 3                                                          |
| 728599    | CIAPIN1P    | cytokine induced apoptosis inhibitor 1 pseudogene                            |
| 946       | SIGLEC6     | sialic acid binding Ig-like lectin 6                                         |
| 345571    | LOC345571   | RUN and FYVE domain containing 3 pseudogene                                  |
| 7348      | UPK1B       | uroplakin 1B                                                                 |
| 128370    | OR6K4P      | olfactory receptor, family 6, subfamily K, member 4 pseudogene               |
| 153643    | FAM81B      | family with sequence similarity 81, member B                                 |
| 23601     | CLEC5A      | C-type lectin domain family 5, member A                                      |
| 157570    | ESCO2       | establishment of cohesion 1 homolog 2 ( <i>S. cerevisiae</i> )               |
| 26577     | PCOLCE2     | procollagen C-endopeptidase enhancer 2                                       |
| 79865     | TREML2      | triggering receptor expressed on myeloid cells-like 2                        |
| 100128169 | [No Symbol] | [No Name]                                                                    |
| 127534    | GJB4        | gap junction protein, beta 4, 30.3kDa                                        |
| 2624      | GATA2       | GATA binding protein 2                                                       |
| 144193    | AMDHD1      | amidohydrolase domain containing 1                                           |
| 23293     | SMG6        | Smg-6 homolog, nonsense mediated mRNA decay factor ( <i>C. elegans</i> )     |
| 441720    | [No Symbol] | [No Name]                                                                    |
| 79576     | NKAP        | NFKB activating protein                                                      |
| 8301      | PICALM      | phosphatidylinositol binding clathrin assembly protein                       |
| 90113     | VWA5B2      | von Willebrand factor A domain containing 5B2                                |
| 677846    | SNORA80     | small nucleolar RNA, H/ACA box 80                                            |

|           |              |                                                                                               |
|-----------|--------------|-----------------------------------------------------------------------------------------------|
| 390081    | OR52E4       | olfactory receptor, family 52, subfamily E, member 4                                          |
| 56203     | LMOD3        | leiomodin 3 (fetal)                                                                           |
| 10112     | KIF20A       | kinesin family member 20A                                                                     |
| 442184    | OR2B3        | olfactory receptor, family 2, subfamily B, member 3                                           |
| 100129497 | LOC100129497 | chromosome 14 open reading frame 138 pseudogene                                               |
| 2673      | GFPT1        | glutamine--fructose-6-phosphate transaminase 1                                                |
| 1977      | EIF4E        | eukaryotic translation initiation factor 4E                                                   |
| 84894     | LINGO1       | leucine rich repeat and Ig domain containing 1                                                |
| 5127      | CDK16        | cyclin-dependent kinase 16                                                                    |
| 51429     | SNX9         | sorting nexin 9                                                                               |
| 51466     | EVL          | Enah/Vasp-like                                                                                |
| 389332    | LOC389332    | hypothetical LOC389332                                                                        |
| 2044      | EPHA5        | EPH receptor A5                                                                               |
| 9122      | SLC16A4      | solute carrier family 16, member 4 (monocarboxylic acid transporter 5)                        |
| 2635      | GBP3         | guanylate binding protein 3                                                                   |
| 729454    | LOC729454    | destrin-like                                                                                  |
| 100132989 | [No Symbol]  | [No Name]                                                                                     |
| 392368    | LOC392368    | BEN domain containing 3 pseudogene                                                            |
| 5270      | SERPINE2     | serpin peptidase inhibitor, clade E (nexin, plasminogen activator inhibitor type 1), member 2 |
| 653794    | TRIM60P14    | tripartite motif containing 60 pseudogene 14                                                  |
| 286122    | C8orf31      | chromosome 8 open reading frame 31                                                            |
| 5936      | RBM4         | RNA binding motif protein 4                                                                   |
| 80119     | PIF1         | PIF1 5'-to-3' DNA helicase homolog ( <i>S. cerevisiae</i> )                                   |
| 7098      | TLR3         | toll-like receptor 3                                                                          |
| 100128119 | MCART5P      | mitochondrial carrier triple repeat 5 pseudogene                                              |
| 5739      | PTGIR        | prostaglandin I2 (prostacyclin) receptor (IP)                                                 |
| 729626    | LOC729626    | hypothetical protein LOC729626                                                                |
| 81569     | ACTL8        | actin-like 8                                                                                  |
| 3664      | IRF6         | interferon regulatory factor 6                                                                |
| 5348      | FXYD1        | FXYD domain containing ion transport regulator 1                                              |
| 442920    | MIR196B      | microRNA 196b                                                                                 |
| 81695     | OR2B7P       | olfactory receptor, family 2, subfamily B, member 7 pseudogene                                |
| 54901     | CDKAL1       | CDK5 regulatory subunit associated protein 1-like 1                                           |
| 9528      | TMEM59       | transmembrane protein 59                                                                      |
| 153768    | PRELID2      | PRELI domain containing 2                                                                     |

|           |              |                                                                           |
|-----------|--------------|---------------------------------------------------------------------------|
| 128338    | DRAM2        | DNA-damage regulated autophagy modulator 2                                |
| 28387     | IGHV5-78     | immunoglobulin heavy variable 5-78 (pseudogene)                           |
| 4867      | NPHP1        | nephronophthisis 1 (juvenile)                                             |
| 27178     | IL37         | interleukin 37                                                            |
| 10670     | RRAGA        | Ras-related GTP binding A                                                 |
| 26103     | LRIT1        | leucine-rich repeat, immunoglobulin-like and transmembrane domains 1      |
| 79800     | ALS2CR8      | amyotrophic lateral sclerosis 2 (juvenile) chromosome region, candidate 8 |
| 389384    | C6orf222     | chromosome 6 open reading frame 222                                       |
| 9963      | SLC23A1      | solute carrier family 23 (nucleobase transporters), member 1              |
| 54507     | ADAMTSL4     | ADAMTS-like 4                                                             |
| 79609     | METTL21D     | methyltransferase like 21D                                                |
| 9474      | ATG5         | ATG5 autophagy related 5 homolog ( <i>S. cerevisiae</i> )                 |
| 100128437 | LOC100128437 | hypothetical protein LOC100128437                                         |
| 11019     | LIAS         | lipoic acid synthetase                                                    |
| 100132937 | [No Symbol]  | [No Name]                                                                 |
| 51309     | ARMCX1       | armadillo repeat containing, X-linked 1                                   |
| 25898     | RCHY1        | ring finger and CHY zinc finger domain containing 1                       |
| 493913    | PAPPA-AS1    | PAPPA antisense RNA 1 (non-protein coding)                                |
| 503583    | ARGFXP1      | arginine-fifty homeobox pseudogene 1                                      |
| 4343      | MOV10        | Mov10, Moloney leukemia virus 10, homolog (mouse)                         |
| 1298      | COL9A2       | collagen, type IX, alpha 2                                                |
| 167153    | PAPD4        | PAP associated domain containing 4                                        |
| 566       | AZU1         | azurocidin 1                                                              |
| 121296    | LOC121296    | transmembrane protein 132B pseudogene                                     |
| 6430      | SRSF5        | serine/arginine-rich splicing factor 5                                    |
| 100129909 | [No Symbol]  | [No Name]                                                                 |
| 84307     | ZNF397       | zinc finger protein 397                                                   |
| 55075     | UACA         | uveal autoantigen with coiled-coil domains and ankyrin repeats            |
| 150737    | TTC30B       | tetratricopeptide repeat domain 30B                                       |
| 83479     | DDX59        | DEAD (Asp-Glu-Ala-Asp) box polypeptide 59                                 |
| 1991      | ELANE        | elastase, neutrophil expressed                                            |
| 2499      | FTH1P4       | ferritin, heavy polypeptide 1 pseudogene 4                                |
| 57121     | LPAR5        | lysophosphatidic acid receptor 5                                          |
| 8522      | GAS7         | growth arrest-specific 7                                                  |
| 170960    | ZNF721       | zinc finger protein 721                                                   |

|           |              |                                                                                 |
|-----------|--------------|---------------------------------------------------------------------------------|
| 150709    | ANKAR        | ankyrin and armadillo repeat containing                                         |
| 202020    | FLJ39653     | hypothetical FLJ39653                                                           |
| 51816     | CECR1        | cat eye syndrome chromosome region, candidate 1                                 |
| 100131706 | [No Symbol]  | [No Name]                                                                       |
| 23383     | MAU2         | MAU2 chromatid cohesion factor homolog (C. elegans)                             |
| 22906     | TRAK1        | trafficking protein, kinesin binding 1                                          |
| 80319     | CXXC4        | CXXC finger protein 4                                                           |
| 26140     | TTLL3        | tubulin tyrosine ligase-like family, member 3                                   |
| 389136    | VGLL3        | vestigial like 3 (Drosophila)                                                   |
| 9162      | DGKI         | diacylglycerol kinase, iota                                                     |
| 387119    | C6orf204     | chromosome 6 open reading frame 204                                             |
| 4179      | CD46         | CD46 molecule, complement regulatory protein                                    |
| 10718     | NRG3         | neuregulin 3                                                                    |
| 9108      | MTMR7        | myotubularin related protein 7                                                  |
| 55908     | LOC55908     | hepatocellular carcinoma-associated gene TD26                                   |
| 79699     | ZYG11B       | zyg-11 homolog B (C. elegans)                                                   |
| 79673     | ZNF329       | zinc finger protein 329                                                         |
| 302       | ANXA2        | annexin A2                                                                      |
| 4698      | NDUFA5       | NADH dehydrogenase (ubiquinone) 1 alpha subcomplex, 5, 13kDa                    |
| 6611      | SMS          | spermine synthase                                                               |
| 100132083 | [No Symbol]  | [No Name]                                                                       |
| 3910      | LAMA4        | laminin, alpha 4                                                                |
| 9705      | ST18         | suppression of tumorigenicity 18 (breast carcinoma) (zinc finger protein)       |
| 642513    | LOC642513    | BTB/POZ domain-containing protein KCTD9-like                                    |
| 100132679 | [No Symbol]  | [No Name]                                                                       |
| 7791      | ZYX          | zyxin                                                                           |
| 5778      | PTPN7        | protein tyrosine phosphatase, non-receptor type 7                               |
| 1014      | CDH16        | cadherin 16, KSP-cadherin                                                       |
| 94015     | TTYH2        | tweety homolog 2 (Drosophila)                                                   |
| 440044    | SLC22A20     | solute carrier family 22, member 20                                             |
| 9551      | ATP5J2       | ATP synthase, H <sup>+</sup> transporting, mitochondrial Fo complex, subunit F2 |
| 29765     | TMOD4        | tropomodulin 4 (muscle)                                                         |
| 220136    | CCDC11       | coiled-coil domain containing 11                                                |
| 100132116 | LOC100132116 | hypothetical LOC100132116                                                       |
| 392382    | RPL31P43     | ribosomal protein L31 pseudogene 43                                             |

|           |             |                                                                                          |
|-----------|-------------|------------------------------------------------------------------------------------------|
| 80196     | RNF34       | ring finger protein 34                                                                   |
| 90990     | KIFC2       | kinesin family member C2                                                                 |
| 441795    | HMGB3P27    | high mobility group box 3 pseudogene 27                                                  |
| 9470      | EIF4E2      | eukaryotic translation initiation factor 4E family member 2                              |
| 6535      | SLC6A8      | solute carrier family 6 (neurotransmitter transporter, creatine), member 8               |
| 392540    | OR11N1P     | olfactory receptor, family 11, subfamily N, member 1 pseudogene                          |
| 120425    | AMICA1      | adhesion molecule, interacts with CXADR antigen 1                                        |
| 392288    | LOC392288   | microtubule-associated proteins 1A/1B light chain 3B-like                                |
| 100129944 | [No Symbol] | [No Name]                                                                                |
| 100129279 | RPS27P14    | ribosomal protein S27 pseudogene 14                                                      |
| 54704     | PDP1        | pyruvate dehydrogenase phosphatase catalytic subunit 1                                   |
| 339210    | C17orf67    | chromosome 17 open reading frame 67                                                      |
| 8435      | SOAT2       | sterol O-acyltransferase 2                                                               |
| 100130095 | [No Symbol] | [No Name]                                                                                |
| 89958     | C9orf140    | chromosome 9 open reading frame 140                                                      |
| 404201    | NCRNA00247  | non-protein coding RNA 247                                                               |
| 78991     | PCYOX1L     | prenylcysteine oxidase 1 like                                                            |
| 23480     | SEC61G      | Sec61 gamma subunit                                                                      |
| 3141      | HLCS        | holocarboxylase synthetase (biotin-(propionyl-CoA-carboxylase (ATP-hydrolysing)) ligase) |
| 84848     | MGC16121    | hypothetical protein MGC16121                                                            |
| 26115     | TANC2       | tetratricopeptide repeat, ankyrin repeat and coiled-coil containing 2                    |
| 151531    | UPP2        | uridine phosphorylase 2                                                                  |
| 255220    | TXNDC8      | thioredoxin domain containing 8 (spermatzoa)                                             |
| 3872      | KRT17       | keratin 17                                                                               |
| 100130183 | RPS24P19    | ribosomal protein S24 pseudogene 19                                                      |
| 7299      | TYR         | tyrosinase (oculocutaneous albinism IA)                                                  |
| 28962     | OSTM1       | osteopetrosis associated transmembrane protein 1                                         |
| 64174     | DPEP2       | dipeptidase 2                                                                            |
| 27443     | CECR2       | cat eye syndrome chromosome region, candidate 2                                          |
| 51084     | CRYL1       | crystallin, lambda 1                                                                     |
| 11030     | RBPMS       | RNA binding protein with multiple splicing                                               |
| 339967    | TMPRSS11A   | transmembrane protease, serine 11A                                                       |
| 768096    | HAR1A       | highly accelerated region 1A (non-protein coding)                                        |
| 645054    | RPL6P4      | ribosomal protein L6 pseudogene 4                                                        |
| 4849      | CNOT3       | CCR4-NOT transcription complex, subunit 3                                                |

|           |             |                                                                               |
|-----------|-------------|-------------------------------------------------------------------------------|
| 139422    | MAGEB10     | melanoma antigen family B, 10                                                 |
| 30844     | EHD4        | EH-domain containing 4                                                        |
| 11251     | GPR44       | G protein-coupled receptor 44                                                 |
| 381       | ARF5        | ADP-ribosylation factor 5                                                     |
| 26191     | PTPN22      | protein tyrosine phosphatase, non-receptor type 22 (lymphoid)                 |
| 100129238 | [No Symbol] | [No Name]                                                                     |
| 26062     | HYALP1      | hyaluronoglucosaminidase pseudogene 1                                         |
| 729126    | LOC729126   | GrpE-like 1, mitochondrial (E. coli) pseudogene                               |
| 171024    | SYNPO2      | synaptopodin 2                                                                |
| 642762    | LOC642762   | hCG2042779                                                                    |
| 1531      | CYB5AP3     | cytochrome b5 type A (microsomal) pseudogene 3                                |
| 642496    | LOC642496   | UDP glucuronosyltransferase 2 family, polypeptide A3 pseudogene               |
| 84176     | MYH16       | myosin, heavy chain 16 pseudogene                                             |
| 83787     | ARMC10      | armadillo repeat containing 10                                                |
| 143279    | HECTD2      | HECT domain containing 2                                                      |
| 51239     | ANKRD39     | ankyrin repeat domain 39                                                      |
| 4482      | MSRA        | methionine sulfoxide reductase A                                              |
| 644672    | CLDN25      | claudin 25                                                                    |
| 100131595 | [No Symbol] | [No Name]                                                                     |
| 29124     | LGALS13     | lectin, galactoside-binding, soluble, 13                                      |
| 6860      | SYT4        | synaptotagmin IV                                                              |
| 57509     | MTUS1       | microtubule associated tumor suppressor 1                                     |
| 127011    | LOC127011   | ATPase, H <sup>+</sup> transporting, lysosomal accessory protein 2 pseudogene |
| 114781    | BTBD9       | BTB (POZ) domain containing 9                                                 |
| 3189      | HNRNPH3     | heterogeneous nuclear ribonucleoprotein H3 (2H9)                              |
| 115294    | PCMTD1      | protein-L-isoaspartate (D-aspartate) O-methyltransferase domain containing 1  |
| 171586    | ABHD3       | abhydrolase domain containing 3                                               |
| 6004      | RGS16       | regulator of G-protein signaling 16                                           |
| 10950     | BTG3        | BTG family, member 3                                                          |
| 27180     | SIGLEC9     | sialic acid binding Ig-like lectin 9                                          |
| 993       | CDC25A      | cell division cycle 25 homolog A (S. pombe)                                   |
| 9886      | RHOBTB1     | Rho-related BTB domain containing 1                                           |
| 5803      | PTPRZ1      | protein tyrosine phosphatase, receptor-type, Z polypeptide 1                  |
| 5782      | PTPN12      | protein tyrosine phosphatase, non-receptor type 12                            |
| 64922     | LRRC19      | leucine rich repeat containing 19                                             |



|           |              |                                                                    |
|-----------|--------------|--------------------------------------------------------------------|
| 100132537 | LOC100132537 | dedicator of cytokinesis protein 11-like                           |
| 100129803 | [No Symbol]  | [No Name]                                                          |
| 4607      | MYBPC3       | myosin binding protein C, cardiac                                  |
| 100132267 | [No Symbol]  | [No Name]                                                          |
| 339896    | GADL1        | glutamate decarboxylase-like 1                                     |
| 7225      | TRPC6        | transient receptor potential cation channel, subfamily C, member 6 |
| 85236     | HIST1H2BK    | histone cluster 1, H2bk                                            |
| 374946    | C1orf187     | chromosome 1 open reading frame 187                                |
| 81324     | OR4A19P      | olfactory receptor, family 4, subfamily A, member 19 pseudogene    |
| 135154    | C6orf57      | chromosome 6 open reading frame 57                                 |
| 1278      | COL1A2       | collagen, type I, alpha 2                                          |
| 55319     | C4orf43      | chromosome 4 open reading frame 43                                 |
| 100131251 | [No Symbol]  | [No Name]                                                          |
| 23057     | NMNAT2       | nicotinamide nucleotide adenylyltransferase 2                      |
| 54861     | SNRK         | SNF related kinase                                                 |
| 24147     | FJX1         | four jointed box 1 (Drosophila)                                    |
| 147468    | WBP2P1       | WW domain binding protein 2 pseudogene 1                           |
| 100131085 | RPL7P12      | ribosomal protein L7 pseudogene 12                                 |
| 84947     | SERAC1       | serine active site containing 1                                    |
| 549       | AUH          | AU RNA binding protein/enoyl-CoA hydratase                         |
| 146853    | C17orf50     | chromosome 17 open reading frame 50                                |
| 51673     | TPPP3        | tubulin polymerization-promoting protein family member 3           |
| 286103    | C8orf77      | chromosome 8 open reading frame 77                                 |
| 7089      | TLE2         | transducin-like enhancer of split 2 (E(sp1) homolog, Drosophila)   |
| 285381    | DPH3         | DPH3, KTI11 homolog (S. cerevisiae)                                |
| 440955    | TMEM89       | transmembrane protein 89                                           |
| 391518    | VENTXP7      | VENT homeobox pseudogene 7                                         |
| 9749      | PHACTR2      | phosphatase and actin regulator 2                                  |
| 6337      | SCNN1A       | sodium channel, nonvoltage-gated 1 alpha                           |
| 388407    | C17orf82     | chromosome 17 open reading frame 82                                |
| 400891    | LOC400891    | chromosome 14 open reading frame 166B pseudogene                   |
| 3428      | IFI16        | interferon, gamma-inducible protein 16                             |
| 222553    | SLC35F1      | solute carrier family 35, member F1                                |
| 10753     | CAPN9        | calpain 9                                                          |
| 81616     | ACSBG2       | acyl-CoA synthetase bubblegum family member 2                      |

|           |             |                                                                 |
|-----------|-------------|-----------------------------------------------------------------|
| 127002    | ATXN7L2     | ataxin 7-like 2                                                 |
| 283514    | SIAH3       | seven in absentia homolog 3 (Drosophila)                        |
| 100132808 | RBMX2P2     | RNA binding motif protein, X-linked 2 pseudogene 2              |
| 1662      | DDX10       | DEAD (Asp-Glu-Ala-Asp) box polypeptide 10                       |
| 5094      | PCBP2       | poly(rC) binding protein 2                                      |
| 11124     | FAF1        | Fas (TNFRSF6) associated factor 1                               |
| 3150      | HMGN1       | high mobility group nucleosome binding domain 1                 |
| 128153    | SPATA17     | spermatogenesis associated 17                                   |
| 154386    | C6orf195    | chromosome 6 open reading frame 195                             |
| 1532      | CYB5AP4     | cytochrome b5 type A (microsomal) pseudogene 4                  |
| 84734     | FAM167B     | family with sequence similarity 167, member B                   |
| 54040     | PCBP2P1     | poly(rC) binding protein 2 pseudogene 1                         |
| 2623      | GATA1       | GATA binding protein 1 (globin transcription factor 1)          |
| 401934    | RNF223      | ring finger protein 223                                         |
| 118856    | MMP21       | matrix metalloproteinase 21                                     |
| 57674     | RNF213      | ring finger protein 213                                         |
| 347333    | KRT8P14     | keratin 8 pseudogene 14                                         |
| 400617    | FLJ36644    | hypothetical LOC400617                                          |
| 6293      | VPS52       | vacuolar protein sorting 52 homolog (S. cerevisiae)             |
| 100131498 | [No Symbol] | [No Name]                                                       |
| 129560    | LOC129560   | adenosylhomocysteinase pseudogene                               |
| 137107    | RPL10AP3    | ribosomal protein L10a pseudogene 3                             |
| 148103    | ZNF599      | zinc finger protein 599                                         |
| 125228    | C18orf19    | chromosome 18 open reading frame 19                             |
| 3566      | IL4R        | interleukin 4 receptor                                          |
| 727721    | LOC727721   | hypothetical LOC727721                                          |
| 2173      | FABP7       | fatty acid binding protein 7, brain                             |
| 10265     | IRX5        | iroquois homeobox 5                                             |
| 5912      | RAP2B       | RAP2B, member of RAS oncogene family                            |
| 4943      | TBC1D25     | TBC1 domain family, member 25                                   |
| 645922    | S100A7L2    | S100 calcium binding protein A7-like 2                          |
| 55824     | PAG1        | phosphoprotein associated with glycosphingolipid microdomains 1 |
| 150244    | ZDHC8P1     | zinc finger, DHHC-type containing 8 pseudogene 1                |
| 729832    | LOC729832   | glutathione S-transferase theta-1-like                          |
| 407024    | MIR29B1     | microRNA 29b-1                                                  |

|           |             |                                                                     |
|-----------|-------------|---------------------------------------------------------------------|
| 553148    | LOC553148   | PAI-1 mRNA binding protein pseudogene                               |
| 79094     | CHAC1       | ChaC, cation transport regulator homolog 1 (E. coli)                |
| 100131439 | CD300LD     | CD300 molecule-like family member d                                 |
| 81558     | FAM117A     | family with sequence similarity 117, member A                       |
| 84265     | POLR3GL     | polymerase (RNA) III (DNA directed) polypeptide G (32kD)-like       |
| 80336     | PABPC1L     | poly(A) binding protein, cytoplasmic 1-like                         |
| 140730    | RIMS4       | regulating synaptic membrane exocytosis 4                           |
| 152519    | NIPAL1      | NIPA-like domain containing 1                                       |
| 124221    | PRSS30P     | protease, serine, 30 homolog (mouse), pseudogene                    |
| 1496      | CTNNA2      | catenin (cadherin-associated protein), alpha 2                      |
| 79864     | C11orf63    | chromosome 11 open reading frame 63                                 |
| 100131827 | ZNF717      | zinc finger protein 717                                             |
| 60509     | AGBL5       | ATP/GTP binding protein-like 5                                      |
| 100132303 | [No Symbol] | [No Name]                                                           |
| 151295    | SLC23A3     | solute carrier family 23 (nucleobase transporters), member 3        |
| 4692      | NDN         | necdin homolog (mouse)                                              |
| 6710      | SPTB        | spectrin, beta, erythrocytic                                        |
| 5798      | PTPRN       | protein tyrosine phosphatase, receptor type, N                      |
| 55146     | ZDHC4       | zinc finger, DHHC-type containing 4                                 |
| 4129      | MAOB        | monoamine oxidase B                                                 |
| 11035     | RIPK3       | receptor-interacting serine-threonine kinase 3                      |
| 401663    | OR51H1P     | olfactory receptor, family 51, subfamily H, member 1 pseudogene     |
| 9813      | KIAA0494    | KIAA0494                                                            |
| 5770      | PTPN1       | protein tyrosine phosphatase, non-receptor type 1                   |
| 3739      | KCNA4       | potassium voltage-gated channel, shaker-related subfamily, member 4 |
| 11022     | TDRKH       | tudor and KH domain containing                                      |
| 1143      | CHRNB4      | cholinergic receptor, nicotinic, beta 4                             |
| 389043    | LOC389043   | hypothetical LOC389043                                              |
| 54868     | TMEM104     | transmembrane protein 104                                           |
| 9537      | TP53I11     | tumor protein p53 inducible protein 11                              |
| 8648      | NCOA1       | nuclear receptor coactivator 1                                      |
| 1387      | CREBBP      | CREB binding protein                                                |
| 138802    | OR13C8      | olfactory receptor, family 13, subfamily C, member 8                |
| 9584      | RBM39       | RNA binding motif protein 39                                        |
| 3972      | LHB         | luteinizing hormone beta polypeptide                                |

|           |              |                                                        |
|-----------|--------------|--------------------------------------------------------|
| 143       | PARP4        | poly (ADP-ribose) polymerase family, member 4          |
| 164237    | WFDC13       | WAP four-disulfide core domain 13                      |
| 100132486 | [No Symbol]  | [No Name]                                              |
| 1629      | DBT          | dihydrolipoamide branched chain transacylase E2        |
| 2916      | GRM6         | glutamate receptor, metabotropic 6                     |
| 100132707 | LOC100132707 | hypothetical LOC100132707                              |
| 23113     | CUL9         | cullin 9                                               |
| 645805    | LOC645805    | deleted in azoospermia associated protein 2 pseudogene |
| 728682    | [No Symbol]  | [No Name]                                              |
| 113730    | KLHDC7B      | kelch domain containing 7B                             |
| 284648    | LOC284648    | hypothetical LOC284648                                 |
| 256356    | GK5          | glycerol kinase 5 (putative)                           |
| 53353     | LRP1B        | low density lipoprotein receptor-related protein 1B    |
| 8820      | HESX1        | HESX homeobox 1                                        |
| 100130717 | CECR5-AS1    | CECR5 antisense RNA 1 (non-protein coding)             |
| 81832     | NETO1        | neuropilin (NRP) and tolloid (TLL)-like 1              |
| 57597     | BAHCC1       | BAH domain and coiled-coil containing 1                |
| 100129231 | LOC100129231 | heat shock 70kDa protein 8 pseudogene                  |
| 283219    | KCTD21       | potassium channel tetramerisation domain containing 21 |
| 728780    | ANKDD1B      | ankyrin repeat and death domain containing 1B          |
| 56882     | CDC42SE1     | CDC42 small effector 1                                 |
| 642631    | TSPY15P      | testis specific protein, Y-linked 15, pseudogene       |
| 100128232 | [No Symbol]  | [No Name]                                              |
| 84532     | ACSS1        | acyl-CoA synthetase short-chain family member 1        |
| 27348     | TOR1B        | torsin family 1, member B (torsin B)                   |
| 119       | ADD2         | adducin 2 (beta)                                       |
| 100128601 | LOC100128601 | zinc finger protein 770 pseudogene                     |
| 400866    | NCRNA00114   | non-protein coding RNA 114                             |
| 221400    | TDRD6        | tudor domain containing 6                              |
| 1058      | CENPA        | centromere protein A                                   |
| 58472     | SQRDL        | sulfide quinone reductase-like (yeast)                 |
| 100130613 | CXorf64      | chromosome X open reading frame 64                     |
| 10415     | SNAI1P1      | snail homolog 1 (Drosophila) pseudogene 1              |
| 4899      | NRF1         | nuclear respiratory factor 1                           |
| 401409    | RAB19        | RAB19, member RAS oncogene family                      |

|           |              |                                                                                      |
|-----------|--------------|--------------------------------------------------------------------------------------|
| 9423      | NTN1         | netrin 1                                                                             |
| 54544     | CRCT1        | cysteine-rich C-terminal 1                                                           |
| 83891     | SNX25        | sorting nexin 25                                                                     |
| 83692     | CD99L2       | CD99 molecule-like 2                                                                 |
| 344022    | NOTO         | notochord homeobox                                                                   |
| 554210    | MIR429       | microRNA 429                                                                         |
| 25970     | SH2B1        | SH2B adaptor protein 1                                                               |
| 51023     | MRPS18C      | mitochondrial ribosomal protein S18C                                                 |
| 337979    | KRTAP22-1    | keratin associated protein 22-1                                                      |
| 55201     | MAP1S        | microtubule-associated protein 1S                                                    |
| 163126    | EID2         | EP300 interacting inhibitor of differentiation 2                                     |
| 100129163 | [No Symbol]  | [No Name]                                                                            |
| 60682     | SMAP1        | small ArfGAP 1                                                                       |
| 100133225 | LOC100133225 | zinc finger, DHHC-type containing 7 pseudogene                                       |
| 9223      | MAGI1        | membrane associated guanylate kinase, WW and PDZ domain containing 1                 |
| 647109    | [No Symbol]  | [No Name]                                                                            |
| 453       | ASS1P8       | argininosuccinate synthetase 1 pseudogene 8                                          |
| 100130219 | LOC100130219 | hypothetical LOC100130219                                                            |
| 1666      | DECR1        | 2,4-dienoyl CoA reductase 1, mitochondrial                                           |
| 195977    | ANTXRL       | anthrax toxin receptor-like                                                          |
| 114569    | MAL2         | mal, T-cell differentiation protein 2 (gene/pseudogene)                              |
| 51642     | MRPL48       | mitochondrial ribosomal protein L48                                                  |
| 4241      | MF12         | antigen p97 (melanoma associated) identified by monoclonal antibodies 133.2 and 96.5 |
| 5118      | PCOLCE       | procollagen C-endopeptidase enhancer                                                 |
| 4839      | NOP2         | NOP2 nucleolar protein homolog (yeast)                                               |
| 140886    | PABPC5       | poly(A) binding protein, cytoplasmic 5                                               |
| 57019     | CIAPIN1      | cytokine induced apoptosis inhibitor 1                                               |
| 8744      | TNFSF9       | tumor necrosis factor (ligand) superfamily, member 9                                 |
| 401242    | LOC401242    | hypothetical LOC401242                                                               |
| 23566     | LPAR3        | lysophosphatidic acid receptor 3                                                     |
| 11017     | SNRNP27      | small nuclear ribonucleoprotein 27kDa (U4/U6.U5)                                     |
| 100133097 | LOC100133097 | hypothetical LOC100133097                                                            |
| 200403    | VWA3B        | von Willebrand factor A domain containing 3B                                         |
| 100131801 | LOC100131801 | hypothetical protein LOC100131801                                                    |
| 26137     | ZBTB20       | zinc finger and BTB domain containing 20                                             |

|           |              |                                                                                                                  |
|-----------|--------------|------------------------------------------------------------------------------------------------------------------|
| 149650    | FLJ32154     | hypothetical protein FLJ32154                                                                                    |
| 221476    | PI16         | peptidase inhibitor 16                                                                                           |
| 284998    | LOC284998    | hypothetical LOC284998                                                                                           |
| 54503     | ZDHC13       | zinc finger, DHC-type containing 13                                                                              |
| 57451     | ODZ2         | odz, odd Oz/ten-m homolog 2 (Drosophila)                                                                         |
| 10244     | RABEPK       | Rab9 effector protein with kelch motifs                                                                          |
| 57795     | FAM5B        | family with sequence similarity 5, member B                                                                      |
| 23063     | WAPAL        | wings apart-like homolog (Drosophila)                                                                            |
| 5828      | PEX2         | peroxisomal biogenesis factor 2                                                                                  |
| 51106     | TFB1M        | transcription factor B1, mitochondrial                                                                           |
| 100133095 | [No Symbol]  | [No Name]                                                                                                        |
| 284313    | [No Symbol]  | [No Name]                                                                                                        |
| 54536     | EXOC6        | exocyst complex component 6                                                                                      |
| 78996     | C7orf49      | chromosome 7 open reading frame 49                                                                               |
| 391681    | LOC391681    | exocyst complex component 7 pseudogene                                                                           |
| 4047      | LSS          | lanosterol synthase (2,3-oxidosqualene-lanosterol cyclase)                                                       |
| 441487    | LOC441487    | methyltransferase like 1 pseudogene                                                                              |
| 2357      | FPR1         | formyl peptide receptor 1                                                                                        |
| 353116    | RILPL1       | Rab interacting lysosomal protein-like 1                                                                         |
| 100131240 | [No Symbol]  | [No Name]                                                                                                        |
| 1909      | EDNRA        | endothelin receptor type A                                                                                       |
| 10485     | C1orf61      | chromosome 1 open reading frame 61                                                                               |
| 81159     | OR9G3P       | olfactory receptor, family 9, subfamily G, member 3 pseudogene                                                   |
| 200317    | FLJ23865     | hypothetical protein FLJ23865                                                                                    |
| 100129438 | ZFRP1        | zinc finger RNA binding protein pseudogene 1                                                                     |
| 133923    | ZNF474       | zinc finger protein 474                                                                                          |
| 9350      | CER1         | cerberus 1, cysteine knot superfamily, homolog (Xenopus laevis)                                                  |
| 2665      | GDI2         | GDP dissociation inhibitor 2                                                                                     |
| 65999     | LRR61        | leucine rich repeat containing 61                                                                                |
| 6998      | TDGF3        | teratocarcinoma-derived growth factor 3, pseudogene                                                              |
| 10509     | SEMA4B       | sema domain, immunoglobulin domain (Ig), transmembrane domain (TM) and short cytoplasmic domain, (semaphorin) 4B |
| 729794    | [No Symbol]  | [No Name]                                                                                                        |
| 100129716 | LOC100129716 | hypothetical LOC100129716                                                                                        |
| 91948     | LOC91948     | hypothetical LOC91948                                                                                            |
| 9167      | COX7A2L      | cytochrome c oxidase subunit VIIa polypeptide 2 like                                                             |

|           |              |                                                                         |
|-----------|--------------|-------------------------------------------------------------------------|
| 100130315 | [No Symbol]  | [No Name]                                                               |
| 10462     | CLEC10A      | C-type lectin domain family 10, member A                                |
| 641522    | [No Symbol]  | [No Name]                                                               |
| 7345      | UCHL1        | ubiquitin carboxyl-terminal esterase L1 (ubiquitin thiolesterase)       |
| 644578    | LOC644578    | hypothetical protein LOC644578                                          |
| 100128395 | [No Symbol]  | [No Name]                                                               |
| 2052      | EPHX1        | epoxide hydrolase 1, microsomal (xenobiotic)                            |
| 1445      | CSK          | c-src tyrosine kinase                                                   |
| 285415    | MRPL42P1     | mitochondrial ribosomal protein L42 pseudogene 1                        |
| 57583     | TMEM181      | transmembrane protein 181                                               |
| 64689     | GORASP1      | golgi reassembly stacking protein 1, 65kDa                              |
| 9860      | LRIG2        | leucine-rich repeats and immunoglobulin-like domains 2                  |
| 84324     | SARNP        | SAP domain containing ribonucleoprotein                                 |
| 6856      | SYPL1        | synaptophysin-like 1                                                    |
| 116236    | ABHD15       | abhydrolase domain containing 15                                        |
| 81264     | OR52E7P      | olfactory receptor, family 52, subfamily E, member 7 pseudogene         |
| 10008     | KCNE3        | potassium voltage-gated channel, Isk-related family, member 3           |
| 203111    | C8orf47      | chromosome 8 open reading frame 47                                      |
| 2677      | GGCX         | gamma-glutamyl carboxylase                                              |
| 168002    | DACT2        | dapper, antagonist of beta-catenin, homolog 2 ( <i>Xenopus laevis</i> ) |
| 284116    | KRT42P       | keratin 42 pseudogene                                                   |
| 54476     | RNF216       | ring finger protein 216                                                 |
| 100128081 | LOC100128081 | hypothetical LOC100128081                                               |
| 4154      | MBNL1        | muscleblind-like ( <i>Drosophila</i> )                                  |
| 29085     | PHPT1        | phosphohistidine phosphatase 1                                          |
| 100131530 | LOC100131530 | hypothetical LOC100131530                                               |
| 266673    | ZNF402P      | zinc finger protein 402, pseudogene                                     |
| 100132126 | LOC100132126 | mitochondrial carrier homolog 2 pseudogene                              |
| 8596      | OR4A1P       | olfactory receptor, family 4, subfamily A, member 1 pseudogene          |
| 100130155 | LOC100130155 | hypothetical LOC100130155                                               |
| 100129218 | [No Symbol]  | [No Name]                                                               |
| 728927    | ZNF736       | zinc finger protein 736                                                 |
| 643865    | KRT126P      | keratin 126 pseudogene                                                  |
| 222643    | UNC5CL       | unc-5 homolog C ( <i>C. elegans</i> )-like                              |
| 286480    | UBE2E4P      | ubiquitin-conjugating enzyme E2E 4 pseudogene                           |

|           |              |                                                                                                   |
|-----------|--------------|---------------------------------------------------------------------------------------------------|
| 131961    | IMPDH1P8     | IMP (inosine monophosphate) dehydrogenase 1 pseudogene 8                                          |
| 7321      | UBE2D1       | ubiquitin-conjugating enzyme E2D 1                                                                |
| 100129753 | [No Symbol]  | [No Name]                                                                                         |
| 643168    | LOC643168    | Rho GTPase activating protein 5 pseudogene                                                        |
| 729566    | LOC729566    | protein archease-like                                                                             |
| 644681    | LOC644681    | synovial sarcoma, X breakpoint 2 interacting protein pseudogene                                   |
| 10234     | LRRC17       | leucine rich repeat containing 17                                                                 |
| 54769     | DIRAS2       | DIRAS family, GTP-binding RAS-like 2                                                              |
| 55656     | INTS8        | integrator complex subunit 8                                                                      |
| 55346     | TCP11L1      | t-complex 11 (mouse)-like 1                                                                       |
| 6620      | SNCB         | synuclein, beta                                                                                   |
| 100129876 | [No Symbol]  | [No Name]                                                                                         |
| 727982    | LOC727982    | hypothetical LOC727982                                                                            |
| 100131740 | LOC100131740 | corepressor interacting with RBPJ, 1 pseudogene                                                   |
| 5868      | RAB5A        | RAB5A, member RAS oncogene family                                                                 |
| 285877    | POM121L12    | POM121 membrane glycoprotein-like 12                                                              |
| 6594      | SMARCA1      | SWI/SNF related, matrix associated, actin dependent regulator of chromatin, subfamily a, member 1 |
| 163688    | CALML6       | calmodulin-like 6                                                                                 |
| 645478    | [No Symbol]  | [No Name]                                                                                         |
| 204219    | LASS3        | LAG1 homolog, ceramide synthase 3                                                                 |
| 119392    | MEIR5        | MEI5 meiotic recombination protein homolog ( <i>S. cerevisiae</i> )                               |
| 128718    | RPS11P1      | ribosomal protein S11 pseudogene 1                                                                |
| 391470    | LOC391470    | adenosylhomocysteinase pseudogene                                                                 |
| 3977      | LIFR         | leukemia inhibitory factor receptor alpha                                                         |
| 100129583 | FAM47E       | family with sequence similarity 47, member E                                                      |
| 449491    | DEFA8P       | defensin, alpha 8 pseudogene                                                                      |
| 93594     | WDR67        | WD repeat domain 67                                                                               |
| 407040    | MIR34A       | microRNA 34a                                                                                      |
| 100131370 | DDX18P6      | DEAD (Asp-Glu-Ala-Asp) box polypeptide 18 pseudogene 6                                            |
| 84727     | SPSB2        | splA/ryanodine receptor domain and SOCS box containing 2                                          |
| 5650      | KLK7         | kallikrein-related peptidase 7                                                                    |
| 80100     | [No Symbol]  | [No Name]                                                                                         |
| 8382      | NME5         | non-metastatic cells 5, protein expressed in (nucleoside-diphosphate kinase)                      |
| 100128413 | LOC100128413 | X-linked inhibitor of apoptosis pseudogene                                                        |
| 100129135 | LOC100129135 | selenocysteine insertion sequence-binding protein 2-like                                          |



|           |             |                                                                                         |
|-----------|-------------|-----------------------------------------------------------------------------------------|
| 84671     | ZNF347      | zinc finger protein 347                                                                 |
| 730184    | LOC730184   | hypothetical LOC730184                                                                  |
| 79753     | SNIP1       | Smad nuclear interacting protein 1                                                      |
| 652411    | RPSAP44     | ribosomal protein SA pseudogene 44                                                      |
| 359948    | IRF2BP2     | interferon regulatory factor 2 binding protein 2                                        |
| 1687      | DFNA5       | deafness, autosomal dominant 5                                                          |
| 9453      | GGPS1       | geranylgeranyl diphosphate synthase 1                                                   |
| 51617     | HMP19       | HMP19 protein                                                                           |
| 80146     | UXS1        | UDP-glucuronate decarboxylase 1                                                         |
| 79009     | DDX50       | DEAD (Asp-Glu-Ala-Asp) box polypeptide 50                                               |
| 253017    | TECRL       | trans-2,3-enoyl-CoA reductase-like                                                      |
| 400934    | FLJ44385    | hypothetical FLJ44385                                                                   |
| 100131073 | [No Symbol] | [No Name]                                                                               |
| 390313    | OR5BS1P     | olfactory receptor, family 5, subfamily BS, member 1 pseudogene                         |
| 8840      | WISP1       | WNT1 inducible signaling pathway protein 1                                              |
| 3833      | KIFC1       | kinesin family member C1                                                                |
| 114192    | SIGLEC20P   | sialic acid binding Ig-like lectin 20, pseudogene                                       |
| 57619     | SHROOM3     | shroom family member 3                                                                  |
| 23616     | SH3BP1      | SH3-domain binding protein 1                                                            |
| 11129     | CLSRP       | CLK4-associating serine/arginine rich protein                                           |
| 100130084 | [No Symbol] | [No Name]                                                                               |
| 5062      | PAK2        | p21 protein (Cdc42/Rac)-activated kinase 2                                              |
| 1296      | COL8A2      | collagen, type VIII, alpha 2                                                            |
| 441887    | LOC441887   | DnaJ (Hsp40) homolog, subfamily C, member 7 pseudogene                                  |
| 100131893 | RPL3P11     | ribosomal protein L3 pseudogene 11                                                      |
| 5881      | RAC3        | ras-related C3 botulinum toxin substrate 3 (rho family, small GTP binding protein Rac3) |
| 1555      | CYP2B6      | cytochrome P450, family 2, subfamily B, polypeptide 6                                   |
| 29035     | C16orf72    | chromosome 16 open reading frame 72                                                     |
| 374986    | FAM73A      | family with sequence similarity 73, member A                                            |
| 126433    | FBXO27      | F-box protein 27                                                                        |
| 22999     | RIMS1       | regulating synaptic membrane exocytosis 1                                               |
| 391073    | LOC391073   | glyceraldehyde-3-phosphate dehydrogenase pseudogene                                     |
| 3857      | KRT9        | keratin 9                                                                               |
| 130802    | DNMT3AP1    | DNA methyltransferase 3A pseudogene 1                                                   |
| 155435    | RBM33       | RNA binding motif protein 33                                                            |

|           |              |                                                                                             |
|-----------|--------------|---------------------------------------------------------------------------------------------|
| 201633    | TIGIT        | T cell immunoreceptor with Ig and ITIM domains                                              |
| 55214     | LEPREL1      | leprecan-like 1                                                                             |
| 1141      | CHRN2        | cholinergic receptor, nicotinic, beta 2 (neuronal)                                          |
| 219858    | OR8B12       | olfactory receptor, family 8, subfamily B, member 12                                        |
| 100128870 | [No Symbol]  | [No Name]                                                                                   |
| 100129814 | [No Symbol]  | [No Name]                                                                                   |
| 100129007 | FMO8P        | flavin containing monooxygenase 8 pseudogene                                                |
| 391117    | OR10J2P      | olfactory receptor, family 10, subfamily J, member 2 pseudogene                             |
| 100133007 | LOC100133007 | DENN/MADD domain containing 1C pseudogene                                                   |
| 6506      | SLC1A2       | solute carrier family 1 (glial high affinity glutamate transporter), member 2               |
| 9922      | IQSEC1       | IQ motif and Sec7 domain 1                                                                  |
| 100133252 | LOC100133252 | zinc finger protein 131 pseudogene                                                          |
| 100129271 | C1orf68      | chromosome 1 open reading frame 68                                                          |
| 730201    | [No Symbol]  | [No Name]                                                                                   |
| 7545      | ZIC1         | Zic family member 1                                                                         |
| 2151      | F2RL2        | coagulation factor II (thrombin) receptor-like 2                                            |
| 284417    | TMEM150B     | transmembrane protein 150B                                                                  |
| 23262     | PIPK2        | diphosphoinositol pentakisphosphate kinase 2                                                |
| 83606     | C22orf13     | chromosome 22 open reading frame 13                                                         |
| 3680      | ITGA9        | integrin, alpha 9                                                                           |
| 641765    | [No Symbol]  | [No Name]                                                                                   |
| 84498     | FAM120B      | family with sequence similarity 120B                                                        |
| 118813    | ZFYVE27      | zinc finger, FYVE domain containing 27                                                      |
| 390327    | OR6C70       | olfactory receptor, family 6, subfamily C, member 70                                        |
| 100130776 | LOC100130776 | hypothetical LOC100130776                                                                   |
| 339500    | ZNF678       | zinc finger protein 678                                                                     |
| 389376    | SFTA2        | surfactant associated 2                                                                     |
| 5077      | PAX3         | paired box 3                                                                                |
| 3788      | KCN2         | potassium voltage-gated channel, delayed-rectifier, subfamily S, member 2                   |
| 7531      | YWHAE        | tyrosine 3-monooxygenase/tryptophan 5-monooxygenase activation protein, epsilon polypeptide |
| 80139     | ZNF703       | zinc finger protein 703                                                                     |
| 4155      | MBP          | myelin basic protein                                                                        |
| 100129692 | EIF4BP9      | eukaryotic translation initiation factor 4B pseudogene 9                                    |
| 23746     | AIPL1        | aryl hydrocarbon receptor interacting protein-like 1                                        |
| 54569     | UGT2B27P     | UDP glucuronosyltransferase 2 family, polypeptide B27 pseudogene                            |

|           |              |                                                                                            |
|-----------|--------------|--------------------------------------------------------------------------------------------|
| 9400      | RECQL5       | RecQ protein-like 5                                                                        |
| 642864    | SRG7         | spermatogenesis-related protein 7                                                          |
| 2732      | GLDCP1       | glycine dehydrogenase (decarboxylase) pseudogene 1                                         |
| 401638    | RPSAP10      | ribosomal protein SA pseudogene 10                                                         |
| 100128993 | LOC100128993 | similar to hCG2036572                                                                      |
| 100130968 | RPL7L1P4     | ribosomal protein L7-like 1 pseudogene 4                                                   |
| 7115      | TMSB4XP1     | thymosin beta 4, X-linked pseudogene 1                                                     |
| 29951     | PDZRN4       | PDZ domain containing ring finger 4                                                        |
| 79300     | OR51P1P      | olfactory receptor, family 51, subfamily P, member 1 pseudogene                            |
| 347732    | CATSPER3     | cation channel, sperm associated 3                                                         |
| 100129053 | LOC100129053 | lysine (K)-specific demethylase 4D-like pseudogene                                         |
| 399947    | C11orf87     | chromosome 11 open reading frame 87                                                        |
| 22834     | ZNF652       | zinc finger protein 652                                                                    |
| 100129773 | [No Symbol]  | [No Name]                                                                                  |
| 730094    | C16orf52     | chromosome 16 open reading frame 52                                                        |
| 8621      | CDK13        | cyclin-dependent kinase 13                                                                 |
| 9750      | FAM65B       | family with sequence similarity 65, member B                                               |
| 133688    | UGT3A1       | UDP glycosyltransferase 3 family, polypeptide A1                                           |
| 100132795 | RPL12P32     | ribosomal protein L12 pseudogene 32                                                        |
| 4855      | NOTCH4       | notch 4                                                                                    |
| 114876    | OSBPL1A      | oxysterol binding protein-like 1A                                                          |
| 22885     | ABLIM3       | actin binding LIM protein family, member 3                                                 |
| 64432     | MRPS25       | mitochondrial ribosomal protein S25                                                        |
| 4838      | NODAL        | nodal homolog (mouse)                                                                      |
| 79550     | OR4C4P       | olfactory receptor, family 4, subfamily C, member 4 pseudogene                             |
| 100128902 | PRDX3P3      | peroxiredoxin 3 pseudogene 3                                                               |
| 9121      | SLC16A5      | solute carrier family 16, member 5 (monocarboxylic acid transporter 6)                     |
| 286544    | MXRA5P1      | matrix-remodelling associated 5 pseudogene 1                                               |
| 64005     | MYO1G        | myosin IG                                                                                  |
| 337976    | KRTAP20-2    | keratin associated protein 20-2                                                            |
| 85378     | TUBGCP6      | tubulin, gamma complex associated protein 6                                                |
| 84938     | ATG4C        | ATG4 autophagy related 4 homolog C ( <i>S. cerevisiae</i> )                                |
| 441899    | LOC441899    | vacuolar protein sorting 25 homolog ( <i>S. cerevisiae</i> ) pseudogene                    |
| 5573      | PRKAR1A      | protein kinase, cAMP-dependent, regulatory, type I, alpha (tissue specific extinguisher 1) |
| 26493     | OR8B8        | olfactory receptor, family 8, subfamily B, member 8                                        |

|           |              |                                                                                      |
|-----------|--------------|--------------------------------------------------------------------------------------|
| 100129348 | LOC100129348 | cell division cycle associated 4 pseudogene                                          |
| 9411      | ARHGAP29     | Rho GTPase activating protein 29                                                     |
| 197358    | NLRC3        | NLR family, CARD domain containing 3                                                 |
| 22872     | SEC31A       | SEC31 homolog A ( <i>S. cerevisiae</i> )                                             |
| 283189    | OR9G4        | olfactory receptor, family 9, subfamily G, member 4                                  |
| 55268     | ECHDC2       | enoyl CoA hydratase domain containing 2                                              |
| 22926     | ATF6         | activating transcription factor 6                                                    |
| 55626     | AMBRA1       | autophagy/beclin-1 regulator 1                                                       |
| 80316     | PPP1R2P9     | protein phosphatase 1, regulatory (inhibitor) subunit 2 pseudogene 9                 |
| 51742     | ARID4B       | AT rich interactive domain 4B (RBP1-like)                                            |
| 8440      | NCK2         | NCK adaptor protein 2                                                                |
| 3065      | HDAC1        | histone deacetylase 1                                                                |
| 3981      | LIG4         | ligase IV, DNA, ATP-dependent                                                        |
| 729662    | RPL22P3      | ribosomal protein L22 pseudogene 3                                                   |
| 5364      | PLXNB1       | plexin B1                                                                            |
| 9064      | MAP3K6       | mitogen-activated protein kinase kinase kinase 6                                     |
| 643941    | PHKG1P1      | phosphorylase kinase, gamma 1 pseudogene 1                                           |
| 80853     | JHDM1D       | jumonji C domain containing histone demethylase 1 homolog D ( <i>S. cerevisiae</i> ) |
| 79940     | C6orf155     | chromosome 6 open reading frame 155                                                  |
| 150696    | PROM2        | prominin 2                                                                           |
| 8106      | PABPN1       | poly(A) binding protein, nuclear 1                                                   |
| 25973     | PARS2        | prolyl-tRNA synthetase 2, mitochondrial (putative)                                   |
| 57666     | FBRSL1       | fibrosin-like 1                                                                      |
| 58538     | MPP4         | membrane protein, palmitoylated 4 (MAGUK p55 subfamily member 4)                     |
| 55716     | LMBR1L       | limb region 1 homolog (mouse)-like                                                   |
| 84260     | TCHP         | trichoplein, keratin filament binding                                                |
| 2890      | GRIA1        | glutamate receptor, ionotropic, AMPA 1                                               |
| 100128153 | [No Symbol]  | [No Name]                                                                            |
| 10159     | ATP6AP2      | ATPase, H <sup>+</sup> transporting, lysosomal accessory protein 2                   |
| 84447     | SYVN1        | synovial apoptosis inhibitor 1, synoviolin                                           |
| 84765     | ZNF577       | zinc finger protein 577                                                              |
| 79168     | LILRA6       | leukocyte immunoglobulin-like receptor, subfamily A (with TM domain), member 6       |
| 494329    | MIR380       | microRNA 380                                                                         |
| 729911    | LOC729911    | hypothetical LOC729911                                                               |
| 100128554 | LOC100128554 | hypothetical LOC100128554                                                            |

|           |              |                                                                                     |
|-----------|--------------|-------------------------------------------------------------------------------------|
| 124872    | B4GALNT2     | beta-1,4-N-acetyl-galactosaminyl transferase 2                                      |
| 84168     | ANTXR1       | anthrax toxin receptor 1                                                            |
| 219436    | OR5D14       | olfactory receptor, family 5, subfamily D, member 14                                |
| 139425    | DCAF8L1      | DDB1 and CUL4 associated factor 8-like 1                                            |
| 9789      | SPCS2        | signal peptidase complex subunit 2 homolog ( <i>S. cerevisiae</i> )                 |
| 23557     | SNAPIN       | SNAP-associated protein                                                             |
| 100133296 | [No Symbol]  | [No Name]                                                                           |
| 3324      | HSP90AA2     | heat shock protein 90kDa alpha (cytosolic), class A member 2                        |
| 646187    | [No Symbol]  | [No Name]                                                                           |
| 79872     | CBLL1        | Cas-Br-M (murine) ecotropic retroviral transforming sequence-like 1                 |
| 56994     | CHPT1        | choline phosphotransferase 1                                                        |
| 145270    | PRIMA1       | proline rich membrane anchor 1                                                      |
| 642819    | ZNF487P      | zinc finger protein 487, pseudogene                                                 |
| 10237     | SLC35B1      | solute carrier family 35, member B1                                                 |
| 100129856 | RPL37AP5     | ribosomal protein L37a pseudogene 5                                                 |
| 23099     | ZBTB43       | zinc finger and BTB domain containing 43                                            |
| 100130142 | [No Symbol]  | [No Name]                                                                           |
| 2261      | FGFR3        | fibroblast growth factor receptor 3                                                 |
| 1525      | CXADR        | coxsackie virus and adenovirus receptor                                             |
| 92482     | BBIP1        | BBSome interacting protein 1                                                        |
| 2128      | EVX1         | even-skipped homeobox 1                                                             |
| 55366     | LGR4         | leucine-rich repeat containing G protein-coupled receptor 4                         |
| 28514     | DLL1         | delta-like 1 ( <i>Drosophila</i> )                                                  |
| 26523     | EIF2C1       | eukaryotic translation initiation factor 2C, 1                                      |
| 9245      | GCNT3        | glucosaminyl (N-acetyl) transferase 3, mucin type                                   |
| 5265      | SERPINA1     | serpin peptidase inhibitor, clade A (alpha-1 antiproteinase, antitrypsin), member 1 |
| 375056    | MIA3         | melanoma inhibitory activity family, member 3                                       |
| 337966    | KRTAP6-1     | keratin associated protein 6-1                                                      |
| 389558    | FAM180A      | family with sequence similarity 180, member A                                       |
| 57492     | ARID1B       | AT rich interactive domain 1B (SWI1-like)                                           |
| 440072    | NCRNA00167   | non-protein coding RNA 167                                                          |
| 23171     | GPD1L        | glycerol-3-phosphate dehydrogenase 1-like                                           |
| 6955      | TRA@         | T cell receptor alpha locus                                                         |
| 100129955 | LOC100129955 | RNA polymerase I-specific transcription initiation factor RRN3-like                 |
| 84418     | C5orf32      | chromosome 5 open reading frame 32                                                  |

|           |              |                                                                                     |
|-----------|--------------|-------------------------------------------------------------------------------------|
| 613227    | HIGD1C       | HIG1 hypoxia inducible domain family, member 1C                                     |
| 5688      | PSMA7        | proteasome (prosome, macropain) subunit, alpha type, 7                              |
| 9232      | PTTG1        | pituitary tumor-transforming 1                                                      |
| 1061      | CENPC1P1     | centromere protein C 1 pseudogene 1                                                 |
| 10644     | IGF2BP2      | insulin-like growth factor 2 mRNA binding protein 2                                 |
| 100129456 | LOC100129456 | heat shock protein 90kDa alpha (cytosolic), class B member 1 pseudogene             |
| 6513      | SLC2A1       | solute carrier family 2 (facilitated glucose transporter), member 1                 |
| 222584    | FAM83B       | family with sequence similarity 83, member B                                        |
| 100128613 | [No Symbol]  | [No Name]                                                                           |
| 57634     | EP400        | E1A binding protein p400                                                            |
| 100133303 | [No Symbol]  | [No Name]                                                                           |
| 54541     | DDIT4        | DNA-damage-inducible transcript 4                                                   |
| 728147    | LOC728147    | hypothetical protein LOC728147                                                      |
| 146057    | TTBK2        | tau tubulin kinase 2                                                                |
| 1374      | CPT1A        | carnitine palmitoyltransferase 1A (liver)                                           |
| 114827    | FHAD1        | forkhead-associated (FHA) phosphopeptide binding domain 1                           |
| 646625    | PRHOXNB      | parahox cluster neighbor                                                            |
| 91        | ACVR1B       | activin A receptor, type IB                                                         |
| 147929    | ZNF565       | zinc finger protein 565                                                             |
| 133083    | LOC133083    | peptidase (mitochondrial processing) alpha pseudogene                               |
| 649095    | [No Symbol]  | [No Name]                                                                           |
| 55805     | LRP2BP       | LRP2 binding protein                                                                |
| 100127978 | LOC100127978 | starch binding domain 1 pseudogene                                                  |
| 399978    | [No Symbol]  | [No Name]                                                                           |
| 83597     | RTP3         | receptor (chemosensory) transporter protein 3                                       |
| 5104      | SERPINA5     | serpin peptidase inhibitor, clade A (alpha-1 antiproteinase, antitrypsin), member 5 |
| 119369    | NUDT9P1      | nudix (nucleoside diphosphate linked moiety X)-type motif 9 pseudogene 1            |
| 4091      | SMAD6        | SMAD family member 6                                                                |
| 346562    | GNAT3        | guanine nucleotide binding protein, alpha transducing 3                             |
| 10318     | TNIP1        | TNFAIP3 interacting protein 1                                                       |
| 100130031 | [No Symbol]  | [No Name]                                                                           |
| 51465     | UBE2J1       | ubiquitin-conjugating enzyme E2, J1, U                                              |
| 5489      | PPIAP7       | peptidylprolyl isomerase A (cyclophilin A) pseudogene 7                             |
| 142913    | CFL1P1       | cofilin 1 (non-muscle) pseudogene 1                                                 |
| 245930    | DEFB116      | defensin, beta 116                                                                  |

|           |             |                                                                                         |
|-----------|-------------|-----------------------------------------------------------------------------------------|
| 5212      | VIT         | vitrin                                                                                  |
| 8531      | CSDA        | cold shock domain protein A                                                             |
| 4147      | MATN2       | matrilin 2                                                                              |
| 344892    | RTP2        | receptor (chemosensory) transporter protein 2                                           |
| 140565    | [No Symbol] | [No Name]                                                                               |
| 100132779 | [No Symbol] | [No Name]                                                                               |
| 127795    | C1orf87     | chromosome 1 open reading frame 87                                                      |
| 23678     | SGK3        | serum/glucocorticoid regulated kinase family, member 3                                  |
| 120796    | OR56A1      | olfactory receptor, family 56, subfamily A, member 1                                    |
| 730173    | [No Symbol] | [No Name]                                                                               |
| 100127949 | RPL15P16    | ribosomal protein L15 pseudogene 16                                                     |
| 326337    | SSXP4       | SSX family pseudogene 4                                                                 |
| 117248    | GALNTL2     | UDP-N-acetyl-alpha-D-galactosamine:polypeptide N-acetylgalactosaminyltransferase-like 2 |
| 3280      | HES1        | hairy and enhancer of split 1, (Drosophila)                                             |
| 80011     | FAM192A     | family with sequence similarity 192, member A                                           |
| 5701      | PSMC2       | proteasome (prosome, macropain) 26S subunit, ATPase, 2                                  |
| 10324     | KBTBD10     | kelch repeat and BTB (POZ) domain containing 10                                         |
| 22824     | HSPA4L      | heat shock 70kDa protein 4-like                                                         |
| 219473    | OR8K3       | olfactory receptor, family 8, subfamily K, member 3                                     |
| 11148     | HHLA2       | HERV-H LTR-associating 2                                                                |
| 6015      | RING1       | ring finger protein 1                                                                   |
| 9690      | UBE3C       | ubiquitin protein ligase E3C                                                            |
| 4990      | SIX6        | SIX homeobox 6                                                                          |
| 260340    | TFAMP2      | transcription factor A, mitochondrial pseudogene 2                                      |
| 613209    | DEFB135     | defensin, beta 135                                                                      |
| 100132992 | HMGN1P30    | high mobility group nucleosome binding domain 1 pseudogene 30                           |
| 64710     | NUCKS1      | nuclear casein kinase and cyclin-dependent kinase substrate 1                           |
| 245802    | MS4A6E      | membrane-spanning 4-domains, subfamily A, member 6E                                     |
| 81839     | VANGL1      | vang-like 1 (van gogh, Drosophila)                                                      |
| 147699    | PPM1N       | protein phosphatase, Mg <sup>2+</sup> /Mn <sup>2+</sup> dependent, 1N (putative)        |
| 63948     | DMRTB1      | DMRT-like family B with proline-rich C-terminal, 1                                      |
| 64968     | MRPS6       | mitochondrial ribosomal protein S6                                                      |
| 646535    | LOC646535   | 60S ribosomal protein L7a-like                                                          |
| 2653      | GCSH        | glycine cleavage system protein H (aminomethyl carrier)                                 |
| 79958     | DENND1C     | DENN/MADD domain containing 1C                                                          |

|           |              |                                                                                  |
|-----------|--------------|----------------------------------------------------------------------------------|
| 100128062 | SLC2A3P1     | solute carrier family 2 (facilitated glucose transporter), member 3 pseudogene 1 |
| 83939     | EIF2A        | eukaryotic translation initiation factor 2A, 65kDa                               |
| 728294    | D2HGDH       | D-2-hydroxyglutarate dehydrogenase                                               |
| 79508     | OR5M7P       | olfactory receptor, family 5, subfamily M, member 7 pseudogene                   |
| 57821     | C1orf114     | chromosome 1 open reading frame 114                                              |
| 810       | CALML3       | calmodulin-like 3                                                                |
| 5458      | POU4F2       | POU class 4 homeobox 2                                                           |
| 6720      | SREBF1       | sterol regulatory element binding transcription factor 1                         |
| 4712      | NDUFB6       | NADH dehydrogenase (ubiquinone) 1 beta subcomplex, 6, 17kDa                      |
| 140803    | TRPM6        | transient receptor potential cation channel, subfamily M, member 6               |
| 51011     | FAHD2A       | fumarylacetoacetate hydrolase domain containing 2A                               |
| 643015    | LOC643015    | nucleolar protein 11 pseudogene                                                  |
| 208       | AKT2         | v-akt murine thymoma viral oncogene homolog 2                                    |
| 2040      | STOM         | stomatin                                                                         |
| 23043     | TNIK         | TRAF2 and NCK interacting kinase                                                 |
| 100128997 | LOC100128997 | hypothetical LOC100128997                                                        |
| 401825    | LOC401825    | MKI67 (FHA domain) interacting nucleolar phosphoprotein pseudogene               |
| 440311    | LOC440311    | glioma tumor suppressor candidate region gene 2 pseudogene                       |
| 7371      | UCK2         | uridine-cytidine kinase 2                                                        |
| 199699    | DAND5        | DAN domain family, member 5                                                      |
| 644584    | LOC644584    | Ewing sarcoma breakpoint region 1 pseudogene                                     |
| 55573     | CDV3         | CDV3 homolog (mouse)                                                             |
| 730144    | LOC730144    | eukaryotic translation initiation factor 1 pseudogene                            |
| 10466     | COG5         | component of oligomeric golgi complex 5                                          |
| 55215     | FANCI        | Fanconi anemia, complementation group I                                          |
| 283902    | HTA          | hypothetical LOC283902                                                           |
| 2243      | FGA          | fibrinogen alpha chain                                                           |
| 54873     | PALMD        | palmdelphin                                                                      |
| 284161    | GDPD1        | glycerophosphodiester phosphodiesterase domain containing 1                      |
| 100126477 | TRNAL-AAG    | transfer RNA leucine (anticodon AAG)                                             |
| 51663     | ZFR          | zinc finger RNA binding protein                                                  |
| 285489    | DOK7         | docking protein 7                                                                |
| 81295     | OR51A10P     | olfactory receptor, family 51, subfamily A, member 10 pseudogene                 |
| 100132424 | [No Symbol]  | [No Name]                                                                        |
| 84769     | MPV17L2      | MPV17 mitochondrial membrane protein-like 2                                      |



|           |              |                                                                                  |
|-----------|--------------|----------------------------------------------------------------------------------|
| 79676     | OGFOD2       | 2-oxoglutarate and iron-dependent oxygenase domain containing 2                  |
| 22848     | AAK1         | AP2 associated kinase 1                                                          |
| 5049      | PAFAH1B2     | platelet-activating factor acetylhydrolase 1b, catalytic subunit 2 (30kDa)       |
| 100131036 | HMGB3P28     | high mobility group box 3 pseudogene 28                                          |
| 57052     | [No Symbol]  | [No Name]                                                                        |
| 79679     | VTCN1        | V-set domain containing T cell activation inhibitor 1                            |
| 26005     | C2CD3        | C2 calcium-dependent domain containing 3                                         |
| 147429    | CHST9-AS1    | CHST9 antisense RNA 1 (non-protein coding)                                       |
| 285971    | ZNF775       | zinc finger protein 775                                                          |
| 646962    | HRCT1        | histidine rich carboxyl terminus 1                                               |
| 10456     | HAX1         | HCLS1 associated protein X-1                                                     |
| 100129816 | [No Symbol]  | [No Name]                                                                        |
| 50863     | NTM          | neurotrimin                                                                      |
| 10389     | SCML2        | sex comb on midleg-like 2 (Drosophila)                                           |
| 58528     | RRAGD        | Ras-related GTP binding D                                                        |
| 91949     | COG7         | component of oligomeric golgi complex 7                                          |
| 5519      | PPP2R1B      | protein phosphatase 2, regulatory subunit A, beta                                |
| 23205     | ACSBG1       | acyl-CoA synthetase bubblegum family member 1                                    |
| 51087     | YBX2         | Y box binding protein 2                                                          |
| 1720      | LOC1720      | dihydrofolate reductase pseudogene                                               |
| 1758      | DMP1         | dentin matrix acidic phosphoprotein 1                                            |
| 283417    | DPY19L2      | dpy-19-like 2 (C. elegans)                                                       |
| 326614    | PEBP1P1      | phosphatidylethanolamine binding protein 1 pseudogene 1                          |
| 23732     | C9orf4       | chromosome 9 open reading frame 4                                                |
| 130576    | LYPD6B       | LY6/PLAUR domain containing 6B                                                   |
| 645973    | ATP5F1P2     | ATP synthase, H+ transporting, mitochondrial Fo complex, subunit B1 pseudogene 2 |
| 51802     | ACCN5        | amiloride-sensitive cation channel 5, intestinal                                 |
| 806       | CALM2P2      | calmodulin 2 pseudogene 2                                                        |
| 51205     | ACP6         | acid phosphatase 6, lysophosphatidic                                             |
| 100128335 | LOC100128335 | WD repeat domain 12 pseudogene                                                   |
| 9629      | CLCA3P       | chloride channel accessory 3, pseudogene                                         |
| 3008      | HIST1H1E     | histone cluster 1, H1e                                                           |
| 387758    | FIBIN        | fin bud initiation factor homolog (zebrafish)                                    |
| 150379    | PNPLA5       | patatin-like phospholipase domain containing 5                                   |
| 253820    | [No Symbol]  | [No Name]                                                                        |

|           |              |                                                                     |
|-----------|--------------|---------------------------------------------------------------------|
| 339453    | C1orf70      | chromosome 1 open reading frame 70                                  |
| 79974     | C7orf58      | chromosome 7 open reading frame 58                                  |
| 387748    | OR56B1       | olfactory receptor, family 56, subfamily B, member 1                |
| 114800    | CCDC85A      | coiled-coil domain containing 85A                                   |
| 730495    | LOC730495    | hypothetical protein LOC730495                                      |
| 155185    | AMZ1         | archaelysin family metallopeptidase 1                               |
| 388523    | ZNF728       | zinc finger protein 728                                             |
| 8214      | DGCR6        | DiGeorge syndrome critical region gene 6                            |
| 391589    | KRT18P34     | keratin 18 pseudogene 34                                            |
| 391462    | RPSAP24      | ribosomal protein SA pseudogene 24                                  |
| 55742     | PARVA        | parvin, alpha                                                       |
| 1266      | CNN3         | calponin 3, acidic                                                  |
| 51277     | DNAJC27      | DnaJ (Hsp40) homolog, subfamily C, member 27                        |
| 3791      | KDR          | kinase insert domain receptor (a type III receptor tyrosine kinase) |
| 284723    | SLC25A34     | solute carrier family 25, member 34                                 |
| 715       | C1R          | complement component 1, r subcomponent                              |
| 145645    | C15orf43     | chromosome 15 open reading frame 43                                 |
| 54490     | UGT2B28      | UDP glucuronosyltransferase 2 family, polypeptide B28               |
| 79971     | WLS          | wntless homolog (Drosophila)                                        |
| 729589    | [No Symbol]  | [No Name]                                                           |
| 283450    | C12orf51     | chromosome 12 open reading frame 51                                 |
| 344595    | LOC344595    | hypothetical LOC344595                                              |
| 390294    | LOC390294    | heterogeneous nuclear ribonucleoprotein A/B pseudogene              |
| 286097    | EFHA2        | EF-hand domain family, member A2                                    |
| 164312    | LRRN4        | leucine rich repeat neuronal 4                                      |
| 10476     | ATP5H        | ATP synthase, H+ transporting, mitochondrial Fo complex, subunit d  |
| 100129461 | LOC100129461 | hypothetical LOC100129461                                           |
| 7652      | ZNF99        | zinc finger protein 99                                              |
| 7697      | ZNF138       | zinc finger protein 138                                             |
| 220974    | OR6D1P       | olfactory receptor, family 6, subfamily D, member 1 pseudogene      |
| 402422    | LOC402422    | tubulin, beta 4 pseudogene                                          |
| 166070    | DDX50P2      | DEAD/H (Asp-Glu-Ala-Asp/His) box polypeptide 50 pseudogene 2        |
| 777       | CACNA1E      | calcium channel, voltage-dependent, R type, alpha 1E subunit        |
| 5453      | POU3F1       | POU class 3 homeobox 1                                              |
| 7307      | U2AF1        | U2 small nuclear RNA auxiliary factor 1                             |

|           |              |                                                                                              |
|-----------|--------------|----------------------------------------------------------------------------------------------|
| 84466     | MEGF10       | multiple EGF-like-domains 10                                                                 |
| 9238      | TBRG4        | transforming growth factor beta regulator 4                                                  |
| 5335      | PLCG1        | phospholipase C, gamma 1                                                                     |
| 26980     | PABPC1P1     | poly(A) binding protein, cytoplasmic 1 pseudogene 1                                          |
| 100132440 | [No Symbol]  | [No Name]                                                                                    |
| 78990     | OTUB2        | OTU domain, ubiquitin aldehyde binding 2                                                     |
| 9941      | EXOG         | endo/exonuclease (5'-3'), endonuclease G-like                                                |
| 285643    | KIF4B        | kinesin family member 4B                                                                     |
| 57282     | SLC4A10      | solute carrier family 4, sodium bicarbonate transporter, member 10                           |
| 246184    | CDC26        | cell division cycle 26 homolog (S. cerevisiae)                                               |
| 55195     | C14orf105    | chromosome 14 open reading frame 105                                                         |
| 5783      | PTPN13       | protein tyrosine phosphatase, non-receptor type 13 (APO-1/CD95 (Fas)-associated phosphatase) |
| 2185      | PTK2B        | PTK2B protein tyrosine kinase 2 beta                                                         |
| 100131418 | RPS27P22     | ribosomal protein S27 pseudogene 22                                                          |
| 90693     | CCDC126      | coiled-coil domain containing 126                                                            |
| 5566      | PRKACA       | protein kinase, cAMP-dependent, catalytic, alpha                                             |
| 100132137 | [No Symbol]  | [No Name]                                                                                    |
| 100131034 | LOC100131034 | hypothetical protein LOC100131034                                                            |
| 284612    | SYPL2        | synaptophysin-like 2                                                                         |
| 389493    | LOC389493    | hypothetical protein LOC389493                                                               |
| 4744      | NEFH         | neurofilament, heavy polypeptide                                                             |
| 653588    | LOC653588    | Sjogren syndrome antigen B (autoantigen La) pseudogene                                       |
| 1454      | CSNK1E       | casein kinase 1, epsilon                                                                     |
| 100130618 | LOC100130618 | tetratricopeptide repeat domain 14 pseudogene                                                |
| 645474    | S100A11P3    | S100 calcium binding protein A11 pseudogene 3                                                |
| 10345     | TRDN         | triadin                                                                                      |
| 220885    | RPSAP15      | ribosomal protein SA pseudogene 15                                                           |
| 100128641 | [No Symbol]  | [No Name]                                                                                    |
| 26232     | FBXO2        | F-box protein 2                                                                              |
| 673       | BRAF         | v-raf murine sarcoma viral oncogene homolog B1                                               |
| 228       | ALDOAP2      | aldolase A, fructose-bisphosphate pseudogene 2                                               |
| 340260    | UNCX         | UNC homeobox                                                                                 |
| 6401      | SELE         | selectin E                                                                                   |
| 26122     | EPC2         | enhancer of polycomb homolog 2 (Drosophila)                                                  |
| 728716    | LOC728716    | hypothetical LOC728716                                                                       |

|           |              |                                                                           |
|-----------|--------------|---------------------------------------------------------------------------|
| 57617     | VPS18        | vacuolar protein sorting 18 homolog ( <i>S. cerevisiae</i> )              |
| 100131056 | [No Symbol]  | [No Name]                                                                 |
| 85403     | EAF1         | ELL associated factor 1                                                   |
| 100131772 | [No Symbol]  | [No Name]                                                                 |
| 730124    | [No Symbol]  | [No Name]                                                                 |
| 10236     | HNRNPR       | heterogeneous nuclear ribonucleoprotein R                                 |
| 124975    | GGT6         | gamma-glutamyltransferase 6                                               |
| 399717    | FLJ45983     | hypothetical LOC399717                                                    |
| 26088     | GGA1         | golgi-associated, gamma adaptin ear containing, ARF binding protein 1     |
| 219875    | OR4D5        | olfactory receptor, family 4, subfamily D, member 5                       |
| 64924     | SLC30A5      | solute carrier family 30 (zinc transporter), member 5                     |
| 85026     | C9orf37      | chromosome 9 open reading frame 37                                        |
| 100131990 | LOC100131990 | similar to hCG1660378                                                     |
| 2257      | FGF12        | fibroblast growth factor 12                                               |
| 25924     | MYRIP        | myosin VIIA and Rab interacting protein                                   |
| 2100      | ESR2         | estrogen receptor 2 (ER beta)                                             |
| 391467    | IMPDH1P7     | IMP (inosine monophosphate) dehydrogenase 1 pseudogene 7                  |
| 93986     | FOXP2        | forkhead box P2                                                           |
| 388630    | LOC388630    | UPF0632 protein A                                                         |
| 3757      | KCNH2        | potassium voltage-gated channel, subfamily H (eag-related), member 2      |
| 100127986 | LOC100127986 | cation channel, sperm associated 2 pseudogene                             |
| 286187    | LRRRC67      | leucine rich repeat containing 67                                         |
| 10743     | RAI1         | retinoic acid induced 1                                                   |
| 200726    | LOC200726    | hCG1657980                                                                |
| 100131157 | [No Symbol]  | [No Name]                                                                 |
| 391012    | LOC391012    | dynein, cytoplasmic, light polypeptide 1 pseudogene                       |
| 79310     | OR5H2        | olfactory receptor, family 5, subfamily H, member 2                       |
| 222236    | NAPEPLD      | N-acyl phosphatidylethanolamine phospholipase D                           |
| 8801      | SUCLG2       | succinate-CoA ligase, GDP-forming, beta subunit                           |
| 5520      | PPP2R2A      | protein phosphatase 2, regulatory subunit B, alpha                        |
| 83943     | IMMP2L       | IMP2 inner mitochondrial membrane peptidase-like ( <i>S. cerevisiae</i> ) |
| 272       | AMPD3        | adenosine monophosphate deaminase 3                                       |
| 100128576 | [No Symbol]  | [No Name]                                                                 |
| 90019     | SYT8         | synaptotagmin VIII                                                        |
| 100130431 | [No Symbol]  | [No Name]                                                                 |

|           |              |                                                                                                                                                          |
|-----------|--------------|----------------------------------------------------------------------------------------------------------------------------------------------------------|
| 641516    | KC6          | keratoconus gene 6                                                                                                                                       |
| 80092     | [No Symbol]  | [No Name]                                                                                                                                                |
| 100132805 | [No Symbol]  | [No Name]                                                                                                                                                |
| 644753    | [No Symbol]  | [No Name]                                                                                                                                                |
| 100130578 | [No Symbol]  | [No Name]                                                                                                                                                |
| 26986     | PABPC1       | poly(A) binding protein, cytoplasmic 1                                                                                                                   |
| 144124    | OR10A5       | olfactory receptor, family 10, subfamily A, member 5                                                                                                     |
| 400986    | LOC400986    | ankyrin repeat domain-containing protein 36C                                                                                                             |
| 100132242 | LOC100132242 | exosome component 8 pseudogene                                                                                                                           |
| 391587    | LOC391587    | peptidyl-prolyl cis-trans isomerase A-like                                                                                                               |
| 4888      | NPY6R        | neuropeptide Y receptor Y6 (pseudogene)                                                                                                                  |
| 6519      | SLC3A1       | solute carrier family 3 (cystine, dibasic and neutral amino acid transporters, activator of cystine, dibasic and neutral amino acid transport), member 1 |
| 730034    | [No Symbol]  | [No Name]                                                                                                                                                |
| 9980      | DOPEY2       | dopey family member 2                                                                                                                                    |
| 23654     | PLXNB2       | plexin B2                                                                                                                                                |
| 55729     | ATF7IP       | activating transcription factor 7 interacting protein                                                                                                    |
| 123207    | C15orf40     | chromosome 15 open reading frame 40                                                                                                                      |
| 442664    | [No Symbol]  | [No Name]                                                                                                                                                |
| 200014    | CC2D1B       | coiled-coil and C2 domain containing 1B                                                                                                                  |
| 8686      | KRT41P       | keratin 41 pseudogene                                                                                                                                    |
| 23576     | DDAH1        | dimethylarginine dimethylaminohydrolase 1                                                                                                                |
| 152579    | SCFD2        | sec1 family domain containing 2                                                                                                                          |
| 221264    | AKD1         | adenylate kinase domain containing 1                                                                                                                     |
| 100132121 | ETF1P3       | eukaryotic translation termination factor 1 pseudogene 3                                                                                                 |
| 326593    | MORF4L1P3    | mortality factor 4 like 1 pseudogene 3                                                                                                                   |
| 221458    | KIF6         | kinesin family member 6                                                                                                                                  |
| 100126493 | TRNAP-AGG    | transfer RNA proline (anticodon AGG)                                                                                                                     |
| 79036     | C19orf50     | chromosome 19 open reading frame 50                                                                                                                      |
| 57626     | KLHL1        | kelch-like 1 (Drosophila)                                                                                                                                |
| 84343     | HPS3         | Hermansky-Pudlak syndrome 3                                                                                                                              |
| 100125393 | LOC100125393 | TIMELESS interacting protein pseudogene                                                                                                                  |
| 987       | LRBA         | LPS-responsive vesicle trafficking, beach and anchor containing                                                                                          |
| 654463    | FER1L6       | fer-1-like 6 (C. elegans)                                                                                                                                |
| 163720    | CYP4Z2P      | cytochrome P450, family 4, subfamily Z, polypeptide 2 pseudogene                                                                                         |
| 83697     | SLC4A9       | solute carrier family 4, sodium bicarbonate cotransporter, member 9                                                                                      |

|           |              |                                                               |
|-----------|--------------|---------------------------------------------------------------|
| 100128955 | [No Symbol]  | [No Name]                                                     |
| 80835     | TAS1R1       | taste receptor, type 1, member 1                              |
| 100130462 | HNF4GP1      | hepatocyte nuclear factor 4, gamma pseudogene 1               |
| 56942     | C16orf61     | chromosome 16 open reading frame 61                           |
| 151126    | ZNF385B      | zinc finger protein 385B                                      |
| 1299      | COL9A3       | collagen, type IX, alpha 3                                    |
| 140545    | RNF32        | ring finger protein 32                                        |
| 8739      | HRK          | harakiri, BCL2 interacting protein (contains only BH3 domain) |
| 140832    | WFDC10A      | WAP four-disulfide core domain 10A                            |
| 167410    | LIX1         | Lix1 homolog (chicken)                                        |
| 100131774 | LOC100131774 | hypothetical LOC100131774                                     |
| 100126509 | TRNAQ-UUG    | transfer RNA glutamine (anticodon UUG)                        |
| 100128570 | [No Symbol]  | [No Name]                                                     |
| 7871      | SLMAP        | sarcolemma associated protein                                 |
| 1767      | DNAH5        | dynein, axonemal, heavy chain 5                               |
| 100131089 | LOC100131089 | hypothetical LOC100131089                                     |
| 3859      | KRT12        | keratin 12                                                    |
| 56204     | KIAA1370     | KIAA1370                                                      |
| 1469      | CST1         | cystatin SN                                                   |
| 140885    | SIRPA        | signal-regulatory protein alpha                               |
| 23620     | NTSR2        | neurotensin receptor 2                                        |
| 54798     | DCHS2        | dachsous 2 (Drosophila)                                       |
| 1805      | DPT          | dermatopontin                                                 |
| 4783      | NFIL3        | nuclear factor, interleukin 3 regulated                       |
| 646808    | LOC646808    | L antigen family member 3-like                                |
| 219970    | GLYATL2      | glycine-N-acyltransferase-like 2                              |
| 442086    | RPL10P7      | ribosomal protein L10 pseudogene 7                            |
| 339879    | LOC339879    | asparagine-linked glycosylation 1 homolog pseudogene          |
| 677781    | SCARNA16     | small Cajal body-specific RNA 16                              |
| 347097    | LOC347097    | dermatan sulfate epimerase pseudogene                         |
| 124245    | ZC3H18       | zinc finger CCCH-type containing 18                           |
| 100127998 | [No Symbol]  | [No Name]                                                     |
| 6992      | PPP1R11      | protein phosphatase 1, regulatory (inhibitor) subunit 11      |
| 8975      | USP13        | ubiquitin specific peptidase 13 (isopeptidase T-3)            |
| 222255    | ATXN7L1      | ataxin 7-like 1                                               |

|           |              |                                                                                                    |
|-----------|--------------|----------------------------------------------------------------------------------------------------|
| 10320     | IKZF1        | IKAROS family zinc finger 1 (Ikaros)                                                               |
| 100130363 | [No Symbol]  | [No Name]                                                                                          |
| 7472      | WNT2         | wingless-type MMTV integration site family member 2                                                |
| 23192     | ATG4B        | ATG4 autophagy related 4 homolog B ( <i>S. cerevisiae</i> )                                        |
| 6690      | SPINK1       | serine peptidase inhibitor, Kazal type 1                                                           |
| 79577     | CDC73        | cell division cycle 73, Paf1/RNA polymerase II complex component, homolog ( <i>S. cerevisiae</i> ) |
| 8745      | ADAM23       | ADAM metallopeptidase domain 23                                                                    |
| 92689     | FAM114A1     | family with sequence similarity 114, member A1                                                     |
| 79802     | HHIPL2       | HHIP-like 2                                                                                        |
| 284688    | LOC284688    | hypothetical LOC284688                                                                             |
| 55769     | ZNF83        | zinc finger protein 83                                                                             |
| 1791      | DNTT         | deoxynucleotidyltransferase, terminal                                                              |
| 619518    | C1orf191     | chromosome 1 open reading frame 191                                                                |
| 6332      | SCN7A        | sodium channel, voltage-gated, type VII, alpha                                                     |
| 7159      | TP53BP2      | tumor protein p53 binding protein, 2                                                               |
| 55300     | PI4K2B       | phosphatidylinositol 4-kinase type 2 beta                                                          |
| 83661     | MS4A8B       | membrane-spanning 4-domains, subfamily A, member 8B                                                |
| 83953     | FCAMR        | Fc receptor, IgA, IgM, high affinity                                                               |
| 55252     | ASXL2        | additional sex combs like 2 ( <i>Drosophila</i> )                                                  |
| 3097      | HIVEP2       | human immunodeficiency virus type I enhancer binding protein 2                                     |
| 346711    | MRPL49P2     | mitochondrial ribosomal protein L49 pseudogene 2                                                   |
| 5706      | PSMC6        | proteasome (prosome, macropain) 26S subunit, ATPase, 6                                             |
| 7373      | COL14A1      | collagen, type XIV, alpha 1                                                                        |
| 83989     | FAM172A      | family with sequence similarity 172, member A                                                      |
| 283303    | C11orf36     | chromosome 11 open reading frame 36                                                                |
| 100133124 | LOC100133124 | cytochrome c oxidase subunit 7B, mitochondrial-like                                                |
| 326343    | MT1DP        | metallothionein 1D, pseudogene                                                                     |
| 145757    | LOC145757    | hypothetical LOC145757                                                                             |
| 342909    | ZNF284       | zinc finger protein 284                                                                            |
| 369       | ARAF         | v-raf murine sarcoma 3611 viral oncogene homolog                                                   |
| 27190     | IL17B        | interleukin 17B                                                                                    |
| 389337    | ARHGEF37     | Rho guanine nucleotide exchange factor (GEF) 37                                                    |
| 2570      | GABRR2       | gamma-aminobutyric acid (GABA) receptor, rho 2                                                     |
| 79740     | ZBBX         | zinc finger, B-box domain containing                                                               |
| 56171     | DNAH7        | dynein, axonemal, heavy chain 7                                                                    |

|           |             |                                                                   |
|-----------|-------------|-------------------------------------------------------------------|
| 5322      | PLA2G5      | phospholipase A2, group V                                         |
| 10671     | DCTN6       | dynactin 6                                                        |
| 4188      | MDFI        | MyoD family inhibitor                                             |
| 112724    | RDH13       | retinol dehydrogenase 13 (all-trans/9-cis)                        |
| 100129335 | [No Symbol] | [No Name]                                                         |
| 656       | BMP8B       | bone morphogenetic protein 8b                                     |
| 5095      | PCCA        | propionyl CoA carboxylase, alpha polypeptide                      |
| 9427      | ECEL1       | endothelin converting enzyme-like 1                               |
| 126006    | PCP2        | Purkinje cell protein 2                                           |
| 100133180 | DDX3YP1     | DEAD (Asp-Glu-Ala-Asp) box polypeptide 3, Y-linked pseudogene 1   |
| 159963    | SLC5A12     | solute carrier family 5 (sodium/glucose cotransporter), member 12 |
| 2492      | FSHR        | follicle stimulating hormone receptor                             |
| 51088     | KLHL5       | kelch-like 5 (Drosophila)                                         |
| 8525      | DGKZ        | diacylglycerol kinase, zeta                                       |
| 10609     | LEPREL4     | leprecan-like 4                                                   |
| 6811      | STX5        | syntaxin 5                                                        |
| 7161      | TP73        | tumor protein p73                                                 |
| 3620      | IDO1        | indoleamine 2,3-dioxygenase 1                                     |
| 57212     | TP73-AS1    | TP73 antisense RNA 1 (non-protein coding)                         |
| 440675    | NBPF12      | neuroblastoma breakpoint family, member 12                        |
| 11185     | INMT        | indolethylamine N-methyltransferase                               |
| 343508    | LOC343508   | aconitate hydratase, mitochondrial-like                           |
| 10232     | MSLN        | mesothelin                                                        |
| 6368      | CCL23       | chemokine (C-C motif) ligand 23                                   |
| 55634     | ZNF673      | zinc finger family member 673                                     |
| 10815     | CPLX1       | complexin 1                                                       |
| 729591    | [No Symbol] | [No Name]                                                         |
| 642574    | LOC642574   | IQ motif and ankyrin repeat domain-containing protein LOC642574   |
| 153571    | C5orf38     | chromosome 5 open reading frame 38                                |
| 343505    | NBPF7       | neuroblastoma breakpoint family, member 7                         |
| 4922      | NTS         | neurotensin                                                       |
| 10533     | ATG7        | ATG7 autophagy related 7 homolog (S. cerevisiae)                  |
| 89869     | PLCZ1       | phospholipase C, zeta 1                                           |
| 132205    | [No Symbol] | [No Name]                                                         |
| 100131039 | [No Symbol] | [No Name]                                                         |



|           |              |                                                                   |
|-----------|--------------|-------------------------------------------------------------------|
| 645626    | LOC645626    | coiled-coil domain containing 29-like                             |
| 54845     | ESRP1        | epithelial splicing regulatory protein 1                          |
| 29964     | PRICKLE4     | prickle homolog 4 (Drosophila)                                    |
| 54467     | ANKIB1       | ankyrin repeat and IBR domain containing 1                        |
| 146279    | TEKT5        | tektin 5                                                          |
| 1611      | DAP          | death-associated protein                                          |
| 642319    | LOC642319    | transgelin 2 pseudogene                                           |
| 6786      | STIM1        | stromal interaction molecule 1                                    |
| 338699    | ANKRD42      | ankyrin repeat domain 42                                          |
| 1797      | DOM3Z        | dom-3 homolog Z (C. elegans)                                      |
| 5005      | ORM2         | orosomuroid 2                                                     |
| 100129149 | LOC100129149 | hypothetical protein LOC100129149                                 |
| 59340     | HRH4         | histamine receptor H4                                             |
| 81579     | PLA2G12A     | phospholipase A2, group X1IA                                      |
| 202865    | C7orf33      | chromosome 7 open reading frame 33                                |
| 100132448 | [No Symbol]  | [No Name]                                                         |
| 391807    | [No Symbol]  | [No Name]                                                         |
| 441869    | LOC441869    | hypothetical protein LOC441869                                    |
| 2158      | F9           | coagulation factor IX                                             |
| 442058    | LOC442058    | replication protein A 14 kDa subunit-like                         |
| 139231    | FAM199X      | family with sequence similarity 199, X-linked                     |
| 3467      | IFNW1        | interferon, omega 1                                               |
| 79845     | RNF122       | ring finger protein 122                                           |
| 100129381 | LOC100129381 | ribosomal protein S7 pseudogene                                   |
| 767598    | SNORD114-20  | small nucleolar RNA, C/D box 114-20                               |
| 390079    | OR52E8       | olfactory receptor, family 52, subfamily E, member 8              |
| 6578      | SLCO2A1      | solute carrier organic anion transporter family, member 2A1       |
| 728763    | LOC728763    | rootletin-like                                                    |
| 153222    | C5orf41      | chromosome 5 open reading frame 41                                |
| 3748      | KCNC3        | potassium voltage-gated channel, Shaw-related subfamily, member 3 |
| 22925     | PLA2R1       | phospholipase A2 receptor 1, 180kDa                               |
| 389174    | [No Symbol]  | [No Name]                                                         |
| 728815    | LOC728815    | cytokine receptor-like factor 3 pseudogene                        |
| 374907    | B3GNT8       | UDP-GlcNAc:betaGal beta-1,3-N-acetylglucosaminyltransferase 8     |
| 390211    | KRT8P26      | keratin 8 pseudogene 26                                           |

|           |              |                                                                                                          |
|-----------|--------------|----------------------------------------------------------------------------------------------------------|
| 57403     | RAB22A       | RAB22A, member RAS oncogene family                                                                       |
| 78989     | COLEC11      | collectin sub-family member 11                                                                           |
| 10071     | MUC12        | mucin 12, cell surface associated                                                                        |
| 282890    | ZNF311       | zinc finger protein 311                                                                                  |
| 200576    | PIKFYVE      | phosphoinositide kinase, FYVE finger containing                                                          |
| 838       | CASP5        | caspase 5, apoptosis-related cysteine peptidase                                                          |
| 2897      | GRIK1        | glutamate receptor, ionotropic, kainate 1                                                                |
| 100128966 | LOC100128966 | similar to hCG2045131                                                                                    |
| 79490     | OR10G6       | olfactory receptor, family 10, subfamily G, member 6                                                     |
| 119678    | OR52E2       | olfactory receptor, family 52, subfamily E, member 2                                                     |
| 54947     | LPCAT2       | lysophosphatidylcholine acyltransferase 2                                                                |
| 143241    | DYDC1        | DPY30 domain containing 1                                                                                |
| 100130816 | [No Symbol]  | [No Name]                                                                                                |
| 100128660 | [No Symbol]  | [No Name]                                                                                                |
| 3663      | IRF5         | interferon regulatory factor 5                                                                           |
| 644042    | SLC25A5P6    | solute carrier family 25 (mitochondrial carrier; adenine nucleotide translocator), member 5 pseudogene 6 |
| 389369    | [No Symbol]  | [No Name]                                                                                                |
| 89782     | LMLN         | leishmanolysin-like (metallopeptidase M8 family)                                                         |
| 6092      | ROBO2        | roundabout, axon guidance receptor, homolog 2 (Drosophila)                                               |
| 388555    | IGFL3        | IGF-like family member 3                                                                                 |
| 134147    | CMBL         | carboxymethylenebutenolidase homolog (Pseudomonas)                                                       |
| 113540    | CMTM1        | CKLF-like MARVEL transmembrane domain containing 1                                                       |
| 140101    | RBMY2MP      | RNA binding motif protein, Y-linked, family 2, member M pseudogene                                       |
| 57369     | GJD2         | gap junction protein, delta 2, 36kDa                                                                     |
| 1048      | CEACAM5      | carcinoembryonic antigen-related cell adhesion molecule 5                                                |
| 50674     | NEUROG3      | neurogenin 3                                                                                             |
| 56062     | KLHL4        | kelch-like 4 (Drosophila)                                                                                |
| 84866     | TMEM25       | transmembrane protein 25                                                                                 |
| 157530    | ST13P6       | suppression of tumorigenicity 13 (colon carcinoma) (Hsp70 interacting protein) pseudogene 6              |
| 84458     | LCOR         | ligand dependent nuclear receptor corepressor                                                            |
| 652423    | LOC652423    | nucleophosmin (nucleolar phosphoprotein B23, numatrin) pseudogene                                        |
| 3834      | KIF25        | kinesin family member 25                                                                                 |
| 5349      | FXD3         | FXD domain containing ion transport regulator 3                                                          |
| 260293    | CYP4X1       | cytochrome P450, family 4, subfamily X, polypeptide 1                                                    |
| 9378      | NRXN1        | neurexin 1                                                                                               |

|           |              |                                                                                                   |
|-----------|--------------|---------------------------------------------------------------------------------------------------|
| 10261     | IGSF6        | immunoglobulin superfamily, member 6                                                              |
| 3235      | HOXD9        | homeobox D9                                                                                       |
| 79804     | NBLA00301    | Nbla00301                                                                                         |
| 10716     | TBR1         | T-box, brain, 1                                                                                   |
| 342510    | CD300E       | CD300e molecule                                                                                   |
| 342527    | SMTNL2       | smoothelin-like 2                                                                                 |
| 254950    | KRTAP15-1    | keratin associated protein 15-1                                                                   |
| 3567      | IL5          | interleukin 5 (colony-stimulating factor, eosinophil)                                             |
| 7414      | VCL          | vinculin                                                                                          |
| 10282     | BET1         | blocked early in transport 1 homolog ( <i>S. cerevisiae</i> )                                     |
| 23633     | KPNA6        | karyopherin alpha 6 (importin alpha 7)                                                            |
| 7837      | PXDN         | peroxidasin homolog ( <i>Drosophila</i> )                                                         |
| 7752      | ZNF200       | zinc finger protein 200                                                                           |
| 123876    | ACSM2A       | acyl-CoA synthetase medium-chain family member 2A                                                 |
| 55785     | FGD6         | FYVE, RhoGEF and PH domain containing 6                                                           |
| 55225     | RAVER2       | ribonucleoprotein, PTB-binding 2                                                                  |
| 80086     | TUBA4B       | tubulin, alpha 4b (pseudogene)                                                                    |
| 100128161 | [No Symbol]  | [No Name]                                                                                         |
| 359748    | MRPL49P1     | mitochondrial ribosomal protein L49 pseudogene 1                                                  |
| 1080      | CFTR         | cystic fibrosis transmembrane conductance regulator (ATP-binding cassette sub-family C, member 7) |
| 100133236 | [No Symbol]  | [No Name]                                                                                         |
| 54795     | TRPM4        | transient receptor potential cation channel, subfamily M, member 4                                |
| 100128790 | LOC100128790 | lysophospholipase II pseudogene                                                                   |
| 6326      | SCN2A        | sodium channel, voltage-gated, type II, alpha subunit                                             |
| 400058    | MKRN9P       | makorin ring finger protein 9, pseudogene                                                         |
| 391578    | LOC391578    | MAF1 homolog ( <i>S. cerevisiae</i> ) pseudogene                                                  |
| 116285    | ACSM1        | acyl-CoA synthetase medium-chain family member 1                                                  |
| 956       | ENTPD3       | ectonucleoside triphosphate diphosphohydrolase 3                                                  |
| 8226      | HDHD1        | haloacid dehalogenase-like hydrolase domain containing 1                                          |
| 780776    | FAM18A       | family with sequence similarity 18, member A                                                      |
| 10060     | ABCC9        | ATP-binding cassette, sub-family C (CFTR/MRP), member 9                                           |
| 137682    | C8orf38      | chromosome 8 open reading frame 38                                                                |
| 10846     | PDE10A       | phosphodiesterase 10A                                                                             |
| 8464      | SUPT3H       | suppressor of Ty 3 homolog ( <i>S. cerevisiae</i> )                                               |
| 400793    | C1orf226     | chromosome 1 open reading frame 226                                                               |

|           |             |                                                                                  |
|-----------|-------------|----------------------------------------------------------------------------------|
| 828       | CAPS        | calcyphosine                                                                     |
| 4690      | NCK1        | NCK adaptor protein 1                                                            |
| 8324      | FZD7        | frizzled family receptor 7                                                       |
| 642968    | FAM163B     | family with sequence similarity 163, member B                                    |
| 10331     | B3GNT3      | UDP-GlcNAc:betaGal beta-1,3-N-acetylglucosaminyltransferase 3                    |
| 168417    | ZNF679      | zinc finger protein 679                                                          |
| 7982      | ST7         | suppression of tumorigenicity 7                                                  |
| 1089      | CEACAM4     | carcinoembryonic antigen-related cell adhesion molecule 4                        |
| 54540     | FAM193B     | family with sequence similarity 193, member B                                    |
| 5122      | PCSK1       | proprotein convertase subtilisin/kexin type 1                                    |
| 100130226 | [No Symbol] | [No Name]                                                                        |
| 1780      | DYNC1I1     | dynein, cytoplasmic 1, intermediate chain 1                                      |
| 574016    | CLLU1OS     | chronic lymphocytic leukemia up-regulated 1 opposite strand                      |
| 390637    | C15orf58    | chromosome 15 open reading frame 58                                              |
| 7941      | PLA2G7      | phospholipase A2, group VII (platelet-activating factor acetylhydrolase, plasma) |
| 10492     | SYNCRIP     | synaptotagmin binding, cytoplasmic RNA interacting protein                       |
| 151825    | KRT18P43    | keratin 18 pseudogene 43                                                         |
| 1303      | COL12A1     | collagen, type XII, alpha 1                                                      |
| 10048     | RANBP9      | RAN binding protein 9                                                            |
| 9991      | ROD1        | ROD1 regulator of differentiation 1 ( <i>S. pombe</i> )                          |
| 27123     | DKK2        | dickkopf homolog 2 ( <i>Xenopus laevis</i> )                                     |
| 83957     | FKSG43      | FERM domain-containing protein 8 pseudogene                                      |
| 139378    | GPR112      | G protein-coupled receptor 112                                                   |
| 89953     | KLC4        | kinesin light chain 4                                                            |
| 10840     | ALDH1L1     | aldehyde dehydrogenase 1 family, member L1                                       |
| 26514     | RPL34P1     | ribosomal protein L34 pseudogene 1                                               |
| 1003      | CDH5        | cadherin 5, type 2 (vascular endothelium)                                        |
| 133308    | NHEDC2      | Na <sup>+</sup> /H <sup>+</sup> exchanger domain containing 2                    |
| 644232    | [No Symbol] | [No Name]                                                                        |
| 402226    | CCT5P1      | chaperonin containing TCP1, subunit 5 (epsilon) pseudogene 1                     |
| 391081    | HSD3BP5     | hydroxy-delta-5-steroid dehydrogenase, 3 beta, pseudogene 5                      |
| 1363      | CPE         | carboxypeptidase E                                                               |
| 7310      | ZRSR1       | zinc finger (CCCH type), RNA-binding motif and serine/arginine rich 1            |
| 100128916 | [No Symbol] | [No Name]                                                                        |
| 6738      | TROVE2      | TROVE domain family, member 2                                                    |

|           |              |                                                                                                       |
|-----------|--------------|-------------------------------------------------------------------------------------------------------|
| 117155    | CATSPER2     | cation channel, sperm associated 2                                                                    |
| 55034     | MOCOS        | molybdenum cofactor sulfurase                                                                         |
| 728098    | LOC728098    | mitogen-activated protein kinase 1 interacting protein 1-like pseudogene                              |
| 100131512 | [No Symbol]  | [No Name]                                                                                             |
| 131920    | TMEM207      | transmembrane protein 207                                                                             |
| 100130557 | LOC100130557 | hypothetical LOC100130557                                                                             |
| 6277      | S100A6       | S100 calcium binding protein A6                                                                       |
| 100129520 | LOC100129520 | testis expressed sequence 13-like                                                                     |
| 728661    | SLC35E2B     | solute carrier family 35, member E2B                                                                  |
| 5786      | PTPRA        | protein tyrosine phosphatase, receptor type, A                                                        |
| 100129212 | [No Symbol]  | [No Name]                                                                                             |
| 22992     | KDM2A        | lysine (K)-specific demethylase 2A                                                                    |
| 10249     | GLYAT        | glycine-N-acyltransferase                                                                             |
| 139952    | LOC139952    | LIM domain kinase 2 pseudogene                                                                        |
| 6445      | SGCG         | sarcoglycan, gamma (35kDa dystrophin-associated glycoprotein)                                         |
| 54606     | DDX56        | DEAD (Asp-Glu-Ala-Asp) box polypeptide 56                                                             |
| 7059      | THBS3        | thrombospondin 3                                                                                      |
| 3683      | ITGAL        | integrin, alpha L (antigen CD11A (p180), lymphocyte function-associated antigen 1; alpha polypeptide) |
| 146760    | RTN4RL1      | reticulon 4 receptor-like 1                                                                           |
| 26355     | FAM162A      | family with sequence similarity 162, member A                                                         |
| 60592     | SCOC         | short coiled-coil protein                                                                             |
| 3706      | ITPKA        | inositol-trisphosphate 3-kinase A                                                                     |
| 100133307 | CYP1D1       | cytochrome P450, family 1, subfamily D pseudogene                                                     |
| 23022     | PALLD        | palladin, cytoskeletal associated protein                                                             |
| 100129848 | [No Symbol]  | [No Name]                                                                                             |
| 100131060 | LOC100131060 | hypothetical LOC100131060                                                                             |
| 647001    | GAPDHP35     | glyceraldehyde 3 phosphate dehydrogenase pseudogene 35                                                |
| 125113    | KRT222       | keratin 222                                                                                           |
| 10516     | FBLN5        | fibulin 5                                                                                             |
| 100129730 | [No Symbol]  | [No Name]                                                                                             |
| 3973      | LHCGR        | luteinizing hormone/choriogonadotropin receptor                                                       |
| 127247    | ASB17        | ankyrin repeat and SOCS box containing 17                                                             |
| 645301    | [No Symbol]  | [No Name]                                                                                             |
| 340485    | ACER2        | alkaline ceramidase 2                                                                                 |
| 730110    | LOC730110    | zinc finger protein 492 pseudogene                                                                    |

|           |              |                                                              |
|-----------|--------------|--------------------------------------------------------------|
| 729085    | FAM198A      | family with sequence similarity 198, member A                |
| 80210     | ARMC9        | armadillo repeat containing 9                                |
| 339761    | CYP27C1      | cytochrome P450, family 27, subfamily C, polypeptide 1       |
| 200150    | PLD5         | phospholipase D family, member 5                             |
| 23554     | TSPAN12      | tetraspanin 12                                               |
| 337967    | KRTAP6-2     | keratin associated protein 6-2                               |
| 652276    | LOC652276    | hypothetical LOC652276                                       |
| 79706     | PRKRIP1      | PRKR interacting protein 1 (IL11 inducible)                  |
| 23581     | CASP14       | caspase 14, apoptosis-related cysteine peptidase             |
| 391844    | [No Symbol]  | [No Name]                                                    |
| 56999     | ADAMTS9      | ADAM metallopeptidase with thrombospondin type 1 motif, 9    |
| 100130288 | [No Symbol]  | [No Name]                                                    |
| 57216     | VANGL2       | vang-like 2 (van gogh, Drosophila)                           |
| 160762    | CCDC63       | coiled-coil domain containing 63                             |
| 22899     | ARHGEF15     | Rho guanine nucleotide exchange factor (GEF) 15              |
| 2186      | BPTF         | bromodomain PHD finger transcription factor                  |
| 3326      | HSP90AB1     | heat shock protein 90kDa alpha (cytosolic), class B member 1 |
| 201305    | SPNS3        | spinster homolog 3 (Drosophila)                              |
| 150921    | TCF23        | transcription factor 23                                      |
| 100130307 | LOC100130307 | speedy homolog E2 (Xenopus laevis) pseudogene                |
| 389676    | LOC389676    | hypothetical LOC389676                                       |
| 100132809 | [No Symbol]  | [No Name]                                                    |
| 152189    | CMTM8        | CKLF-like MARVEL transmembrane domain containing 8           |
| 1415      | CRYBB2       | crystallin, beta B2                                          |
| 285362    | SUMF1        | sulfatase modifying factor 1                                 |
| 100131469 | RPSAP62      | ribosomal protein SA pseudogene 62                           |
| 127731    | VWA5B1       | von Willebrand factor A domain containing 5B1                |
| 326627    | RANBP20P     | RAN binding protein 20 pseudogene                            |
| 10594     | PRPF8        | PRP8 pre-mRNA processing factor 8 homolog (S. cerevisiae)    |
| 9320      | TRIP12       | thyroid hormone receptor interactor 12                       |
| 26036     | ZNF451       | zinc finger protein 451                                      |
| 100128259 | [No Symbol]  | [No Name]                                                    |
| 2160      | F11          | coagulation factor XI                                        |
| 54431     | DNAJC10      | DnaJ (Hsp40) homolog, subfamily C, member 10                 |
| 3631      | INPP4A       | inositol polyphosphate-4-phosphatase, type I, 107kDa         |

|           |              |                                                                                             |
|-----------|--------------|---------------------------------------------------------------------------------------------|
| 5067      | CNTN3        | contactin 3 (plasmacytoma associated)                                                       |
| 79955     | PDZD7        | PDZ domain containing 7                                                                     |
| 100128542 | LOC100128542 | hypothetical protein LOC100128542                                                           |
| 23408     | SIRT5        | sirtuin 5                                                                                   |
| 100130448 | LOC100130448 | MRS2 magnesium homeostasis factor homolog ( <i>S. cerevisiae</i> ) pseudogene               |
| 1716      | DGUOK        | deoxyguanosine kinase                                                                       |
| 7681      | MKRN3        | makorin ring finger protein 3                                                               |
| 221806    | VWDE         | von Willebrand factor D and EGF domains                                                     |
| 4585      | MUC4         | mucin 4, cell surface associated                                                            |
| 730226    | [No Symbol]  | [No Name]                                                                                   |
| 129881    | C2orf77      | chromosome 2 open reading frame 77                                                          |
| 7903      | ST8SIA4      | ST8 alpha-N-acetyl-neuraminide alpha-2,8-sialyltransferase 4                                |
| 8705      | B3GALT4      | UDP-Gal:betaGlcNAc beta 1,3-galactosyltransferase, polypeptide 4                            |
| 283579    | C14orf178    | chromosome 14 open reading frame 178                                                        |
| 100131348 | LOC100131348 | adaptor-related protein complex 2, beta 1 subunit pseudogene                                |
| 2110      | ETFDH        | electron-transferring-flavoprotein dehydrogenase                                            |
| 339855    | KY           | kyphoscoliosis peptidase                                                                    |
| 5359      | PLSCR1       | phospholipid scramblase 1                                                                   |
| 202181    | LOC202181    | hypothetical LOC202181                                                                      |
| 8342      | HIST1H2BM    | histone cluster 1, H2bm                                                                     |
| 400454    | UNQ9370      | IFMQ9370                                                                                    |
| 729179    | [No Symbol]  | [No Name]                                                                                   |
| 441505    | LOC441505    | stress-induced-phosphoprotein 1 pseudogene                                                  |
| 79582     | SPAG16       | sperm associated antigen 16                                                                 |
| 133558    | HEATR7B2     | HEAT repeat family member 7B2                                                               |
| 6820      | SULT2B1      | sulfotransferase family, cytosolic, 2B, member 1                                            |
| 126755    | LRRC38       | leucine rich repeat containing 38                                                           |
| 53833     | IL20RB       | interleukin 20 receptor beta                                                                |
| 8995      | TNFSF18      | tumor necrosis factor (ligand) superfamily, member 18                                       |
| 9867      | PJA2         | praja ring finger 2                                                                         |
| 646560    | [No Symbol]  | [No Name]                                                                                   |
| 5648      | MASP1        | mannan-binding lectin serine peptidase 1 (C4/C2 activating component of Ra-reactive factor) |
| 55789     | DEPDC1B      | DEP domain containing 1B                                                                    |
| 5569      | PKIA         | protein kinase (cAMP-dependent, catalytic) inhibitor alpha                                  |
| 115       | ADCY9        | adenylate cyclase 9                                                                         |

|           |              |                                                                               |
|-----------|--------------|-------------------------------------------------------------------------------|
| 266747    | RGL4         | ral guanine nucleotide dissociation stimulator-like 4                         |
| 85456     | TNKS1BP1     | tankyrase 1 binding protein 1, 182kDa                                         |
| 84933     | C8orf76      | chromosome 8 open reading frame 76                                            |
| 81789     | TIGD6        | tigger transposable element derived 6                                         |
| 100131550 | CNN2P12      | calponin 2 pseudogene 12                                                      |
| 7840      | ALMS1        | Alstrom syndrome 1                                                            |
| 167465    | ZNF366       | zinc finger protein 366                                                       |
| 100128438 | [No Symbol]  | [No Name]                                                                     |
| 441097    | [No Symbol]  | [No Name]                                                                     |
| 391123    | VSIG8        | V-set and immunoglobulin domain containing 8                                  |
| 9098      | USP6         | ubiquitin specific peptidase 6 (Tre-2 oncogene)                               |
| 100130969 | [No Symbol]  | [No Name]                                                                     |
| 9202      | ZMYM4        | zinc finger, MYM-type 4                                                       |
| 284912    | LOC284912    | hypothetical LOC284912                                                        |
| 5581      | PRKCE        | protein kinase C, epsilon                                                     |
| 149466    | C1orf210     | chromosome 1 open reading frame 210                                           |
| 646583    | RPS4XP18     | ribosomal protein S4X pseudogene 18                                           |
| 9022      | CLIC3        | chloride intracellular channel 3                                              |
| 3710      | ITPR3        | inositol 1,4,5-trisphosphate receptor, type 3                                 |
| 2135      | EXTL2        | exostoses (multiple)-like 2                                                   |
| 93082     | NEURL3       | neuralized homolog 3 (Drosophila) pseudogene                                  |
| 339       | APOBEC1      | apolipoprotein B mRNA editing enzyme, catalytic polypeptide 1                 |
| 6507      | SLC1A3       | solute carrier family 1 (glial high affinity glutamate transporter), member 3 |
| 442663    | [No Symbol]  | [No Name]                                                                     |
| 100128098 | LOC100128098 | hypothetical LOC100128098                                                     |
| 100129726 | LOC100129726 | hypothetical LOC100129726                                                     |
| 149069    | DCDC2B       | doublecortin domain containing 2B                                             |
| 60685     | ZFAND3       | zinc finger, AN1-type domain 3                                                |
| 22854     | NTNG1        | netrin G1                                                                     |
| 200959    | GABRR3       | gamma-aminobutyric acid (GABA) receptor, rho 3                                |
| 84570     | COL25A1      | collagen, type XXV, alpha 1                                                   |
| 55184     | C20orf12     | chromosome 20 open reading frame 12                                           |
| 3827      | KNG1         | kininogen 1                                                                   |
| 55696     | RBM22        | RNA binding motif protein 22                                                  |
| 9100      | USP10        | ubiquitin specific peptidase 10                                               |



|           |              |                                                                                           |
|-----------|--------------|-------------------------------------------------------------------------------------------|
| 57154     | SMURF1       | SMAD specific E3 ubiquitin protein ligase 1                                               |
| 100132531 | [No Symbol]  | [No Name]                                                                                 |
| 442382    | LOC442382    | ATPase, Ca++ transporting, plasma membrane 1 pseudogene                                   |
| 51201     | ZDHC2        | zinc finger, DHHC-type containing 2                                                       |
| 100131017 | ZNF316       | zinc finger protein 316                                                                   |
| 5259      | PHKBP2       | phosphorylase kinase, beta pseudogene 2                                                   |
| 1956      | EGFR         | epidermal growth factor receptor                                                          |
| 53632     | PRKAG3       | protein kinase, AMP-activated, gamma 3 non-catalytic subunit                              |
| 57604     | KIAA1456     | KIAA1456                                                                                  |
| 1118      | CHIT1        | chitinase 1 (chitotriosidase)                                                             |
| 390174    | OR9G1        | olfactory receptor, family 9, subfamily G, member 1                                       |
| 57404     | CYP20A1      | cytochrome P450, family 20, subfamily A, polypeptide 1                                    |
| 643496    | LOC643496    | hCG1660379                                                                                |
| 10230     | NBR2         | neighbor of BRCA1 gene 2 (non-protein coding)                                             |
| 389158    | PLSCR5       | phospholipid scramblase family, member 5                                                  |
| 6661      | SOX5P        | SRY (sex determining region Y)-box 5 pseudogene                                           |
| 4197      | [No Symbol]  | [No Name]                                                                                 |
| 3780      | KCNN1        | potassium intermediate/small conductance calcium-activated channel, subfamily N, member 1 |
| 132203    | SNTN         | sentan, cilia apical structure protein                                                    |
| 133482    | SLCO6A1      | solute carrier organic anion transporter family, member 6A1                               |
| 100128238 | LOC100128238 | KIAA0895-like pseudogene                                                                  |
| 100130357 | LOC100130357 | hypothetical LOC100130357                                                                 |
| 146512    | FLJ30679     | hypothetical protein FLJ30679                                                             |
| 8409      | UXT          | ubiquitously-expressed transcript                                                         |
| 727936    | GXYLT2       | glucoside xylosyltransferase 2                                                            |
| 136371    | ASB10        | ankyrin repeat and SOCS box containing 10                                                 |
| 25862     | USP49        | ubiquitin specific peptidase 49                                                           |
| 9390      | SLC22A13     | solute carrier family 22 (organic anion transporter), member 13                           |
| 8761      | PABPC4       | poly(A) binding protein, cytoplasmic 4 (inducible form)                                   |
| 645638    | LOC645638    | WDM1-like pseudogene                                                                      |
| 727       | C5           | complement component 5                                                                    |
| 2272      | FHIT         | fragile histidine triad gene                                                              |
| 100131483 | [No Symbol]  | [No Name]                                                                                 |
| 6414      | SEPP1        | selenoprotein P, plasma, 1                                                                |
| 645852    | LOC645852    | splicing factor 3a, subunit 2, 66kDa pseudogene                                           |

|           |              |                                                                                                                |
|-----------|--------------|----------------------------------------------------------------------------------------------------------------|
| 352909    | C19orf51     | chromosome 19 open reading frame 51                                                                            |
| 6170      | RPL39        | ribosomal protein L39                                                                                          |
| 163933    | FAM43B       | family with sequence similarity 43, member B                                                                   |
| 26150     | RIBC2        | RIB43A domain with coiled-coils 2                                                                              |
| 64599     | GIGYF1       | GRB10 interacting GYF protein 1                                                                                |
| 347252    | IGFBPL1      | insulin-like growth factor binding protein-like 1                                                              |
| 113802    | HENMT1       | HEN1 methyltransferase homolog 1 (Arabidopsis)                                                                 |
| 353324    | SPATA12      | spermatogenesis associated 12                                                                                  |
| 340351    | AGBL3        | ATP/GTP binding protein-like 3                                                                                 |
| 400456    | LOC400456    | hypothetical LOC400456                                                                                         |
| 390007    | TOMM22P5     | translocase of outer mitochondrial membrane 22 homolog (yeast) pseudogene 5                                    |
| 642448    | KRT18P23     | keratin 18 pseudogene 23                                                                                       |
| 57159     | TRIM54       | tripartite motif containing 54                                                                                 |
| 442233    | SMARCE1P2    | SWI/SNF related, matrix associated, actin dependent regulator of chromatin, subfamily e, member 1 pseudogene 2 |
| 9448      | MAP4K4       | mitogen-activated protein kinase kinase kinase 4                                                               |
| 10406     | WFDC2        | WAP four-disulfide core domain 2                                                                               |
| 56776     | FMN2         | formin 2                                                                                                       |
| 84561     | SLC12A8      | solute carrier family 12 (potassium/chloride transporters), member 8                                           |
| 79733     | E2F8         | E2F transcription factor 8                                                                                     |
| 5378      | PMS1         | PMS1 postmeiotic segregation increased 1 (S. cerevisiae)                                                       |
| 57826     | RAP2C        | RAP2C, member of RAS oncogene family                                                                           |
| 401546    | C9orf152     | chromosome 9 open reading frame 152                                                                            |
| 390924    | EEF1A1P7     | eukaryotic translation elongation factor 1 alpha 1 pseudogene 7                                                |
| 5606      | MAP2K3       | mitogen-activated protein kinase kinase 3                                                                      |
| 254187    | TSGA10IP     | testis specific, 10 interacting protein                                                                        |
| 100127936 | LOC100127936 | hypothetical LOC100127936                                                                                      |
| 140701    | ABHD16B      | abhydrolase domain containing 16B                                                                              |
| 2066      | ERBB4        | v-erb-a erythroblastic leukemia viral oncogene homolog 4 (avian)                                               |
| 4856      | NOV          | nephroblastoma overexpressed gene                                                                              |
| 719       | C3AR1        | complement component 3a receptor 1                                                                             |
| 93010     | B3GNT7       | UDP-GlcNAc:betaGal beta-1,3-N-acetylglucosaminyltransferase 7                                                  |
| 729234    | LOC729234    | fumarylacetoacetate hydrolase domain containing 2 pseudogene                                                   |
| 386678    | KRTAP10-11   | keratin associated protein 10-11                                                                               |
| 7018      | TF           | transferrin                                                                                                    |
| 25960     | GPR124       | G protein-coupled receptor 124                                                                                 |

|           |              |                                                                              |
|-----------|--------------|------------------------------------------------------------------------------|
| 7881      | KCNAB1       | potassium voltage-gated channel, shaker-related subfamily, beta member 1     |
| 5993      | RFX5         | regulatory factor X, 5 (influences HLA class II expression)                  |
| 8869      | ST3GAL5      | ST3 beta-galactoside alpha-2,3-sialyltransferase 5                           |
| 100128121 | LOC100128121 | 60S ribosomal protein L9-like                                                |
| 644016    | HSPD1P10     | heat shock 60kDa protein 1 (chaperonin) pseudogene 10                        |
| 10201     | NME6         | non-metastatic cells 6, protein expressed in (nucleoside-diphosphate kinase) |
| 64326     | RFWD2        | ring finger and WD repeat domain 2                                           |
| 85366     | MYLK2        | myosin light chain kinase 2                                                  |
| 81544     | GDPD5        | glycerophosphodiester phosphodiesterase domain containing 5                  |
| 219578    | ZNF804B      | zinc finger protein 804B                                                     |
| 100133135 | [No Symbol]  | [No Name]                                                                    |
| 375686    | SPATC1       | spermatogenesis and centriole associated 1                                   |
| 5568      | PRKACG       | protein kinase, cAMP-dependent, catalytic, gamma                             |
| 100131989 | [No Symbol]  | [No Name]                                                                    |
| 57574     | 4-Mar        | membrane-associated ring finger (C3HC4) 4                                    |
| 440335    | LOC440335    | hypothetical LOC440335                                                       |
| 54870     | QRICH1       | glutamine-rich 1                                                             |
| 261726    | TIPRL        | TIP41, TOR signaling pathway regulator-like ( <i>S. cerevisiae</i> )         |
| 392442    | LOC392442    | BCL2-associated athanogene pseudogene                                        |
| 284252    | KCTD1        | potassium channel tetramerisation domain containing 1                        |
| 201243    | C17orf74     | chromosome 17 open reading frame 74                                          |
| 5692      | PSMB4        | proteasome (prosome, macropain) subunit, beta type, 4                        |
| 390423    | ARF4P3       | ADP-ribosylation factor 4 pseudogene 3                                       |
| 100129781 | LOC100129781 | hypothetical LOC100129781                                                    |
| 1232      | CCR3         | chemokine (C-C motif) receptor 3                                             |
| 8614      | STC2         | stanniocalcin 2                                                              |
| 319130    | HMGB1P14     | high mobility group box 1 pseudogene 14                                      |
| 286094    | LOC286094    | hypothetical LOC286094                                                       |
| 140628    | GATA5        | GATA binding protein 5                                                       |
| 3215      | HOXB5        | homeobox B5                                                                  |
| 203477    | HMGA1P1      | high mobility group AT-hook 1 pseudogene 1                                   |
| 8549      | LGR5         | leucine-rich repeat containing G protein-coupled receptor 5                  |
| 442078    | KRT8P18      | keratin 8 pseudogene 18                                                      |
| 392862    | GRID2IP      | glutamate receptor, ionotropic, delta 2 (Grid2) interacting protein          |
| 222865    | TMEM130      | transmembrane protein 130                                                    |

|           |              |                                                                               |
|-----------|--------------|-------------------------------------------------------------------------------|
| 27303     | RBMS3        | RNA binding motif, single stranded interacting protein 3                      |
| 100132074 | FOXO6        | forkhead box O6                                                               |
| 222537    | HS3ST5       | heparan sulfate (glucosamine) 3-O-sulfotransferase 5                          |
| 4293      | MAP3K9       | mitogen-activated protein kinase kinase kinase 9                              |
| 645726    | [No Symbol]  | [No Name]                                                                     |
| 648708    | [No Symbol]  | [No Name]                                                                     |
| 10586     | MAB21L2      | mab-21-like 2 (C. elegans)                                                    |
| 100129416 | [No Symbol]  | [No Name]                                                                     |
| 643406    | LOC643406    | hypothetical LOC643406                                                        |
| 403314    | APOBEC4      | apolipoprotein B mRNA editing enzyme, catalytic polypeptide-like 4 (putative) |
| 84303     | CHCHD6       | coiled-coil-helix-coiled-coil-helix domain containing 6                       |
| 23122     | CLASP2       | cytoplasmic linker associated protein 2                                       |
| 730978    | CICP5        | capicua homolog (Drosophila) pseudogene 5                                     |
| 389383    | C6orf126     | chromosome 6 open reading frame 126                                           |
| 732       | C8B          | complement component 8, beta polypeptide                                      |
| 55231     | CCDC87       | coiled-coil domain containing 87                                              |
| 100049716 | LOC100049716 | hypothetical LOC100049716                                                     |
| 1488      | CTBP2        | C-terminal binding protein 2                                                  |
| 9678      | PHF14        | PHD finger protein 14                                                         |
| 23333     | DPY19L1      | dpy-19-like 1 (C. elegans)                                                    |
| 29943     | PADI1        | peptidyl arginine deiminase, type I                                           |
| 391026    | LOC391026    | alpha-actinin-4-like                                                          |
| 100133224 | LOC100133224 | hypothetical protein LOC100133224                                             |
| 51179     | HAO2         | hydroxyacid oxidase 2 (long chain)                                            |
| 3930      | LBR          | lamin B receptor                                                              |
| 100130332 | [No Symbol]  | [No Name]                                                                     |
| 5628      | PROSP        | protein S pseudogene (beta)                                                   |
| 647076    | BRD7P2       | bromodomain containing 7 pseudogene 2                                         |
| 116966    | WDR17        | WD repeat domain 17                                                           |
| 23163     | GGA3         | golgi-associated, gamma adaptin ear containing, ARF binding protein 3         |
| 283298    | OLFML1       | olfactomedin-like 1                                                           |
| 26687     | OR4E1        | olfactory receptor, family 4, subfamily E, member 1 (gene/pseudogene)         |
| 4168      | MCF2         | MCF.2 cell line derived transforming sequence                                 |
| 100132658 | LOC100132658 | NSA2 ribosome biogenesis homolog (S. cerevisiae) pseudogene                   |
| 79675     | FASTKD1      | FAST kinase domains 1                                                         |

|           |              |                                                                              |
|-----------|--------------|------------------------------------------------------------------------------|
| 339352    | LOC339352    | putative ATP-binding domain-containing protein 3-like protein-like           |
| 3756      | KCNH1        | potassium voltage-gated channel, subfamily H (eag-related), member 1         |
| 2561      | GABRB2       | gamma-aminobutyric acid (GABA) A receptor, beta 2                            |
| 4493      | MT1E         | metallothionein 1E                                                           |
| 57568     | SIPA1L2      | signal-induced proliferation-associated 1 like 2                             |
| 100132056 | LOC100132056 | dihydrofolate reductase pseudogene                                           |
| 64983     | MRPL32       | mitochondrial ribosomal protein L32                                          |
| 51002     | TPRKB        | TP53RK binding protein                                                       |
| 9260      | PDLIM7       | PDZ and LIM domain 7 (enigma)                                                |
| 100129263 | [No Symbol]  | [No Name]                                                                    |
| 6397      | SEC14L1      | SEC14-like 1 ( <i>S. cerevisiae</i> )                                        |
| 1809      | DPYSL3       | dihydropyrimidinase-like 3                                                   |
| 22821     | RASA3        | RAS p21 protein activator 3                                                  |
| 84103     | C4orf17      | chromosome 4 open reading frame 17                                           |
| 359736    | MRPL15P1     | mitochondrial ribosomal protein L15 pseudogene 1                             |
| 27124     | INPP5J       | inositol polyphosphate-5-phosphatase J                                       |
| 50937     | CDON         | Cdon homolog (mouse)                                                         |
| 56605     | ERO1LB       | ERO1-like beta ( <i>S. cerevisiae</i> )                                      |
| 6391      | SDHC         | succinate dehydrogenase complex, subunit C, integral membrane protein, 15kDa |
| 347127    | FAM75D5      | FAM75-like protein FLJ46321 pseudogene                                       |
| 64420     | SUSD1        | sushi domain containing 1                                                    |
| 827       | CAPN6        | calpain 6                                                                    |
| 340706    | VWA2         | von Willebrand factor A domain containing 2                                  |
| 9356      | SLC22A6      | solute carrier family 22 (organic anion transporter), member 6               |
| 284451    | ODF3L2       | outer dense fiber of sperm tails 3-like 2                                    |
| 150084    | IGSF5        | immunoglobulin superfamily, member 5                                         |
| 54537     | FAM35A       | family with sequence similarity 35, member A                                 |
| 8692      | HYAL2        | hyaluronoglucosaminidase 2                                                   |
| 54937     | SOHLH2       | spermatogenesis and oogenesis specific basic helix-loop-helix 2              |
| 100132215 | LOC100132215 | hypothetical LOC100132215                                                    |
| 23567     | ZNF346       | zinc finger protein 346                                                      |
| 100130623 | [No Symbol]  | [No Name]                                                                    |
| 9733      | SART3        | squamous cell carcinoma antigen recognized by T cells 3                      |
| 100129250 | LOC100129250 | hypothetical LOC100129250                                                    |
| 646021    | LOC646021    | hypothetical protein LOC646021                                               |

|           |              |                                                                                                                 |
|-----------|--------------|-----------------------------------------------------------------------------------------------------------------|
| 762       | CA4          | carbonic anhydrase IV                                                                                           |
| 103910    | MYL12B       | myosin, light chain 12B, regulatory                                                                             |
| 100132891 | LOC100132891 | hypothetical LOC100132891                                                                                       |
| 11034     | DSTN         | destrin (actin depolymerizing factor)                                                                           |
| 55565     | ZNF821       | zinc finger protein 821                                                                                         |
| 4807      | NHLH1        | nescient helix loop helix 1                                                                                     |
| 139221    | MUM1L1       | melanoma associated antigen (mutated) 1-like 1                                                                  |
| 2259      | FGF14        | fibroblast growth factor 14                                                                                     |
| 11222     | MRPL3        | mitochondrial ribosomal protein L3                                                                              |
| 7477      | WNT7B        | wingless-type MMTV integration site family, member 7B                                                           |
| 120321    | CSNK1A1P2    | casein kinase 1, alpha 1 pseudogene 2                                                                           |
| 491       | ATP2B2       | ATPase, Ca <sup>++</sup> transporting, plasma membrane 2                                                        |
| 114188    | SIGLEC29P    | sialic acid binding Ig-like lectin 29, pseudogene                                                               |
| 150519    | LOC150519    | hypothetical LOC150519                                                                                          |
| 6357      | CCL13        | chemokine (C-C motif) ligand 13                                                                                 |
| 6344      | SCTR         | secretin receptor                                                                                               |
| 284611    | FAM102B      | family with sequence similarity 102, member B                                                                   |
| 221223    | CES5A        | carboxylesterase 5A                                                                                             |
| 377007    | KLHL30       | kelch-like 30 (Drosophila)                                                                                      |
| 9957      | HS3ST1       | heparan sulfate (glucosamine) 3-O-sulfotransferase 1                                                            |
| 3704      | ITPA         | inosine triphosphatase (nucleoside triphosphate pyrophosphatase)                                                |
| 400508    | NCRNA00169   | non-protein coding RNA 169                                                                                      |
| 728588    | MS4A18       | membrane-spanning 4-domains, subfamily A, member 18                                                             |
| 2583      | B4GALNT1     | beta-1,4-N-acetyl-galactosaminyl transferase 1                                                                  |
| 2645      | GCK          | glucokinase (hexokinase 4)                                                                                      |
| 400863    | FLJ46020     | FLJ46020 protein                                                                                                |
| 55083     | KIF26B       | kinesin family member 26B                                                                                       |
| 100132473 | [No Symbol]  | [No Name]                                                                                                       |
| 3032      | HADHB        | hydroxyacyl-CoA dehydrogenase/3-ketoacyl-CoA thiolase/enoyl-CoA hydratase (trifunctional protein), beta subunit |
| 83871     | RAB34        | RAB34, member RAS oncogene family                                                                               |
| 5134      | PDCD2        | programmed cell death 2                                                                                         |
| 81270     | OR52B5P      | olfactory receptor, family 52, subfamily B, member 5 pseudogene                                                 |
| 647162    | KRT18P33     | keratin 18 pseudogene 33                                                                                        |
| 4605      | MYBL2        | v-myb myeloblastosis viral oncogene homolog (avian)-like 2                                                      |
| 8595      | OR5D2P       | olfactory receptor, family 5, subfamily D, member 2 pseudogene                                                  |

|           |              |                                                                                         |
|-----------|--------------|-----------------------------------------------------------------------------------------|
| 100132348 | LOC100132348 | similar to hCG1817457                                                                   |
| 10200     | MPHOSPH6     | M-phase phosphoprotein 6                                                                |
| 387826    | [No Symbol]  | [No Name]                                                                               |
| 4985      | OPRD1        | opioid receptor, delta 1                                                                |
| 64094     | SMOC2        | SPARC related modular calcium binding 2                                                 |
| 135886    | WBSCR28      | Williams-Beuren syndrome chromosome region 28                                           |
| 286006    | C7orf53      | chromosome 7 open reading frame 53                                                      |
| 57829     | ZP4          | zona pellucida glycoprotein 4                                                           |
| 4995      | OR3A2        | olfactory receptor, family 3, subfamily A, member 2                                     |
| 89876     | C3orf15      | chromosome 3 open reading frame 15                                                      |
| 163059    | ZNF433       | zinc finger protein 433                                                                 |
| 25836     | NIPBL        | Nipped-B homolog (Drosophila)                                                           |
| 84524     | ZC3H8        | zinc finger CCCH-type containing 8                                                      |
| 730974    | LOC730974    | hypothetical LOC730974                                                                  |
| 114795    | TMEM132B     | transmembrane protein 132B                                                              |
| 1729      | DIAPH1       | diaphanous homolog 1 (Drosophila)                                                       |
| 254827    | NAALADL2     | N-acetylated alpha-linked acidic dipeptidase-like 2                                     |
| 100131661 | FTLP5        | ferritin, light polypeptide pseudogene 5                                                |
| 6900      | CNTN2        | contactin 2 (axonal)                                                                    |
| 51666     | ASB4         | ankyrin repeat and SOCS box containing 4                                                |
| 50940     | PDE11A       | phosphodiesterase 11A                                                                   |
| 91750     | LIN52        | lin-52 homolog (C. elegans)                                                             |
| 79870     | BAALC        | brain and acute leukemia, cytoplasmic                                                   |
| 1307      | COL16A1      | collagen, type XVI, alpha 1                                                             |
| 100128296 | [No Symbol]  | [No Name]                                                                               |
| 260341    | TFAMP1       | transcription factor A, mitochondrial pseudogene 1                                      |
| 150554    | LOC150554    | tyrosine 3-monooxygenase/tryptophan 5-monooxygenase activation protein, zeta pseudogene |
| 161       | AP2A2        | adaptor-related protein complex 2, alpha 2 subunit                                      |
| 8326      | FZD9         | frizzled family receptor 9                                                              |
| 6251      | RSU1         | Ras suppressor protein 1                                                                |
| 56246     | MRAP         | melanocortin 2 receptor accessory protein                                               |
| 10361     | NPM2         | nucleophosmin/nucleoplasm 2                                                             |
| 10625     | IVNS1ABP     | influenza virus NS1A binding protein                                                    |
| 90293     | KLHL13       | kelch-like 13 (Drosophila)                                                              |
| 123099    | DEGS2        | degenerative spermatocyte homolog 2, lipid desaturase (Drosophila)                      |

|           |             |                                                                                             |
|-----------|-------------|---------------------------------------------------------------------------------------------|
| 266954    | CABYRP1     | calcium binding tyrosine-(Y)-phosphorylation regulated pseudogene 1                         |
| 3897      | L1CAM       | L1 cell adhesion molecule                                                                   |
| 718       | C3          | complement component 3                                                                      |
| 390301    | ST13P9      | suppression of tumorigenicity 13 (colon carcinoma) (Hsp70 interacting protein) pseudogene 9 |
| 107       | ADCY1       | adenylate cyclase 1 (brain)                                                                 |
| 100128370 | [No Symbol] | [No Name]                                                                                   |
| 399980    | [No Symbol] | [No Name]                                                                                   |
| 6662      | SOX9        | SRY (sex determining region Y)-box 9                                                        |
| 339201    | C17orf65    | chromosome 17 open reading frame 65                                                         |
| 100131335 | [No Symbol] | [No Name]                                                                                   |
| 100131229 | RPL6P17     | ribosomal protein L6 pseudogene 17                                                          |
| 79635     | CCDC121     | coiled-coil domain containing 121                                                           |
| 347119    | LOC347119   | protein C15orf2-like                                                                        |
| 2588      | GALNS       | galactosamine (N-acetyl)-6-sulfate sulfatase                                                |
| 392617    | ELFN1       | extracellular leucine-rich repeat and fibronectin type III domain containing 1              |
| 155060    | LOC155060   | AI894139 pseudogene                                                                         |
| 56241     | SUSD2       | sushi domain containing 2                                                                   |
| 391819    | KRT18P42    | keratin 18 pseudogene 42                                                                    |
| 392485    | LOC392485   | ataxin 7-like 3 pseudogene                                                                  |
| 643797    | LOC643797   | AGVR6190                                                                                    |
| 84624     | FNDC1       | fibronectin type III domain containing 1                                                    |
| 51741     | WWOX        | WW domain containing oxidoreductase                                                         |
| 100130023 | [No Symbol] | [No Name]                                                                                   |
| 23627     | PRND        | prion protein 2 (dublet)                                                                    |
| 391538    | ALDOAP1     | aldolase A, fructose-bisphosphate pseudogene 1                                              |
| 9783      | RIMS3       | regulating synaptic membrane exocytosis 3                                                   |
| 7552      | ZNF711      | zinc finger protein 711                                                                     |
| 7500      | XGPY        | Xg pseudogene, Y-linked                                                                     |
| 285382    | C3orf70     | chromosome 3 open reading frame 70                                                          |
| 79370     | BCL2L14     | BCL2-like 14 (apoptosis facilitator)                                                        |
| 139420    | SMEK3P      | SMEK homolog 3, suppressor of mek1 (Dictyostelium) pseudogene                               |
| 6290      | SAA3P       | serum amyloid A3 pseudogene                                                                 |
| 23198     | PSME4       | proteasome (prosome, macropain) activator subunit 4                                         |
| 154215    | NKAIN2      | Na <sup>+</sup> /K <sup>+</sup> transporting ATPase interacting 2                           |
| 730198    | LOC730198   | hypothetical protein LOC730198                                                              |



|           |              |                                                                                                              |
|-----------|--------------|--------------------------------------------------------------------------------------------------------------|
| 5502      | PPP1R1A      | protein phosphatase 1, regulatory (inhibitor) subunit 1A                                                     |
| 359724    | RN18S2P      | RNA, 18S ribosomal 2, pseudogene                                                                             |
| 257019    | FRMD3        | FERM domain containing 3                                                                                     |
| 57608     | KIAA1462     | KIAA1462                                                                                                     |
| 7125      | TNNC2        | troponin C type 2 (fast)                                                                                     |
| 649873    | LOC649873    | peptidyl-prolyl cis-trans isomerase A-like                                                                   |
| 388886    | C22orf36     | chromosome 22 open reading frame 36                                                                          |
| 100131130 | HNRNPA1P13   | heterogeneous nuclear ribonucleoprotein A1 pseudogene 13                                                     |
| 1660      | DHX9         | DEAH (Asp-Glu-Ala-His) box polypeptide 9                                                                     |
| 127687    | C1orf122     | chromosome 1 open reading frame 122                                                                          |
| 441750    | LOC441750    | chromosome 12 open reading frame 49 pseudogene                                                               |
| 3358      | HTR2C        | 5-hydroxytryptamine (serotonin) receptor 2C                                                                  |
| 2672      | GFI1         | growth factor independent 1 transcription repressor                                                          |
| 646576    | LOC646576    | hypothetical LOC646576                                                                                       |
| 728361    | OVOL3        | ovo-like 3 (Drosophila)                                                                                      |
| 643114    | [No Symbol]  | [No Name]                                                                                                    |
| 3535      | IGL@         | immunoglobulin lambda locus                                                                                  |
| 140689    | CBLN4        | cerebellin 4 precursor                                                                                       |
| 100129568 | [No Symbol]  | [No Name]                                                                                                    |
| 81849     | ST6GALNAC5   | ST6 (alpha-N-acetylneuraminyl-2,3-beta-galactosyl-1,3)-N-acetylgalactosaminide alpha-2,6-sialyltransferase 5 |
| 390816    | THA1P        | threonine aldolase 1, pseudogene                                                                             |
| 9436      | NCR2         | natural cytotoxicity triggering receptor 2                                                                   |
| 79017     | GGCT         | gamma-glutamylcyclotransferase                                                                               |
| 113612    | CYP2U1       | cytochrome P450, family 2, subfamily U, polypeptide 1                                                        |
| 54905     | CYP2W1       | cytochrome P450, family 2, subfamily W, polypeptide 1                                                        |
| 26057     | ANKRD17      | ankyrin repeat domain 17                                                                                     |
| 65263     | PYCRL        | pyrroline-5-carboxylate reductase-like                                                                       |
| 54932     | EXD3         | exonuclease 3'-5' domain containing 3                                                                        |
| 497258    | BDNF-AS1     | BDNF antisense RNA 1 (non-protein coding)                                                                    |
| 23705     | CADM1        | cell adhesion molecule 1                                                                                     |
| 51112     | TTC15        | tetratricopeptide repeat domain 15                                                                           |
| 23367     | LARP1        | La ribonucleoprotein domain family, member 1                                                                 |
| 53411     | ATP5LP1      | ATP synthase, H <sup>+</sup> transporting, mitochondrial Fo complex, subunit g, pseudogene 1                 |
| 391183    | RSL24D1P4    | ribosomal L24 domain containing 1 pseudogene 4                                                               |
| 100129640 | LOC100129640 | DEAD (Asp-Glu-Ala-Asp) box polypeptide 55 pseudogene                                                         |

|           |             |                                                                           |
|-----------|-------------|---------------------------------------------------------------------------|
| 10590     | SCGN        | secretagogin, EF-hand calcium binding protein                             |
| 3381      | IBSP        | integrin-binding sialoprotein                                             |
| 6865      | TACR2       | tachykinin receptor 2                                                     |
| 64766     | S100PBP     | S100P binding protein                                                     |
| 130075    | OR9A4       | olfactory receptor, family 9, subfamily A, member 4                       |
| 392490    | FLJ44635    | TPT1-like protein                                                         |
| 203413    | CXorf61     | chromosome X open reading frame 61                                        |
| 140876    | FAM65C      | family with sequence similarity 65, member C                              |
| 6426      | SRSF1       | serine/arginine-rich splicing factor 1                                    |
| 23284     | LPHN3       | latrophilin 3                                                             |
| 1269      | CNR2        | cannabinoid receptor 2 (macrophage)                                       |
| 5172      | SLC26A4     | solute carrier family 26, member 4                                        |
| 8973      | CHRNA6      | cholinergic receptor, nicotinic, alpha 6                                  |
| 8572      | PDLIM4      | PDZ and LIM domain 4                                                      |
| 100133156 | [No Symbol] | [No Name]                                                                 |
| 9315      | C5orf13     | chromosome 5 open reading frame 13                                        |
| 2633      | GBP1        | guanylate binding protein 1, interferon-inducible                         |
| 7173      | TPO         | thyroid peroxidase                                                        |
| 317671    | RFESD       | Rieske (Fe-S) domain containing                                           |
| 100129015 | [No Symbol] | [No Name]                                                                 |
| 144448    | TSPAN19     | tetraspanin 19                                                            |
| 6533      | SLC6A6      | solute carrier family 6 (neurotransmitter transporter, taurine), member 6 |
| 646970    | LOC646970   | chromosome 5 open reading frame 15 pseudogene                             |
| 8601      | RGS20       | regulator of G-protein signaling 20                                       |
| 11156     | PTP4A3      | protein tyrosine phosphatase type IVA, member 3                           |
| 149281    | METTL11B    | methyltransferase like 11B                                                |
| 6733      | SRPK2       | SRSF protein kinase 2                                                     |
| 93349     | SP140L      | SP140 nuclear body protein-like                                           |
| 10829     | NPM1P18     | nucleophosmin 1 (nucleolar phosphoprotein B23, numatrin) pseudogene 18    |
| 100133117 | [No Symbol] | [No Name]                                                                 |
| 7682      | MKRN4P      | makorin ring finger protein 4, pseudogene                                 |
| 138882    | OR1N2       | olfactory receptor, family 1, subfamily N, member 2                       |
| 162989    | DEDD2       | death effector domain containing 2                                        |
| 10418     | SPON1       | spondin 1, extracellular matrix protein                                   |
| 341356    | RPL31P50    | ribosomal protein L31 pseudogene 50                                       |

|           |              |                                                                 |
|-----------|--------------|-----------------------------------------------------------------|
| 100130105 | LOC100130105 | tripartite motif-containing protein ENSP00000309378-like        |
| 439915    | KRTAP5-5     | keratin associated protein 5-5                                  |
| 283562    | RPL21P9      | ribosomal protein L21 pseudogene 9                              |
| 641515    | LOC641515    | hypothetical LOC641515                                          |
| 83903     | GSG2         | germ cell associated 2 (haspin)                                 |
| 6209      | RPS15        | ribosomal protein S15                                           |
| 9175      | MAP3K13      | mitogen-activated protein kinase kinase kinase 13               |
| 56169     | GSDMC        | gasdermin C                                                     |
| 100130206 | [No Symbol]  | [No Name]                                                       |
| 25854     | FAM149A      | family with sequence similarity 149, member A                   |
| 391051    | UOX          | urate oxidase, pseudogene                                       |
| 3295      | HSD17B4      | hydroxysteroid (17-beta) dehydrogenase 4                        |
| 320       | APBA1        | amyloid beta (A4) precursor protein-binding, family A, member 1 |
| 129522    | LOC129522    | ralA binding protein 1 pseudogene                               |
| 8387      | OR1E1        | olfactory receptor, family 1, subfamily E, member 1             |
| 219438    | OR5D18       | olfactory receptor, family 5, subfamily D, member 18            |
| 25837     | RAB26        | RAB26, member RAS oncogene family                               |
| 3041      | HBAP1        | hemoglobin, alpha pseudogene 1                                  |
| 28421     | IGHV3-52     | immunoglobulin heavy variable 3-52 (pseudogene)                 |
| 7579      | ZSCAN20      | zinc finger and SCAN domain containing 20                       |
| 26831     | RNU5A        | RNA, U5A small nuclear                                          |
| 55890     | GPRC5C       | G protein-coupled receptor, family C, group 5, member C         |
| 100129810 | [No Symbol]  | [No Name]                                                       |
| 57224     | NHSL1        | NHS-like 1                                                      |
| 100129395 | LOC100129395 | NS5ATP13TP1                                                     |
| 140870    | WFDC6        | WAP four-disulfide core domain 6                                |
| 153328    | SLC25A48     | solute carrier family 25, member 48                             |
| 100128522 | HPRTP4       | hypoxanthine phosphoribosyltransferase pseudogene 4             |
| 151887    | CCDC80       | coiled-coil domain containing 80                                |
| 51684     | SUFU         | suppressor of fused homolog (Drosophila)                        |
| 344887    | LOC344887    | NmrA-like family domain containing 1 pseudogene                 |
| 100130946 | [No Symbol]  | [No Name]                                                       |
| 100131805 | RPL6P18      | ribosomal protein L6 pseudogene 18                              |
| 114112    | TXNRD3       | thioredoxin reductase 3                                         |
| 729059    | LOC729059    | hypothetical LOC729059                                          |

|           |              |                                                                                                          |
|-----------|--------------|----------------------------------------------------------------------------------------------------------|
| 401286    | LOC401286    | hypothetical LOC401286                                                                                   |
| 83698     | CALN1        | calneuron 1                                                                                              |
| 85461     | TANC1        | tetratricopeptide repeat, ankyrin repeat and coiled-coil containing 1                                    |
| 55763     | EXOC1        | exocyst complex component 1                                                                              |
| 401677    | LOC401677    | eukaryotic translation elongation factor 1 alpha 2 pseudogene                                            |
| 5379      | PMS2P1       | postmeiotic segregation increased 2 pseudogene 1                                                         |
| 285735    | NCRNA00326   | non-protein coding RNA 326                                                                               |
| 391179    | KRT18P32     | keratin 18 pseudogene 32                                                                                 |
| 23414     | ZFPM2        | zinc finger protein, multitype 2                                                                         |
| 3737      | KCNA2        | potassium voltage-gated channel, shaker-related subfamily, member 2                                      |
| 6422      | SFRP1        | secreted frizzled-related protein 1                                                                      |
| 54492     | NEURL1B      | neuralized homolog 1B (Drosophila)                                                                       |
| 29998     | GLTSCR1      | glioma tumor suppressor candidate region gene 1                                                          |
| 10858     | CYP46A1      | cytochrome P450, family 46, subfamily A, polypeptide 1                                                   |
| 402643    | TPM3P4       | tropomyosin 3 pseudogene 4                                                                               |
| 84957     | RELT         | RELT tumor necrosis factor receptor                                                                      |
| 344371    | SLC25A5P2    | solute carrier family 25 (mitochondrial carrier; adenine nucleotide translocator), member 5 pseudogene 2 |
| 9413      | FAM189A2     | family with sequence similarity 189, member A2                                                           |
| 2046      | EPHA8        | EPH receptor A8                                                                                          |
| 51738     | GHRL         | ghrelin/obestatin prepropeptide                                                                          |
| 5396      | PRRX1        | paired related homeobox 1                                                                                |
| 100127962 | LOC100127962 | family with sequence similarity 190, member B pseudogene                                                 |
| 344462    | KRT18P39     | keratin 18 pseudogene 39                                                                                 |
| 846       | CASR         | calcium-sensing receptor                                                                                 |
| 346524    | OR2Q1P       | olfactory receptor, family 2, subfamily Q, member 1 pseudogene                                           |
| 1149      | CIDEA        | cell death-inducing DFFA-like effector a                                                                 |
| 23255     | CCDC165      | coiled-coil domain containing 165                                                                        |
| 158506    | ZNF645       | zinc finger protein 645                                                                                  |
| 4217      | MAP3K5       | mitogen-activated protein kinase kinase kinase 5                                                         |
| 4968      | OGG1         | 8-oxoguanine DNA glycosylase                                                                             |
| 23600     | AMACR        | alpha-methylacyl-CoA racemase                                                                            |
| 8651      | SOCS1        | suppressor of cytokine signaling 1                                                                       |
| 392443    | [No Symbol]  | [No Name]                                                                                                |
| 5224      | PGAM2        | phosphoglycerate mutase 2 (muscle)                                                                       |
| 165082    | GPR113       | G protein-coupled receptor 113                                                                           |

|        |           |                                                                     |
|--------|-----------|---------------------------------------------------------------------|
| 55289  | ACOXL     | acyl-CoA oxidase-like                                               |
| 83445  | GSG1      | germ cell associated 1                                              |
| 326590 | SSXP7     | SSX family pseudogene 7                                             |
| 9819   | TSC22D2   | TSC22 domain family, member 2                                       |
| 653924 | LOC653924 | glycerol-3-phosphate acyltransferase 2, mitochondrial pseudogene    |
| 5294   | PIK3CG    | phosphoinositide-3-kinase, catalytic, gamma polypeptide             |
| 202559 | KHDRBS2   | KH domain containing, RNA binding, signal transduction associated 2 |
| 644661 | LOC644661 | importin subunit alpha-2-like                                       |
| 441893 | GAPDHP29  | glyceraldehyde 3 phosphate dehydrogenase pseudogene 29              |
| 5586   | PKN2      | protein kinase N2                                                   |
| 121549 | ASCL4     | achaete-scute complex homolog 4 (Drosophila)                        |
| 401975 | RPS3AP10  | ribosomal protein S3a pseudogene 10                                 |
| 6336   | SCN10A    | sodium channel, voltage-gated, type X, alpha subunit                |
| 9635   | CLCA2     | chloride channel accessory 2                                        |
| 3617   | IMPG1     | interphotoreceptor matrix proteoglycan 1                            |
| 115584 | SLC5A11   | solute carrier family 5 (sodium/glucose cotransporter), member 11   |
| 115209 | OMA1      | OMA1 homolog, zinc metallopeptidase ( <i>S. cerevisiae</i> )        |
| 55355  | HJURP     | Holliday junction recognition protein                               |
| 2271   | FH        | fumarate hydratase                                                  |
| 51108  | METTL9    | methyltransferase like 9                                            |
| 4159   | MC3R      | melanocortin 3 receptor                                             |
| 23397  | NCAPH     | non-SMC condensin I complex, subunit H                              |
| 54967  | CXorf48   | chromosome X open reading frame 48                                  |
| 375298 | CERKL     | ceramide kinase-like                                                |
| 644651 | HMGB1P25  | high mobility group box 1 pseudogene 25                             |
| 392262 | RPSAP48   | ribosomal protein SA pseudogene 48                                  |
| 147381 | CBLN2     | cerebellin 2 precursor                                              |
| 11278  | KLF12     | Kruppel-like factor 12                                              |
| 388813 | LOC388813 | uncharacterized protein ENSP00000383407-like                        |
| 401036 | ASB18     | ankyrin repeat and SOCS box containing 18                           |
| 89870  | TRIM15    | tripartite motif containing 15                                      |
| 284366 | KLK9      | kallikrein-related peptidase 9                                      |
| 57514  | ARHGAP31  | Rho GTPase activating protein 31                                    |
| 93109  | TMEM44    | transmembrane protein 44                                            |
| 7417   | VDAC2     | voltage-dependent anion channel 2                                   |

|           |             |                                                                          |
|-----------|-------------|--------------------------------------------------------------------------|
| 54661     | PCDHB17     | protocadherin beta 17 pseudogene                                         |
| 254048    | UBN2        | ubinuclein 2                                                             |
| 285634    | LOC285634   | integrator complex subunit 6 pseudogene                                  |
| 84560     | MT4         | metallothionein 4                                                        |
| 9375      | TM9SF2      | transmembrane 9 superfamily member 2                                     |
| 389180    | 5-HT3C2     | 5-HT3c2 serotonin receptor-like protein pseudogene                       |
| 27252     | KLHL20      | kelch-like 20 (Drosophila)                                               |
| 155061    | ZNF746      | zinc finger protein 746                                                  |
| 7873      | MANF        | mesencephalic astrocyte-derived neurotrophic factor                      |
| 390937    | LOC390937   | Ets2 repressor factor-like                                               |
| 6563      | SLC14A1     | solute carrier family 14 (urea transporter), member 1 (Kidd blood group) |
| 131368    | ZPLD1       | zona pellucida-like domain containing 1                                  |
| 3232      | HOXD3       | homeobox D3                                                              |
| 79026     | AHNAK       | AHNAK nucleoprotein                                                      |
| 79065     | ATG9A       | ATG9 autophagy related 9 homolog A ( <i>S. cerevisiae</i> )              |
| 389765    | LOC389765   | kinesin family member 27 pseudogene                                      |
| 129642    | MBOAT2      | membrane bound O-acyltransferase domain containing 2                     |
| 56158     | TEX12       | testis expressed 12                                                      |
| 644739    | WASF4P      | WAS protein family, member 4, pseudogene                                 |
| 728947    | LOC728947   | zinc finger protein 680 pseudogene                                       |
| 4353      | MPO         | myeloperoxidase                                                          |
| 286102    | TMED10P1    | transmembrane emp24-like trafficking protein 10 (yeast) pseudogene 1     |
| 728148    | [No Symbol] | [No Name]                                                                |
| 390649    | OR4F15      | olfactory receptor, family 4, subfamily F, member 15                     |
| 1187      | CLCNKA      | chloride channel Ka                                                      |
| 134       | ADORA1      | adenosine A1 receptor                                                    |
| 729696    | LOC729696   | hypothetical protein LOC729696                                           |
| 340390    | KIAA1875    | KIAA1875                                                                 |
| 51725     | FBXO40      | F-box protein 40                                                         |
| 10620     | ARID3B      | AT rich interactive domain 3B (BRIGHT-like)                              |
| 2880      | GPX5        | glutathione peroxidase 5 (epididymal androgen-related protein)           |
| 132724    | TMPRSS11B   | transmembrane protease, serine 11B                                       |
| 79345     | OR51B2      | olfactory receptor, family 51, subfamily B, member 2                     |
| 391112    | OR6Y1       | olfactory receptor, family 6, subfamily Y, member 1                      |
| 100132953 | [No Symbol] | [No Name]                                                                |

|           |              |                                                                                               |
|-----------|--------------|-----------------------------------------------------------------------------------------------|
| 6490      | PMEL         | premelanosome protein                                                                         |
| 9628      | RGS6         | regulator of G-protein signaling 6                                                            |
| 1829      | DSG2         | desmoglein 2                                                                                  |
| 27044     | SND1         | staphylococcal nuclease and tudor domain containing 1                                         |
| 3551      | IKBKB        | inhibitor of kappa light polypeptide gene enhancer in B-cells, kinase beta                    |
| 84708     | LNK1         | ligand of numb-protein X 1                                                                    |
| 11040     | PIM2         | pim-2 oncogene                                                                                |
| 55362     | TMEM63B      | transmembrane protein 63B                                                                     |
| 287       | ANK2         | ankyrin 2, neuronal                                                                           |
| 84659     | RNASE7       | ribonuclease, RNase A family, 7                                                               |
| 25823     | TPSG1        | tryptase gamma 1                                                                              |
| 55217     | TMLHE        | trimethyllysine hydroxylase, epsilon                                                          |
| 1244      | ABCC2        | ATP-binding cassette, sub-family C (CFTR/MRP), member 2                                       |
| 387837    | CLEC12B      | C-type lectin domain family 12, member B                                                      |
| 23604     | DAPK2        | death-associated protein kinase 2                                                             |
| 345258    | LOC345258    | bridging integrator 2 pseudogene                                                              |
| 249       | ALPL         | alkaline phosphatase, liver/bone/kidney                                                       |
| 56995     | TULP4        | tubby like protein 4                                                                          |
| 55349     | CHDH         | choline dehydrogenase                                                                         |
| 100130943 | [No Symbol]  | [No Name]                                                                                     |
| 89866     | SEC16B       | SEC16 homolog B ( <i>S. cerevisiae</i> )                                                      |
| 730512    | [No Symbol]  | [No Name]                                                                                     |
| 100128822 | LOC100128822 | hypothetical LOC100128822                                                                     |
| 246135    | TAF9BP1      | TAF9B RNA polymerase II, TATA box binding protein (TBP)-associated factor, 31kDa pseudogene 1 |
| 200844    | C3orf67      | chromosome 3 open reading frame 67                                                            |
| 149473    | CCDC24       | coiled-coil domain containing 24                                                              |
| 100131236 | PCBP2P3      | poly(rC) binding protein 2 pseudogene 3                                                       |
| 23647     | ARFIP2       | ADP-ribosylation factor interacting protein 2                                                 |
| 26108     | PYGO1        | pygopus homolog 1 ( <i>Drosophila</i> )                                                       |
| 643965    | TMEM88B      | transmembrane protein 88B                                                                     |
| 127294    | MYOM3        | myomesin family, member 3                                                                     |
| 407023    | MIR299       | microRNA 299                                                                                  |
| 399881    | LOC399881    | heterogeneous nuclear ribonucleoprotein K pseudogene                                          |
| 100131441 | LOC100131441 | coiled-coil domain containing 65 pseudogene                                                   |
| 154197    | PNLDC1       | poly(A)-specific ribonuclease (PARN)-like domain containing 1                                 |

|           |              |                                                                                                |
|-----------|--------------|------------------------------------------------------------------------------------------------|
| 100128914 | LOC100128914 | hypothetical LOC100128914                                                                      |
| 92235     | DUSP27       | dual specificity phosphatase 27 (putative)                                                     |
| 3651      | PDX1         | pancreatic and duodenal homeobox 1                                                             |
| 646730    | LOC646730    | hypothetical protein LOC646730                                                                 |
| 100131193 | LOC100131193 | hypothetical LOC100131193                                                                      |
| 9159      | PCSK7        | proprotein convertase subtilisin/kexin type 7                                                  |
| 112817    | HOGA1        | 4-hydroxy-2-oxoglutarate aldolase 1                                                            |
| 11082     | ESM1         | endothelial cell-specific molecule 1                                                           |
| 6996      | TDG          | thymine-DNA glycosylase                                                                        |
| 5949      | RBP3         | retinol binding protein 3, interstitial                                                        |
| 169841    | ZNF169       | zinc finger protein 169                                                                        |
| 391472    | LOC391472    | bicaudal D homolog 1 (Drosophila) pseudogene                                                   |
| 57521     | RPTOR        | regulatory associated protein of MTOR, complex 1                                               |
| 10231     | RCAN2        | regulator of calcineurin 2                                                                     |
| 1264      | CNN1         | calponin 1, basic, smooth muscle                                                               |
| 2798      | GNRHR        | gonadotropin-releasing hormone receptor                                                        |
| 8613      | PPAP2B       | phosphatidic acid phosphatase type 2B                                                          |
| 55068     | ENOX1        | ecto-NOX disulfide-thiol exchanger 1                                                           |
| 388948    | LOC388948    | hypothetical LOC388948                                                                         |
| 54016     | TUBAP        | tubulin, alpha pseudogene                                                                      |
| 80206     | FHOD3        | formin homology 2 domain containing 3                                                          |
| 1501      | CTNND2       | catenin (cadherin-associated protein), delta 2 (neural plakophilin-related arm-repeat protein) |
| 220786    | CDK7PS       | cyclin-dependent kinase 7 pseudogene                                                           |
| 100129517 | RPL26P23     | ribosomal protein L26 pseudogene 23                                                            |
| 222068    | TMED4        | transmembrane emp24 protein transport domain containing 4                                      |
| 1979      | EIF4EBP2     | eukaryotic translation initiation factor 4E binding protein 2                                  |
| 91942     | NDUFAF2      | NADH dehydrogenase (ubiquinone) 1 alpha subcomplex, assembly factor 2                          |
| 2358      | FPR2         | formyl peptide receptor 2                                                                      |
| 1890      | TYMP         | thymidine phosphorylase                                                                        |
| 91748     | C14orf43     | chromosome 14 open reading frame 43                                                            |
| 8864      | PER2         | period homolog 2 (Drosophila)                                                                  |
| 4908      | NTF3         | neurotrophin 3                                                                                 |
| 64284     | RAB17        | RAB17, member RAS oncogene family                                                              |
| 4486      | MST1R        | macrophage stimulating 1 receptor (c-met-related tyrosine kinase)                              |
| 158401    | C9orf84      | chromosome 9 open reading frame 84                                                             |



|           |              |                                                                                                                          |
|-----------|--------------|--------------------------------------------------------------------------------------------------------------------------|
| 374470    | C12orf42     | chromosome 12 open reading frame 42                                                                                      |
| 128822    | CST9         | cystatin 9 (testatin)                                                                                                    |
| 116113    | FOXP4        | forkhead box P4                                                                                                          |
| 146439    | CCDC64B      | coiled-coil domain containing 64B                                                                                        |
| 100130123 | [No Symbol]  | [No Name]                                                                                                                |
| 26701     | OR2N1P       | olfactory receptor, family 2, subfamily N, member 1 pseudogene                                                           |
| 115019    | SLC26A9      | solute carrier family 26, member 9                                                                                       |
| 2206      | MS4A2        | membrane-spanning 4-domains, subfamily A, member 2 (Fc fragment of IgE, high affinity I, receptor for; beta polypeptide) |
| 390403    | LOC390403    | chromosome 9 open reading frame 6 pseudogene                                                                             |
| 441151    | TMEM151B     | transmembrane protein 151B                                                                                               |
| 100132796 | LOC100132796 | MKI67 (FHA domain) interacting nucleolar phosphoprotein pseudogene                                                       |
| 79258     | MMEL1        | membrane metallo-endopeptidase-like 1                                                                                    |
| 7410      | VAV2         | vav 2 guanine nucleotide exchange factor                                                                                 |
| 8587      | OR7E2P       | olfactory receptor, family 7, subfamily E, member 2 pseudogene                                                           |
| 4436      | MSH2         | mutS homolog 2, colon cancer, nonpolyposis type 1 (E. coli)                                                              |
| 7142      | TNP2         | transition protein 2 (during histone to protamine replacement)                                                           |
| 400796    | [No Symbol]  | [No Name]                                                                                                                |
| 392456    | LOC392456    | catenin, beta like 1 pseudogene                                                                                          |
| 81340     | OR10Y1P      | olfactory receptor, family 10, subfamily Y, member 1 pseudogene                                                          |
| 285513    | GPRIN3       | GPRIN family member 3                                                                                                    |
| 26211     | OR2F1        | olfactory receptor, family 2, subfamily F, member 1                                                                      |
| 728376    | LOC728376    | zinc finger protein pseudogene                                                                                           |
| 84690     | SPATA22      | spermatogenesis associated 22                                                                                            |
| 133150    | SULT1D1P     | sulfotransferase family, cytosolic, 1D, member 1, pseudogene                                                             |
| 23504     | RIMBP2       | RIMS binding protein 2                                                                                                   |
| 10905     | MAN1A2       | mannosidase, alpha, class 1A, member 2                                                                                   |
| 100128988 | LOC100128988 | hypothetical LOC100128988                                                                                                |
| 349391    | CYCSP44      | cytochrome c, somatic pseudogene 44                                                                                      |
| 389144    | OR7E130P     | olfactory receptor, family 7, subfamily E, member 130 pseudogene                                                         |
| 54715     | RBFOX1       | RNA binding protein, fox-1 homolog (C. elegans) 1                                                                        |
| 339168    | TMEM95       | transmembrane protein 95                                                                                                 |
| 55786     | ZNF415       | zinc finger protein 415                                                                                                  |
| 642006    | LOC642006    | glucuronidase, beta pseudogene                                                                                           |
| 55161     | TMEM33       | transmembrane protein 33                                                                                                 |
| 339906    | PRSS42       | protease, serine, 42                                                                                                     |

|           |              |                                                                                                |
|-----------|--------------|------------------------------------------------------------------------------------------------|
| 386690    | OFD1P6Y      | OFD1 pseudogene 6, Y-linked                                                                    |
| 2649      | NR6A1        | nuclear receptor subfamily 6, group A, member 1                                                |
| 26507     | CNNM1        | cyclin M1                                                                                      |
| 4017      | LOXL2        | lysyl oxidase-like 2                                                                           |
| 114787    | GPRIN1       | G protein regulated inducer of neurite outgrowth 1                                             |
| 577       | BAI3         | brain-specific angiogenesis inhibitor 3                                                        |
| 84722     | PSRC1        | proline/serine-rich coiled-coil 1                                                              |
| 51809     | GALNT7       | UDP-N-acetyl-alpha-D-galactosamine:polypeptide N-acetylgalactosaminyltransferase 7 (GalNAc-T7) |
| 390101    | LOC390101    | mas-related G-protein coupled receptor member X3-like                                          |
| 6517      | SLC2A4       | solute carrier family 2 (facilitated glucose transporter), member 4                            |
| 342184    | FMN1         | formin 1                                                                                       |
| 58157     | NGB          | neuroglobin                                                                                    |
| 2705      | GJB1         | gap junction protein, beta 1, 32kDa                                                            |
| 729       | C6           | complement component 6                                                                         |
| 145447    | ABHD12B      | abhydrolase domain containing 12B                                                              |
| 8787      | RGS9         | regulator of G-protein signaling 9                                                             |
| 100130336 | [No Symbol]  | [No Name]                                                                                      |
| 79698     | ZMAT4        | zinc finger, matrin-type 4                                                                     |
| 10447     | FAM3C        | family with sequence similarity 3, member C                                                    |
| 85479     | DNAJC5B      | DnaJ (Hsp40) homolog, subfamily C, member 5 beta                                               |
| 5607      | MAP2K5       | mitogen-activated protein kinase kinase 5                                                      |
| 100130490 | LOC100130490 | tumor protein p63 regulated 1-like pseudogene                                                  |
| 100133169 | [No Symbol]  | [No Name]                                                                                      |
| 5194      | PEX13        | peroxisomal biogenesis factor 13                                                               |
| 284422    | C19orf77     | chromosome 19 open reading frame 77                                                            |
| 71        | ACTG1        | actin, gamma 1                                                                                 |
| 7399      | USH2A        | Usher syndrome 2A (autosomal recessive, mild)                                                  |
| 2852      | GPER         | G protein-coupled estrogen receptor 1                                                          |
| 197003    | MGC15885     | hypothetical protein MGC15885                                                                  |
| 643884    | LOC643884    | suppressor of cytokine signaling 5 pseudogene                                                  |
| 64844     | 7-Mar        | membrane-associated ring finger (C3HC4) 7                                                      |
| 6323      | SCN1A        | sodium channel, voltage-gated, type I, alpha subunit                                           |
| 1138      | CHRNA5       | cholinergic receptor, nicotinic, alpha 5                                                       |
| 642741    | RPL3P7       | ribosomal protein L3 pseudogene 7                                                              |
| 118491    | TTC18        | tetratricopeptide repeat domain 18                                                             |

|           |              |                                                                          |
|-----------|--------------|--------------------------------------------------------------------------|
| 100129090 | RPS5P4       | ribosomal protein S5 pseudogene 4                                        |
| 408029    | C2orf27B     | chromosome 2 open reading frame 27B                                      |
| 6581      | SLC22A3      | solute carrier family 22 (extraneuronal monoamine transporter), member 3 |
| 641367    | LOC641367    | cyclin Y-like pseudogene                                                 |
| 145200    | NCRNA00239   | non-protein coding RNA 239                                               |
| 389123    | IQCF2        | IQ motif containing F2                                                   |
| 283193    | OR5AZ1P      | olfactory receptor, family 5, subfamily AZ, member 1 pseudogene          |
| 1400      | CRMP1        | collapsin response mediator protein 1                                    |
| 375612    | LHFPL3       | lipoma HMGIC fusion partner-like 3                                       |
| 9312      | KCNB2        | potassium voltage-gated channel, Shab-related subfamily, member 2        |
| 57707     | KIAA1609     | KIAA1609                                                                 |
| 2547      | XRCC6        | X-ray repair complementing defective repair in Chinese hamster cells 6   |
| 138240    | C9orf57      | chromosome 9 open reading frame 57                                       |
| 130700    | PSMB3P2      | proteasome (prosome, macropain) subunit, beta type, 3 pseudogene 2       |
| 23478     | SEC11A       | SEC11 homolog A ( <i>S. cerevisiae</i> )                                 |
| 124152    | IQCK         | IQ motif containing K                                                    |
| 100129130 | LOC100129130 | THO complex 4 pseudogene                                                 |
| 645687    | C14orf34     | chromosome 14 open reading frame 34                                      |
| 26973     | CHORDC1      | cysteine and histidine-rich domain (CHORD) containing 1                  |
| 646480    | FABP9        | fatty acid binding protein 9, testis                                     |
| 390894    | OR7A2P       | olfactory receptor, family 7, subfamily A, member 2 pseudogene           |
| 7419      | VDAC3        | voltage-dependent anion channel 3                                        |
| 440419    | LOC440419    | TBC1 domain family, member 3H pseudogene                                 |
| 11083     | DIDO1        | death inducer-obliterator 1                                              |
| 57545     | CC2D2A       | coiled-coil and C2 domain containing 2A                                  |
| 57217     | TTC7A        | tetratricopeptide repeat domain 7A                                       |
| 55869     | HDAC8        | histone deacetylase 8                                                    |
| 1281      | COL3A1       | collagen, type III, alpha 1                                              |
| 79961     | DENND2D      | DENN/MADD domain containing 2D                                           |
| 57491     | AHRR         | aryl-hydrocarbon receptor repressor                                      |
| 79908     | BTNL8        | butyrophilin-like 8                                                      |
| 6238      | RRBP1        | ribosome binding protein 1 homolog 180kDa (dog)                          |
| 100129936 | LOC100129936 | hypothetical LOC100129936                                                |
| 10647     | SCGB1D2      | secretoglobin, family 1D, member 2                                       |
| 1180      | CLCN1        | chloride channel 1, skeletal muscle                                      |

|           |              |                                                                                                        |
|-----------|--------------|--------------------------------------------------------------------------------------------------------|
| 255239    | ANKK1        | ankyrin repeat and kinase domain containing 1                                                          |
| 151534    | LOC151534    | hypothetical LOC151534                                                                                 |
| 219771    | CCNY         | cyclin Y                                                                                               |
| 729545    | LOC729545    | WBSCR19-like protein 5-like                                                                            |
| 401646    | LOC401646    | guanine nucleotide-binding protein G(i) subunit alpha-2-like                                           |
| 128344    | C1orf88      | chromosome 1 open reading frame 88                                                                     |
| 57449     | PLEKHG5      | pleckstrin homology domain containing, family G (with RhoGef domain) member 5                          |
| 135112    | NCOA7        | nuclear receptor coactivator 7                                                                         |
| 7851      | MALL         | mal, T-cell differentiation protein-like                                                               |
| 2695      | GIP          | gastric inhibitory polypeptide                                                                         |
| 124871    | FLJ40194     | hypothetical FLJ40194                                                                                  |
| 54751     | FBLIM1       | filamin binding LIM protein 1                                                                          |
| 92345     | NAF1         | nuclear assembly factor 1 homolog ( <i>S. cerevisiae</i> )                                             |
| 100130373 | LOC100130373 | hypothetical LOC100130373                                                                              |
| 4826      | NNAT         | neuronatin                                                                                             |
| 79827     | CLMP         | CXADR-like membrane protein                                                                            |
| 7784      | ZP3          | zona pellucida glycoprotein 3 (sperm receptor)                                                         |
| 79315     | OR7E91P      | olfactory receptor, family 7, subfamily E, member 91 pseudogene                                        |
| 91653     | BOC          | Boc homolog (mouse)                                                                                    |
| 4301      | MLLT4        | myeloid/lymphoid or mixed-lineage leukemia (trithorax homolog, <i>Drosophila</i> ); translocated to, 4 |
| 205272    | CNN2P8       | calponin 2 pseudogene 8                                                                                |
| 390988    | [No Symbol]  | [No Name]                                                                                              |
| 118812    | MORN4        | MORN repeat containing 4                                                                               |
| 25875     | LETMD1       | LETM1 domain containing 1                                                                              |
| 647123    | UQCRCF5P2    | ubiquinol-cytochrome c reductase, Rieske iron-sulfur polypeptide 1 pseudogene 2                        |
| 10113     | PREB         | prolactin regulatory element binding                                                                   |
| 55698     | RADIL        | Ras association and DIL domains                                                                        |
| 27075     | TSPAN13      | tetraspanin 13                                                                                         |
| 26245     | OR2M4        | olfactory receptor, family 2, subfamily M, member 4                                                    |
| 10379     | IRF9         | interferon regulatory factor 9                                                                         |
| 8694      | DGAT1        | diacylglycerol O-acyltransferase 1                                                                     |
| 100132621 | LOC100132621 | family with sequence similarity 54, member A pseudogene                                                |
| 5105      | PCK1         | phosphoenolpyruvate carboxykinase 1 (soluble)                                                          |
| 441054    | C4orf47      | chromosome 4 open reading frame 47                                                                     |
| 441907    | LOC441907    | ribosomal protein L6 pseudogene                                                                        |

|           |              |                                                                      |
|-----------|--------------|----------------------------------------------------------------------|
| 5225      | PGC          | progastricsin (pepsinogen C)                                         |
| 139189    | DGKK         | diacylglycerol kinase, kappa                                         |
| 59269     | HIVEP3       | human immunodeficiency virus type I enhancer binding protein 3       |
| 643031    | LOC643031    | mitochondrially encoded NADH dehydrogenase 5 pseudogene              |
| 8418      | CMAHP        | cytidine monophospho-N-acetylneuraminic acid hydroxylase, pseudogene |
| 83878     | USHBP1       | Usher syndrome 1C binding protein 1                                  |
| 49860     | CRNN         | cornulin                                                             |
| 240       | ALOX5        | arachidonate 5-lipoxygenase                                          |
| 353006    | HCG2P6       | HLA complex group 2 pseudogene 6                                     |
| 79930     | DOK3         | docking protein 3                                                    |
| 728191    | [No Symbol]  | [No Name]                                                            |
| 57477     | SHROOM4      | shroom family member 4                                               |
| 100128588 | LOC100128588 | PIN2/TERF1 interacting, telomerase inhibitor 1 pseudogene            |
| 55117     | SLC6A15      | solute carrier family 6 (neutral amino acid transporter), member 15  |
| 79925     | SPEF2        | sperm flagellar 2                                                    |
| 774       | CACNA1B      | calcium channel, voltage-dependent, N type, alpha 1B subunit         |
| 401260    | FLJ41649     | hypothetical LOC401260                                               |
| 149233    | IL23R        | interleukin 23 receptor                                              |
| 27089     | UQCRCQ       | ubiquinol-cytochrome c reductase, complex III subunit VII, 9.5kDa    |
| 494143    | CHAC2        | ChaC, cation transport regulator homolog 2 (E. coli)                 |
| 4323      | MMP14        | matrix metalloproteinase 14 (membrane-inserted)                      |
| 400943    | LOC400943    | hypothetical LOC400943                                               |
| 55222     | LRRC20       | leucine rich repeat containing 20                                    |
| 79805     | VASH2        | vasohibin 2                                                          |
| 6770      | STAR         | steroidogenic acute regulatory protein                               |
| 729650    | METTL15P3    | methyltransferase like 15 pseudogene 3                               |
| 4072      | EPCAM        | epithelial cell adhesion molecule                                    |
| 85349     | KRT121P      | keratin 121 pseudogene                                               |
| 158809    | MAGEB6       | melanoma antigen family B, 6                                         |
| 100133311 | LOC100133311 | hypothetical LOC100133311                                            |
| 100128051 | [No Symbol]  | [No Name]                                                            |
| 9547      | CXCL14       | chemokine (C-X-C motif) ligand 14                                    |
| 84517     | ARPM1        | actin related protein M1                                             |
| 53842     | CLDN22       | claudin 22                                                           |
| 5697      | PYY          | peptide YY                                                           |

|           |              |                                                                                                                       |
|-----------|--------------|-----------------------------------------------------------------------------------------------------------------------|
| 553       | AVPR1B       | arginine vasopressin receptor 1B                                                                                      |
| 100133208 | [No Symbol]  | [No Name]                                                                                                             |
| 100128546 | LOC100128546 | glutaredoxin 5 pseudogene                                                                                             |
| 214       | ALCAM        | activated leukocyte cell adhesion molecule                                                                            |
| 100128987 | LOC100128987 | hypothetical LOC100128987                                                                                             |
| 55259     | CASC1        | cancer susceptibility candidate 1                                                                                     |
| 114786    | XKR4         | XK, Kell blood group complex subunit-related family, member 4                                                         |
| 9206      | RAD17P2      | RAD17 homolog ( <i>S. pombe</i> ) pseudogene 2                                                                        |
| 643911    | CRNDE        | colorectal neoplasia differentially expressed (non-protein coding)                                                    |
| 90203     | SNX21        | sorting nexin family member 21                                                                                        |
| 10181     | RBM5         | RNA binding motif protein 5                                                                                           |
| 84279     | PRADC1       | protease-associated domain containing 1                                                                               |
| 8993      | PGLYRP1      | peptidoglycan recognition protein 1                                                                                   |
| 26740     | OR1J2        | olfactory receptor, family 1, subfamily J, member 2                                                                   |
| 83873     | GPR61        | G protein-coupled receptor 61                                                                                         |
| 729894    | ELMO2P1      | engulfment and cell motility 2 pseudogene 1                                                                           |
| 5205      | ATP8B1       | ATPase, aminophospholipid transporter, class I, type 8B, member 1                                                     |
| 54700     | RRN3         | RRN3 RNA polymerase I transcription factor homolog ( <i>S. cerevisiae</i> )                                           |
| 5730      | PTGDS        | prostaglandin D2 synthase 21kDa (brain)                                                                               |
| 9846      | GAB2         | GRB2-associated binding protein 2                                                                                     |
| 147872    | CCDC155      | coiled-coil domain containing 155                                                                                     |
| 1282      | COL4A1       | collagen, type IV, alpha 1                                                                                            |
| 79838     | TMC5         | transmembrane channel-like 5                                                                                          |
| 4327      | MMP19        | matrix metalloproteinase 19                                                                                           |
| 728250    | [No Symbol]  | [No Name]                                                                                                             |
| 401021    | LOC401021    | hypothetical LOC401021                                                                                                |
| 375061    | FAM89A       | family with sequence similarity 89, member A                                                                          |
| 400026    | LOC400026    | protein-kinase, interferon-inducible double stranded RNA dependent inhibitor, repressor of (P58 repressor) pseudogene |
| 50853     | VILL         | villin-like                                                                                                           |
| 3382      | ICA1         | islet cell autoantigen 1, 69kDa                                                                                       |
| 100128043 | LOC100128043 | Fas associated factor family member 2 pseudogene                                                                      |
| 2104      | ESRRG        | estrogen-related receptor gamma                                                                                       |
| 56000     | NXF3         | nuclear RNA export factor 3                                                                                           |
| 100128834 | LOC100128834 | CDC-like kinase 3 pseudogene                                                                                          |
| 1491      | CTH          | cystathionase (cystathionine gamma-lyase)                                                                             |

|           |              |                                                                         |
|-----------|--------------|-------------------------------------------------------------------------|
| 123041    | SLC24A4      | solute carrier family 24 (sodium/potassium/calcium exchanger), member 4 |
| 960       | CD44         | CD44 molecule (Indian blood group)                                      |
| 8910      | SGCE         | sarcoglycan, epsilon                                                    |
| 284836    | NCRNA00319   | non-protein coding RNA 319                                              |
| 392221    | CHCHD2P10    | coiled-coil-helix-coiled-coil-helix domain containing 2 pseudogene 10   |
| 57575     | PCDH10       | protocadherin 10                                                        |
| 25833     | POU2F3       | POU class 2 homeobox 3                                                  |
| 100130353 | LOC100130353 | hippocampus abundant transcript-like 1 pseudogene                       |
| 285313    | IGSF10       | immunoglobulin superfamily, member 10                                   |
| 100130666 | [No Symbol]  | [No Name]                                                               |
| 5132      | PDC          | phosducin                                                               |
| 642487    | LOC642487    | H1 histone family, member O, oocyte-specific pseudogene                 |
| 386653    | IL31         | interleukin 31                                                          |
| 169026    | SLC30A8      | solute carrier family 30 (zinc transporter), member 8                   |
| 284680    | C1orf111     | chromosome 1 open reading frame 111                                     |
| 10926     | DBF4         | DBF4 homolog ( <i>S. cerevisiae</i> )                                   |
| 51455     | REV1         | REV1 homolog ( <i>S. cerevisiae</i> )                                   |
| 221301    | FAM26D       | family with sequence similarity 26, member D                            |
| 388591    | RNF207       | ring finger protein 207                                                 |
| 55770     | EXOC2        | exocyst complex component 2                                             |
| 9265      | CYTH3        | cytohesin 3                                                             |
| 284325    | C19orf54     | chromosome 19 open reading frame 54                                     |
| 79906     | MORN1        | MORN repeat containing 1                                                |
| 1179      | CLCA1        | chloride channel accessory 1                                            |
| 11211     | FZD10        | frizzled family receptor 10                                             |
| 83729     | INHBE        | inhibin, beta E                                                         |
| 63976     | PRDM16       | PR domain containing 16                                                 |
| 5307      | PITX1        | paired-like homeodomain 1                                               |
| 9369      | NRXN3        | neurexin 3                                                              |
| 59351     | PBOV1        | prostate and breast cancer overexpressed 1                              |
| 9626      | GUCA1C       | guanylate cyclase activator 1C                                          |
| 51555     | PEX5L        | peroxisomal biogenesis factor 5-like                                    |
| 140836    | BANF2        | barrier to autointegration factor 2                                     |
| 387893    | SETD8        | SET domain containing (lysine methyltransferase) 8                      |
| 100130405 | HMGB3P26     | high mobility group box 3 pseudogene 26                                 |

|           |             |                                                                                              |
|-----------|-------------|----------------------------------------------------------------------------------------------|
| 83594     | NUDT12      | nudix (nucleoside diphosphate linked moiety X)-type motif 12                                 |
| 643718    | [No Symbol] | [No Name]                                                                                    |
| 6792      | CDKL5       | cyclin-dependent kinase-like 5                                                               |
| 84536     | C21orf67    | chromosome 21 open reading frame 67                                                          |
| 255101    | CCDC108     | coiled-coil domain containing 108                                                            |
| 7005      | TEAD3       | TEA domain family member 3                                                                   |
| 100128995 | [No Symbol] | [No Name]                                                                                    |
| 136853    | SRCRB4D     | scavenger receptor cysteine rich domain containing, group B (4 domains)                      |
| 9931      | HELZ        | helicase with zinc finger                                                                    |
| 286023    | FLJ40288    | hypothetical FLJ40288                                                                        |
| 474345    | GIMAP3P     | GTPase, IMAP family member 3 pseudogene                                                      |
| 642818    | ST13P21     | suppression of tumorigenicity 13 (colon carcinoma) (Hsp70 interacting protein) pseudogene 21 |
| 387103    | CENPW       | centromere protein W                                                                         |
| 56907     | SPIRE1      | spire homolog 1 (Drosophila)                                                                 |
| 286046    | XKR6        | XK, Kell blood group complex subunit-related family, member 6                                |
| 10205     | MPZL2       | myelin protein zero-like 2                                                                   |
| 642614    | LOC642614   | chromosome 2 open reading frame 69 pseudogene                                                |
| 83869     | TTY14       | testis-specific transcript, Y-linked 14 (non-protein coding)                                 |
| 339768    | ESPNL       | espin-like                                                                                   |
| 255762    | PDZD9       | PDZ domain containing 9                                                                      |
| 23194     | FBXL7       | F-box and leucine-rich repeat protein 7                                                      |
| 27112     | FAM155B     | family with sequence similarity 155, member B                                                |
| 1144      | CHRND       | cholinergic receptor, nicotinic, delta                                                       |
| 3679      | ITGA7       | integrin, alpha 7                                                                            |
| 113675    | SDSL        | serine dehydratase-like                                                                      |
| 58155     | PTBP2       | polypyrimidine tract binding protein 2                                                       |
| 148979    | GLIS1       | GLIS family zinc finger 1                                                                    |
| 152877    | FAM53A      | family with sequence similarity 53, member A                                                 |
| 1294      | COL7A1      | collagen, type VII, alpha 1                                                                  |
| 100129405 | MSTO2P      | misato homolog 2 pseudogene                                                                  |
| 339766    | HEATR7B1    | HEAT repeat containing 7B1                                                                   |
| 4782      | NFIC        | nuclear factor I/C (CCAAT-binding transcription factor)                                      |
| 3161      | HMMR        | hyaluronan-mediated motility receptor (RHAMM)                                                |
| 317775    | CHORDC2P    | cysteine and histidine-rich domain (CHORD) containing 2 pseudogene                           |
| 391657    | LOC391657   | dipeptidyl-peptidase 3 pseudogene                                                            |



|           |              |                                                                                              |
|-----------|--------------|----------------------------------------------------------------------------------------------|
| 26508     | HEYL         | hairy/enhancer-of-split related with YRPW motif-like                                         |
| 145837    | LOC145837    | hypothetical LOC145837                                                                       |
| 100128705 | AK4P4        | adenylate kinase 4 pseudogene 4                                                              |
| 2819      | GPD1         | glycerol-3-phosphate dehydrogenase 1 (soluble)                                               |
| 23247     | KIAA0556     | KIAA0556                                                                                     |
| 83447     | SLC25A31     | solute carrier family 25 (mitochondrial carrier; adenine nucleotide translocator), member 31 |
| 100126531 | TRNAG-GCC    | transfer RNA glycine (anticodon GCC)                                                         |
| 100130090 | LOC100130090 | chromosome 10 open reading frame 78 pseudogene                                               |
| 25943     | C20orf194    | chromosome 20 open reading frame 194                                                         |
| 100133019 | [No Symbol]  | [No Name]                                                                                    |
| 2779      | GNAT1        | guanine nucleotide binding protein (G protein), alpha transducing activity polypeptide 1     |
| 100128434 | [No Symbol]  | [No Name]                                                                                    |
| 83543     | AIF1L        | allograft inflammatory factor 1-like                                                         |
| 1286      | COL4A4       | collagen, type IV, alpha 4                                                                   |
| 374407    | DNAJB13      | DnaJ (Hsp40) homolog, subfamily B, member 13                                                 |
| 54959     | ODAM         | odontogenic, ameloblast associated                                                           |
| 80108     | ZFP2         | zinc finger protein 2 homolog (mouse)                                                        |
| 400682    | LOC400682    | zinc finger protein 100-like                                                                 |
| 100131656 | LOC100131656 | syndecan binding protein (syntenin) pseudogene                                               |
| 80705     | TSGA10       | testis specific, 10                                                                          |
| 116085    | SLC22A12     | solute carrier family 22 (organic anion/urate transporter), member 12                        |
| 5446      | PON3         | paraoxonase 3                                                                                |
| 29942     | PURG         | purine-rich element binding protein G                                                        |
| 646813    | LOC646813    | DEAH (Asp-Glu-Ala-His) box polypeptide 9 pseudogene                                          |
| 389610    | XKR5         | XK, Kell blood group complex subunit-related family, member 5                                |
| 645840    | TXNRD3NB     | thioredoxin reductase 3 neighbor                                                             |
| 406984    | MIR200B      | microRNA 200b                                                                                |
| 440706    | [No Symbol]  | [No Name]                                                                                    |
| 55930     | MYO5C        | myosin VC                                                                                    |
| 79776     | ZFHX4        | zinc finger homeobox 4                                                                       |
| 100128725 | LOC100128725 | apolipoprotein O pseudogene                                                                  |
| 5671      | PSG3         | pregnancy specific beta-1-glycoprotein 3                                                     |
| 89872     | AQP10        | aquaporin 10                                                                                 |
| 460       | ASTN1        | astrotactin 1                                                                                |
| 28337     | IGHVIV-44-1  | immunoglobulin heavy variable (IV)-44-1 (pseudogene)                                         |

|           |              |                                                                             |
|-----------|--------------|-----------------------------------------------------------------------------|
| 1571      | CYP2E1       | cytochrome P450, family 2, subfamily E, polypeptide 1                       |
| 368       | ABCC6        | ATP-binding cassette, sub-family C (CFTR/MRP), member 6                     |
| 260429    | PRSS33       | protease, serine, 33                                                        |
| 100131818 | LOC100131818 | similar to hCG1644435                                                       |
| 116369    | SLC26A8      | solute carrier family 26, member 8                                          |
| 91807     | MYLK3        | myosin light chain kinase 3                                                 |
| 134548    | ANKRD43      | ankyrin repeat domain 43                                                    |
| 23349     | KIAA1045     | KIAA1045                                                                    |
| 392255    | GDF6         | growth differentiation factor 6                                             |
| 5048      | PAFAH1B1     | platelet-activating factor acetylhydrolase 1b, regulatory subunit 1 (45kDa) |
| 4828      | NMB          | neuromedin B                                                                |
| 375057    | C1orf95      | chromosome 1 open reading frame 95                                          |
| 727827    | [No Symbol]  | [No Name]                                                                   |
| 51144     | HSD17B12     | hydroxysteroid (17-beta) dehydrogenase 12                                   |
| 83468     | GLT8D2       | glycosyltransferase 8 domain containing 2                                   |
| 100128596 | LOC100128596 | NADH dehydrogenase [ubiquinone] 1 beta subcomplex subunit 9-like            |
| 11216     | AKAP10       | A kinase (PRKA) anchor protein 10                                           |
| 9721      | GPRIN2       | G protein regulated inducer of neurite outgrowth 2                          |
| 100130601 | [No Symbol]  | [No Name]                                                                   |
| 9499      | MYOT         | myotilin                                                                    |
| 26689     | OR4D1        | olfactory receptor, family 4, subfamily D, member 1                         |
| 6396      | SEC13        | SEC13 homolog ( <i>S. cerevisiae</i> )                                      |
| 6195      | RPS6KA1      | ribosomal protein S6 kinase, 90kDa, polypeptide 1                           |
| 27445     | PCLO         | piccolo (presynaptic cytomatrix protein)                                    |
| 645634    | ANO7L1       | anoctamin 7-like 1                                                          |
| 7444      | VRK2         | vaccinia related kinase 2                                                   |
| 2199      | FBLN2        | fibulin 2                                                                   |
| 138046    | RALYL        | RALY RNA binding protein-like                                               |
| 80746     | TSEN2        | tRNA splicing endonuclease 2 homolog ( <i>S. cerevisiae</i> )               |
| 659       | BMPR2        | bone morphogenetic protein receptor, type II (serine/threonine kinase)      |
| 83417     | FCRL4        | Fc receptor-like 4                                                          |
| 150372    | NFAM1        | NFAT activating protein with ITAM motif 1                                   |
| 127733    | UBXN10       | UBX domain protein 10                                                       |
| 644325    | LOC644325    | disintegrin and metalloprotease domain protein pseudogene                   |
| 220929    | ZNF438       | zinc finger protein 438                                                     |

|           |             |                                                                                                          |
|-----------|-------------|----------------------------------------------------------------------------------------------------------|
| 28232     | SLCO3A1     | solute carrier organic anion transporter family, member 3A1                                              |
| 63978     | PRDM14      | PR domain containing 14                                                                                  |
| 10490     | VTI1B       | vesicle transport through interaction with t-SNAREs homolog 1B (yeast)                                   |
| 843       | CASP10      | caspase 10, apoptosis-related cysteine peptidase                                                         |
| 832       | CAPZB       | capping protein (actin filament) muscle Z-line, beta                                                     |
| 100132328 | [No Symbol] | [No Name]                                                                                                |
| 151176    | FAM132B     | family with sequence similarity 132, member B                                                            |
| 63923     | TNN         | tenascin N                                                                                               |
| 80125     | CCDC33      | coiled-coil domain containing 33                                                                         |
| 100130138 | [No Symbol] | [No Name]                                                                                                |
| 55504     | TNFRSF19    | tumor necrosis factor receptor superfamily, member 19                                                    |
| 54454     | ATAD2B      | ATPase family, AAA domain containing 2B                                                                  |
| 6204      | RPS10       | ribosomal protein S10                                                                                    |
| 25806     | VAX2        | ventral anterior homeobox 2                                                                              |
| 644237    | GAPDHP33    | glyceraldehyde 3 phosphate dehydrogenase pseudogene 33                                                   |
| 6002      | RGS12       | regulator of G-protein signaling 12                                                                      |
| 387715    | ARMS2       | age-related maculopathy susceptibility 2                                                                 |
| 727894    | [No Symbol] | [No Name]                                                                                                |
| 100133058 | [No Symbol] | [No Name]                                                                                                |
| 57628     | DPP10       | dipeptidyl-peptidase 10 (non-functional)                                                                 |
| 129656    | LOC129656   | CREB regulated transcription coactivator 1 pseudogene                                                    |
| 25979     | DHRS7B      | dehydrogenase/reductase (SDR family) member 7B                                                           |
| 9487      | PIGL        | phosphatidylinositol glycan anchor biosynthesis, class L                                                 |
| 2033      | EP300       | E1A binding protein p300                                                                                 |
| 2978      | GUCA1A      | guanylate cyclase activator 1A (retina)                                                                  |
| 7102      | TSPAN7      | tetraspanin 7                                                                                            |
| 4589      | MUC7        | mucin 7, secreted                                                                                        |
| 26011     | ODZ4        | odz, odd Oz/ten-m homolog 4 (Drosophila)                                                                 |
| 5552      | SRGN        | serglycin                                                                                                |
| 83733     | SLC25A18    | solute carrier family 25 (mitochondrial carrier), member 18                                              |
| 442525    | SLC25A5P5   | solute carrier family 25 (mitochondrial carrier; adenine nucleotide translocator), member 5 pseudogene 5 |
| 729497    | LOC729497   | nuclear receptor coactivator 4 pseudogene                                                                |
| 10332     | CLEC4M      | C-type lectin domain family 4, member M                                                                  |
| 344838    | PAQR9       | progesterone and adipoQ receptor family member IX                                                        |
| 647016    | EIF2S2P7    | eukaryotic translation initiation factor 2, subunit 2 beta pseudogene 7                                  |

|           |              |                                                                                                                  |
|-----------|--------------|------------------------------------------------------------------------------------------------------------------|
| 100133062 | LOC100133062 | chromosome 6 open reading frame 146 pseudogene                                                                   |
| 728896    | [No Symbol]  | [No Name]                                                                                                        |
| 168975    | CNBD1        | cyclic nucleotide binding domain containing 1                                                                    |
| 9515      | STXBP5L      | syntaxin binding protein 5-like                                                                                  |
| 100133268 | LOC100133268 | HAUS augmin-like complex subunit 6-like                                                                          |
| 79605     | PGBD5        | piggyBac transposable element derived 5                                                                          |
| 389599    | STRADBP1     | STE20-related kinase adaptor beta pseudogene 1                                                                   |
| 25976     | TIPARP       | TCDD-inducible poly(ADP-ribose) polymerase                                                                       |
| 2853      | GPR31        | G protein-coupled receptor 31                                                                                    |
| 6159      | RPL29        | ribosomal protein L29                                                                                            |
| 125488    | TTC39C       | tetratricopeptide repeat domain 39C                                                                              |
| 3268      | AGFG2        | ArfGAP with FG repeats 2                                                                                         |
| 89765     | RSPH1        | radial spoke head 1 homolog (Chlamydomonas)                                                                      |
| 9271      | PIWIL1       | piwi-like 1 (Drosophila)                                                                                         |
| 131831    | FAM194A      | family with sequence similarity 194, member A                                                                    |
| 647580    | [No Symbol]  | [No Name]                                                                                                        |
| 8664      | EIF3D        | eukaryotic translation initiation factor 3, subunit D                                                            |
| 89932     | PAPLN        | papilin, proteoglycan-like sulfated glycoprotein                                                                 |
| 84701     | COX4I2       | cytochrome c oxidase subunit IV isoform 2 (lung)                                                                 |
| 11280     | SCN11A       | sodium channel, voltage-gated, type XI, alpha subunit                                                            |
| 158248    | TTC16        | tetratricopeptide repeat domain 16                                                                               |
| 128861    | C20orf71     | chromosome 20 open reading frame 71                                                                              |
| 353299    | RGSL1        | regulator of G-protein signaling like 1                                                                          |
| 5992      | RFX4         | regulatory factor X, 4 (influences HLA class II expression)                                                      |
| 360030    | NANOGNB      | NANOG neighbor homeobox                                                                                          |
| 1129      | CHRM2        | cholinergic receptor, muscarinic 2                                                                               |
| 283551    | C14orf182    | chromosome 14 open reading frame 182                                                                             |
| 51493     | C22orf28     | chromosome 22 open reading frame 28                                                                              |
| 127623    | OR2B11       | olfactory receptor, family 2, subfamily B, member 11                                                             |
| 359739    | MRPL3P1      | mitochondrial ribosomal protein L3 pseudogene 1                                                                  |
| 10505     | SEMA4F       | sema domain, immunoglobulin domain (Ig), transmembrane domain (TM) and short cytoplasmic domain, (semaphorin) 4F |
| 387694    | SH2D4B       | SH2 domain containing 4B                                                                                         |
| 130940    | CCDC148      | coiled-coil domain containing 148                                                                                |
| 56267     | CCBL2        | cysteine conjugate-beta lyase 2                                                                                  |
| 28346     | IGHVIII-38-1 | immunoglobulin heavy variable (III)-38-1 (pseudogene)                                                            |

|           |              |                                                                                    |
|-----------|--------------|------------------------------------------------------------------------------------|
| 100131347 | LOC100131347 | RAD52 motif 1 pseudogene                                                           |
| 729707    | LOC729707    | transmembrane and tetratricopeptide repeat containing 4 pseudogene                 |
| 56914     | OTOR         | otoraplin                                                                          |
| 644451    | LOC644451    | SHQ1 homolog ( <i>S. cerevisiae</i> ) pseudogene                                   |
| 5771      | PTPN2        | protein tyrosine phosphatase, non-receptor type 2                                  |
| 83439     | TCF7L1       | transcription factor 7-like 1 (T-cell specific, HMG-box)                           |
| 8894      | EIF2S2       | eukaryotic translation initiation factor 2, subunit 2 beta, 38kDa                  |
| 23148     | NACAD        | NAC alpha domain containing                                                        |
| 3269      | HRH1         | histamine receptor H1                                                              |
| 3615      | IMPDH2       | IMP (inosine 5'-monophosphate) dehydrogenase 2                                     |
| 116154    | PHACTR3      | phosphatase and actin regulator 3                                                  |
| 1993      | ELAVL2       | ELAV (embryonic lethal, abnormal vision, <i>Drosophila</i> )-like 2 (Hu antigen B) |
| 115123    | 3-Mar        | membrane-associated ring finger (C3HC4) 3                                          |
| 282776    | OR8V1P       | olfactory receptor, family 8, subfamily V, member 1 pseudogene                     |
| 121273    | C12orf54     | chromosome 12 open reading frame 54                                                |
| 376132    | LRRC10       | leucine rich repeat containing 10                                                  |
| 8092      | ALX1         | ALX homeobox 1                                                                     |
| 3568      | IL5RA        | interleukin 5 receptor, alpha                                                      |
| 647177    | LOC647177    | glutathione S-transferase A3-like                                                  |
| 3339      | HSPG2        | heparan sulfate proteoglycan 2                                                     |
| 729977    | [No Symbol]  | [No Name]                                                                          |
| 441027    | TMEM150C     | transmembrane protein 150C                                                         |
| 22887     | FOXJ3        | forkhead box J3                                                                    |
| 100132318 | [No Symbol]  | [No Name]                                                                          |
| 10011     | SRA1         | steroid receptor RNA activator 1                                                   |
| 645646    | FAM32C       | family with sequence similarity 32, member C (pseudogene)                          |
| 1045      | CDX2         | caudal type homeobox 2                                                             |
| 9563      | H6PD         | hexose-6-phosphate dehydrogenase (glucose 1-dehydrogenase)                         |
| 100130044 | LOC100130044 | chromosome 7 open reading frame 63 pseudogene                                      |
| 138065    | RNF183       | ring finger protein 183                                                            |
| 79033     | ERI3         | ERI1 exoribonuclease family member 3                                               |
| 80325     | ABTB1        | ankyrin repeat and BTB (POZ) domain containing 1                                   |
| 1506      | CTRL         | chymotrypsin-like                                                                  |
| 8789      | FBP2         | fructose-1,6-bisphosphatase 2                                                      |
| 6699      | SPRR1B       | small proline-rich protein 1B                                                      |

|           |              |                                                                                                                  |
|-----------|--------------|------------------------------------------------------------------------------------------------------------------|
| 6262      | RYR2         | ryanodine receptor 2 (cardiac)                                                                                   |
| 9649      | RALGPS1      | Ral GEF with PH domain and SH3 binding motif 1                                                                   |
| 100130801 | LOC100130801 | lupus La protein-like                                                                                            |
| 124359    | CDYL2        | chromodomain protein, Y-like 2                                                                                   |
| 167681    | PRSS35       | protease, serine, 35                                                                                             |
| 9170      | LPAR2        | lysophosphatidic acid receptor 2                                                                                 |
| 54857     | GDPD2        | glycerophosphodiester phosphodiesterase domain containing 2                                                      |
| 392510    | YWHAQP8      | YWHAQ pseudogene 8                                                                                               |
| 100132009 | LOC100132009 | Pentatricopeptide repeat domain 3 pseudogene                                                                     |
| 7554      | ZNF8         | zinc finger protein 8                                                                                            |
| 404636    | FAM45A       | family with sequence similarity 45, member A                                                                     |
| 84791     | C1orf97      | chromosome 1 open reading frame 97                                                                               |
| 81706     | PPP1R14C     | protein phosphatase 1, regulatory (inhibitor) subunit 14C                                                        |
| 138162    | C9orf116     | chromosome 9 open reading frame 116                                                                              |
| 286075    | ZNF707       | zinc finger protein 707                                                                                          |
| 8653      | DDX3Y        | DEAD (Asp-Glu-Ala-Asp) box polypeptide 3, Y-linked                                                               |
| 55809     | TRERF1       | transcriptional regulating factor 1                                                                              |
| 100130042 | LOC100130042 | methylenetetrahydrofolate dehydrogenase (NADP+ dependent) 2, methylenetetrahydrofolate cyclohydrolase pseudogene |
| 388276    | LOC388276    | hCG2045437                                                                                                       |
| 1111      | CHEK1        | CHK1 checkpoint homolog (S. pombe)                                                                               |
| 57088     | PLSCR4       | phospholipid scramblase 4                                                                                        |
| 100130718 | RPL34P26     | ribosomal protein L34 pseudogene 26                                                                              |
| 6586      | SLIT3        | slit homolog 3 (Drosophila)                                                                                      |
| 10103     | TSPAN1       | tetraspanin 1                                                                                                    |
| 317727    | LOC317727    | ataxin 2 related protein pseudogene                                                                              |
| 729975    | FLJ30403     | hypothetical LOC729975                                                                                           |
| 54954     | FAM120C      | family with sequence similarity 120C                                                                             |
| 149428    | BNIPL        | BCL2/adenovirus E1B 19kD interacting protein like                                                                |
| 222950    | C7orf51      | chromosome 7 open reading frame 51                                                                               |
| 390597    | LETM1P1      | leucine zipper-EF-hand containing transmembrane protein 1, pseudogene 1                                          |
| 5740      | PTGIS        | prostaglandin I2 (prostacyclin) synthase                                                                         |
| 144699    | FBXL14       | F-box and leucine-rich repeat protein 14                                                                         |
| 677       | ZFP36L1      | zinc finger protein 36, C3H type-like 1                                                                          |
| 6283      | S100A12      | S100 calcium binding protein A12                                                                                 |
| 26548     | ITGB1BP2     | integrin beta 1 binding protein (melusin) 2                                                                      |

|           |              |                                                                                        |
|-----------|--------------|----------------------------------------------------------------------------------------|
| 11012     | KLK11        | kallikrein-related peptidase 11                                                        |
| 149837    | LOC149837    | hypothetical LOC149837                                                                 |
| 78986     | DUSP26       | dual specificity phosphatase 26 (putative)                                             |
| 100129126 | LOC100129126 | hypothetical LOC100129126                                                              |
| 79912     | PYROXD1      | pyridine nucleotide-disulphide oxidoreductase domain 1                                 |
| 127343    | DMBX1        | diencephalon/mesencephalon homeobox 1                                                  |
| 222008    | VSTM2A       | V-set and transmembrane domain containing 2A                                           |
| 51300     | C3orf1       | chromosome 3 open reading frame 1                                                      |
| 56269     | IRGC         | immunity-related GTPase family, cinema                                                 |
| 728573    | LOC728573    | hypothetical protein LOC728573                                                         |
| 727977    | [No Symbol]  | [No Name]                                                                              |
| 57482     | KIAA1211     | KIAA1211                                                                               |
| 93190     | C1orf158     | chromosome 1 open reading frame 158                                                    |
| 56243     | KIAA1217     | KIAA1217                                                                               |
| 401541    | CENPP        | centromere protein P                                                                   |
| 1936      | EEF1D        | eukaryotic translation elongation factor 1 delta (guanine nucleotide exchange protein) |
| 84230     | LRR8C        | leucine rich repeat containing 8 family, member C                                      |
| 65061     | CDK15        | cyclin-dependent kinase 15                                                             |
| 403284    | OR6C68       | olfactory receptor, family 6, subfamily C, member 68                                   |
| 23543     | RBFOX2       | RNA binding protein, fox-1 homolog (C. elegans) 2                                      |
| 285195    | SLC9A9       | solute carrier family 9 (sodium/hydrogen exchanger), member 9                          |
| 9767      | PHF16        | PHD finger protein 16                                                                  |
| 9420      | CYP7B1       | cytochrome P450, family 7, subfamily B, polypeptide 1                                  |
| 345557    | PLCXD3       | phosphatidylinositol-specific phospholipase C, X domain containing 3                   |
| 160065    | PATE1        | prostate and testis expressed 1                                                        |
| 55917     | CTTNBP2NL    | CTTNBP2 N-terminal like                                                                |
| 5898      | RALA         | v-ral simian leukemia viral oncogene homolog A (ras related)                           |
| 5207      | PFKFB1       | 6-phosphofructo-2-kinase/fructose-2,6-biphosphatase 1                                  |
| 146771    | TCAM1P       | testicular cell adhesion molecule 1 homolog (mouse), pseudogene                        |
| 2168      | FABP1        | fatty acid binding protein 1, liver                                                    |
| 255119    | C4orf22      | chromosome 4 open reading frame 22                                                     |
| 221481    | C6orf81      | chromosome 6 open reading frame 81                                                     |
| 8630      | HSD17B6      | hydroxysteroid (17-beta) dehydrogenase 6 homolog (mouse)                               |
| 100131892 | [No Symbol]  | [No Name]                                                                              |
| 728621    | CCDC30       | coiled-coil domain containing 30                                                       |

|           |              |                                                                                 |
|-----------|--------------|---------------------------------------------------------------------------------|
| 338674    | OR5F1        | olfactory receptor, family 5, subfamily F, member 1                             |
| 100128977 | LOC100128977 | hypothetical LOC100128977                                                       |
| 114792    | KLHL32       | kelch-like 32 (Drosophila)                                                      |
| 391696    | LOC391696    | synaptic glycoprotein SC2-like                                                  |
| 91695     | RRP7B        | ribosomal RNA processing 7 homolog B (S. cerevisiae)                            |
| 406992    | MIR210       | microRNA 210                                                                    |
| 10279     | PRSS16       | protease, serine, 16 (thymus)                                                   |
| 218       | ALDH3A1      | aldehyde dehydrogenase 3 family, member A1                                      |
| 3752      | KCND3        | potassium voltage-gated channel, Shal-related subfamily, member 3               |
| 100131195 | LOC100131195 | hypothetical protein LOC100131195                                               |
| 25859     | PART1        | prostate androgen-regulated transcript 1 (non-protein coding)                   |
| 10216     | PRG4         | proteoglycan 4                                                                  |
| 261734    | NPHP4        | nephronophthisis 4                                                              |
| 340273    | ABCB5        | ATP-binding cassette, sub-family B (MDR/TAP), member 5                          |
| 10542     | HBXIP        | hepatitis B virus x interacting protein                                         |
| 401114    | FLJ35816     | FLJ35816 protein                                                                |
| 100132146 | LOC100132146 | hypothetical LOC100132146                                                       |
| 644154    | RPL10AP8     | ribosomal protein L10a pseudogene 8                                             |
| 6913      | TBX15        | T-box 15                                                                        |
| 5161      | PDHA2        | pyruvate dehydrogenase (lipoamide) alpha 2                                      |
| 1638      | DCT          | dopachrome tautomerase (dopachrome delta-isomerase, tyrosine-related protein 2) |
| 392145    | LOC392145    | exosome component 6 pseudogene                                                  |
| 54212     | SNTG1        | syntrophin, gamma 1                                                             |
| 9068      | ANGPTL1      | angiopoietin-like 1                                                             |
| 8675      | STX16        | syntaxin 16                                                                     |
| 91734     | IDI2         | isopentenyl-diphosphate delta isomerase 2                                       |
| 440518    | LOC440518    | golgin A2 pseudogene                                                            |
| 786       | CACNG1       | calcium channel, voltage-dependent, gamma subunit 1                             |
| 128434    | VSTM2L       | V-set and transmembrane domain containing 2 like                                |
| 7099      | TLR4         | toll-like receptor 4                                                            |
| 23521     | RPL13A       | ribosomal protein L13a                                                          |
| 643342    | LOC643342    | ATM interactor pseudogene                                                       |
| 143666    | LOC143666    | hypothetical LOC143666                                                          |
| 27010     | TPK1         | thiamin pyrophosphokinase 1                                                     |
| 54788     | DNAJB12      | DnaJ (Hsp40) homolog, subfamily B, member 12                                    |



|           |             |                                                                        |
|-----------|-------------|------------------------------------------------------------------------|
| 10762     | NUP50       | nucleoporin 50kDa                                                      |
| 653645    | DHX40P1     | DEAH (Asp-Glu-Ala-His) box polypeptide 40 pseudogene 1                 |
| 2922      | GRP         | gastrin-releasing peptide                                              |
| 414899    | BLID        | BH3-like motif containing, cell death inducer                          |
| 60482     | SLC5A7      | solute carrier family 5 (choline transporter), member 7                |
| 51078     | THAP4       | THAP domain containing 4                                               |
| 326297    | RPL26P2     | ribosomal protein L26 pseudogene 2                                     |
| 100130184 | [No Symbol] | [No Name]                                                              |
| 4544      | MTNR1B      | melatonin receptor 1B                                                  |
| 64409     | WBSCR17     | Williams-Beuren syndrome chromosome region 17                          |
| 643471    | KRT18P12    | keratin 18 pseudogene 12                                               |
| 84173     | ELMOD3      | ELMO/CED-12 domain containing 3                                        |
| 114088    | TRIM9       | tripartite motif containing 9                                          |
| 10642     | IGF2BP1     | insulin-like growth factor 2 mRNA binding protein 1                    |
| 55277     | FGGY        | FGGY carbohydrate kinase domain containing                             |
| 8543      | LMO4        | LIM domain only 4                                                      |
| 401191    | FLJ46010    | FLJ46010 protein                                                       |
| 647281    | [No Symbol] | [No Name]                                                              |
| 4595      | MUTYH       | mutY homolog (E. coli)                                                 |
| 100128066 | [No Symbol] | [No Name]                                                              |
| 257062    | TMEM146     | transmembrane protein 146                                              |
| 6566      | SLC16A1     | solute carrier family 16, member 1 (monocarboxylic acid transporter 1) |
| 1932      | EEF1B2P1    | eukaryotic translation elongation factor 1 beta 2 pseudogene 1         |
| 100128852 | [No Symbol] | [No Name]                                                              |
| 84310     | C7orf50     | chromosome 7 open reading frame 50                                     |
| 60313     | GPBP1L1     | GC-rich promoter binding protein 1-like 1                              |
| 401498    | TMEM215     | transmembrane protein 215                                              |
| 340543    | TCEAL5      | transcription elongation factor A (SII)-like 5                         |
| 390035    | OR52K3P     | olfactory receptor, family 52, subfamily K, member 3 pseudogene        |
| 253724    | GNN         | Grp94 neighboring nucleotidase pseudogene                              |
| 64168     | NECAB1      | N-terminal EF-hand calcium binding protein 1                           |
| 5710      | PSMD4       | proteasome (prosome, macropain) 26S subunit, non-ATPase, 4             |
| 344905    | ATP13A5     | ATPase type 13A5                                                       |
| 9615      | GDA         | guanine deaminase                                                      |
| 9865      | TRIL        | TLR4 interactor with leucine-rich repeats                              |

|           |              |                                                                      |
|-----------|--------------|----------------------------------------------------------------------|
| 10777     | ARPP21       | cAMP-regulated phosphoprotein, 21kDa                                 |
| 100126521 | TRNAW-CCA    | transfer RNA tryptophan (anticodon CCA)                              |
| 400593    | FLJ43944     | FLJ43944 protein                                                     |
| 131405    | TRIM71       | tripartite motif containing 71                                       |
| 3560      | IL2RB        | interleukin 2 receptor, beta                                         |
| 55714     | ODZ3         | odz, odd Oz/ten-m homolog 3 (Drosophila)                             |
| 54052     | EIF4A1P1     | eukaryotic translation initiation factor 4A1 pseudogene 1            |
| 57157     | PHTF2        | putative homeodomain transcription factor 2                          |
| 642337    | FTLP17       | ferritin, light polypeptide pseudogene 17                            |
| 360203    | GLT6D1       | glycosyltransferase 6 domain containing 1                            |
| 399783    | LOC399783    | zinc finger protein 532 pseudogene                                   |
| 1360      | CPB1         | carboxypeptidase B1 (tissue)                                         |
| 2915      | GRM5         | glutamate receptor, metabotropic 5                                   |
| 646956    | LOC646956    | heterogeneous nuclear ribonucleoprotein C (C1/C2) pseudogene         |
| 260425    | MAGI3        | membrane associated guanylate kinase, WW and PDZ domain containing 3 |
| 83605     | CCM2         | cerebral cavernous malformation 2                                    |
| 203102    | ADAM32       | ADAM metallopeptidase domain 32                                      |
| 116379    | IL22RA2      | interleukin 22 receptor, alpha 2                                     |
| 353497    | POLN         | polymerase (DNA directed) nu                                         |
| 642511    | LOC642511    | hypothetical protein LOC642511                                       |
| 400533    | FLJ26245     | hypothetical LOC400533                                               |
| 126206    | NLRP5        | NLR family, pyrin domain containing 5                                |
| 220441    | RNF152       | ring finger protein 152                                              |
| 100126527 | TRNAR-CCU    | transfer RNA arginine (anticodon CCU)                                |
| 647099    | RPL23AP42    | ribosomal protein L23a pseudogene 42                                 |
| 387914    | SHISA2       | shisa homolog 2 (Xenopus laevis)                                     |
| 100132656 | LOC100132656 | FK506 binding protein 4, 59kDa pseudogene                            |
| 379007    | RBMV2SP      | RNA binding motif protein, Y-linked, family 2, member S pseudogene   |
| 221823    | PRPS1L1      | phosphoribosyl pyrophosphate synthetase 1-like 1                     |
| 2984      | GUCY2C       | guanylate cyclase 2C (heat stable enterotoxin receptor)              |
| 10267     | RAMP1        | receptor (G protein-coupled) activity modifying protein 1            |
| 255967    | PAN3         | PAN3 poly(A) specific ribonuclease subunit homolog (S. cerevisiae)   |
| 10669     | CGREF1       | cell growth regulator with EF-hand domain 1                          |
| 339483    | MTMR9LP      | myotubularin related protein 9-like, pseudogene                      |
| 200810    | ALG1L        | asparagine-linked glycosylation 1-like                               |

|        |           |                                                                                |
|--------|-----------|--------------------------------------------------------------------------------|
| 58189  | WFDC1     | WAP four-disulfide core domain 1                                               |
| 390928 | PAPL      | iron/zinc purple acid phosphatase-like protein                                 |
| 113146 | AHNAK2    | AHNAK nucleoprotein 2                                                          |
| 441643 | LOC441643 | p53 and DNA damage-regulated protein 1-like                                    |
| 340460 | KRT18P24  | keratin 18 pseudogene 24                                                       |
| 80019  | UBTD1     | ubiquitin domain containing 1                                                  |
| 7224   | TRPC5     | transient receptor potential cation channel, subfamily C, member 5             |
| 114789 | SLC25A25  | solute carrier family 25 (mitochondrial carrier; phosphate carrier), member 25 |
| 389197 | C4orf50   | chromosome 4 open reading frame 50                                             |
| 81578  | COL21A1   | collagen, type XXI, alpha 1                                                    |
| 6809   | STX3      | syntaxin 3                                                                     |
| 3763   | KCNJ6     | potassium inwardly-rectifying channel, subfamily J, member 6                   |
| 5746   | PTH2R     | parathyroid hormone 2 receptor                                                 |
| 199720 | GGN       | gametogenetin                                                                  |
| 10690  | FUT9      | fucosyltransferase 9 (alpha (1,3) fucosyltransferase)                          |
| 646995 | LOC646995 | tripartite motif-containing protein 38-like                                    |
| 285759 | FLJ34503  | hypothetical FLJ34503                                                          |
| 1119   | CHKA      | choline kinase alpha                                                           |
| 57007  | CXCR7     | chemokine (C-X-C motif) receptor 7                                             |
| 441239 | LOC441239 | hypothetical protein LOC441239                                                 |
| 391387 | RPSAP28   | ribosomal protein SA pseudogene 28                                             |
| 63876  | PKNOX2    | PBX/knotted 1 homeobox 2                                                       |
| 132200 | C3orf49   | chromosome 3 open reading frame 49                                             |
| 126308 | MOBKL2A   | MOB1, Mps One Binder kinase activator-like 2A (yeast)                          |
| 7448   | VTN       | vitronectin                                                                    |
| 2048   | EPHB2     | EPH receptor B2                                                                |
| 407    | ARR3      | arrestin 3, retinal (X-arrestin)                                               |
| 2494   | NR5A2     | nuclear receptor subfamily 5, group A, member 2                                |
| 108    | ADCY2     | adenylate cyclase 2 (brain)                                                    |
| 10633  | RASL10A   | RAS-like, family 10, member A                                                  |
| 7025   | NR2F1     | nuclear receptor subfamily 2, group F, member 1                                |
| 3361   | HTR5A     | 5-hydroxytryptamine (serotonin) receptor 5A                                    |
| 54952  | TRNAU1AP  | tRNA selenocysteine 1 associated protein 1                                     |
| 8829   | NRP1      | neuropilin 1                                                                   |
| 9351   | SLC9A3R2  | solute carrier family 9 (sodium/hydrogen exchanger), member 3 regulator 2      |

|           |              |                                                                               |
|-----------|--------------|-------------------------------------------------------------------------------|
| 7080      | NKX2-1       | NK2 homeobox 1                                                                |
| 100131576 | [No Symbol]  | [No Name]                                                                     |
| 255308    | LOC255308    | eukaryotic translation initiation factor 2, subunit 3 gamma, 52kDa pseudogene |
| 57462     | KIAA1161     | KIAA1161                                                                      |
| 100128921 | [No Symbol]  | [No Name]                                                                     |
| 54810     | GIPC2        | GIPC PDZ domain containing family, member 2                                   |
| 100130502 | LOC100130502 | hypothetical LOC100130502                                                     |
| 391053    | CAPNS1P1     | calpain, small subunit 1 pseudogene 1                                         |
| 100128547 | [No Symbol]  | [No Name]                                                                     |
| 51305     | KCNK9        | potassium channel, subfamily K, member 9                                      |
| 644743    | LOC644743    | keratin 8 pseudogene                                                          |
| 121130    | OR10P1       | olfactory receptor, family 10, subfamily P, member 1                          |
| 130589    | GALM         | galactose mutarotase (aldose 1-epimerase)                                     |
| 60673     | C12orf44     | chromosome 12 open reading frame 44                                           |
| 642554    | LOC642554    | leucine rich repeat containing 59 pseudogene                                  |
| 10178     | ODZ1         | odz, odd Oz/ten-m homolog 1 (Drosophila)                                      |
| 27128     | CYTH4        | cytohesin 4                                                                   |
| 92691     | TMEM169      | transmembrane protein 169                                                     |
| 6369      | CCL24        | chemokine (C-C motif) ligand 24                                               |
| 26516     | RPS5P1       | ribosomal protein S5 pseudogene 1                                             |
| 391722    | LOC391722    | calcium-dependent protein kinase 7-like                                       |
| 285989    | ZNF789       | zinc finger protein 789                                                       |
| 390892    | OR7A10       | olfactory receptor, family 7, subfamily A, member 10                          |
| 4651      | MYO10        | myosin X                                                                      |
| 730036    | [No Symbol]  | [No Name]                                                                     |
| 93166     | PRDM6        | PR domain containing 6                                                        |
| 401123    | FLJ45721     | hypothetical LOC401123                                                        |
| 51251     | NT5C3        | 5'-nucleotidase, cytosolic III                                                |
| 8515      | ITGA10       | integrin, alpha 10                                                            |
| 100130316 | LOC100130316 | putative RNA-binding protein 15-like                                          |
| 6440      | SFTPC        | surfactant protein C                                                          |
| 344191    | EVX2         | even-skipped homeobox 2                                                       |
| 55584     | CHRNA9       | cholinergic receptor, nicotinic, alpha 9                                      |
| 643751    | LOC643751    | cell division cycle 42 pseudogene                                             |
| 5950      | RBP4         | retinol binding protein 4, plasma                                             |

|           |              |                                                                                             |
|-----------|--------------|---------------------------------------------------------------------------------------------|
| 200539    | ANKRD23      | ankyrin repeat domain 23                                                                    |
| 79308     | OR4P1P       | olfactory receptor, family 4, subfamily P, member 1 pseudogene                              |
| 100130605 | [No Symbol]  | [No Name]                                                                                   |
| 100129033 | LOC100129033 | QIQN5815                                                                                    |
| 55315     | SLC29A3      | solute carrier family 29 (nucleoside transporters), member 3                                |
| 1586      | CYP17A1      | cytochrome P450, family 17, subfamily A, polypeptide 1                                      |
| 81025     | GJA9         | gap junction protein, alpha 9, 59kDa                                                        |
| 653381    | SORD2        | SORD pseudogene                                                                             |
| 619373    | MBOAT4       | membrane bound O-acyltransferase domain containing 4                                        |
| 90865     | IL33         | interleukin 33                                                                              |
| 441732    | [No Symbol]  | [No Name]                                                                                   |
| 285600    | KIAA0825     | KIAA0825                                                                                    |
| 7172      | TPMT         | thiopurine S-methyltransferase                                                              |
| 283711    | LOC283711    | ubiquitin-conjugating enzyme E2C pseudogene                                                 |
| 2609      | GAPDHP67     | glyceraldehyde 3 phosphate dehydrogenase pseudogene 67                                      |
| 100130329 | LOC100130329 | solute carrier family 41, member 2 pseudogene                                               |
| 100128017 | TULP3P1      | tubby like protein 3 pseudogene 1                                                           |
| 140456    | ASB11        | ankyrin repeat and SOCS box containing 11                                                   |
| 221091    | LRRN4CL      | LRRN4 C-terminal like                                                                       |
| 51327     | AHSP         | alpha hemoglobin stabilizing protein                                                        |
| 401474    | SAMD12       | sterile alpha motif domain containing 12                                                    |
| 145165    | ST13P4       | suppression of tumorigenicity 13 (colon carcinoma) (Hsp70 interacting protein) pseudogene 4 |
| 80256     | KIAA1539     | KIAA1539                                                                                    |
| 7075      | TIE1         | tyrosine kinase with immunoglobulin-like and EGF-like domains 1                             |
| 83690     | CRISPLD1     | cysteine-rich secretory protein LCCL domain containing 1                                    |
| 3205      | HOXA9        | homeobox A9                                                                                 |
| 283212    | KLHL35       | kelch-like 35 (Drosophila)                                                                  |
| 51083     | GAL          | galanin prepropeptide                                                                       |
| 22955     | SCMH1        | sex comb on midleg homolog 1 (Drosophila)                                                   |
| 1010      | CDH12        | cadherin 12, type 2 (N-cadherin 2)                                                          |
| 11031     | RAB31        | RAB31, member RAS oncogene family                                                           |
| 392225    | LOC392225    | phosducin-like 3 pseudogene                                                                 |
| 4025      | LPO          | lactoperoxidase                                                                             |
| 27159     | CHIA         | chitinase, acidic                                                                           |
| 123787    | PRSS29P      | protease, serine, 29 pseudogene                                                             |

|           |              |                                                                  |
|-----------|--------------|------------------------------------------------------------------|
| 51130     | ASB3         | ankyrin repeat and SOCS box containing 3                         |
| 885       | CCK          | cholecystokinin                                                  |
| 645944    | [No Symbol]  | [No Name]                                                        |
| 401973    | OR10J6P      | olfactory receptor, family 10, subfamily J, member 6 pseudogene  |
| 286053    | NSMCE2       | non-SMC element 2, MMS21 homolog ( <i>S. cerevisiae</i> )        |
| 257106    | ARHGAP30     | Rho GTPase activating protein 30                                 |
| 114819    | CROCCP3      | ciliary rootlet coiled-coil, rootletin pseudogene 3              |
| 57453     | DSCAML1      | Down syndrome cell adhesion molecule like 1                      |
| 127665    | ZNF648       | zinc finger protein 648                                          |
| 79083     | MLPH         | melanophilin                                                     |
| 728392    | LOC728392    | hypothetical protein LOC728392                                   |
| 359710    | C20orf185    | chromosome 20 open reading frame 185                             |
| 91746     | YTHDC1       | YTH domain containing 1                                          |
| 730043    | LOC730043    | hypothetical LOC730043                                           |
| 401705    | [No Symbol]  | [No Name]                                                        |
| 79034     | C7orf26      | chromosome 7 open reading frame 26                               |
| 10865     | ARID5A       | AT rich interactive domain 5A (MRF1-like)                        |
| 130367    | SGPP2        | sphingosine-1-phosphate phosphatase 2                            |
| 4137      | MAPT         | microtubule-associated protein tau                               |
| 7455      | ZAN          | zonadhesin                                                       |
| 1318      | SLC31A2      | solute carrier family 31 (copper transporters), member 2         |
| 2903      | GRIN2A       | glutamate receptor, ionotropic, N-methyl D-aspartate 2A          |
| 56961     | SHD          | Src homology 2 domain containing transforming protein D          |
| 136263    | C7orf45      | chromosome 7 open reading frame 45                               |
| 158521    | FMR1NB       | fragile X mental retardation 1 neighbor                          |
| 389328    | [No Symbol]  | [No Name]                                                        |
| 100132822 | LOC100132822 | uncharacterized protein FLJ40521-like                            |
| 11155     | LDB3         | LIM domain binding 3                                             |
| 23519     | ANP32D       | acidic (leucine-rich) nuclear phosphoprotein 32 family, member D |
| 143379    | C10orf82     | chromosome 10 open reading frame 82                              |
| 2867      | FFAR2        | free fatty acid receptor 2                                       |
| 5919      | RARRES2      | retinoic acid receptor responder (tazarotene induced) 2          |
| 65055     | REEP1        | receptor accessory protein 1                                     |
| 54073     | [No Symbol]  | [No Name]                                                        |
| 8707      | B3GALT2      | UDP-Gal:betaGlcNAc beta 1,3-galactosyltransferase, polypeptide 2 |

|           |              |                                                                                                                                             |
|-----------|--------------|---------------------------------------------------------------------------------------------------------------------------------------------|
| 1437      | CSF2         | colony stimulating factor 2 (granulocyte-macrophage)                                                                                        |
| 26267     | FBXO10       | F-box protein 10                                                                                                                            |
| 100132225 | [No Symbol]  | [No Name]                                                                                                                                   |
| 388588    | LOC388588    | hypothetical protein LOC388588                                                                                                              |
| 10058     | ABCB6        | ATP-binding cassette, sub-family B (MDR/TAP), member 6                                                                                      |
| 57624     | KIAA1486     | KIAA1486                                                                                                                                    |
| 5126      | PCSK2        | proprotein convertase subtilisin/kexin type 2                                                                                               |
| 6949      | TCOF1        | Treacher Collins-Franceschetti syndrome 1                                                                                                   |
| 140578    | CHODL        | chondrolectin                                                                                                                               |
| 50506     | DUOX2        | dual oxidase 2                                                                                                                              |
| 114196    | SIGLEC24P    | sialic acid binding Ig-like lectin 24, pseudogene                                                                                           |
| 29062     | WDR91        | WD repeat domain 91                                                                                                                         |
| 1046      | CDX4         | caudal type homeobox 4                                                                                                                      |
| 642938    | FAM196A      | family with sequence similarity 196, member A                                                                                               |
| 255104    | TMCO4        | transmembrane and coiled-coil domains 4                                                                                                     |
| 79677     | SMC6         | structural maintenance of chromosomes 6                                                                                                     |
| 100131617 | LOC100131617 | v-ets erythroblastosis virus E26 oncogene homolog 2 (avian) pseudogene                                                                      |
| 100131603 | LOC100131603 | zinc finger protein 93-like                                                                                                                 |
| 100128272 | [No Symbol]  | [No Name]                                                                                                                                   |
| 388882    | LOC388882    | hypothetical LOC388882                                                                                                                      |
| 343629    | [No Symbol]  | [No Name]                                                                                                                                   |
| 54437     | SEMA5B       | sema domain, seven thrombospondin repeats (type 1 and type 1-like), transmembrane domain (TM) and short cytoplasmic domain, (semaphorin) 5B |
| 151242    | PPP1R1C      | protein phosphatase 1, regulatory (inhibitor) subunit 1C                                                                                    |
| 3883      | KRT33A       | keratin 33A                                                                                                                                 |
| 113746    | ODF3         | outer dense fiber of sperm tails 3                                                                                                          |
| 266783    | PSMD2P1      | proteasome 26S subunit, non-ATPase, 2 pseudogene 1                                                                                          |
| 1607      | DGKB         | diacylglycerol kinase, beta 90kDa                                                                                                           |
| 386726    | FAM8A4P      | family with sequence similarity 8, member A1 pseudogene                                                                                     |
| 1953      | MEGF6        | multiple EGF-like-domains 6                                                                                                                 |
| 152831    | KLB          | klotho beta                                                                                                                                 |
| 377047    | PRSS45       | protease, serine, 45                                                                                                                        |
| 147646    | LOC147646    | hypothetical protein LOC147646                                                                                                              |
| 10458     | BAIAP2       | BAI1-associated protein 2                                                                                                                   |
| 100132159 | LOC100132159 | hypothetical LOC100132159                                                                                                                   |
| 1814      | DRD3         | dopamine receptor D3                                                                                                                        |

|           |              |                                                                             |
|-----------|--------------|-----------------------------------------------------------------------------|
| 191585    | PLAC4        | placenta-specific 4                                                         |
| 400830    | DEFB132      | defensin, beta 132                                                          |
| 440387    | CTRB2        | chymotrypsinogen B2                                                         |
| 132014    | IL17RE       | interleukin 17 receptor E                                                   |
| 326275    | RPL12P7      | ribosomal protein L12 pseudogene 7                                          |
| 131890    | GRK7         | G protein-coupled receptor kinase 7                                         |
| 4135      | MAP6         | microtubule-associated protein 6                                            |
| 122664    | TPPP2        | tubulin polymerization-promoting protein family member 2                    |
| 10972     | TMED10       | transmembrane emp24-like trafficking protein 10 (yeast)                     |
| 10022     | INSL5        | insulin-like 5                                                              |
| 26281     | FGF20        | fibroblast growth factor 20                                                 |
| 133748    | RPL7AP32     | ribosomal protein L7a pseudogene 32                                         |
| 442266    | YAP1P1       | Yes-associated protein 1 pseudogene 1                                       |
| 57758     | SCUBE2       | signal peptide, CUB domain, EGF-like 2                                      |
| 729229    | [No Symbol]  | [No Name]                                                                   |
| 3776      | KCNK2        | potassium channel, subfamily K, member 2                                    |
| 6557      | SLC12A1      | solute carrier family 12 (sodium/potassium/chloride transporters), member 1 |
| 285755    | PPIL6        | peptidylprolyl isomerase (cyclophilin)-like 6                               |
| 100130647 | [No Symbol]  | [No Name]                                                                   |
| 220004    | C11orf66     | chromosome 11 open reading frame 66                                         |
| 648532    | LOC648532    | nuclear receptor binding factor 2 pseudogene                                |
| 3938      | LCT          | lactase                                                                     |
| 26027     | ACOT11       | acyl-CoA thioesterase 11                                                    |
| 100128661 | [No Symbol]  | [No Name]                                                                   |
| 100131700 | [No Symbol]  | [No Name]                                                                   |
| 153579    | BTNL9        | butyrophilin-like 9                                                         |
| 440132    | LOC440132    | hCG1815504                                                                  |
| 84272     | YIPF4        | Yip1 domain family, member 4                                                |
| 80736     | SLC44A4      | solute carrier family 44, member 4                                          |
| 9125      | RQCD1        | RCD1 required for cell differentiation1 homolog ( <i>S. pombe</i> )         |
| 6252      | RTN1         | reticulon 1                                                                 |
| 84083     | ZRANB3       | zinc finger, RAN-binding domain containing 3                                |
| 648442    | LOC648442    | eukaryotic translation initiation factor 3, subunit I pseudogene            |
| 100128707 | LOC100128707 | MKI67 (FHA domain) interacting nucleolar phosphoprotein pseudogene          |
| 254050    | LRRC43       | leucine rich repeat containing 43                                           |



|           |              |                                                                                                   |
|-----------|--------------|---------------------------------------------------------------------------------------------------|
| 80267     | EDEM3        | ER degradation enhancer, mannosidase alpha-like 3                                                 |
| 100132814 | [No Symbol]  | [No Name]                                                                                         |
| 477       | ATP1A2       | ATPase, Na <sup>+</sup> /K <sup>+</sup> transporting, alpha 2 polypeptide                         |
| 503634    | DUXAP5       | double homeobox A pseudogene 5                                                                    |
| 176       | ACAN         | aggrecan                                                                                          |
| 285220    | EPHA6        | EPH receptor A6                                                                                   |
| 728318    | KRTAP9-1     | keratin associated protein 9-1                                                                    |
| 79644     | SRD5A3       | steroid 5 alpha-reductase 3                                                                       |
| 5530      | PPP3CA       | protein phosphatase 3, catalytic subunit, alpha isozyme                                           |
| 23765     | IL17RA       | interleukin 17 receptor A                                                                         |
| 283847    | CCDC79       | coiled-coil domain containing 79                                                                  |
| 79639     | TMEM53       | transmembrane protein 53                                                                          |
| 57595     | PDZD4        | PDZ domain containing 4                                                                           |
| 138009    | DCAF4L2      | DDB1 and CUL4 associated factor 4-like 2                                                          |
| 57537     | SORCS2       | sortilin-related VPS10 domain containing receptor 2                                               |
| 54329     | GPR85        | G protein-coupled receptor 85                                                                     |
| 160492    | IFLTD1       | intermediate filament tail domain containing 1                                                    |
| 81261     | OR52H2P      | olfactory receptor, family 52, subfamily H, member 2 pseudogene                                   |
| 2557      | GABRA4       | gamma-aminobutyric acid (GABA) A receptor, alpha 4                                                |
| 3336      | HSPE1        | heat shock 10kDa protein 1 (chaperonin 10)                                                        |
| 3898      | LAD1         | ladinin 1                                                                                         |
| 55112     | WDR60        | WD repeat domain 60                                                                               |
| 152100    | CMC1         | COX assembly mitochondrial protein homolog ( <i>S. cerevisiae</i> )                               |
| 64184     | EDDM3B       | epididymal protein 3B                                                                             |
| 643308    | LOC643308    | ribosomal protein L7 pseudogene                                                                   |
| 388007    | SERPINA13    | serpin peptidase inhibitor, clade A (alpha-1 antiproteinase, antitrypsin), member 13 (pseudogene) |
| 5602      | MAPK10       | mitogen-activated protein kinase 10                                                               |
| 100132919 | LOC100132919 | hypothetical protein LOC100132919                                                                 |
| 114821    | SCAND3       | SCAN domain containing 3                                                                          |
| 23371     | TENC1        | tensin like C1 domain containing phosphatase (tensin 2)                                           |
| 2125      | EVPL         | envoplakin                                                                                        |
| 126859    | AXDND1       | axonemal dynein light chain domain containing 1                                                   |
| 84539     | MCHR2        | melanin-concentrating hormone receptor 2                                                          |
| 8000      | PSCA         | prostate stem cell antigen                                                                        |
| 158038    | LINGO2       | leucine rich repeat and Ig domain containing 2                                                    |

|           |              |                                                                                        |
|-----------|--------------|----------------------------------------------------------------------------------------|
| 4580      | MTX1         | metaxin 1                                                                              |
| 402152    | RPL7L1P8     | ribosomal protein L7-like 1 pseudogene 8                                               |
| 84976     | DISP1        | dispatched homolog 1 (Drosophila)                                                      |
| 9794      | MAML1        | mastermind-like 1 (Drosophila)                                                         |
| 100130391 | YWHAQP5      | YWHAQ pseudogene 5                                                                     |
| 134082    | OR2AI1P      | olfactory receptor, family 2, subfamily AI, member 1 pseudogene                        |
| 6539      | SLC6A12      | solute carrier family 6 (neurotransmitter transporter, betaine/GABA), member 12        |
| 136227    | EMID2        | EMI domain containing 2                                                                |
| 28513     | CDH19        | cadherin 19, type 2                                                                    |
| 646770    | LOC646770    | putative tripartite motif-containing protein 77-like                                   |
| 56981     | PRDM11       | PR domain containing 11                                                                |
| 202309    | GAPT         | GRB2-binding adaptor protein, transmembrane                                            |
| 440330    | LOC440330    | hypothetical protein LOC440330                                                         |
| 353135    | LCE1E        | late cornified envelope 1E                                                             |
| 266722    | HS6ST3       | heparan sulfate 6-O-sulfotransferase 3                                                 |
| 28316     | CDH20        | cadherin 20, type 2                                                                    |
| 100132762 | LOC100132762 | chromosome 17 open reading frame 80 pseudogene                                         |
| 131474    | CHCHD4       | coiled-coil-helix-coiled-coil-helix domain containing 4                                |
| 56944     | OLFML3       | olfactomedin-like 3                                                                    |
| 25891     | PAMR1        | peptidase domain containing associated with muscle regeneration 1                      |
| 9177      | HTR3B        | 5-hydroxytryptamine (serotonin) receptor 3B                                            |
| 645251    | CBX1P1       | chromobox homolog 1 pseudogene 1                                                       |
| 789       | SLC25A20P1   | solute carrier family 25 (carnitine/acylcarnitine translocase), member 20 pseudogene 1 |
| 341032    | C11orf53     | chromosome 11 open reading frame 53                                                    |
| 166863    | RBM46        | RNA binding motif protein 46                                                           |
| 143188    | LOC143188    | hypothetical LOC143188                                                                 |
| 442267    | CCT7P1       | chaperonin containing TCP1, subunit 7 (eta) pseudogene 1                               |
| 9736      | USP34        | ubiquitin specific peptidase 34                                                        |
| 728619    | ASB9P1       | ankyrin repeat and SOCS box containing 9 pseudogene 1                                  |
| 10529     | NEBL         | nebullette                                                                             |
| 100131093 | [No Symbol]  | [No Name]                                                                              |
| 344752    | AADACL2      | arylacetamide deacetylase-like 2                                                       |
| 83868     | TTY13        | testis-specific transcript, Y-linked 13 (non-protein coding)                           |
| 57552     | NCEH1        | neutral cholesterol ester hydrolase 1                                                  |
| 199731    | CADM4        | cell adhesion molecule 4                                                               |

|           |             |                                                                            |
|-----------|-------------|----------------------------------------------------------------------------|
| 2742      | GLRA2       | glycine receptor, alpha 2                                                  |
| 9687      | GREB1       | growth regulation by estrogen in breast cancer 1                           |
| 80723     | TMEM22      | transmembrane protein 22                                                   |
| 374860    | ANKRD30B    | ankyrin repeat domain 30B                                                  |
| 84319     | C3orf26     | chromosome 3 open reading frame 26                                         |
| 6512      | SLC1A7      | solute carrier family 1 (glutamate transporter), member 7                  |
| 100129514 | [No Symbol] | [No Name]                                                                  |
| 3155      | HMGCL       | 3-hydroxymethyl-3-methylglutaryl-CoA lyase                                 |
| 2845      | GPR22       | G protein-coupled receptor 22                                              |
| 134526    | ACOT12      | acyl-CoA thioesterase 12                                                   |
| 431704    | RGS21       | regulator of G-protein signaling 21                                        |
| 128209    | KLF17       | Kruppel-like factor 17                                                     |
| 375337    | C3orf77     | chromosome 3 open reading frame 77                                         |
| 345062    | PRSS48      | protease, serine, 48                                                       |
| 100131909 | [No Symbol] | [No Name]                                                                  |
| 1996      | ELAVL4      | ELAV (embryonic lethal, abnormal vision, Drosophila)-like 4 (Hu antigen D) |
| 154288    | C6orf221    | chromosome 6 open reading frame 221                                        |
| 388324    | INCA1       | inhibitor of CDK, cyclin A1 interacting protein 1                          |
| 9760      | TOX         | thymocyte selection-associated high mobility group box                     |
| 442304    | FTLP15      | ferritin, light polypeptide pseudogene 15                                  |
| 3516      | RBPJ        | recombination signal binding protein for immunoglobulin kappa J region     |
| 121214    | SDR9C7      | short chain dehydrogenase/reductase family 9C, member 7                    |
| 390206    | RPS2P37     | ribosomal protein S2 pseudogene 37                                         |
| 6538      | SLC6A11     | solute carrier family 6 (neurotransmitter transporter, GABA), member 11    |
| 56159     | TEX11       | testis expressed 11                                                        |
| 50700     | RDH8        | retinol dehydrogenase 8 (all-trans)                                        |
| 728773    | PABPC1P2    | poly(A) binding protein, cytoplasmic 1 pseudogene 2                        |
| 339209    | [No Symbol] | [No Name]                                                                  |
| 5689      | PSMB1       | proteasome (prosome, macropain) subunit, beta type, 1                      |
| 9133      | CCNB2       | cyclin B2                                                                  |
| 2566      | GABRG2      | gamma-aminobutyric acid (GABA) A receptor, gamma 2                         |
| 525       | ATP6V1B1    | ATPase, H <sup>+</sup> transporting, lysosomal 56/58kDa, V1 subunit B1     |
| 440125    | HNRNPA1P30  | heterogeneous nuclear ribonucleoprotein A1 pseudogene 30                   |
| 84547     | PGBD1       | piggyBac transposable element derived 1                                    |
| 6707      | SPRR3       | small proline-rich protein 3                                               |

|           |             |                                                                                   |
|-----------|-------------|-----------------------------------------------------------------------------------|
| 57818     | G6PC2       | glucose-6-phosphatase, catalytic, 2                                               |
| 348303    | SELV        | selenoprotein V                                                                   |
| 6511      | SLC1A6      | solute carrier family 1 (high affinity aspartate/glutamate transporter), member 6 |
| 4143      | MAT1A       | methionine adenosyltransferase I, alpha                                           |
| 375347    | [No Symbol] | [No Name]                                                                         |
| 7060      | THBS4       | thrombospondin 4                                                                  |
| 5802      | PTPRS       | protein tyrosine phosphatase, receptor type, S                                    |
| 80851     | SH3BP5L     | SH3-binding domain protein 5-like                                                 |
| 646804    | LOC646804   | alkylated DNA repair protein alkB homolog 8-like                                  |
| 199920    | C1orf168    | chromosome 1 open reading frame 168                                               |
| 100131394 | [No Symbol] | [No Name]                                                                         |
| 4060      | LUM         | lumican                                                                           |
| 3240      | HP          | haptoglobin                                                                       |
| 100132788 | [No Symbol] | [No Name]                                                                         |
| 9600      | PITPNM1     | phosphatidylinositol transfer protein, membrane-associated 1                      |
| 646794    | LOC646794   | SNF8, ESCRT-II complex subunit, homolog ( <i>S. cerevisiae</i> ) pseudogene       |
| 100132592 | [No Symbol] | [No Name]                                                                         |
| 91404     | SESTD1      | SEC14 and spectrin domains 1                                                      |
| 100128111 | [No Symbol] | [No Name]                                                                         |
| 1750      | DLX6        | distal-less homeobox 6                                                            |
| 401044    | FLJ40712    | FLJ40712 protein                                                                  |
| 79290     | OR13A1      | olfactory receptor, family 13, subfamily A, member 1                              |
| 730194    | [No Symbol] | [No Name]                                                                         |
| 644714    | LOC644714   | hypothetical LOC644714                                                            |
| 10077     | TSPAN32     | tetraspanin 32                                                                    |
| 4000      | LMNA        | lamin A/C                                                                         |
| 23426     | GRIP1       | glutamate receptor interacting protein 1                                          |
| 100129286 | [No Symbol] | [No Name]                                                                         |
| 65268     | WNK2        | WNK lysine deficient protein kinase 2                                             |
| 220070    | SHANK2-AS3  | SHANK2 antisense RNA 3 (non-protein coding)                                       |
| 363       | AQP6        | aquaporin 6, kidney specific                                                      |
| 9367      | RAB9A       | RAB9A, member RAS oncogene family                                                 |
| 83850     | ESYT3       | extended synaptotagmin-like protein 3                                             |
| 100129153 | [No Symbol] | [No Name]                                                                         |
| 195814    | SDR16C5     | short chain dehydrogenase/reductase family 16C, member 5                          |

|           |              |                                                                                                                         |
|-----------|--------------|-------------------------------------------------------------------------------------------------------------------------|
| 388946    | LOC388946    | transmembrane protein ENSP00000343375                                                                                   |
| 647174    | SERPINE3     | serpin peptidase inhibitor, clade E (nexin, plasminogen activator inhibitor type 1), member 3                           |
| 79155     | TNIP2        | TNFAIP3 interacting protein 2                                                                                           |
| 392308    | OR13E1P      | olfactory receptor, family 13, subfamily E, member 1 pseudogene                                                         |
| 56934     | CA10         | carbonic anhydrase X                                                                                                    |
| 5545      | PRB4         | proline-rich protein BstNI subfamily 4                                                                                  |
| 729479    | [No Symbol]  | [No Name]                                                                                                               |
| 56287     | GKN1         | gastrokine 1                                                                                                            |
| 83876     | MRO          | maestro                                                                                                                 |
| 100127992 | [No Symbol]  | [No Name]                                                                                                               |
| 7021      | TFAP2B       | transcription factor AP-2 beta (activating enhancer binding protein 2 beta)                                             |
| 201134    | CEP112       | centrosomal protein 112kDa                                                                                              |
| 100129074 | PRKRIRP5     | protein-kinase, interferon-inducible double stranded RNA dependent inhibitor, repressor of (P58 repressor) pseudogene 5 |
| 9655      | SOCS5        | suppressor of cytokine signaling 5                                                                                      |
| 219453    | OR8K5        | olfactory receptor, family 8, subfamily K, member 5                                                                     |
| 80028     | FBXL18       | F-box and leucine-rich repeat protein 18                                                                                |
| 282786    | OR8G7P       | olfactory receptor, family 8, subfamily G, member 7 pseudogene                                                          |
| 79946     | C10orf95     | chromosome 10 open reading frame 95                                                                                     |
| 100129767 | LOC100129767 | transmembrane protein 180-like                                                                                          |
| 100129700 | [No Symbol]  | [No Name]                                                                                                               |
| 388121    | TNFAIP8L3    | tumor necrosis factor, alpha-induced protein 8-like 3                                                                   |
| 6442      | SGCA         | sarcoglycan, alpha (50kDa dystrophin-associated glycoprotein)                                                           |
| 83734     | ATG10        | ATG10 autophagy related 10 homolog ( <i>S. cerevisiae</i> )                                                             |
| 122509    | IFI27L1      | interferon, alpha-inducible protein 27-like 1                                                                           |
| 729739    | LOC729739    | hypothetical LOC729739                                                                                                  |
| 3713      | IVL          | involucrin                                                                                                              |
| 56832     | IFNK         | interferon, kappa                                                                                                       |
| 2899      | GRIK3        | glutamate receptor, ionotropic, kainate 3                                                                               |
| 379034    | FLJ10489     | hypothetical protein FLJ10489                                                                                           |
| 162966    | ZNF600       | zinc finger protein 600                                                                                                 |
| 676       | BRDT         | bromodomain, testis-specific                                                                                            |
| 81126     | OR4K16P      | olfactory receptor, family 4, subfamily K, member 16 pseudogene                                                         |
| 57144     | PAK7         | p21 protein (Cdc42/Rac)-activated kinase 7                                                                              |
| 11076     | TPPP         | tubulin polymerization promoting protein                                                                                |
| 146802    | SLC47A2      | solute carrier family 47, member 2                                                                                      |

|           |             |                                                                                                  |
|-----------|-------------|--------------------------------------------------------------------------------------------------|
| 343990    | C2orf55     | chromosome 2 open reading frame 55                                                               |
| 85455     | DISP2       | dispatched homolog 2 (Drosophila)                                                                |
| 51421     | AMOTL2      | angiominin like 2                                                                                |
| 26054     | SENP6       | SUMO1/sentrin specific peptidase 6                                                               |
| 343641    | TGM6        | transglutaminase 6                                                                               |
| 646270    | ELL2P1      | elongation factor, RNA polymerase II, 2 pseudogene 1                                             |
| 9289      | GPR56       | G protein-coupled receptor 56                                                                    |
| 131909    | FAM172BP    | family with sequence similarity 172, member B pseudogene                                         |
| 131669    | UROC1       | urocanase domain containing 1                                                                    |
| 9076      | CLDN1       | claudin 1                                                                                        |
| 100131431 | [No Symbol] | [No Name]                                                                                        |
| 114805    | GALNT13     | UDP-N-acetyl-alpha-D-galactosamine:polypeptide N-acetylgalactosaminyltransferase 13 (GalNAc-T13) |
| 7100      | TLR5        | toll-like receptor 5                                                                             |
| 388336    | SHISA6      | shisa homolog 6 (Xenopus laevis)                                                                 |
| 146845    | WDR16       | WD repeat domain 16                                                                              |
| 23127     | GLT25D2     | glycosyltransferase 25 domain containing 2                                                       |
| 400950    | LOC400950   | hypothetical LOC400950                                                                           |
| 728215    | FAM155A     | family with sequence similarity 155, member A                                                    |
| 442181    | RPSAP2      | ribosomal protein SA pseudogene 2                                                                |
| 151835    | CPNE9       | copine family member IX                                                                          |
| 2302      | FOXJ1       | forkhead box J1                                                                                  |
| 401190    | RGS7BP      | regulator of G-protein signaling 7 binding protein                                               |
| 2564      | GABRE       | gamma-aminobutyric acid (GABA) A receptor, epsilon                                               |
| 119694    | OR51F2      | olfactory receptor, family 51, subfamily F, member 2                                             |
| 644604    | EEF1A1P12   | eukaryotic translation elongation factor 1 alpha 1 pseudogene 12                                 |
| 243       | ALOX12P1    | arachidonate 12-lipoxygenase pseudogene 1                                                        |
| 2572      | GAD2        | glutamate decarboxylase 2 (pancreatic islets and brain, 65kDa)                                   |
| 116071    | BATF2       | basic leucine zipper transcription factor, ATF-like 2                                            |
| 55966     | AJAP1       | adherens junctions associated protein 1                                                          |
| 1395      | CRHR2       | corticotropin releasing hormone receptor 2                                                       |
| 3200      | HOXA3       | homeobox A3                                                                                      |
| 400224    | PLEKHD1     | pleckstrin homology domain containing, family D (with coiled-coil domains) member 1              |
| 441631    | TSPAN11     | tetraspanin 11                                                                                   |
| 100129386 | [No Symbol] | [No Name]                                                                                        |
| 1584      | CYP11B1     | cytochrome P450, family 11, subfamily B, polypeptide 1                                           |

|           |              |                                                                                 |
|-----------|--------------|---------------------------------------------------------------------------------|
| 55048     | VPS37C       | vacuolar protein sorting 37 homolog C ( <i>S. cerevisiae</i> )                  |
| 55084     | SOBP         | sine oculis binding protein homolog ( <i>Drosophila</i> )                       |
| 100128787 | LOC100128787 | similar to hCG1816414                                                           |
| 23617     | TSSK2        | testis-specific serine kinase 2                                                 |
| 285888    | CNPY1        | canopy 1 homolog (zebrafish)                                                    |
| 646058    | LOC646058    | chromosome 4 open reading frame 27 pseudogene                                   |
| 441818    | WBP11P1      | WW domain binding protein 11 pseudogene 1                                       |
| 5506      | PPP1R3A      | protein phosphatase 1, regulatory (inhibitor) subunit 3A                        |
| 7482      | WNT2B        | wingless-type MMTV integration site family, member 2B                           |
| 399967    | PATE2        | prostate and testis expressed 2                                                 |
| 51661     | FKBP7        | FK506 binding protein 7                                                         |
| 390006    | PPIAP19      | peptidylprolyl isomerase A (cyclophilin A) pseudogene 19                        |
| 26852     | RNU2-5P      | RNA, U2 small nuclear 5, pseudogene                                             |
| 144321    | GLIPR1L2     | GLI pathogenesis-related 1 like 2                                               |
| 64760     | FAM160B2     | family with sequence similarity 160, member B2                                  |
| 671       | BPI          | bactericidal/permeability-increasing protein                                    |
| 6334      | SCN8A        | sodium channel, voltage gated, type VIII, alpha subunit                         |
| 374977    | HEATR8       | HEAT repeat containing 8                                                        |
| 54991     | C1orf159     | chromosome 1 open reading frame 159                                             |
| 406906    | MIR122       | microRNA 122                                                                    |
| 100132713 | LOC100132713 | hypothetical protein LOC100132713                                               |
| 285676    | ZNF454       | zinc finger protein 454                                                         |
| 4987      | OPRL1        | opiate receptor-like 1                                                          |
| 100130986 | [No Symbol]  | [No Name]                                                                       |
| 53832     | IL20RA       | interleukin 20 receptor, alpha                                                  |
| 64240     | ABCG5        | ATP-binding cassette, sub-family G (WHITE), member 5                            |
| 100132978 | ATP6V0CP1    | ATPase, H <sup>+</sup> transporting, lysosomal 16kDa, V0 subunit c pseudogene 1 |
| 8712      | PAGE1        | P antigen family, member 1 (prostate associated)                                |
| 6236      | RRAD         | Ras-related associated with diabetes                                            |
| 58503     | PROL1        | proline rich, lacrimal 1                                                        |
| 10487     | CAP1         | CAP, adenylate cyclase-associated protein 1 (yeast)                             |
| 50604     | IL20         | interleukin 20                                                                  |
| 442153    | PSMC1P11     | proteasome (prosome, macropain) 26S subunit, ATPase, 1 pseudogene 11            |
| 66004     | LYNX1        | Ly6/neurotoxin 1                                                                |
| 6100      | RP9          | retinitis pigmentosa 9 (autosomal dominant)                                     |

|           |              |                                                                    |
|-----------|--------------|--------------------------------------------------------------------|
| 400451    | FAM174B      | family with sequence similarity 174, member B                      |
| 9441      | MED26        | mediator complex subunit 26                                        |
| 136991    | ASZ1         | ankyrin repeat, SAM and basic leucine zipper domain containing 1   |
| 65267     | WNK3         | WNK lysine deficient protein kinase 3                              |
| 22874     | PLEKHA6      | pleckstrin homology domain containing, family A member 6           |
| 391137    | RPS15P3      | ribosomal protein S15 pseudogene 3                                 |
| 2294      | FOXF1        | forkhead box F1                                                    |
| 85379     | KIAA1671     | KIAA1671                                                           |
| 7223      | TRPC4        | transient receptor potential cation channel, subfamily C, member 4 |
| 6340      | SCNN1G       | sodium channel, nonvoltage-gated 1, gamma                          |
| 388135    | C15orf59     | chromosome 15 open reading frame 59                                |
| 7325      | UBE2E2       | ubiquitin-conjugating enzyme E2E 2                                 |
| 2065      | ERBB3        | v-erb-b2 erythroblastic leukemia viral oncogene homolog 3 (avian)  |
| 729987    | LOC729987    | hypothetical protein LOC729987                                     |
| 401875    | LOC401875    | differentially expressed in FDCP 8 homolog (mouse) pseudogene      |
| 114818    | KLHL29       | kelch-like 29 (Drosophila)                                         |
| 1016      | CDH18        | cadherin 18, type 2                                                |
| 8120      | AP3B2        | adaptor-related protein complex 3, beta 2 subunit                  |
| 388503    | C3P1         | complement component 3 precursor pseudogene                        |
| 30818     | KCNIP3       | Kv channel interacting protein 3, calsenilin                       |
| 379027    | TSPY5P       | testis specific protein, Y-linked 5, pseudogene                    |
| 1828      | DSG1         | desmoglein 1                                                       |
| 2813      | GP2          | glycoprotein 2 (zymogen granule membrane)                          |
| 4004      | LMO1         | LIM domain only 1 (rhombotin 1)                                    |
| 401271    | [No Symbol]  | [No Name]                                                          |
| 84643     | KIF2B        | kinesin family member 2B                                           |
| 6917      | TCEA1        | transcription elongation factor A (SII), 1                         |
| 85449     | KIAA1755     | KIAA1755                                                           |
| 6674      | SPAG1        | sperm associated antigen 1                                         |
| 84787     | SUV420H2     | suppressor of variegation 4-20 homolog 2 (Drosophila)              |
| 51196     | PLCE1        | phospholipase C, epsilon 1                                         |
| 80157     | CWH43        | cell wall biogenesis 43 C-terminal homolog (S. cerevisiae)         |
| 139334    | IMPDH1P4     | IMP (inosine monophosphate) dehydrogenase 1 pseudogene 4           |
| 727897    | MUC5B        | mucin 5B, oligomeric mucus/gel-forming                             |
| 100128985 | LOC100128985 | nucleophosmin (nucleolar phosphoprotein B23, numatrin) pseudogene  |



|           |             |                                                                                         |
|-----------|-------------|-----------------------------------------------------------------------------------------|
| 25895     | METTL21B    | methyltransferase like 21B                                                              |
| 6954      | TCP11       | t-complex 11 homolog (mouse)                                                            |
| 400535    | FLJ44674    | FLJ44674 protein                                                                        |
| 2828      | GPR4        | G protein-coupled receptor 4                                                            |
| 118424    | UBE2J2      | ubiquitin-conjugating enzyme E2, J2                                                     |
| 94160     | ABCC12      | ATP-binding cassette, sub-family C (CFTR/MRP), member 12                                |
| 399694    | SHC4        | SHC (Src homology 2 domain containing) family, member 4                                 |
| 280       | AMY2B       | amylase, alpha 2B (pancreatic)                                                          |
| 84109     | QRFPR       | pyroglutamylated RFamide peptide receptor                                               |
| 442117    | GALNTL6     | UDP-N-acetyl-alpha-D-galactosamine:polypeptide N-acetylgalactosaminyltransferase-like 6 |
| 127833    | SYT2        | synaptotagmin II                                                                        |
| 644616    | LOC644616   | interleukin enhancer binding factor 2, 45kDa pseudogene                                 |
| 84812     | PLCD4       | phospholipase C, delta 4                                                                |
| 285016    | FAM150B     | family with sequence similarity 150, member B                                           |
| 27185     | DISC1       | disrupted in schizophrenia 1                                                            |
| 54806     | AHI1        | Abelson helper integration site 1                                                       |
| 646174    | C16orf90    | chromosome 16 open reading frame 90                                                     |
| 5792      | PTPRF       | protein tyrosine phosphatase, receptor type, F                                          |
| 728756    | [No Symbol] | [No Name]                                                                               |
| 85407     | NKD1        | naked cuticle homolog 1 (Drosophila)                                                    |
| 578       | BAK1        | BCL2-antagonist/killer 1                                                                |
| 23527     | ACAP2       | ArfGAP with coiled-coil, ankyrin repeat and PH domains 2                                |
| 3754      | KCNF1       | potassium voltage-gated channel, subfamily F, member 1                                  |
| 122449    | RPS29P1     | ribosomal protein S29 pseudogene 1                                                      |
| 81242     | OR52V1P     | olfactory receptor, family 52, subfamily V, member 1 pseudogene                         |
| 220164    | DOK6        | docking protein 6                                                                       |
| 11309     | SLCO2B1     | solute carrier organic anion transporter family, member 2B1                             |
| 9700      | ESPL1       | extra spindle pole bodies homolog 1 (S. cerevisiae)                                     |
| 153562    | MARVELD2    | MARVEL domain containing 2                                                              |
| 26468     | LHX6        | LIM homeobox 6                                                                          |
| 29070     | CCDC113     | coiled-coil domain containing 113                                                       |
| 50939     | IMPG2       | interphotoreceptor matrix proteoglycan 2                                                |
| 285555    | C4orf37     | chromosome 4 open reading frame 37                                                      |
| 5015      | OTX2        | orthodenticle homeobox 2                                                                |
| 100130087 | [No Symbol] | [No Name]                                                                               |

|           |              |                                                                                           |
|-----------|--------------|-------------------------------------------------------------------------------------------|
| 55258     | THNSL2       | threonine synthase-like 2 ( <i>S. cerevisiae</i> )                                        |
| 646053    | LOC646053    | nuclear factor NF-kappa-B p100 subunit-like                                               |
| 146894    | CD300LG      | CD300 molecule-like family member g                                                       |
| 100128442 | LOC100128442 | splicing factor, arginine/serine-rich 6 pseudogene                                        |
| 441609    | YWHAZP9      | tyrosine 3-monooxygenase/tryptophan 5-monooxygenase activation protein, zeta pseudogene 9 |
| 55691     | FRMD4A       | FERM domain containing 4A                                                                 |
| 4986      | OPRK1        | opioid receptor, kappa 1                                                                  |
| 100129702 | LOC100129702 | hypothetical protein LOC100129702                                                         |
| 648947    | LOC648947    | aldo-keto reductase family 1, member C pseudogene                                         |
| 203447    | NRK          | Nik related kinase                                                                        |
| 100129620 | LOC100129620 | hypothetical LOC100129620                                                                 |
| 196385    | DNAH10       | dynein, axonemal, heavy chain 10                                                          |
| 100129725 | LOC100129725 | PERP, TP53 apoptosis effector pseudogene                                                  |
| 401052    | LOC401052    | hypothetical LOC401052                                                                    |
| 9479      | MAPK8IP1     | mitogen-activated protein kinase 8 interacting protein 1                                  |
| 403278    | OR5K4        | olfactory receptor, family 5, subfamily K, member 4                                       |
| 7092      | TLL1         | tolloid-like 1                                                                            |
| 154043    | CNKSR3       | CNKSR family member 3                                                                     |
| 248       | ALPI         | alkaline phosphatase, intestinal                                                          |
| 283677    | C15orf60     | chromosome 15 open reading frame 60                                                       |
| 196500    | C12orf53     | chromosome 12 open reading frame 53                                                       |
| 100130522 | LOC100130522 | hypothetical LOC100130522                                                                 |
| 100132776 | [No Symbol]  | [No Name]                                                                                 |
| 285613    | RELL2        | RELT-like 2                                                                               |
| 400941    | FLJ42418     | hypothetical LOC400941                                                                    |
| 5332      | PLCB4        | phospholipase C, beta 4                                                                   |
| 1         | A1BG         | alpha-1-B glycoprotein                                                                    |
| 2719      | GPC3         | glypican 3                                                                                |
| 100132641 | BTF3P14      | basic transcription factor 3 pseudogene 14                                                |
| 645940    | LOC645940    | heterogeneous nuclear ribonucleoprotein A1-like                                           |
| 57578     | KIAA1409     | KIAA1409                                                                                  |
| 100129690 | LOC100129690 | RAD1 homolog ( <i>S. pombe</i> ) pseudogene                                               |
| 131096    | KCNH8        | potassium voltage-gated channel, subfamily H (eag-related), member 8                      |
| 79712     | GTDC1        | glycosyltransferase-like domain containing 1                                              |
| 100129857 | [No Symbol]  | [No Name]                                                                                 |

|           |              |                                                                     |
|-----------|--------------|---------------------------------------------------------------------|
| 283310    | OTOGL        | otogelin-like                                                       |
| 286499    | FAM133A      | family with sequence similarity 133, member A                       |
| 353189    | SLCO4C1      | solute carrier organic anion transporter family, member 4C1         |
| 153       | ADRB1        | adrenergic, beta-1-, receptor                                       |
| 100131710 | [No Symbol]  | [No Name]                                                           |
| 345016    | LOC345016    | pescadillo homolog 1, containing BRCT domain (zebrafish) pseudogene |
| 85320     | ABCC11       | ATP-binding cassette, sub-family C (CFTR/MRP), member 11            |
| 642381    | LOC642381    | speckle-type POZ protein-like pseudogene                            |
| 26533     | OR10G3       | olfactory receptor, family 10, subfamily G, member 3                |
| 158800    | RHOXF1       | Rhox homeobox family, member 1                                      |
| 80012     | PHC3         | polyhomeotic homolog 3 (Drosophila)                                 |
| 391075    | GAPDHP23     | glyceraldehyde 3 phosphate dehydrogenase pseudogene 23              |
| 50649     | ARHGEF4      | Rho guanine nucleotide exchange factor (GEF) 4                      |
| 6928      | HNF1B        | HNF1 homeobox B                                                     |
| 731940    | [No Symbol]  | [No Name]                                                           |
| 55800     | SCN3B        | sodium channel, voltage-gated, type III, beta                       |
| 338761    | C1QL4        | complement component 1, q subcomponent-like 4                       |
| 55669     | MFN1         | mitofusin 1                                                         |
| 100131117 | LOC100131117 | hypothetical LOC100131117                                           |
| 93622     | LOC93622     | hypothetical LOC93622                                               |
| 100130767 | [No Symbol]  | [No Name]                                                           |
| 146212    | KCTD19       | potassium channel tetramerisation domain containing 19              |
| 2299      | FOXI1        | forkhead box I1                                                     |
| 3764      | KCNJ8        | potassium inwardly-rectifying channel, subfamily J, member 8        |
| 2911      | GRM1         | glutamate receptor, metabotropic 1                                  |
| 255928    | SYT14        | synaptotagmin XIV                                                   |
| 100128505 | LOC100128505 | hypothetical LOC100128505                                           |
| 3745      | KCNB1        | potassium voltage-gated channel, Shab-related subfamily, member 1   |
| 729406    | LOC729406    | protein phosphatase 1 regulatory subunit 14B-like                   |
| 10376     | TUBA1B       | tubulin, alpha 1b                                                   |
| 162333    | 10-Mar       | membrane-associated ring finger (C3HC4) 10                          |
| 1672      | DEFB1        | defensin, beta 1                                                    |
| 83851     | SYT16        | synaptotagmin XVI                                                   |
| 147658    | ZNF534       | zinc finger protein 534                                             |
| 100132631 | [No Symbol]  | [No Name]                                                           |

|           |              |                                                                                                                         |
|-----------|--------------|-------------------------------------------------------------------------------------------------------------------------|
| 100128764 | PRKRIP6      | protein-kinase, interferon-inducible double stranded RNA dependent inhibitor, repressor of (P58 repressor) pseudogene 6 |
| 23245     | ASTN2        | astrotactin 2                                                                                                           |
| 4604      | MYBPC1       | myosin binding protein C, slow type                                                                                     |
| 54829     | ASPN         | asporin                                                                                                                 |
| 4224      | MEP1A        | mepirin A, alpha (PABA peptide hydrolase)                                                                               |
| 646696    | LOC646696    | MAX-like protein X pseudogene                                                                                           |
| 6242      | RTKN         | rhotekin                                                                                                                |
| 343515    | ATP6V1E1P1   | ATPase, H+ transporting, lysosomal 31kDa, V1 subunit E1 pseudogene 1                                                    |
| 51412     | ACTL6B       | actin-like 6B                                                                                                           |
| 343450    | KCNT2        | potassium channel, subfamily T, member 2                                                                                |
| 100131031 | LOC100131031 | similar to hCG2041190                                                                                                   |
| 2641      | GCG          | glucagon                                                                                                                |
| 4850      | CNOT4        | CCR4-NOT transcription complex, subunit 4                                                                               |
| 284269    | LOC284269    | chromosome 9 open reading frame 86 pseudogene                                                                           |
| 148713    | PTPRVP       | protein tyrosine phosphatase, receptor type, V, pseudogene                                                              |
| 51352     | WT1-AS       | WT1 antisense RNA (non-protein coding)                                                                                  |
| 646430    | LOC646430    | amyloid P component, serum pseudogene                                                                                   |
| 124817    | CNTD1        | cyclin N-terminal domain containing 1                                                                                   |
| 729330    | OC90         | otoconin 90                                                                                                             |
| 29119     | CTNNA3       | catenin (cadherin-associated protein), alpha 3                                                                          |
| 131540    | ZDHC19       | zinc finger, DHHC-type containing 19                                                                                    |
| 117531    | TMC1         | transmembrane channel-like 1                                                                                            |
| 90070     | LACRT        | lacritin                                                                                                                |
| 89        | ACTN3        | actinin, alpha 3                                                                                                        |
| 140739    | UBE2F        | ubiquitin-conjugating enzyme E2F (putative)                                                                             |
| 1290      | COL5A2       | collagen, type V, alpha 2                                                                                               |
| 100129101 | LOC100129101 | hypothetical protein LOC100129101                                                                                       |
| 285679    | C5orf60      | chromosome 5 open reading frame 60                                                                                      |
| 390791    | LOC390791    | peptidyl-prolyl cis-trans isomerase A-like                                                                              |
| 9971      | NR1H4        | nuclear receptor subfamily 1, group H, member 4                                                                         |
| 414194    | CCNYL2       | cyclin Y-like 2                                                                                                         |
| 145957    | NRG4         | neuregulin 4                                                                                                            |
| 83938     | C10orf11     | chromosome 10 open reading frame 11                                                                                     |
| 91862     | MARVELD3     | MARVEL domain containing 3                                                                                              |
| 11285     | B4GALT7      | xylosylprotein beta 1,4-galactosyltransferase, polypeptide 7 (galactosyltransferase I)                                  |

|           |             |                                                                      |
|-----------|-------------|----------------------------------------------------------------------|
| 192669    | EIF2C3      | eukaryotic translation initiation factor 2C, 3                       |
| 84465     | MEGF11      | multiple EGF-like-domains 11                                         |
| 10814     | CPLX2       | complexin 2                                                          |
| 326309    | RPL7AP5     | ribosomal protein L7a pseudogene 5                                   |
| 79785     | RERGL       | RERG/RAS-like                                                        |
| 9590      | AKAP12      | A kinase (PRKA) anchor protein 12                                    |
| 56063     | TMEM234     | transmembrane protein 234                                            |
| 344653    | LOC344653   | ATP-binding cassette, sub-family F (GCN20), member 2 pseudogene      |
| 57188     | ADAMTSL3    | ADAMTS-like 3                                                        |
| 130728    | RPL7P13     | ribosomal protein L7 pseudogene 13                                   |
| 56967     | C14orf132   | chromosome 14 open reading frame 132                                 |
| 387712    | ENO4        | enolase family member 4                                              |
| 404220    | C6orf201    | chromosome 6 open reading frame 201                                  |
| 3856      | KRT8        | keratin 8                                                            |
| 100128282 | [No Symbol] | [No Name]                                                            |
| 246119    | TTY10       | testis-specific transcript, Y-linked 10 (non-protein coding)         |
| 92292     | GLYATL1     | glycine-N-acyltransferase-like 1                                     |
| 3356      | HTR2A       | 5-hydroxytryptamine (serotonin) receptor 2A                          |
| 645357    | LOC645357   | kinesin family member pseudogene                                     |
| 22902     | RUFY3       | RUN and FYVE domain containing 3                                     |
| 130106    | CIB4        | calcium and integrin binding family member 4                         |
| 203074    | PRSS55      | protease, serine, 55                                                 |
| 1009      | CDH11       | cadherin 11, type 2, OB-cadherin (osteoblast)                        |
| 8513      | LIPF        | lipase, gastric                                                      |
| 2694      | GIF         | gastric intrinsic factor (vitamin B synthesis)                       |
| 4640      | MYO1A       | myosin IA                                                            |
| 284615    | ANKRD34A    | ankyrin repeat domain 34A                                            |
| 3850      | KRT3        | keratin 3                                                            |
| 6376      | CX3CL1      | chemokine (C-X3-C motif) ligand 1                                    |
| 154313    | C6orf165    | chromosome 6 open reading frame 165                                  |
| 1091      | CEACAMP2    | carcinoembryonic antigen-related cell adhesion molecule pseudogene 2 |
| 11093     | ADAMTS13    | ADAM metallopeptidase with thrombospondin type 1 motif, 13           |
| 56156     | TEX13B      | testis expressed 13B                                                 |
| 4653      | MYOC        | myocilin, trabecular meshwork inducible glucocorticoid response      |
| 100132358 | EEF1A1P34   | eukaryotic translation elongation factor 1 alpha 1 pseudogene 34     |

|           |              |                                                                        |
|-----------|--------------|------------------------------------------------------------------------|
| 340156    | MYLK4        | myosin light chain kinase family, member 4                             |
| 283446    | MYO1H        | myosin IH                                                              |
| 100131598 | [No Symbol]  | [No Name]                                                              |
| 93233     | CCDC114      | coiled-coil domain containing 114                                      |
| 84062     | DTNBP1       | dystrobrevin binding protein 1                                         |
| 100129644 | [No Symbol]  | [No Name]                                                              |
| 100130275 | LOC100130275 | hypothetical LOC100130275                                              |
| 51121     | RPL26L1      | ribosomal protein L26-like 1                                           |
| 399965    | LOC399965    | hypothetical gene supported by AK128036                                |
| 84448     | ABLIM2       | actin binding LIM protein family, member 2                             |
| 3198      | HOXA1        | homeobox A1                                                            |
| 56924     | PAK6         | p21 protein (Cdc42/Rac)-activated kinase 6                             |
| 23114     | NFASC        | neurofascin                                                            |
| 55321     | C20orf46     | chromosome 20 open reading frame 46                                    |
| 57214     | KIAA1199     | KIAA1199                                                               |
| 9498      | SLC4A8       | solute carrier family 4, sodium bicarbonate cotransporter, member 8    |
| 6559      | SLC12A3      | solute carrier family 12 (sodium/chloride transporters), member 3      |
| 113691    | MGC16703     | tubulin, alpha pseudogene                                              |
| 2877      | GPX2         | glutathione peroxidase 2 (gastrointestinal)                            |
| 55531     | ELMOD1       | ELMO/CED-12 domain containing 1                                        |
| 680       | BRS3         | bombesin-like receptor 3                                               |
| 6527      | SLC5A4       | solute carrier family 5 (low affinity glucose cotransporter), member 4 |
| 133874    | C5orf58      | chromosome 5 open reading frame 58                                     |
| 4319      | MMP10        | matrix metalloproteinase 10 (stromelysin 2)                            |
| 6331      | SCN5A        | sodium channel, voltage-gated, type V, alpha subunit                   |
| 5460      | POU5F1       | POU class 5 homeobox 1                                                 |
| 10411     | RAPGEF3      | Rap guanine nucleotide exchange factor (GEF) 3                         |
| 55282     | LRRRC36      | leucine rich repeat containing 36                                      |
| 1620      | DBC1         | deleted in bladder cancer 1                                            |
| 8460      | TPST1        | tyrosylprotein sulfotransferase 1                                      |
| 100129287 | [No Symbol]  | [No Name]                                                              |
| 645960    | LOC645960    | similar to hCG1644362                                                  |
| 8796      | SCEL         | sciellin                                                               |
| 100128676 | LOC100128676 | TBCC domain containing 1 pseudogene                                    |
| 374655    | ZNF710       | zinc finger protein 710                                                |

|           |              |                                                                 |
|-----------|--------------|-----------------------------------------------------------------|
| 181       | AGRP         | agouti related protein homolog (mouse)                          |
| 391428    | SEPHS1P7     | selenophosphate synthetase 1 pseudogene 7                       |
| 8647      | ABCB11       | ATP-binding cassette, sub-family B (MDR/TAP), member 11         |
| 646543    | LOC646543    | hypothetical protein LOC646543                                  |
| 284338    | PRR19        | proline rich 19                                                 |
| 100130995 | LOC100130995 | KRAB domain-containing protein ZNF321-like                      |
| 65012     | SLC26A10     | solute carrier family 26, member 10                             |
| 100129653 | [No Symbol]  | [No Name]                                                       |
| 94233     | OPN4         | opsin 4                                                         |
| 89884     | LHX4         | LIM homeobox 4                                                  |
| 121256    | TMEM132D     | transmembrane protein 132D                                      |
| 10391     | CORO2B       | coronin, actin binding protein, 2B                              |
| 91683     | SYT12        | synaptotagmin XII                                               |
| 647188    | [No Symbol]  | [No Name]                                                       |
| 128674    | PROKR2       | prokineticin receptor 2                                         |
| 148066    | ZNRF4        | zinc and ring finger 4                                          |
| 283129    | C11orf85     | chromosome 11 open reading frame 85                             |
| 10481     | HOXB13       | homeobox B13                                                    |
| 100131552 | [No Symbol]  | [No Name]                                                       |
| 10618     | TGOLN2       | trans-golgi network protein 2                                   |
| 100128134 | [No Symbol]  | [No Name]                                                       |
| 8756      | ADAM7        | ADAM metallopeptidase domain 7                                  |
| 27115     | PDE7B        | phosphodiesterase 7B                                            |
| 284427    | SLC25A41     | solute carrier family 25, member 41                             |
| 100131257 | LOC100131257 | zinc finger protein 655 pseudogene                              |
| 728549    | LOC728549    | calcium binding protein P22 pseudogene                          |
| 283208    | P4HA3        | prolyl 4-hydroxylase, alpha polypeptide III                     |
| 57053     | CHRNA10      | cholinergic receptor, nicotinic, alpha 10                       |
| 51560     | RAB6B        | RAB6B, member RAS oncogene family                               |
| 183       | AGT          | angiotensinogen (serpin peptidase inhibitor, clade A, member 8) |
| 143458    | LDLRAD3      | low density lipoprotein receptor class A domain containing 3    |
| 283652    | SLC24A5      | solute carrier family 24, member 5                              |
| 23514     | KIAA0146     | KIAA0146                                                        |
| 339403    | RXFP4        | relaxin/insulin-like family peptide receptor 4                  |
| 130951    | C2orf65      | chromosome 2 open reading frame 65                              |

|           |              |                                                                                          |
|-----------|--------------|------------------------------------------------------------------------------------------|
| 100128076 | LOC100128076 | protein tyrosine phosphatase pseudogene                                                  |
| 7288      | TULP2        | tubby like protein 2                                                                     |
| 114788    | CSMD3        | CUB and Sushi multiple domains 3                                                         |
| 4883      | NPR3         | natriuretic peptide receptor C/guanylate cyclase C (atrionatriuretic peptide receptor C) |
| 57554     | LRR7         | leucine rich repeat containing 7                                                         |
| 5794      | PTPRH        | protein tyrosine phosphatase, receptor type, H                                           |
| 150159    | NHEDC1       | Na <sup>+</sup> /H <sup>+</sup> exchanger domain containing 1                            |
| 100129633 | [No Symbol]  | [No Name]                                                                                |
| 285590    | SH3PXD2B     | SH3 and PX domains 2B                                                                    |
| 81833     | SPACA1       | sperm acrosome associated 1                                                              |
| 221241    | NCRNA00305   | non-protein coding RNA 305                                                               |
| 84189     | SLITRK6      | SLIT and NTRK-like family, member 6                                                      |
| 65979     | PHACTR4      | phosphatase and actin regulator 4                                                        |
| 10278     | EFS          | embryonal Fyn-associated substrate                                                       |
| 645754    | LOC645754    | lectin, galactoside-binding, soluble, 9 pseudogene                                       |
| 10395     | DLC1         | deleted in liver cancer 1                                                                |
| 219621    | C10orf107    | chromosome 10 open reading frame 107                                                     |
| 57579     | FAM135A      | family with sequence similarity 135, member A                                            |
| 137902    | PXDNL        | peroxidase homolog (Drosophila)-like                                                     |
| 93649     | MYOCD        | myocardin                                                                                |
| 2327      | FMO2         | flavin containing monooxygenase 2 (non-functional)                                       |
| 23105     | FSTL4        | follicle-stimulating hormone-like 4                                                      |
| 1271      | CNTFR        | ciliary neurotrophic factor receptor                                                     |
| 729417    | [No Symbol]  | [No Name]                                                                                |
| 83539     | CHST9        | carbohydrate (N-acetylgalactosamine 4-O) sulfotransferase 9                              |
| 26280     | IL1RAPL2     | interleukin 1 receptor accessory protein-like 2                                          |
| 8749      | ADAM18       | ADAM metalloproteinase domain 18                                                         |
| 4916      | NTRK3        | neurotrophic tyrosine kinase, receptor, type 3                                           |
| 100127920 | [No Symbol]  | [No Name]                                                                                |
| 92293     | TMEM132C     | transmembrane protein 132C                                                               |
